# Supplementary material for: Proximity extracellular protein-protein interaction analysis of EGFR using AirID-conjugated fragment of antigen binding
Source: Research Square preprint supplement (doi:10.21203/rs.3.rs-2522335/v1), 2023-02-09
Supplement: Supplementary file 3 [file 77dc08cd3334ec0e31e03843.xlsx]

## Sheet: Fig4
Fig. 4e
	Log2(EGFR-FabID/AGIA-FabID):DMSO	Log2(EGFR-FabID/AGIA-FabID):DMSO+EGF	Log2(EGFR-FabID/AGIA-FabID):Gefitinib+EGF
K487,489	3.63	3.88	5.52
K479	1.76	2.31	3.86
K454	0.89	1.08	0.98
K489	-0.34	1.63	1.72

## Sheet: Fig6
Fig6c						Fig6d				Fig6d										Fig6b
AlphaScreen signal	DHFR	PTK7	INSRalpha	ADAM17		NanoBiT signal	PTK7-DHFR	PTK7-EGFR		NanoBiT signal	INSR-DHFR	INSR-EGFR								A431	Log2(EGFR-FabID/AGIA-FabID):DMSO	Log2(EGFR-FabID/AGIA-FabID):DMSO+EGF	Log2(EGFR-FabID/AGIA-FabID):Gefitinib+EGF		NCI-H226	Log2(EGFR-FabID/AGIA-FabID):DMSO	Log2(EGFR-FabID/AGIA-FabID):DMSO+EGF	Log2(EGFR-FabID/AGIA-FabID):Gefitinib+EGF
n=1	564	16712	4972	2484		n=1	4058	120024		n=1	14792	255474								EGFR	0.65	1.89	3.37		EGFR	0.75	3.02	1.6
n=2	556	16440	4140	2216		n=2	4247	125308		n=2	16052	248806								PTK7	4.45	4.54	6.12		PTK7	2.06	1.73	1.41
n=3	584	17776	4700	2424		n=3	4473	89267		n=3	16355	249189								GPC1	3.85	3.3	4.58		GPC1	3.13	2.04	2.2
																				MICA	3.36	4.11	3.17		MICA	3.52	3.25	2.45
Fig6e (control)					Fig6e (PTK7)					Fig6e (INSR)					Fig6e (ADAM17)					ICAM1	1.66	2.2	2.84		ICAM1	0.37	0.75	0.47
Dot numbers on PLA/nucleus	DMSO	DMSO+EGF	Gefitinib+EGF		Dot numbers on PLA/nucleus	DMSO	DMSO+EGF	Gefitinib+EGF		Dot numbers on PLA/nucleus	DMSO	DMSO+EGF	Gefitinib+EGF		Dot numbers on PLA/nucleus					PLXNB2	1.75	2.16	2.17		PLXNB2	1.07	0.29	1.07
n=1	1.16667	1	0.791667		n=1	9.58974	11.8571	7.03125		n=1	2.63158	8.81818	9.76923		n=1	1.2766	1.5	3		DCBLD2	1.73	1.68	0.86		DCBLD2	2	1.63	1
n=2	2.05882	2.22222	0.736842		n=2	7.88889	13.8947	7.84211		n=2	3.86957	8.29167	12.2727		n=2	2.30769	1.33333	2.28571		INSR	1.7	2.9	2.29		INSR	2.76	2.86	1.84
n=3	1	2	0.962963		n=3	7.32353	14.0385	4.29167		n=3	2.10714	5.57143	3.82353		n=3	1.78571	0.666667	4		ADAM17	1.14	2.28	3.61		ADAM17	0.51	1.14	0.69
n=4	1	1.5	1.61111		n=4	11.0435	15.9474	5.25		n=4	2.84615	3.125	4.92		n=4	2.3	1.14286	2.875		ENO1	1.4	0.67	0.56		ENO1	0	0.17	0.08
n=5	1.18182	1.5	1.125		n=5	11.5789	7.08571	7.63158		n=5	1.85185	5.4	6.05		n=5	1.6	1	3.5		CA2	0.75	0.08	-0.18		CA2	0.62	1.49	1.28
n=6	1.2	2	0.833333		n=6	7.10714	9.90625	7.23529		n=6	2.28	5.8	16.9231		n=6	1.88889	2	3.66667		EFNB1	0.68	0.79	-0.16		EFNB1	0.92	1.3	1.13
n=7	1.33333	2	0.555556		n=7	5.18182	6.72727	5.57895		n=7	2.05	8.22222	22.4		n=7	1.66667	2.66667	3.66667		ANXA2	0.67	0.85	0.08		ANXA2	1.14	1.3	1.38
n=8	2.16667	3.1	1.61111		n=8	10.5714	16.6	5		n=8	1.8	5.78571	11.76		n=8	2.93333	1	3		EEF1A1	0.28	-0.3	-0.1		EEF1A1	0.89	0.76	1.08
n=9	1.45455	1.75	2		n=9	10.5455	8.64286	4.96		n=9	3.66667	6.11111	12.8462		n=9	2.125	1.18182	2		DSG2	-0.07	0.1	1.14		DSG2	2.04	1.48	2.11
																				CD44	-0.39	-0.2	0.29		CD44	0.98	0.83	0.94
																				ITGA6	-0.73	-0.67	-0.01		ITGA6	-0.02	0.97	0.43
																				GAPDH	-0.26	-0.5	-0.69		GAPDH	0.54	0.84	0.74
																				SLC3A2	-0.68	-1.17	-0.03		SLC3A2	0.71	0.26	0.68
																				HLA-A	-1.57	-0.9	-0.07		HLA-A	0.57	1.55	1.25
Fig 6e ( Andy's Algorithm parameter)
	Area	MinThr	MaxThr	Nucleus Lower Size Exclusion	Nucleus Upper Size Exclusion	Nucleus Lower Circularity Exclusion	Nucleus Upper Circularity Exclusion	Nucleus Watershed	Nucleus Exclusion	Nucleus Bright Radius	Nucleus Bright Threshold	Nucleus Dark Radius	Nucleus Dark Threshold	Nucleus Gaussian Blur	Nucleus Lower Threshold	Nucleus Upper Threshold	Foci Gaussian Blur	Foci Maxima Value	Cytoplasm Bright Radius	Cytoplasm Bright Threshold	Cytoplasm Dark Radius	Cytoplasm Dark Threshold	Cytoplasm Gaussian Blur	Cytoplasm Lower Threshold	Cytoplasm Upper Threshold	Cytoplasm Lower Size Exclusion	Cytoplasm Upper Size Exclusion	Cytoplasm Lower Circularity Exclusion	Cytoplasm Upper Circularity Exclusion	Cytoplasm Watershed	Cytoplasm Exclusion
1	563176	10	255	10000	NaN	0	1	1	0	5	50	5	20	2	255	255	0	0	NaN	NaN	NaN	NaN	NaN	NaN	NaN	NaN	NaN	NaN	NaN	NaN	NaN

## Sheet: Extended Data Fig5
	Extended Data Fig.5(A431)	Log2(EGFR-FabID/AGIA-FabID):DMSO	Log2(EGFR-FabID/AGIA-FabID):DMSO+EGF	Log2(EGFR-FabID/AGIA-FabID):Gefitinib+EGF		Extended Data Fig.5(NCI-H226)	Log2(EGFR-FabID/AGIA-FabID):DMSO	Log2(EGFR-FabID/AGIA-FabID):DMSO+EGF	Log2(EGFR-FabID/AGIA-FabID):Gefitinib+EGF
	ST14	4.54	4.13	3.74		CDH11	4.87	5.07	4.94
	CDH3	3.83	3.7	2.8		GABARAP	3.64	2.5	3.09
	F11R	2.95	2	1.23		LRP1	2.91	2.3	2.03
	PCDH1	1.74	1.64	0.4		EFNA5	2.84	1.67	2.3
	HSPA8	1.67	0.37	0.98		SLC39A10	1.8	1.16	0.49
	DSG3	1.44	0.92	3.32		KHDRBS1	1.77	1.33	1.98
	HLA-B	1.27	1.13	1.98		COL18A1	1.75	1.52	0.6
	HSP90AA1	1.23	-0.05	0.41		ANOS1	1.7	1.21	1.22
	MAPT	0.81	0.94	1.8		DSC3	1.63	1.03	1.41
	NEO1	0.71	1.35	1.51		ADGRG6	1.5	0.63	0.36
	EPCAM	0.57	1.13	1.12		S100A10	1.42	1.71	1.34
	PPIB	0.56	0.35	0.58		VASN	1.41	1.74	0.72
	LAMB3	0.4	0.57	-0.32		KRT1	1	1.25	1
	CANX	0.35	-0.11	-0.2		CD99L2	1	1.31	0.93
	HSP90AB1	0.32	-0.1	0.21		EZR	0.95	2.27	1.28
	CFL1	0.28	1.97	2.66		STXBP1	0.87	1.7	1.11
	LAMA3	0.2	-0.23	-0.56		SQSTM1	0.87	1.4	-0.17
	CKMT1B	0.09	-0.11	-0.15		CEMIP2	0.82	0.79	0.73
	RUVBL1	-0.01	-0.4	0.51		BSG	0.79	1.06	0.56
	ALPP	-0.08	0.32	0.83		CEMIP	0.74	1.05	1.34
	CDH5	-0.1	0.33	0.85		ATP5F1A	0.7	1.02	1.48
	TACSTD2	-0.69	-0.66	0.58		NFASC	0.67	1.46	0.58
	TGFBI	0.04	-0.42	0.09		OLR1	0.65	-0.04	0.55
						L1CAM	0.59	0.65	0.72
						PTPRF	0.51	0.82	0.88
						TENM2	0.48	0.41	0.6
						MELTF	0.46	1.26	0.3
						BCAM	0.44	1.59	0.74
						LAMA5	0.44	0.8	0.87
						ARFGAP2	0.4	1.02	0.42
						FGFBP1	0.37	1.06	1.13
						PODXL	0.31	0.23	0.38
						ALCAM	0.3	0.42	0.15
						HSPG2	0.27	0.71	0.46
						EPHB6	0.19	1.32	-0.06
						CLU	0.15	3.82	0.85
						ITGA3	0.13	0.63	0.59
						ITGB1	0.11	1.05	0.57
						ATP1B3	0.1	-0.09	0.06
						TFRC	0.1	0.09	0.5
						ITGB4	0.01	0.12	0.75
						AGRN	-0.1	0.97	0.28
						CLINT1	-0.51	0.67	-0.62
						FAS	-0.64	-0.1	0.34
						SEPTIN2	-1.3	-0.64	-1.81
						HLA-C	0.95	3.27	-1
