# Supplementary material for: Proximity extracellular protein-protein interaction analysis of EGFR using AirID-conjugated fragment of antigen binding
Source: Research Square preprint supplement (doi:10.21203/rs.3.rs-2522335/v1), 2023-02-09
Supplement: Supplementary file 4 [file 84ebe3d7e46667aab49710e8.docx]

File Name: Supplementary Table 1

Description: Project description Expi293F cells were transfected with pcDNA3.1-EGFR and treated with AGIA-FabID or EGFR-FabID in three biological replicates. Cell lysates were subjected to methanol-chloroform precipitation and digested with trypsin. Biotinylated peptides were purified by Tamavidin 2-REV and identified by LC-MS/MS analysis.

File Name: Supplementary Table 2

Description: A431 cells were pretreated with DMSO or gefitinib and unstimulated or stimulated with EGF. Then AGIA-FabID or EGFR-FabID were added to the cells in three biological replicates. Cell lysates were subjected to methanol-chloroform precipitation and digested with trypsin. Biotinylated peptides were purified by Tamavidin 2-REV and identified by LC-MS/MS analysis.

File Name: Supplementary Table 3

Description: NCI-H226 cells were pretreated with DMSO or gefitinib and unstimulated or stimulated with EGF. Then AGIA-FabID or EGFR-FabID were added to the cells in three biological replicates. Cell lysates were subjected to methanol-chloroform precipitation and digested with trypsin. Biotinylated peptides were purified by Tamavidin 2-REV and identified by LC-MS/MS analysis.

File Name: Supplementary Table 4

Description: Protein data for Supplementary Table 2.

File Name: Supplementary Table 5

Description: Protein data for Supplementary Table 3
