# Supplementary material for: Proximity extracellular protein-protein interaction analysis of EGFR using AirID-conjugated fragment of antigen binding
Source: Research Square preprint supplement (doi:10.21203/rs.3.rs-2522335/v1), 2023-02-09
Supplement: Supplementary file 6 [file a6624e6c519e23a7ccd32b1b.xlsx]

## Sheet: peptideGroupe
Annotated Sequence	Modifications	# Proteins	# PSMs	Master Protein Accessions	Positions in Master Proteins	Modifications in Master Proteins	Master Protein Descriptions	# Missed Cleavages	Theo. MH+ [Da]	Abundance Ratio: (10) / (1) EGFR-FabID DMSO/AGIA-FabID DMSO	Abundance Ratio: (13) / (10) EGFR-FabID DMSO EGF/EGFR-FabID DMSO	Abundance Ratio: (16) / (13) EGFR-FabID Gefitinib EGF/EGFR-FabID DMSO EGF	Abundance Ratio: (13) / (4) -EGFR-FabID DMSO EGF/AGIA-FabID DMSO EGF	Abundance Ratio: (16) / (7) EGFR-FabID Gefitinib EGF/AGIA-FabID Gefitinib EGF	Abundances (Grouped): 1 AGIA-FabID DMSO	Abundances (Grouped): 10 EGFR-FabID DMSO	Abundances (Grouped): 13 EGFR-FabID DMSO EGF	Abundances (Grouped): 16 EGFR-FabID Gefitinib EGF	Abundances (Grouped): 4 AGIA-FabID DMSO EGF	Abundances (Grouped): 7 AGIA-FabID Gefitinib EGF	Abundances (Scaled): F5: Sample, 1 AGIA-FabID DMSO n=1	Abundances (Scaled): F15: Sample, 1 AGIA-FabID DMSO n=2	Abundances (Scaled): F21: Sample, 1 AGIA-FabID DMSO n=3	Abundances (Scaled): F8: Sample, 10 EGFR-FabID DMSO n=1	Abundances (Scaled): F18: Sample, 10 EGFR-FabID DMSO n=2	Abundances (Scaled): F24: Sample, 10 EGFR-FabID DMSO n=3	Abundances (Scaled): F9: Sample, 13 EGFR-FabID DMSO EGF n=1	Abundances (Scaled): F19: Sample, 13 EGFR-FabID DMSO EGF n=2	Abundances (Scaled): F25: Sample, 13 EGFR-FabID DMSO EGF n=3	Abundances (Scaled): F10: Sample, 16 EGFR-FabID Gefitinib EGF n=1	Abundances (Scaled): F20: Sample, 16 EGFR-FabID Gefitinib EGF n=2	Abundances (Scaled): F26: Sample, 16 EGFR-FabID Gefitinib EGF n=3	Abundances (Scaled): F6: Sample, 4 AGIA-FabID DMSO EGF n=1	Abundances (Scaled): F16: Sample, 4 AGIA-FabID DMSO EGF n=2	Abundances (Scaled): F22: Sample, 4 AGIA-FabID DMSO EGF n=3	Abundances (Scaled): F7: Sample, 7 AGIA-FabID Gefitinib EGF n=1	Abundances (Scaled): F17: Sample, 7 AGIA-FabID Gefitinib EGF n=2	Abundances (Scaled): F23: Sample, 7 AGIA-FabID Gefitinib EGF n=3	Abundances (Normalized): F5: Sample, 1 A431-AGIA-FabID DMSO n=1	Abundances (Normalized): F15: Sample, 1 A431-AGIA-FabID DMSO n=2	Abundances (Normalized): F21: Sample, 1 A431-AGIA-FabID DMSO n=3	Abundances (Normalized): F8: Sample, 10 A431-EGFR-FabID DMSO n=1	Abundances (Normalized): F18: Sample, 10 A431-EGFR-FabID DMSO n=2	Abundances (Normalized): F24: Sample, 10 A431-EGFR-FabID DMSO n=3	Abundances (Normalized): F9: Sample, 13 A431-EGFR-FabID DMSO EGF n=1	Abundances (Normalized): F19: Sample, 13 A431-EGFR-FabID DMSO EGF n=2	Abundances (Normalized): F25: Sample, 13 A431-EGFR-FabID DMSO EGF n=3	Abundances (Normalized): F10: Sample, 16 A431-EGFR-FabID Gefitinib EGF n=1	Abundances (Normalized): F20: Sample, 16 A431-EGFR-FabID Gefitinib EGF n=2
[K].DINVKWK.[I]	1xBiotin [K5]	1	74	EMab-134	EMab-134 [167-173]	EMab-134 1xBiotin [K171]	Light	1	1128.59	1000	0.905	1.01	1000	1000	0.2	203.9	196.8	198.8	0.1	0.1	0.1	0.2	0.3	196	233.7	202	177.4	195	208.7	197	205.8	183.2	0.1	0.2	0.1	0.1	0.2	0.1	3973.07	5648.7	9771.98	6.96973e+06	8.31143e+06	7.18458e+06	6.30885e+06	6.93377e+06	7.42257e+06	7.0047e+06	7.32005e+06
[R].HNSYTCEATHKTSTSPIVK.[S]	1xBiotin [K]; 1xCarbamidomethyl [C6]	1	46	EMab-134	EMab-134 [213-231]	EMab-134 1xBiotin [K]	Light	1	2387.11	519.779	1.045	1.011	399.981	639.004	0.4	187.3	208.4	203.2	0.5	0.3	0.4	0.4	0.3	154.3	192.6	232.5	161.2	214.3	216.4	197.5	209	218.7	0.5	0.5	0.5	0.3	0.2	0.4	3132.17	2780.97	2279.64	1.15767e+06	1.44549e+06	1.74502e+06	1.20998e+06	1.60855e+06	1.62383e+06	1.48218e+06	1.56834e+06
[K].TSTSPIVKSFNR.[N]	1xBiotin [K8]	1	77	EMab-134	EMab-134 [224-235]	EMab-134 1xBiotin [K231]	Light	1	1562.8	476.432	1.035	1.043	377.971	512.749	0.4	192.8	199.2	206.5	0.6	0.5	0.3	0.4	0.4	188.1	196.9	172.8	223.5	179	194.4	253.1	201.5	186.7	0.6	0.6	0.5	0.5	0.3	0.5	1976.99	2753.84	2988.76	1.31202e+06	1.37329e+06	1.20559e+06	1.55883e+06	1.24826e+06	1.356e+06	1.76551e+06	1.4058e+06
[K].DNSKSQVFLK.[M]	1xBiotin [K4]	1	43	EGFR-fabID	EGFR-fabID [91-100]	EGFR-fabID 1xBiotin [K94]	Heavy	1	1391.7	361.105	1.032	1.098	224.277	397.781	0.5	188.9	194.4	214.8	0.9	0.5	0.4	0.5	0.8	181.7	163.3	195.5	248.6	168.6	187.1	257.5	185.2	206.7	0.8	0.8	0.9	0.5	0.5	0.6	1819.63	2409.4	3870.35	870045	781989	936157	1.19009e+06	807255	895706	1.23276e+06	886681
[R].ILDPTKLGPR.[M]	1xBiotin [K6]	5	23	Q13308-1	Q13308-1 [631-640]	Q13308-1 1xBiotin [K636]	Inactive tyrosine-protein kinase 7 [OS=Homo sapiens]	1	1335.75	41.354	0.957	1.159	44.002	148.435	4.7	192.4	184.1	213.2	4.2	1.4	4.3	4.9	4.7	148.5	195.6	227.8	187.2	161.7	195.3	210.5	226.2	216.8	4.3	4.4	3.6	0.9	1.5	1.8	13288.4	15152.1	14650	459792	605839	705519	579827	500720	604747	652013	700692
[K].WKIDGSER.[Q]	1xBiotin [K2]	1	12	EMab-134	EMab-134 [172-179]	EMab-134 1xBiotin [K173]	Light	1	1216.58	112.182	1.082	0.917	128.655	115.798	1.7	193.5	209.4	192.1	1.6	1.7	1.5	2	1.7	137.5	194.3	229.5	189.7	238.9	210.3	181.3	192.9	211	1.1	1.6	2	1.8	1.7	1	2685.88	3742.3	3095.45	251559	355418	419820	346924	436919	384551	331571	352822
[K].VIQGCGNPKVNPQGPGPEEK.[R]	1xBiotin [K]; 1xCarbamidomethyl [C5]	1	26	P35052	P35052 [339-358]	P35052 1xBiotin [K]	Glypican-1 [OS=Homo sapiens]	1	2331.12	89.812	1	1.102	60.849	75.42	2.2	201.3	179	211.8	2.9	2.7	2.6	2	2.2	140.1	197.6	240.3	148.7	175.7	240.4	159.9	208	264.9	3.1	2.8	2.9	2.7	2.6	3.5	2656.35	2060.19	2255.74	143577	202593	246397	152391	180118	246469	163970	213223
[K].ITSDYQATQKITYR.[I]	1xBiotin [K10]	1	20	P32926	P32926 [73-86]	P32926 1xBiotin [K82]	Desmoglein-3 [OS=Homo sapiens]	1	1913.94	13.774	0.762	3.633	7.311	56.841	9.8	134.4	89.9	347.5	12.3	6.1	9.8	7.5	11.2	141.1	114.6	134.8	120.1	87.3	90.2	348.6	317.3	348.7	21.7	11.4	12.3	5.3	11.8	6.1	3435.9	2644.81	3943.52	49533.5	40245.2	47325.3	42171.5	30665	31657.4	122389	111419
[K].LLIKYASNLESGVPAR.[F]	1xBiotin [K4]	1	46	EMab-134	EMab-134 [70-85]	EMab-134 1xBiotin [K73]	Light	1	1957.06	100.62	1.106	0.942	93.434	56.249	1.8	202.2	205.6	184.9	2.2	3.3	1.6	1.8	2.6	211	195.8	158.2	233.4	199.1	176.3	258.6	179.1	166	2.1	2.9	1.7	3.6	3.2	3	1812.12	2044.01	2973.55	243230	225674	182335	269018	229483	203216	298079	206436
[K].LFGTSGQKTK.[I]	1xBiotin [K]	3	60	P00533-1	P00533-1 [480-489]	P00533-1 1xBiotin [K]	epidermal growth factor receptor [OS=Homo sapiens]	1	1292.67	11.906	1.305	1.223	14.21	47.329	12.1	138.6	176.9	254.6	12.4	5.4	11.2	12.2	11.9	132.9	137	166.9	217.7	174.8	174.7	251.6	189	266.3	16	12.3	10.2	5.4	5.3	4.6	112285	122709	120000	1.33684e+06	1.378e+06	1.6787e+06	2.19032e+06	1.75867e+06	1.75691e+06	2.53075e+06	1.90103e+06
[R].QQIMQLKIMTNR.[L]	1xBiotin [K7]; 2xOxidation [M4; M9]	1	14	P35052	P35052 [455-466]	P35052 1xBiotin [K461]	Glypican-1 [OS=Homo sapiens]	1	1761.88	8.736	1.222	2.529	10.373	34.279	10.5	91.6	135.2	342	13	7.6	7.7	13.1	9.4	250	82.1	65.3	305.6	61.5	121.2	353.3	168.4	306.5	11.7	12.3	8.8	6	10.3	6.8	2275.33	3876.38	2774.49	73787.2	24238.2	19268.9	90200.4	18155.5	35768.5	104275	49711.7
[K].QHTVTTTTKGENFTETDVK.[M]	1xBiotin [K9]	2	10	P04156-1	P04156-1 [186-204]	P04156-1 1xBiotin [K194]	Major prion protein [OS=Homo sapiens]	1	2363.12	17.169	1.225	0.892	20.568	26.184	10.1	172.7	211.3	188.5	10.3	7.2	7.2	10.9	10.3	160.3	177.1	182.2	201	216.7	223.2	148.6	215.6	193.4	12.4	8.7	10.5	7.4	7	7.4	2031.36	3103.45	2925.57	45458.3	50228.7	51669.1	57001	61459.1	63275.5	42134.8	61144.5
[R].QQIMQLKIMTNR.[L]	1xBiotin [K7]; 1xOxidation [M]	1	24	P35052	P35052 [455-466]	P35052 1xBiotin [K461]	Glypican-1 [OS=Homo sapiens]	1	1745.89	23.168	1.144	0.884	22.775	24.531	7.9	183.5	209.9	180.1	9.2	9.4	7.6	10	7	176.3	183.7	168.4	201.6	164.6	250.4	172.9	260.6	145.4	8.1	8.8	9.8	5.2	10.6	9	2918.19	3822.98	2676	67609.8	70449.6	64598.2	77315	63120.7	96043.9	66335.4	99970.2
[K].SFVVTSVVAFPTDSKTVQR.[T]	1xBiotin [K15]	1	21	Q9Y5Y6	Q9Y5Y6 [190-208]	Q9Y5Y6 1xBiotin [K204]	suppressor of tumorigenicity 14 protein [OS=Homo sapiens]	1	2294.18	20.103	0.988	0.957	24.159	20.589	8	209.4	206.9	156	9.9	9.8	7.3	8.1	11.3	135.8	210.6	227.7	130	264	208.1	156.9	252.5	134.5	10.8	5.4	10	10.5	6.5	9.8	2542.51	2809.88	3931.41	47123.7	73108.7	79032.3	45114.3	91646.1	72244.7	54458.2	87660.2
[K].NYGKTILTK.[E]	1xBiotin [K4]	2	5	P78536-1	P78536-1 [389-397]	P78536-1 1xBiotin [K392]	Disintegrin and metalloproteinase domain-containing protein 17 [OS=Homo sapiens]	1	1263.68	3.185	1	2.712	5.217	13.004	34.7	110.6	110.6	299.8	21.2	23	30.9	34.5	39.1	96.6	109.9	129.9	109.9	97.4	118.4	290.9	307.7	297.9	14.2	24.7	21.1	22.9	31.6	22.4	3717.42	4154.2	4709.29	11629.8	13231.8	15634.1	13225.5	11725.3	14255.8	35024.2	37044.9
[R].TNEGILKVVK.[A]	1xBiotin [K7]	1	10	P32926	P32926 [324-333]	P32926 1xBiotin [K330]	Desmoglein-3 [OS=Homo sapiens]	1	1326.74	3.597	1.241	2.269	5.878	12.974	26.1	93.8	116.4	321	19.7	23	36.5	20.7	25.4	89.2	91.3	128.1	144.6	112.3	113.3	323.6	254.7	312.5	19.1	19.2	32.6	19.6	22.4	34.9	3878.29	2203.12	2695.54	9468	9696.52	13608	15358.1	11921.2	12035.8	34367.4	27053.1
[R].SLKSFVVTSVVAFPTDSK.[T]	1xBiotin [K3]	1	20	Q9Y5Y6	Q9Y5Y6 [187-204]	Q9Y5Y6 1xBiotin [K189]	suppressor of tumorigenicity 14 protein [OS=Homo sapiens]	1	2138.12	26.081	0.57	0.596	15.266	12.792	11.9	295.7	168.6	100.5	11	12.3	11.7	11	8.8	273.3	254	304.5	14.8	335.8	155.8	92.9	184.8	88.3	12.7	9.3	10.2	6.3	11.4	14.4	3262.6	3068.15	2450.27	76374.4	70959.8	85093	4127.47	93837.9	43531.8	25946.3	51647.6
[K].KLFGTSGQK.[T]	1xBiotin [K1]	3	8	P00533-1	P00533-1 [479-487]	P00533-1 1xBiotin [K479]	epidermal growth factor receptor [OS=Homo sapiens]	1	1191.62	3.26	1.399	0.921	4.972	12.007	42.9	139.7	195.4	167.8	40.3	14	40	43	46.6	105.9	140.1	192.4	196	170.8	202.6	168.3	157.6	186.7	40.4	40.8	33.3	2.8	18.5	14	33222.8	35732.1	38741.7	88044.9	116478	159935	162930	141968	168434	139870	131013
[R].DWVVAPISVPENGKGPFPQR.[L]	1xBiotin [K14]	2	15	P22223-1	P22223-1 [108-127]	P22223-1 1xBiotin [K121]	Cadherin-3 [OS=Homo sapiens]	1	2419.22	19.693	0.765	1.089	17.253	12.005	13	255.2	195.3	115.7	11.3	9.6	10.5	12.9	13.4	124.3	253.5	285.7	61.5	280.4	193.9	76.1	305.4	114.9	11.2	14.9	10.7	9.6	13	8.1	2358.22	2881.27	3003.96	27814.2	56739.8	63955.9	13760	62762.1	43413.6	17033.1	68369.7
[R].KFGDPVVQSDMK.[H]	1xBiotin [K1]; 1xOxidation [M11]	2	10	P0DMV8	P0DMV8 [77-88]	P0DMV8 1xBiotin [K77]	heat shock 70 kDa protein 1A [OS=Homo sapiens]	1	1592.74	6.295	1.228	1.124	9.006	11.83	21.8	149.7	183.9	206.7	20.4	17.5	19.7	29.1	21.9	175.9	150.2	124.3	271.2	127.5	184.5	226.7	147.6	207.4	14.5	29.2	20.5	17.5	18.2	14	2471.85	3648.41	2739.44	22023	18806.8	15559.2	33959	15970.3	23104	28384.5	18486.6
[K].VDKKIVPR.[D]	2xBiotin [K3; K4]	1	13	EGFR-fabID	EGFR-fabID [232-239]	EGFR-fabID 2xBiotin [K234; K235]	Heavy	2	1406.76	12.976	1.038	1.072	12.168	11.735	12.4	191.9	199.2	170.4	11.1	14.9	17	13.1	12.2	118.5	202.9	221	128.6	210.7	211.7	165.8	226.9	180.2	19.8	10.6	11.7	14.1	15.8	19.3	3411.94	2626.04	2453.66	23750.6	40657	44273.2	25775.4	42209.3	42427.3	33217.2	45469.7
[K].EDAMKTK.[T]	1xBiotin [K5]; 1xOxidation [M4]	3	12	Q29983	Q29983 [171-177]	Q29983 1xBiotin [K175]	MHC class I polypeptide-related sequence A [OS=Homo sapiens]	1	1064.48	16.651	1.213	0.825	18.158	11.669	9.7	178.1	230.2	155.9	11.6	14.6	10	9	14.2	149.7	183.3	209.5	136.2	236.9	254	160.4	209.5	148.7	14	11.9	8.2	12.7	15	16.7	2324.42	2092.82	3309.34	34847.6	42644.1	48749.6	31691.4	55133.1	59118.4	37326.2	48752.2
[R].SRPVINIQKTITVTPNR.[I]	1xBiotin [K9]	8	10	P23229-1	P23229-1 [503-519]	P23229-1 1xBiotin [K511]	integrin alpha-6 [OS=Homo sapiens]	1	2163.21	2.373	0.874	5.034	2.583	11.587	37.2	81.3	75.8	346.5	29.3	29.9	35.7	22.2	37	77.2	87.9	78	72.7	63.6	76.8	320.2	332.4	427.6	16.6	33.1	28.1	38.3	23.9	28.7	3731.23	2319.75	3873.86	8069.55	9193.27	8155.95	7601.2	6651.62	8030.42	33482.1	34752.8
[R].QQIMQLKIMTNR.[L]	1xBiotin [K7]	1	16	P35052	P35052 [455-466]	P35052 1xBiotin [K461]	Glypican-1 [OS=Homo sapiens]	1	1729.89	11.726	1.043	0.881	13.7	9.996	18.4	215.7	225	107.6	16.4	16.9	16	19	19.8	35.9	222.7	380.7	48.4	281	232.4	111.2	247.4	94	11.6	17	17	9.4	17.4	19	3080.15	3653.39	3804.43	6912.56	42840.3	73236	9304.21	54053.3	44695.6	21381.8	47594
[R].GHDQYAYDGKDYIALNEDLR.[S]	1xBiotin [K10]	1	5	P01889	P01889 [136-155]	P01889 1xBiotin [K145]	HLA class I histocompatibility antigen, B-7 alpha chain [OS=Homo sapiens]	1	2582.16	5.686	0.825	1.737	3.818	9.594	38.1	140.3	137.5	238.8	24.4	20.8	18.6	39	42.4	129.2	143.3	241.1	64.7	198.8	140.5	134.8	244	244.3	24.9	52.1	20.7	14.8	21.2	25.5	2847.57	5960.15	6483.6	19751	21919.9	36864.3	9897.7	30404.6	21491.9	20616.7	37320.7
[K].EDAMKTK.[T]	1xBiotin [K5]	3	9	Q29983	Q29983 [171-177]	Q29983 1xBiotin [K175]	MHC class I polypeptide-related sequence A [OS=Homo sapiens]	1	1048.48	15.769	1.062	0.494	23.466	8.819	13.3	209.2	300.7	61.2	8.4	7.2	12.3	15.7	15.3	7.6	241.6	375.7	8	387.6	347.3	66.9	191.6	70.7	16.5	9.7	8	9.5	7.6	8.3	3099.21	3934.79	3848.01	1900.19	60681	94350.4	2018.61	97342.1	87227.2	16800.2	48128.3
[R].KFSLFAER.[K]	1xBiotin [K1]	8	10	P23229-1	P23229-1 [953-960]	P23229-1 1xBiotin [K953]	integrin alpha-6 [OS=Homo sapiens]	1	1223.62	3.571	1.063	0.959	3.923	8.657	44.7	152.8	177.1	171	38.2	16.2	11.2	46.4	49.9	144.2	178.3	158.4	152.4	189.5	183.5	177.2	181.8	131.7	39.6	63.1	38.9	15.2	16.8	22	2374.83	9802.44	10559.3	30500.8	37703.3	33488.7	32227.9	40080	38816	37469.6	38444.8
[R].VKWPNDLYLNDRK.[L]	1xBiotin [K2]	2	15	AGIA-fabID; EGFR-fabID	AGIA-fabID [397-409]; EGFR-fabID [417-429]	AGIA-fabID 1xBiotin [K398]; EGFR-fabID 1xBiotin [K418]	Heavy Heavy	2	1886.96	10.119	0.926	1.019	4.671	8.408	18	200.9	186	135.8	39.8	19.4	17.6	13.2	21.6	133.7	200	196.3	127.4	182.5	181.8	129.8	260.9	132.7	38.9	15	86.5	19	15.4	27.6	2920.8	2194.38	3586.86	22205.1	33214.8	32592	21149.9	30301.9	30184.5	21550.9	43326.7
[K].ITITNDKGR.[L]	1xBiotin [K7]	6	3	P11142-1; P0DMV8	P11142-1 [501-509]; P0DMV8 [501-509]	P11142-1 1xBiotin [K507]; P0DMV8 1xBiotin [K507]	Heat shock cognate 71 kDa protein [OS=Homo sapiens] heat shock 70 kDa protein 1A [OS=Homo sapiens]	1	1243.65	0.937	1.223	0.945	8.149	8.372	120.5	130.2	159.2	150.4	21.7	18	192.6	106.8	119.3	128.8	100.1	133.4	202.6	122.4	157.5	148.8	80.3	193.9	10.4	24.9	21.5	16	23.1	17.8	32115.2	17804.8	19882.8	21482	16686.5	22234.6	33783	20415.5	26259.6	24804.4	13382.7
[R].SNDPKSQNHPGWLMR.[G]	1xBiotin [K5]; 1xOxidation [M14]	2	7	P06213-1	P06213-1 [567-581]	P06213-1 1xBiotin [K571]	insulin receptor [OS=Homo sapiens]	1	2008.91	4.626	1.311	1.055	9.231	7.978	36	141.7	185.7	192.2	18.9	25.5	36.3	24.3	36.4	168.2	142.9	114.4	226.1	141.2	187.3	238.6	156.7	193.8	24.5	16.5	19	18.2	29.9	25.7	4064.53	2714	4068.82	18824.1	15994.6	12800.7	25306.1	15799.5	20963.6	26704.3	17537.6
[R].KTVTAMDVVYALK.[R]	1xBiotin [K1]; 1xOxidation [M6]	1	12	P62805	P62805 [80-92]	P62805 1xBiotin [K80]	histone H4 [OS=Homo sapiens]	1	1680.87	5.172	0.937	1.468	6.078	7.952	31.8	176	137	201.1	27.3	26.8	30.6	25.9	39.5	169.3	179.2	133.9	131.8	125.4	220.9	193.5	209.8	185.8	36.3	26.2	18.1	26.4	25.8	21.4	3183.24	2692.8	4111.16	17615.9	18645.1	13926.1	13714.9	13048	22984	20129.8	21830.1
[K].SYGKNIDSK.[L]	1xBiotin [K4]	1	5	O15031	O15031 [744-752]	O15031 1xBiotin [K747]	Plexin-B2 [OS=Homo sapiens]	1	1237.59	7.359	1.125	0.904	6.412	7.733	22.7	167	174.4	184.7	27.2	23.9	25.6	14.2	23.2	171.6	154.5	170.6	173.7	178.2	214	188.7	143.9	193.4	13.8	36	27.8	16.9	29.5	24.4	3566.36	1972.27	3226.65	23887.4	21497	23743.8	24176	24795.3	29778.8	26256.8	20031.3
[K].GEYVGKVFR.[V]	1xBiotin [K6]	2	7	P33151	P33151 [86-94]	P33151 1xBiotin [K91]	Cadherin-5 [OS=Homo sapiens]	1	1280.65	5.662	1.203	1.158	7.225	7.391	23.1	138.5	154.6	229.5	23.3	31.1	29.8	22	23.1	112.6	138.3	168.9	203.2	154.1	154.3	229.9	178.6	229.1	21.3	24	23.2	31	32.6	24	3555.87	2623.95	2751.69	13422.2	16486.8	20133.5	24222.3	18377	18396.7	27415.1	21287.8
[R].SKYKPTPIPIK.[V]	1xBiotin [K2]	1	14	Q14126	Q14126 [366-376]	Q14126 1xBiotin [K367]	Desmoglein-2 [OS=Homo sapiens]	1	1497.85	1.908	1.65	0.998	2.501	7.296	56.1	104.9	173	172.7	69.2	24.2	44.1	55.7	69.9	84.2	104.1	156.3	171.7	159	178.9	171.4	151.6	194.3	73.5	68.7	55.2	10.7	24	26.6	15516.9	19585	24597	29603.6	36612	54984.4	60395.4	55910.6	62931	60293.9	53328.5
[R].LAHYNKR.[S]	1xBiotin [K6]	16	10	Q16778; O60814	Q16778 [81-87]; O60814 [81-87]	Q16778 1xBiotin [K86]; O60814 1xBiotin [K86]	Histone H2B type 2-E [OS=Homo sapiens] Histone H2B type 1-K [OS=Homo sapiens]	1	1127.58	8.045	1.049	0.875	7.539	7.251	22.4	179.8	187.4	164	24.9	21.6	10.9	23.3	30.4	141.3	187.2	190.9	200.2	184.6	195.1	170.7	133.2	183.7	34	25.9	18.4	25.3	22.3	22.5	2588.15	5524.54	7221.99	33550.3	44445	45317	47529.8	43815	46313.9	40524.4	31611.9
[R].TDKGDLSLR.[C]	1xBiotin [K3]	1	10	P09758	P09758 [136-144]	P09758 1xBiotin [K138]	Tumor-associated calcium signal transducer 2 [OS=Homo sapiens]	1	1230.61	1.184	1.021	1.709	1.674	6.279	91.6	108.5	110.8	188.5	66.3	34.2	109.3	79.6	87.6	83	103.8	137.1	139.3	106	89.3	180.3	160.9	238.1	63.4	77.7	53.3	20.6	37.9	32.7	14819.1	10795.5	11887.2	11263.9	14080.3	18588.5	18896	14377.9	12112.6	24451	21826.9
[K].NKAEFHQSVISR.[Y]	1xBiotin [K2]	1	2	P32926	P32926 [351-362]	P32926 1xBiotin [K352]	Desmoglein-3 [OS=Homo sapiens]	1	1641.82	3.758	0.997	1.477	3.591	6.232	37.3	140.1	137.7	206.9	44.8	33.2	50.3	31.9	36.4	160.9	126.2	136.9	171.2	125.9	134.6	185.9	202.2	221.5	43.8	47.7	27.5	36.9	32.4	27.8	3843.93	2441.02	2784.72	12292.9	9647.09	10464.9	13084.5	9618.99	10287.6	14204.6	15454.1
[K].VLKQVHPDTGISSK.[A]	1xBiotin [K3]	16	27	Q16778; O60814	Q16778 [45-58]; O60814 [45-58]	Q16778 1xBiotin [K47]; O60814 1xBiotin [K47]	Histone H2B type 2-E [OS=Homo sapiens] Histone H2B type 1-K [OS=Homo sapiens]	1	1734.92	6.517	0.883	0.702	5.478	6.05	31.9	207.6	183.3	128.3	27.7	21.2	25.8	33.2	33.6	122.9	216.6	274.7	152.9	192.1	191.3	107.3	133.9	151.2	28.9	39.4	27.9	22	22.1	24.2	22583.2	29116.9	29438.1	107631	189749	240603	133903	168230	167529	93996.9	117261
[R].KGLDFEAK.[N]	1xBiotin [K1]	2	3	P22223-1	P22223-1 [394-401]	P22223-1 1xBiotin [K394]	Cadherin-3 [OS=Homo sapiens]	1	1133.57	7.199	1.227	0.958	8.619	5.732	20.3	157.5	193.3	170.9	22.4	35.6	20.5	33.3	18.7	134.6	159.6	159	195.1	168	195.4	211.6	172.4	161	16.1	37.7	22.6	35.9	21.6	36.9	2183.88	3543	1989.28	14321.4	16977.5	16909.9	20749.7	17867.9	20784.2	22507.5	18342.6
[R].MSAPKNAR.[T]	1xBiotin [K5]; 1xOxidation [M1]	1	9	P09758	P09758 [80-87]	P09758 1xBiotin [K84]	Tumor-associated calcium signal transducer 2 [OS=Homo sapiens]	1	1116.53	0.91	0.928	1.382	0.958	5.517	115.2	104.8	91.8	162.8	95.9	29.5	250.6	100.6	61.6	132.2	91.5	62.1	170.4	57.6	80.2	168.9	79.6	142.2	134	83.8	61.1	85.7	25.8	12.1	40793.1	16380.3	10022.1	21512.4	14900.9	10105.1	27736.1	9377.25	13062	27502.8	12956.6
[R].KSSTPEEVK.[K]	1xBiotin [K1]	1	4	P23528	P23528 [22-30]	P23528 1xBiotin [K22]	Cofilin-1 [OS=Homo sapiens]	1	1230.6	1.868	1.153	0.979	4.306	5.33	75.3	140.7	162.3	160.7	37.7	23.3	66.3	28.7	81.8	119.4	123.9	149.8	142.8	133.8	184.5	141.4	107.2	180.6	122.7	33.2	30	20.5	113.4	20.1	7494.43	3240.53	9246.18	13497.4	14002.8	16930.6	16148.8	15131.2	20855.1	15986.2	12123
[K].FHGTVKAENGK.[L]	1xBiotin [K6]	2	6	P04406-1	P04406-1 [56-66]	P04406-1 1xBiotin [K61]	glyceraldehyde-3-phosphate dehydrogenase [OS=Homo sapiens]	1	1413.69	2.248	1.128	0.694	1.81	5.273	62.9	141.3	159.4	115.1	98.6	22.7	122.2	62.3	25.8	140	121.1	171.9	183.1	155.4	157.9	114	90.7	127.1	101.2	97.6	68.5	24.1	22.5	14.7	16082.9	8195.37	3391.85	18421.3	15929	22618.1	24086.8	20442.2	20779.4	15002.7	11938.7
[R].KLAGILVEMTGK.[T]	1xBiotin [K1]; 1xOxidation [M9]	2	243	AGIA-fabID; EGFR-fabID	AGIA-fabID [409-420]; EGFR-fabID [429-440]	AGIA-fabID 1xBiotin [K409]; EGFR-fabID 1xBiotin [K429]	Heavy Heavy	1	1501.81	3.722	1.08	1.094	3.996	5.203	39.1	149.3	161.1	176.3	40.3	33.9	58.5	33.9	27.5	195.3	129.6	102.3	260.7	104.4	139.9	251.4	153	126.9	48.4	35	28.5	46.4	28.8	29.4	843185	489032	396249	2.81503e+06	1.86751e+06	1.47497e+06	3.75826e+06	1.50427e+06	2.01628e+06	3.62359e+06	2.20602e+06
[R].VKWPNDLYLNDR.[K]	1xBiotin [K2]	2	130	AGIA-fabID; EGFR-fabID	AGIA-fabID [397-408]; EGFR-fabID [417-428]	AGIA-fabID 1xBiotin [K398]; EGFR-fabID 1xBiotin [K418]	Heavy Heavy	1	1758.86	6.654	0.875	1.024	5.409	5.195	25.1	186.6	163.2	167.2	30.2	27.7	25.2	25.7	29.7	190.9	197.1	167.5	167	168.2	162.7	171.1	175.4	136.7	34.9	30.9	28.6	28.4	33.8	26.4	137321	140134	162092	1.04137e+06	1.07501e+06	913680	911135	917497	887288	933102	956546
[R].YQKSTELLIR.[K]	1xBiotin [K3]	5	10	P84243	P84243 [55-64]	P84243 1xBiotin [K57]	histone H3.3 [OS=Homo sapiens]	1	1476.79	2.412	1.083	0.801	3.388	5.159	54.2	164.8	168.4	134.9	51.6	26.1	73.4	52.4	52.3	126.2	159.2	165.5	179.2	162.2	162.7	181.5	130.3	129.8	49.8	47.9	52.4	11.6	25.3	38.1	15840.9	11298.9	11294	27240.4	34368.3	35728.1	38684.3	35004.2	35111.9	39177.1	28129.9
[R].KESYSVYVYK.[V]	1xBiotin [K1]	10	11	O60814	O60814 [35-44]	O60814 1xBiotin [K35]	Histone H2B type 1-K [OS=Homo sapiens]	1	1491.72	5.755	0.97	0.721	5.505	5.11	33.1	190.4	184.7	134	33.5	24.3	17.1	59.8	33.4	108.7	192.4	222.7	190.2	178.5	186.6	99.7	137.1	135.4	22.4	83.4	33.9	19.5	24.6	54.6	2232.13	7809.61	4369.54	14209.6	25148.3	29102.5	24864.7	23332.8	24391.7	13028.2	17922.4
[K].GVSKAVEHINK.[T]	1xBiotin [K4]	1	3	P06733-1	P06733-1 [61-71]	P06733-1 1xBiotin [K64]	alpha-enolase [OS=Homo sapiens]	1	1407.74	5.997	1.024	0.586	6.949	4.97	31.2	218.6	195.1	114.3	25.6	15.2	15.6	40.4	50.3	16.8	282.6	301.8	17.7	252.2	309	24.2	175.9	147.8	15.9	44.5	33.1	17.1	35.4	19.7	1815.87	4714.12	5870.44	1959.05	32973.5	35204.3	2065.19	29426.9	36051.5	2820.36	20521.4
[R].LKGIVPLAK.[V]	1xBiotin [K2]	1	2	P30101	P30101 [74-82]	P30101 1xBiotin [K75]	Protein disulfide-isomerase A3 [OS=Homo sapiens]	1	1164.72	4.562	1.183	0.894	8.011	4.885	35.1	160	189.2	160.8	22	32.9	23.4	34.3	53.1	112.3	156.2	181.2	184.8	190.2	170.7	181.8	157.1	152.6	21.5	64.1	21.3	20.5	32.2	42.7	2626.12	3837.54	5953.45	12581.6	17505.8	20304.1	20706.7	21308	19130.7	20367.1	17602.2
[K].KELLLPGNNR.[K]	1xBiotin [K1]	1	1	P05362	P05362 [67-76]	P05362 1xBiotin [K67]	Intercellular adhesion molecule 1 [OS=Homo sapiens]	1	1379.75	2.368	1.464	1.053	4.767	4.872	37.8	124.2	181.9	191.5	38.2	26.5	60.7	29.7	39.8	143.7	131	62.6	161.6	204.2	191.8	105.5	201.9	232.5	62.8	29.9	40.2	27.9	47.7	26.5	3971.27	1943.56	2604.25	9403.96	8569.46	4095.11	10569.3	13362.2	12548.3	6903.25	13207.9
[-].MSILKIHAR.[E]	1xBiotin [K5]; 1xMet-loss+Acetyl [N-Term]	1	7	P06733-1	P06733-1 [1-9]	P06733-1 1xBiotin [K5]; 1xMet-loss+Acetyl [N-Term]	alpha-enolase [OS=Homo sapiens]	1	1205.68	3.889	0.956	0.839	3.802	4.775	47.5	173.8	166.1	139.5	43.9	29.2	37.7	47.7	46.6	170.5	185.3	164.2	189.2	155.2	163	134.8	141.2	136.8	40.8	48	43.1	28.7	27.5	39.6	11493.8	14521.1	14198.3	51959.1	56465.3	50036.2	57640.5	47294.5	49670.1	41076.7	43005.7
[K].AEMNGSKLGR.[R]	1xBiotin [K7]; 1xOxidation [M3]	1	5	P16422	P16422 [71-80]	P16422 1xBiotin [K77]	Epithelial cell adhesion molecule [OS=Homo sapiens]	1	1304.61	3.5	1.178	1.037	3.897	4.76	38.2	120.9	142.5	228.8	38.2	31.3	35.6	48.7	29.7	183.6	112.6	103.9	266.8	107.7	132.7	242.4	111.6	213.1	27.6	39.7	35.6	50.9	29.2	28.7	2531.13	3461.56	2111.38	13060.9	8014.47	7390.06	18979.3	7660.48	9439.75	17245.2	7942.2
[R].LDYLSSLKVK.[G]	1xBiotin [K]	4	12	P08195	P08195 [248-257]	P08195 1xBiotin [K]	4F2 cell-surface antigen heavy chain [OS=Homo sapiens]	1	1391.76	0.855	1.476	1.462	1.195	4.72	94	80.3	121.3	177.3	89.5	37.6	97.5	88.2	113.1	83.3	80.3	90.5	133.6	125.8	89.3	186.6	184	148.2	74.8	118.7	92.9	12.9	41.3	39	14706	13311.5	17064	12571.2	12119.6	13652.6	20145.7	18982.5	13471.3	28149.5	27750.5
[K].SLVSKGTLVQTK.[G]	1xBiotin [K5]	5	8	P16401; P10412	P16401 [89-100]; P10412 [86-97]	P16401 1xBiotin [K93]; P10412 1xBiotin [K90]	Histone H1.5 [OS=Homo sapiens] Histone H1.4 [OS=Homo sapiens]	1	1486.83	3.484	1.007	0.871	3.185	4.682	49	167	157.5	147.8	47.1	31.6	13.6	50.3	52.7	139.9	171.7	183.7	161.9	185	151.2	160.5	151.9	131.7	66.8	48.4	47.5	13.7	37.1	32.5	2572.8	9550.96	10005.2	26546.5	32588.6	34855.1	30732.7	35111.3	28701.8	30454.2	28834.7
[K].TKTHYHAMHADCLQELR.[R]	1xBiotin [K2]; 1xCarbamidomethyl [C12]; 1xOxidation [M8]	1	5	Q29983	Q29983 [176-192]	Q29983 1xBiotin [K177]	MHC class I polypeptide-related sequence A [OS=Homo sapiens]	1	2353.06	2.37	0.911	1.671	2.954	4.587	53	123.6	127.2	212.6	37.2	46.4	42.4	50.8	50.9	242	118.5	100.6	157.8	91.6	121.9	271.5	105.9	203.8	57.7	35.7	31	45.7	44.4	27.7	2954.41	3533.76	3542.56	16847.8	8248.51	7002.61	10986.2	6376.29	8487.16	18898.7	7371.75
[K].AKLAEQAER.[Y]	1xBiotin [K2]	6	3	P63104-1; P31947-1	P63104-1 [10-18]; P31947-1 [10-18]	P63104-1 1xBiotin [K11]; P31947-1 1xBiotin [K11]	14-3-3 protein zeta/delta [OS=Homo sapiens] 14-3-3 protein sigma [OS=Homo sapiens]	1	1241.63	1.062	0.793	5.171	0.515	4.487	94	61.3	48.6	251.4	94.5	50.2	33.4	100.7	97.5	63.6	35.5	330.3	39.9	50.6	50.4	56.7	260.6	284.8	32.9	97.9	105.7	52.1	43.8	63.5	2044.54	6158.4	5958.71	3886.8	2171.32	20193.6	2437.4	3090.46	3081.16	3465.95	15932.6
[R].IMKAQALR.[D]	1xBiotin [K3]; 1xOxidation [M2]	4	8	P07900; P08238	P07900 [613-620]; P08238 [605-612]	P07900 1xBiotin [K615]; P08238 1xBiotin [K607]	Heat shock protein HSP 90-alpha [OS=Homo sapiens] Heat shock protein HSP 90-beta [OS=Homo sapiens]	1	1172.63	2.122	1.04	1.014	1.41	4.227	60.9	128.6	133.8	135.8	101.4	39.6	22.7	85.4	58	181.3	122.5	114	223.4	85.2	127.4	129.3	86.3	160.6	158.5	96.6	55.6	38	17.4	37.7	2287.01	8595.68	5836.03	18241.6	12327.7	11474.7	22483.4	8572.83	12824.3	13014.8	8690.15
[K].AGAVEKGVPLYR.[H]	1xBiotin [K6]	2	8	P06733-1	P06733-1 [121-132]	P06733-1 1xBiotin [K126]	alpha-enolase [OS=Homo sapiens]	1	1485.79	7.125	1.007	0.84	6.945	4.127	26.1	179.2	180.5	151.5	26	36.7	20.3	25.7	27	176.6	173.3	192.4	167.2	177.9	194.6	115.9	149.4	178.7	20.6	50.2	25.6	36.2	31.4	36.8	1778.42	2252.67	2365.19	15468.4	15171.9	16851.4	14645.7	15582	17041.3	10150.9	13081.5
[K].SAAQAAAQTNSNAAGKQLR.[K]	1xBiotin [K16]	4	13	Q8NC51-1	Q8NC51-1 [53-71]	Q8NC51-1 1xBiotin [K68]	Plasminogen activator inhibitor 1 RNA-binding protein [OS=Homo sapiens]	1	2084.03	8.047	0.893	0.834	4.524	4.024	18.3	185.7	183.5	144.9	31.5	36	18	34.6	18.5	104.9	188.2	278.4	93.7	186	216.1	110.7	146.9	180.2	32	20.7	55.8	43.3	35.5	36.5	1738.3	3337.65	1787.96	10120.9	18156.7	26859.2	9037.12	17946.2	20846	10678.3	14171.8
[K].KLNVTEQEK.[I]	1xBiotin [K1]	1	6	P06733-1	P06733-1 [81-89]	P06733-1 1xBiotin [K81]	alpha-enolase [OS=Homo sapiens]	1	1314.67	2.946	1.103	0.722	3.716	4.007	54.6	160.9	177.5	128.2	47.8	31.2	82.3	53.9	18.4	129.9	158.8	175	166.5	177.5	175.2	146.9	113.6	126.5	85.3	47.2	32.6	30.8	51.2	28.3	9463.71	6201.01	2122.32	14942.4	18267.6	20130.9	19148.6	20425	20154.8	16904.5	13065.8
[R].YLENGKETLQR.[TA]	1xBiotin [K6]	57	7	Q29960; P04439	Q29960 [195-205]; P04439 [195-205]	Q29960 1xBiotin [K200]; P04439 1xBiotin [K200]	HLA class I histocompatibility antigen, Cw-16 alpha chain [OS=Homo sapiens] HLA class I histocompatibility antigen, A-3 alpha chain [OS=Homo sapiens]	1	1576.78	2.549	1.237	0.967	3.402	3.864	50.7	140.6	162.1	156.8	49.2	40.6	66.9	51	35.6	90.8	141.2	160.8	162.9	132.7	199	181.4	129.9	157.6	49.4	33.2	58.5	32.5	40.8	75.8	3609.15	2748.94	1922.69	4900.48	7618.2	8677.09	8788.59	7159.19	10737.2	9787.9	7007.14
[R].SGVSLAALKK.[A]	1xBiotin [K9]	3	2	P10412	P10412 [55-64]	P10412 1xBiotin [K63]	Histone H1.4 [OS=Homo sapiens]	1	1199.68	3.742	1.01	0.787	6.323	3.864	46.5	174.2	176	138.4	26.6	38.2	46.5	36.4	55.6	131.8	173.9	219.2	149.2	175.7	179.5	116.9	152.7	138.2	23.6	71.9	26.6	39.5	24.6	38.2	3670.17	2870.6	4392.3	10406.4	13734.3	17313.7	11779.6	13877.1	14173	9230.13	12058.3
[R].NTQIYKAQAQTDR.[E]	1xBiotin [K6]	8	11	P01889	P01889 [87-99]	P01889 1xBiotin [K92]	HLA class I histocompatibility antigen, B-7 alpha chain [OS=Homo sapiens]	1	1762.85	2.78	1.507	1.462	3.944	3.824	35.8	99.6	150	219.3	38	57.3	101.8	31.7	16.4	88.3	88.3	80.4	235.1	107.4	133	194.4	196.2	171.2	139.1	21.8	33.7	84	50.8	26.3	10986.1	3425.79	1773.78	9527.22	9524.69	8675.31	25374	11595.8	14349.7	20976.7	21173.5
[R].VQGKGYCLPEPIQLLDEEK.[I]	1xBiotin [K4]; 1xCarbamidomethyl [C7]	2	30	AGIA-fabID; EGFR-fabID	AGIA-fabID [279-297]; EGFR-fabID [299-317]	AGIA-fabID 1xBiotin [K282]; EGFR-fabID 1xBiotin [K302]	Heavy Heavy	1	2442.2	9.387	0.69	0.686	7.283	3.796	27.2	255.2	176	94.2	14.9	32.5	4.7	26.8	32.5	198.9	251.3	274	54.2	266.3	173.3	91.9	182.6	92.8	7.4	14.6	40.4	8.2	32	48.1	2381.54	13539.5	16443.6	100576	127093	138545	27423.4	134687	87644.4	46458.5	92351.6
[K].AASNVKYVMGR.[N]	1xBiotin [K6]; 1xOxidation [M9]	1	4	P32926	P32926 [419-429]	P32926 1xBiotin [K424]	Desmoglein-3 [OS=Homo sapiens]	1	1437.7	0.877	1.924	1.66	3.123	3.726	82.1	68.9	132.6	220.2	42.5	53.8	66.6	81.2	78.1	124.9	58.4	65.5	262.9	45.7	126.1	209.3	89.3	266.4	39	40.4	79.9	71.5	43.8	51.1	3030.71	3694.22	3554.29	5686.18	2658.53	2981.51	11966.2	2078.76	5737.83	9527.02	4066.09
[R].YMGKGVSK.[A]	1xBiotin [K4]; 1xOxidation [M2]	1	4	P06733-1	P06733-1 [57-64]	P06733-1 1xBiotin [K60]	alpha-enolase [OS=Homo sapiens]	1	1111.53	2.425	1.042	1.094	3.042	3.691	55.7	135.1	137	174.7	50.1	47.3	49.6	66.5	47.8	175.3	115.7	120.2	212.5	120.6	121.9	155.5	131.9	158.7	44.6	47.6	39.6	119	31	42.1	4092.22	5488.76	3947.7	14473	9553.39	9922.16	17543.1	9952.59	10061.9	12834.4	10886.4
[R].KLAGILVEMTGK.[T]	1xBiotin [K1]	2	117	AGIA-fabID; EGFR-fabID	AGIA-fabID [409-420]; EGFR-fabID [429-440]	AGIA-fabID 1xBiotin [K409]; EGFR-fabID 1xBiotin [K429]	Heavy Heavy	1	1485.82	5.184	1.056	0.718	5.196	3.668	37.6	214.2	169.9	105.9	32.7	39.6	25.2	38.6	42.8	104.9	219.7	222	110.8	250.1	174.3	102.8	179.7	108.6	31.4	43.5	33.5	22.5	49	40.6	296056	452910	502785	1.2311e+06	2.57937e+06	2.60662e+06	1.30029e+06	2.93656e+06	2.04587e+06	1.20638e+06	2.10936e+06
[R].NNELIAVGKGSSLK.[R]	1xBiotin [K9]	1	22	O00622	O00622 [195-208]	O00622 1xBiotin [K203]	Protein CYR61 [OS=Homo sapiens]	1	1655.88	5.309	1.785	0.42	7.693	3.658	27.2	144.2	259.5	109.1	30.2	29.8	7.8	28.1	32.8	123.4	149.4	171.8	272.3	220.2	268.9	113	100.5	113.7	53.5	31.3	28.6	32.1	30.9	21.5	2371.04	8588.65	10015.1	37658.3	45597.5	52427.3	83082.6	67206.6	82070.9	34485.7	30664.5
[K].KLFVGGLK.[G]	1xBiotin [K1]	1	2	Q13151	Q13151 [99-106]	Q13151 1xBiotin [K99]	Heterogeneous nuclear ribonucleoprotein A0 [OS=Homo sapiens]	1	1087.63	4.92	0.997	0.857	2.574	3.654	31.6	170.9	163.5	140	55.7	38.3	27.7	66.9	32.3	136.3	174.3	174.3	140.6	173.8	166.7	142.8	111.1	155.8	54.6	70.2	56.8	36.8	39.1	39.7	1769.1	4271.46	2059.77	8704.18	11127.2	11129.7	8979.19	11096.4	10645.6	9120.2	7094.8
[K].YLLKGEYVGK.[V]	1xBiotin [K4]	2	2	P33151	P33151 [82-91]	P33151 1xBiotin [K85]	Cadherin-5 [OS=Homo sapiens]	1	1395.73	3.963	1.403	0.584	6.249	3.635	38	150.5	211.1	136.4	33.8	30.2	33.6	39.3	82.9	142.3	155.8	170.7	257.6	218.6	180.3	141.2	150.4	26.1	35	32.1	38.2	41.4	31.3	23.4	2592.01	3033.98	6396.74	10982.1	12024	13169.3	19874.2	16864.6	13912.7	10895.6	11606.2
[K].HQPGGGKVQIVYKPVDLSK.[V]	1xBiotin [K7]	4	6	P10636-5	P10636-5 [268-286]	P10636-5 1xBiotin [K274]	Isoform Tau-C of Microtubule-associated protein tau [OS=Homo sapiens]	1	2276.22	2.788	1.094	0.683	3.77	3.614	62.1	157.5	172.3	117.6	57.8	32.6	24.1	56.3	62.1	67.1	142.7	280.7	156.1	239.2	112	61	106.6	253.7	63.5	22.3	52.4	29.5	22.6	48.3	2071.87	4848.31	5348.66	5776.46	12292.1	24179.7	13443.8	20604.1	9647.14	5254.03	9178.17
[R].AKVEFNIR.[K]	1xBiotin [K2]	4	4	Q8NC51-1	Q8NC51-1 [302-309]	Q8NC51-1 1xBiotin [K303]	Plasminogen activator inhibitor 1 RNA-binding protein [OS=Homo sapiens]	1	1202.64	4.012	1.028	0.948	2.82	3.602	39.1	154.1	158.5	150.3	55.9	42.2	27.9	46.1	41.7	116.3	164.4	184.9	128.2	177.5	169	134.6	165.6	160.3	45.5	59.6	69.2	18.3	45	46	16760.9	27675.8	25022.9	69845.3	98728.1	111031	77002.9	106603	101517	80817.6	99451.1
[R].TFQKWAAVVVPSGEEQR.[Y]	1xBiotin [K4]	32	6	P01889	P01889 [264-280]	P01889 1xBiotin [K267]	HLA class I histocompatibility antigen, B-7 alpha chain [OS=Homo sapiens]	1	2158.07	1.986	1.178	1.991	2.113	3.601	52.1	103.4	110.6	220.3	52.4	61.2	57.4	56.4	52.6	32.3	112.1	124.8	40.3	147	119.9	238.8	260.7	201.8	56.7	68.6	34.2	62.3	66.3	67.7	3354.95	3295.38	3072.51	1885.85	6544.1	7289.49	2353.6	8584.51	7003.58	13947.3	15224.4
[K].TAIGKAGYTDK.[V]	1xBiotin [K5]	2	6	P06733-1	P06733-1 [229-239]	P06733-1 1xBiotin [K233]	alpha-enolase [OS=Homo sapiens]	1	1350.67	3.949	0.965	0.615	5.634	3.584	42.6	202.1	182.5	112.2	32.4	28.2	42	46.9	58	42.7	229.1	222.6	221.1	185.8	201	45.2	123.6	158.4	35.7	63.2	23.6	44.2	25.8	31	3627.44	4049.49	5009.39	3688.13	19783.7	19221.4	19088.7	16047.6	17359.4	3901.37	10672.8
[R].KASGPPVSELITK.[A]	1xBiotin [K1]	3	9	P10412	P10412 [34-46]	P10412 1xBiotin [K34]	Histone H1.4 [OS=Homo sapiens]	1	1552.84	3.653	0.917	0.89	2.274	3.567	41.1	160.8	147.4	145.9	64.8	39.9	41	56.9	34.5	126.1	160.4	193.9	140.5	147.1	163.8	145.5	123.6	145.7	43.8	85.2	64.7	34.7	52.9	39.8	3013.87	4185.36	2538.77	9274.98	11800.3	14261.7	10335	10817.6	12046.9	10704.4	9092.26
[R].RPDQQLQGEGKIIDR.[R]	1xBiotin [K11]	4	45	Q8NC51-1	Q8NC51-1 [112-126]	Q8NC51-1 1xBiotin [K122]	Plasminogen activator inhibitor 1 RNA-binding protein [OS=Homo sapiens]	1	1979.01	5.3	0.983	0.975	3.188	3.496	35.1	159.8	157.1	153.2	50.9	43.8	17.3	37.2	42	98.9	169.2	222.8	130.4	166.4	187.2	145	163.5	162.2	32.4	58.7	53.9	17.2	49.3	46.4	29667.3	63590.6	71935	169338	289604	381288	223151	284730	320336	248175	279755
[R].HQGVMVGMGQKDSYVGDEAQSK.[R]	1xBiotin [K11]; 2xOxidation [M5; M8]	6	9	P60709	P60709 [40-61]	P60709 1xBiotin [K50]	Actin, cytoplasmic 1 [OS=Homo sapiens]	1	2609.14	2.847	1.301	0.644	1.489	3.444	45.3	115.9	208.2	114.8	82.3	33.4	24.4	58.8	47.3	167.3	120.9	97.5	217.2	79.3	217.6	119.8	113.3	140.1	146.2	65	85.9	34.8	40.7	24	2102.55	5062.21	4070.57	14410.6	10412.1	8402.79	18708.8	6827.07	18745.2	10316.3	9762.41
[R].NFLKEDAMKTK.[T]	1xBiotin [K9]; 1xOxidation [M8]	1	3	Q29983	Q29983 [167-177]	Q29983 1xBiotin [K175]	MHC class I polypeptide-related sequence A [OS=Homo sapiens]	2	1566.77	3.736	1.483	0.934	6.923	3.396	35.5	132.7	183.4	171.4	26.5	50.5	22.1	13.8	30.7	266.5	82.7	51.2	395.1	79.1	114.3	425.5	69.2	106.8	28.4	14.1	16.5	20.6	31.5	31.9	2812.14	1748.9	3902.49	33842.4	10506.6	6503.99	50177.8	10046.9	14520.4	54036.3	8794.13
[K].TKIISNR.[G]	1xBiotin [K2]	3	29	P00533-1	P00533-1 [488-494]	P00533-1 1xBiotin [K489]	epidermal growth factor receptor [OS=Homo sapiens]	1	1057.58	0.812	1.119	0.424	2.988	3.324	168.4	136.7	153	66.8	55.1	19.9	163.6	166.6	182.6	104	135.2	167	147.2	151.3	170.8	66.1	62.4	70.9	57.2	54.5	39.9	22.3	19.7	18.8	685026	697220	764439	435412	566035	698950	616043	633260	715158	276694	261016
[K].LGLKSLVSK.[G]	1xBiotin [K4]	5	12	P16401; P10412	P16401 [85-93]; P10412 [82-90]	P16401 1xBiotin [K88]; P10412 1xBiotin [K85]	Histone H1.5 [OS=Homo sapiens] Histone H1.4 [OS=Homo sapiens]	1	1170.69	3.083	1.052	0.68	3.493	3.286	54.1	166.9	175.6	117.4	50.3	35.7	23.8	58.7	69.9	88.3	194.9	181	164.7	198	190.4	112	127.3	140.1	20	75	54.5	14.5	38.7	48.3	3684.48	9095.63	10833.1	13688.7	30195.7	28044.8	25514.9	30685	29512.1	17353.1	19723.5
[-].MSSGNAKIGHPAPNFK.[A]	1xBiotin [K7]; 1xMet-loss+Acetyl [N-Term]	1	5	Q06830	Q06830 [1-16]	Q06830 1xBiotin [K7]; 1xMet-loss+Acetyl [N-Term]	peroxiredoxin-1 [OS=Homo sapiens]	1	1792.88	6.369	0.999	0.683	2.098	3.212	23.3	148.5	180.5	123.3	86	38.4	22.8	22.2	67.2	145.4	143.7	183.9	182	143.6	176.8	139.8	120.8	96.7	103.4	84.3	59	39.7	37.6	31.3	1842.14	1789.9	5418.68	11732.4	11596.1	14837.1	14690.2	11587	14263.6	11279.8	9744.87
[R].LIKDLR.[S]	1xBiotin [K3]	2	30	AGIA-fabID; EGFR-fabID	AGIA-fabID [468-473]; EGFR-fabID [488-493]	AGIA-fabID 1xBiotin [K470]; EGFR-fabID 1xBiotin [K490]	Heavy Heavy	1	983.571	3.2	1.122	0.707	3.062	3.107	50.2	160.5	170.8	123.1	55.8	39.6	46.2	48.9	50.6	134.2	156.4	174.9	196.3	159.7	166.3	112.9	119.9	134	77.9	54.3	49.6	37.3	41.9	38.6	114291	120793	124974	331672	386502	432248	484988	394642	411074	279094	296390
[K].TIAPALVSKK.[L]	1xBiotin [K]	1	10	P06733-1	P06733-1 [72-81]	P06733-1 1xBiotin [K]	alpha-enolase [OS=Homo sapiens]	1	1253.73	3.202	1.025	0.799	2.049	3.029	47.9	153.4	154.3	123.3	78.8	42.3	28	47.7	70.4	129.2	168.5	152.6	203	153.5	132.4	127.6	111.3	122.7	89.1	78.4	64.7	42.1	42.1	36.7	2714.99	4617.67	6818.51	12514.3	16326.9	14785.6	19668.5	14869.4	12830.9	12359.1	10783.4
[K].HQKITDSR.[Y]	1xBiotin [K3]	4	1	Q92859	Q92859 [882-889]	Q92859 1xBiotin [K884]	neogenin [OS=Homo sapiens]	1	1210.6	1.942	0.875	1.236	2.625	2.941	79.7	139.3	121.8	159.3	46.4	53.6	74.2	76.9	34.7	149.3	129.6	122.2	220.5	103.9	113.4	196.1	148.3	128.4	43.2	55.4	40.4	49.9	43.6	70.1	4001.58	4149.45	1873.35	8056.71	6994.22	6590.71	11895.5	5604.63	6119.38	10579.5	7998.62
[K].HAVSEGTKAVTK.[Y]	1xBiotin [K8]	16	18	Q16778; O60814	Q16778 [110-121]; O60814 [110-121]	Q16778 1xBiotin [K117]; O60814 1xBiotin [K117]	Histone H2B type 2-E [OS=Homo sapiens] Histone H2B type 1-K [OS=Homo sapiens]	1	1453.75	3.486	1.049	0.769	2.161	2.88	50.1	149.6	156.9	126.7	72.6	44	11.6	54.8	52.2	122	155.9	191.1	142.5	163.5	184.2	109.5	132	133.4	90.9	75.7	57.5	5.5	71.7	45.8	3622	17158.8	16341.4	38181.3	48766.9	59808.7	44572.2	51164.4	57642.3	34269.1	41314.4
[R].LNQLKPGLQYK.[L]	1xBiotin [K5]	7	7	Q12906-1	Q12906-1 [409-419]	Q12906-1 1xBiotin [K413]	Interleukin enhancer-binding factor 3 [OS=Homo sapiens]	0	1527.84	1.749	1.1	1.247	2.409	2.841	77.6	125.3	128.3	160	52.5	56.3	76.7	47.5	80.1	83.1	140.6	123.8	118.6	154.7	126.7	145.1	200.8	158	49.2	51.9	67.9	72.8	46.8	55.6	3963.93	2455.31	4142.99	4295.55	7269.36	6398.75	6133.39	7999.8	6551.62	7502.95	10383.5
[R].LAKYNQLLR.[I]	1xBiotin [K3]	2	3	P06733-1	P06733-1 [404-412]	P06733-1 1xBiotin [K406]	alpha-enolase [OS=Homo sapiens]	1	1344.75	3.68	0.787	1.35	1.31	2.792	48.7	249.7	65.5	132.4	56.2	47.4	49.2	74	36.1	57	272.2	252.3	66.1	44.8	251.3	60.5	193	133.8	64.8	34.2	56.8	38	47.9	67.8	2534.01	3810.71	1859.59	2936.31	14023.3	12995.8	3407.02	2309.49	12948.7	3118.82	9944.62
[R].AAINKHIK.[T]	1xBiotin [K5]	2	6	AGIA-fabID; EGFR-fabID	AGIA-fabID [260-267]; EGFR-fabID [280-287]	AGIA-fabID 1xBiotin [K264]; EGFR-fabID 1xBiotin [K284]	Heavy Heavy	1	1120.63	22.975	1.101	0.905	4.36	2.743	7.6	168.1	216.3	191.6	9	7.4	10.4	8.7	7.5	181.2	193.3	238.3	248.9	262.3	5.8	220.4	237.4	5.4	60.2	9.6	10.4	86.6	8.5	5.1	3716.26	3132.83	2690.29	64909.1	69273	85381.9	89177.5	93982.3	2086.33	78969.6	85062.5
[K].GKLDVQFSGLTKGDAVR.[D]	1xBiotin [K12]	2	3	P21333	P21333 [905-921]	P21333 1xBiotin [K916]	Filamin-A [OS=Homo sapiens]	2	2017.05	1.95	0.904	1.248	1.144	2.743	52.1	126.3	114.2	142.6	99.9	64.9	42	78.7	51.5	133.5	81.9	124.9	115.9	112.9	102.2	218.9	141	89.1	150.6	82.9	98.8	31.1	79.8	64.2	2987.92	5601.72	3668.19	9503.5	5827.7	8889.43	8249.49	8037.82	7276.58	15577.8	10034.5
[K].FASFIDKVR.[F]	1xBiotin [K7]	21	9	P35908; P04259; P02538; P05787; P13647	P35908 [189-197]; P04259 [174-182]; P02538 [174-182]; P05787 [102-110]; P13647 [179-187]	P35908 1xBiotin [K195]; P04259 1xBiotin [K180]; P02538 1xBiotin [K180]; P05787 1xBiotin [K108]; P13647 1xBiotin [K185]	Keratin, type II cytoskeletal 2 epidermal [OS=Homo sapiens] keratin, type II cytoskeletal 6B [OS=Homo sapiens] Keratin, type II cytoskeletal 6A [OS=Homo sapiens] Keratin, type II cytoskeletal 8 [OS=Homo sapiens] keratin, type II cytoskeletal 5 [OS=Homo sapiens]	1	1308.68	4.247	0.787	0.717	1.922	2.738	39.6	188.9	148.7	106.5	77.3	38.9	39.7	40.3	54.7	192.1	204.5	168.6	114.2	151.1	171.1	108.3	144.5	76	39.9	94.2	78.6	47.6	34.9	39.6	3470.94	3524.83	4782.82	16796.3	17884.1	14739.4	9990.66	13217.5	14963.1	9471.08	12636.4
[R].EDSQRPGAHLTVKK.[I]	1xBiotin [K]	4	5	P09651-1	P09651-1 [93-106]	P09651-1 1xBiotin [K]	Heterogeneous nuclear ribonucleoprotein A1 [OS=Homo sapiens]	1	1791.92	1.984	1.101	0.975	1.926	2.725	80.4	124.9	140.2	136.7	72.8	45.1	44.9	87.9	76.2	118.5	118.3	174.4	132.9	130.2	150.3	179.4	114.5	129.6	85.6	69	37.4	42	66	42.7	3108.59	6089.52	5278.78	8204.57	8190.93	12080.9	9204.39	9016.29	10411.1	12426	7932.28
[R].KGNYAER.[VI]	1xBiotin [K1]	10	9	Q16777	Q16777 [37-43]	Q16777 1xBiotin [K37]	Histone H2A type 2-C [OS=Homo sapiens]	1	1063.5	3.331	1.105	0.823	2.982	2.694	44.5	148.3	161.8	137.2	57.4	50.9	43.7	50.3	43.5	141.9	145.7	173.8	159	158.4	192	137	134.8	130.4	64.4	56.4	32.3	55.2	50	31.2	14222	16354.9	14145.6	46150.5	47380	56511.1	51690.7	51515.9	62452.2	44537.5	43833.2
[K].NIKLGIHEDSQNR.[K]	1xBiotin [K3]	2	5	P07900	P07900 [444-456]	P07900 1xBiotin [K446]	Heat shock protein HSP 90-alpha [OS=Homo sapiens]	1	1749.87	2.204	1.06	0.827	2.101	2.674	56.1	144.4	153.1	124.5	72.9	49	56.7	54.8	89.6	41.1	146.1	197.6	150	154.9	164.2	124.1	136.4	126	90.5	73.7	61.8	31.8	49.6	51	3131.79	3026.8	4949.06	2267.95	8068.86	10909.7	8281.85	8555.47	9064.03	6852.28	7533.18
[R].VNFAMNVGKAR.[G]	1xBiotin [K9]; 1xOxidation [M5]	3	2	P14618	P14618 [490-500]	P14618 1xBiotin [K498]	Pyruvate kinase PKM [OS=Homo sapiens]	1	1448.71	1.728	0.917	0.927	1.818	2.622	73.2	126.4	114.9	155.6	70.6	59.4	64.1	90.8	39.3	155.6	83.3	110.7	273.9	76.3	100.7	225	70.7	136.4	61.8	120.4	42	52	38.2	58.8	2891.05	4095.56	1771.98	7019.4	3756.55	4994.41	12357.1	3443.42	4540.97	10148.6	3190.67
[K].VKLIVLVPPSKPTVNIPSSATIGNR.[A]	1xBiotin [K2]	1	8	Q9Y624	Q9Y624 [124-148]	Q9Y624 1xBiotin [K125]	Junctional adhesion molecule A [OS=Homo sapiens]	1	2826.63	8.305	0.592	0.619	2.871	2.616	30.6	254.2	150.5	93.2	35.7	35.6	25	30.2	35.5	250.9	233.4	266.9	37.6	257	148.6	92	136.4	29.7	26.6	89.5	35.3	35.2	24.6	45.6	2264.64	2739.37	3218.85	22749.7	21161.9	24202.1	3413.43	23308.3	13471.9	8343.2	12364.9
[K].QLATKAAR.[K]	1xBiotin [K5]	4	6	P84243	P84243 [20-27]	P84243 1xBiotin [K24]	histone H3.3 [OS=Homo sapiens]	1	1084.59	4.503	1.162	0.394	2.426	2.554	38.1	171.4	199.2	78.5	82.1	30.8	39.2	29.5	40.4	118.1	176.6	225.8	162.7	205.3	212.5	80.9	35.5	176.2	89.1	84.6	27.2	26.8	37.8	31.7	3499.11	2629.99	3600.65	10534.6	15756.9	20147	14511.4	18315.8	18959	7220.87	3170.01
[R].KDLYANTVLSGGTTMYPGIADR.[M]	1xBiotin [K1]; 1xOxidation [M15]	2	7	P60709	P60709 [291-312]	P60709 1xBiotin [K291]	Actin, cytoplasmic 1 [OS=Homo sapiens]	1	2585.24	5.067	1.031	0.658	5.277	2.534	49.8	160.8	190.8	125.6	36.2	36.9	51.6	29	50.5	261.2	162.3	163.1	197.9	167.3	193.5	28.6	127.4	137	37.8	36.7	28.2	37.4	36.6	54	3941.81	2217.63	3863.43	19971.2	12406.8	12471.1	15129.1	12795.1	14796.9	2186.32	9742.26
[K].KQAGPASVPLR.[T]	1xBiotin [K1]	1	8	P30101	P30101 [130-140]	P30101 1xBiotin [K130]	Protein disulfide-isomerase A3 [OS=Homo sapiens]	1	1349.74	2.63	1.009	0.701	2.937	2.526	70.3	155.7	157.2	113	59	44.7	41.3	69.3	74.6	108.7	153.7	214.4	155.1	152	188.2	106.6	128.8	111.5	42.9	64.1	58.2	32.8	53.5	44.1	3407.04	5717.14	6152.73	8959.84	12669.1	17680.6	12788.5	12535.5	15513.8	8792.31	10623.3
[K].KALAAAGYDVEK.[N]	1xBiotin [K1]	5	10	P10412	P10412 [64-75]	P10412 1xBiotin [K64]	Histone H1.4 [OS=Homo sapiens]	1	1461.74	3.158	0.958	0.657	3.525	2.518	56.6	176.2	168.8	120.5	38.2	39.7	32.1	59.6	59.5	142	188.1	185.2	132.9	196.5	177.5	87.3	126.6	128.5	40.2	71.9	37.7	41.8	51.1	41.8	3091.84	5745.22	5736.26	13691.5	18140.9	17863.1	12816.9	18948.7	17114.8	8416.9	12214
[K].AVAASKER.[NS]	1xBiotin [K6]	4	6	P16401; P10412	P16401 [50-57]; P10412 [47-54]	P16401 1xBiotin [K55]; P10412 1xBiotin [K52]	Histone H1.5 [OS=Homo sapiens] Histone H1.4 [OS=Homo sapiens]	1	1057.55	9.046	0.994	0.733	1.628	2.497	15.9	161.2	160.2	117.3	98.4	47	12.1	15.7	27.1	109.2	159.1	182.7	154.7	168.9	158.2	95.8	115.9	153.8	97.1	91.3	109.6	25.6	46.4	76.8	1765.06	2291.26	3968.63	15967.4	23278.6	26729.2	22622.4	24706.2	23134.2	14016.1	16946.5
[-].MKIEEVK.[S]	1xBiotin [K2]; 1xOxidation [M1]	2	2	Q9Y265	Q9Y265 [1-7]	Q9Y265 1xBiotin [K2]	RuvB-like 1 [OS=Homo sapiens]	1	1118.56	1.465	0.974	1.393	1.789	2.444	76.5	112	109.1	151.9	88.3	62.2	72.2	75.5	81.7	111.8	110.6	109.3	179.1	103.3	107.7	157.6	144.4	150	87.2	95.6	57.8	23.3	61.4	71.2	8704.18	9107.13	9857.8	13486.7	13339.1	13184.1	21602	12462.7	12986.6	19002.8	17409.9
[R].GHEKFGSCQQGVAATFTK.[D]	1xBiotin [K4]; 1xCarbamidomethyl [C8]	8	1	P23229-1	P23229-1 [181-198]	P23229-1 1xBiotin [K184]	integrin alpha-6 [OS=Homo sapiens]	1	2179.01	0.591	1.43	2.269	0.843	2.428	94.3	56.8	81.2	184.2	96.3	87.2	89.2	157.6	83.6	53.7	55.5	49.4	70.6	76.8	90.8	140.2	174.1	215.8	43.7	188.7	91	48.1	88.9	82.4	3864.54	6829.62	3624.05	2327.28	2403.91	2142.46	3060.29	3327.11	3937.14	6075.32	7548.03
[R].SGKYDLDFK.[S]	1xBiotin [K3]	2	16	P06733-1	P06733-1 [254-262]	P06733-1 1xBiotin [K256]	alpha-enolase [OS=Homo sapiens]	1	1298.61	3.573	1.024	0.987	2.155	2.399	39.9	142.5	145.9	144	67.7	60	40.5	40.5	40.1	97.7	144.5	174.5	133.1	148	157.8	160	146.1	128.7	77.8	68.7	56.6	59.3	65.1	60.9	10591.8	10583.1	10500.9	25574.3	37817.7	45659.5	34814.7	38722.5	41298.4	41871	38215.7
[R].LLLPGELAKHAVSEGTK.[A]	1xBiotin [K]	16	26	Q16778; O60814	Q16778 [101-117]; O60814 [101-117]	Q16778 1xBiotin [K]; O60814 1xBiotin [K]	Histone H2B type 2-E [OS=Homo sapiens] Histone H2B type 1-K [OS=Homo sapiens]	1	1989.08	3.637	0.941	0.474	3.307	2.361	51.6	205.5	169	80.1	55.7	38.1	42.6	51.4	68.5	154.8	218.2	204.5	145.6	217.7	168.3	67.2	110.6	79.7	37.4	55.4	65.8	27.6	37.9	46.9	22526.4	27215.9	36236.1	81935.7	115507	108265	77095.6	115221	89077.9	35556.8	58572
[R].KESYSIYVYK.[V]	1xBiotin [K1]	7	4	Q16778	Q16778 [35-44]	Q16778 1xBiotin [K35]	Histone H2B type 2-E [OS=Homo sapiens]	1	1505.73	2.439	0.844	0.926	2.014	2.358	65.1	158.7	149.8	125.9	50.4	50.2	65.8	74.3	81.9	54.6	181.3	208.4	38.6	171.1	176	75.8	143.8	162.9	41.6	57.5	87.4	52.4	57.3	69.1	3085.93	3487.64	3843.15	2561.41	8505.18	9778.7	1812.85	8029.46	8256.98	3558.13	6747.75
[K].KLEDGPKFLK.[S]	1xBiotin [K7]	3	5	P68104	P68104 [386-395]	P68104 1xBiotin [K392]	Elongation factor 1-alpha 1 [OS=Homo sapiens]	2	1400.76	1.725	0.999	0.767	1.092	2.303	83.8	133.8	133.7	102.5	101.8	44.5	13.5	91.6	91.5	100.4	146.1	158	108.5	149.4	146	57.8	112	125.5	111	136.8	111.2	51.1	48.6	41.2	2000.05	13594.2	13579	14901.1	21683.7	23446.4	16106.3	22169.3	21666.2	8576.3	16617.8
[R].IAKAVNEK.[S]	1xBiotin [K3]	2	5	P06733-1	P06733-1 [328-335]	P06733-1 1xBiotin [K330]	alpha-enolase [OS=Homo sapiens]	1	1098.6	3.969	1.095	0.674	4.549	2.282	40.6	164.8	180.5	121.3	39.7	53.1	41	46.6	34.7	137.6	182.8	166.3	182.1	169.1	190.1	122.4	130	114.1	36.5	40	50.7	53.6	58.8	43.8	2899.1	3295.36	2453.72	9739.24	12936.7	11767.5	12886.5	11971.3	13452	8661.27	9200.71
[K].GTGASGSFKLNK.[K]	1xBiotin [K]	5	6	P16401; P10412	P16401 [101-112]; P10412 [98-109]	P16401 1xBiotin [K]; P10412 1xBiotin [K]	Histone H1.5 [OS=Homo sapiens] Histone H1.4 [OS=Homo sapiens]	1	1392.69	2.522	1.091	0.635	2.6	2.281	62.6	157.8	177.5	104.1	54.6	43.5	33	81.1	69.8	76.2	176	213.4	83.1	198	213.6	56.9	116.1	135.6	32	108.6	60.9	37.6	48.6	59.5	2820.49	6922.35	5959.92	6508.79	15031.1	18223.2	7097.9	16906.1	18243.2	4860.47	9913.22
[K].YLEKYYNLK.[N]	1xBiotin [K4]	1	7	P03956	P03956 [37-45]	P03956 1xBiotin [K40]	Interstitial collagenase [OS=Homo sapiens]	1	1459.73	3.838	1.001	0.825	2.636	2.224	35.6	156.9	154.8	127.7	63.5	61.4	35.8	29.9	55	114.8	172.8	157.9	173	155.8	140.6	175.7	128.5	109.8	39.7	65.6	63.9	61.8	70	49.4	2067.95	1727.72	3175.26	6630.35	9982.45	9118.95	9989.19	8998.47	8119.97	10147.8	7421.87
[K].GQPLCVLSAMKMETVVTSPMEGTVR.[K]	1xBiotin [K11]; 1xCarbamidomethyl [C5]; 3xOxidation [M10; M12; M20]	1	464	P11498	P11498 [1134-1158]	P11498 1xBiotin [K1144]	pyruvate carboxylase, mitochondrial [OS=Homo sapiens]	1	2995.41	0.4	1.303	2.704	1.314	2.221	147	58.8	76.6	207.1	58.3	52.3	226.1	120.3	92.7	174	48.1	19.6	150.2	30.3	62.7	169.5	92.1	208.6	47.7	43.2	60.7	169.8	42.8	41.5	7.86478e+06	4.18336e+06	3.22501e+06	6.05236e+06	1.67343e+06	682680	5.22463e+06	1.05373e+06	2.17974e+06	5.89407e+06	3.20471e+06
[K].EVSTYIKK.[I]	1xBiotin [K]	3	10	P68104	P68104 [173-180]	P68104 1xBiotin [K]	Elongation factor 1-alpha 1 [OS=Homo sapiens]	1	1193.62	2.006	1.146	0.525	1.336	2.209	77.3	136.5	159.7	83.8	104.7	38	28.9	76.6	77.8	135.2	126.8	156	178.8	127.7	158.2	84	75.9	83	180.4	103.7	95.6	19.5	54.3	37.6	3442.66	9129.13	9270.41	16113.5	15114.7	18597.1	21317.2	15225.5	18857.5	10007.7	9042.58
[R].APKFTQPLQPR.[S]	1xBiotin [K3]	2	3	Q96PD2-1	Q96PD2-1 [486-496]	Q96PD2-1 1xBiotin [K488]	Discoidin, CUB and LCCL domain-containing protein 2 [OS=Homo sapiens]	1	1508.8	2.651	0.982	0.965	2.949	2.186	46	153.4	150.6	134.1	45.9	70.1	44.1	45.6	69.5	117	177.1	151.9	158.8	149.1	123	119.6	132.8	153.2	41.7	85.1	45.4	70.1	46.4	69.4	2094.32	2162.6	3297.19	5551.73	8402.75	7205.28	7533.12	7073.5	5836.1	5675.15	6298.06
[R].VNHVTLSQPKIVK.[W]	1xBiotin [K10]	1	3	P61769	P61769 [102-114]	P61769 1xBiotin [K111]	Beta-2-microglobulin [OS=Homo sapiens]	1	1688.95	0.774	1.097	0.561	0.689	2.178	135.9	104.1	114.2	64.1	165.8	15.9	19	136.7	182.5	80.9	104.7	141.2	102.9	114.9	134.4	29.3	76.6	64.5	139.2	223.1	166.8	53.8	13.5	16	2476.35	17846.3	23839.4	10571.7	13675.5	18439.8	13443.3	15006	17546	3830.75	10005.1
[R].LIFAGKQLEDGR.[T]	1xBiotin [K6]	4	8	P62987	P62987 [43-54]	P62987 1xBiotin [K48]	Ubiquitin-60S ribosomal protein L40 [OS=Homo sapiens]	1	1572.82	2.178	0.832	0.742	2.433	2.163	77.7	169.2	140.8	104.5	59.5	48.3	61.2	115.4	76.5	149.8	166.7	166.9	102.9	138.7	204.7	103	158.8	36.7	58.6	30.6	84.1	59.1	38.7	47.6	3887.89	7329.5	4861.33	9516.74	10587.3	10600.2	6539.49	8812.28	13004.9	6541.8	10086.3
[K].KEMQPTHPIR.[L]	1xBiotin [K1]; 1xOxidation [M3]	5	2	P63104-1	P63104-1 [158-167]	P63104-1 1xBiotin [K158]	14-3-3 protein zeta/delta [OS=Homo sapiens]	1	1478.72	2.798	1.471	0.527	3.957	2.16	51.6	137.9	202.9	106.8	51.3	49.5	54.8	52.4	40	140.2	115.7	153.4	258.8	137.2	206.2	165.1	108.6	50	52.1	54.5	39.2	73.5	48.1	50.3	2624.57	2509.21	1913.02	6708.82	5539.03	7343.38	12386.8	6563.98	9867.45	7899.39	5195.47
[R].YVQKGEYR.[T]	1xBiotin [K4]	17	19	P16070	P16070 [155-162]	P16070 1xBiotin [K158]	CD44 antigen [OS=Homo sapiens]	1	1268.61	1.122	1.386	0.595	1.408	2.156	99.1	109	151.1	89.9	107.3	43.7	102.4	95.3	91.6	102.7	104.8	158.5	145.3	147.1	145.1	93	86	86.5	140.3	103.2	81	32.1	42	43.1	31085	28913.8	27789.3	31168.2	31811.9	48112.8	44091.4	44630.8	44034.1	28217.8	26113.7
[K].EITALAPSTMKIK.[I]	1xBiotin [K]; 1xOxidation [M10]	7	22	P60709	P60709 [316-328]	P60709 1xBiotin [K]	Actin, cytoplasmic 1 [OS=Homo sapiens]	1	1644.87	0.945	1.205	1.449	1.072	2.152	91.8	86.8	104.6	151.6	97.6	67.5	135.8	84.8	48.7	126.2	80.2	64	166.5	68.6	96.6	157.2	104.7	140.1	136.2	90.2	69.2	119.9	62.3	48.7	55216.3	34501.8	19785.8	51336	32602.6	26022.4	67689.4	27898.9	39296	63937.9	42584.3
[K].STGGKAPR.[K]	1xBiotin [K5]	5	5	P84243	P84243 [11-18]	P84243 1xBiotin [K15]	histone H3.3 [OS=Homo sapiens]	1	999.504	2.726	1.031	0.726	3.386	2.14	55.5	157.5	162.4	117.9	48	58.8	33.2	62.4	73.6	90.4	177.3	182.9	38.4	182.8	206.8	123.7	147.1	132.7	55.5	54	49.1	68.7	66.2	55.2	1796.47	3381.16	3986.99	4896.83	9602.51	9904.25	2082.13	9898.83	11197.6	6699.31	7964.37
[K].FHPLHSKIIIIK.[K]	1xBiotin [K7]	2	19	P17936	P17936 [165-176]	P17936 1xBiotin [K171]	Insulin-like growth factor-binding protein 3 [OS=Homo sapiens]	1	1671.98	2.102	0.782	0.611	2.288	2.129	54	193.3	151.1	92.3	66.1	43.2	53.8	54.3	104	113	194.5	205.4	53.2	213.8	152	92.8	105.8	89.2	66.1	70.3	66.5	43.5	79.8	41.9	24027.5	24275	46481	50504.4	86899.9	91794.2	23790.8	95557.4	67938.4	41490.7	47296.1
[R].HKMTTLTPAYHAENYSPEDNR.[F]	1xBiotin [K2]; 1xOxidation [M3]	2	9	Q6IA69	Q6IA69 [648-668]	Q6IA69 1xBiotin [K649]	glutamine-dependent NAD(+) synthetase [OS=Homo sapiens]	1	2717.21	1.043	1.55	0.629	0.664	2.115	98.4	74.4	139.4	76.6	174.8	36.2	42	105.6	82.4	110.1	62.3	60.7	163.6	94.1	116.7	103	64.1	62.6	320.1	141.8	146.3	30.3	66.5	28	4145.11	10412.9	8123.97	10860.8	6143.75	5987.73	16135.4	9282.1	11506.5	10156.6	6323.33
[R].KLLEGEECR.[MLI]	1xBiotin [K1]; 1xCarbamidomethyl [C8]	11	4	P35908; P04259; P02538; P13647	P35908 [482-490]; P04259 [467-475]; P02538 [467-475]; P13647 [472-480]	P35908 1xBiotin [K482]; P04259 1xBiotin [K467]; P02538 1xBiotin [K467]; P13647 1xBiotin [K472]	Keratin, type II cytoskeletal 2 epidermal [OS=Homo sapiens] keratin, type II cytoskeletal 6B [OS=Homo sapiens] Keratin, type II cytoskeletal 6A [OS=Homo sapiens] keratin, type II cytoskeletal 5 [OS=Homo sapiens]	1	1359.64	3.363	1.21	0.345	4.835	2.084	52.3	178	215.3	74.2	44.5	35.6	29.7	146.9	49.2	99.9	167.4	201.8	194.1	202.6	213.4	69.8	110.1	34.6	101.2	29.7	41.9	25.5	48.8	33.5	2232.32	11037.9	3699.76	7506.97	12586.1	15164.6	14591.3	15225.1	16039.7	5246.64	8275.51
[K].EFEGKTLVSVTK.[E]	1xBiotin [K5]	3	7	P07900	P07900 [535-546]	P07900 1xBiotin [K539]	Heat shock protein HSP 90-alpha [OS=Homo sapiens]	1	1563.81	2.72	0.853	1.043	1.145	2.066	42.8	141	118.7	130.5	103.7	63.2	42.4	35.4	62.6	96.2	139.5	160.3	112.5	117.5	136.7	134.2	129.1	117.3	102.6	133	74.6	25.6	118.1	62.5	3497.82	2919.91	5164.17	7942.22	11514.5	13231.4	9280.73	9694.17	11284	11072.4	10655.7
[K].AVTKAQK.[K]	1xBiotin [K4]	13	2	Q16778; O60814	Q16778 [18-24]; O60814 [18-24]	Q16778 1xBiotin [K21]; O60814 1xBiotin [K21]	Histone H2B type 2-E [OS=Homo sapiens] Histone H2B type 1-K [OS=Homo sapiens]	1	971.534	2.418	1.072	0.67	2.084	2.052	64.7	148	159.9	107.1	74.3	46.1	37.2	69.8	74.1	120.5	179.2	159.7	123.1	172.5	192.1	18.4	115.5	134.9	92.2	80.2	70.3	44.9	49.7	65.8	5466.47	10245	10879.4	17684.2	26310.1	23443.9	18076	25327.7	28195.8	2706.99	16960.7
[R].VEYAKSGR.[A]	1xBiotin [K5]	1	2	P09874	P09874 [11-18]	P09874 1xBiotin [K15]	Poly [ADP-ribose] polymerase 1 [OS=Homo sapiens]	1	1135.56	1.689	1.226	0.893	1.648	2.044	68.4	115.5	141.5	125.7	87.5	61.5	90.1	69.2	50.3	95	116.9	151.3	118.5	147.5	143.3	122.9	127.2	131.8	88.6	89.5	56.8	62.3	42.9	95.8	3919.24	3013.29	2188.87	4135.79	5088.92	6585.17	5156.4	6420.25	6237.33	5348.57	5537.6
[K].NLKLGIHEDSTNR.[R]	1xBiotin [K3]	1	1	P08238	P08238 [436-448]	P08238 1xBiotin [K438]	Heat shock protein HSP 90-beta [OS=Homo sapiens]	1	1722.86	2.852	1.113	0.628	1.979	1.979	49.4	139.2	168.2	105.1	85	53.1	18.3	72.1	51.8	134.9	145.9	205.5	177.1	150.2	176.3	111.2	99.7	110.1	19.5	89.1	94.1	19.3	69.3	55.7	1717.18	6764	4863.86	12663.3	13696.8	19293.3	16624	14096.5	16551.4	10437.4	9355.74
[R].MSAPKNAR.[T]	1xBiotin [K5]	1	9	P09758	P09758 [80-87]	P09758 1xBiotin [K84]	Tumor-associated calcium signal transducer 2 [OS=Homo sapiens]	1	1100.53	0.839	1.069	0.751	1.391	1.966	151.1	114.1	121.9	79.4	87.6	45.9	87.6	157	163.7	73.5	118.5	165.9	100.4	126.7	133.8	75.4	107.6	82.5	91.1	109.5	71.6	54.8	47.7	32.9	23179.8	41533.3	43304.2	19452.5	31354.3	43893.9	26564.1	33511.3	35390.6	19958.4	28480.9
[R].LAPVYQKLLER.[M]	1xBiotin [K7]	1	8	Q15582	Q15582 [670-680]	Q15582 1xBiotin [K676]	Transforming growth factor-beta-induced protein ig-h3 [OS=Homo sapiens]	1	1555.87	1.424	1.141	0.761	1.186	1.949	79.9	113.8	135.8	103.4	112.2	54.9	100.3	72.7	80.8	102.9	115.1	145.5	117.4	137.9	137.4	104.6	85.8	109.6	113.5	121.9	99	43.5	55.6	56.2	7363.43	5338.3	5934.94	7555.88	8450.65	10685.1	8622.03	10122.9	10088.3	7680.33	6298.98
[K].AGAHLQGGAKR.[V]	1xBiotin [K10]	2	4	P04406-1	P04406-1 [108-118]	P04406-1 1xBiotin [K117]	glyceraldehyde-3-phosphate dehydrogenase [OS=Homo sapiens]	1	1291.67	1.5	1.152	1.036	1.254	1.934	71.1	106.6	149.1	116.1	97.2	60	175.8	46.4	61	130	72.5	91.5	128	83.5	138.1	148.1	86.5	99.7	148.5	83.4	66.6	147.2	41.7	51.5	16841.1	4446.38	5846.42	12458.4	6943.85	8771.78	12268	7999.53	13235.3	14192.7	8287.01
[R].KASDVHEVR.[K]	1xBiotin [K1]	3	7	P14618	P14618 [247-255]	P14618 1xBiotin [K247]	Pyruvate kinase PKM [OS=Homo sapiens]	1	1266.63	1.419	1.215	0.631	1.901	1.893	91.7	127	150.3	99.5	79	52.5	89.7	91.2	59.7	124.2	129.4	110.1	226.3	133.7	147.1	97.3	84.4	100.8	108.6	72.5	77.4	68.7	27.6	51.4	9506.51	9662.22	6323.17	13167.2	13713.5	11663.5	23986.4	14168.3	15586	10314.7	8946.37
[K].AGDSLMVMIAMKMEHTIK.[S]	1xBiotin [K]; 3xOxidation [M8; M11; M]	1	179	Q96RQ3	Q96RQ3 [670-687]	Q96RQ3 1xBiotin [K]	Methylcrotonoyl-CoA carboxylase subunit alpha, mitochondrial [OS=Homo sapiens]	1	2280.06	0.473	1.15	1.884	0.58	1.876	128.9	61	70.1	153.5	121	65.5	362.1	75.7	74.8	209	35.8	18.6	144.9	30.9	41.2	139	58.2	90.2	88.2	56.6	71.1	234.1	38.5	31	1.31649e+06	275358	271874	759786	130169	67507.6	526887	112305	149708	505468	211567
[R].GTKVILHLK.[E]	1xBiotin [K3]	5	13	P07900; P08238	P07900 [183-191]; P08238 [178-186]	P07900 1xBiotin [K185]; P08238 1xBiotin [K180]	Heat shock protein HSP 90-alpha [OS=Homo sapiens] Heat shock protein HSP 90-beta [OS=Homo sapiens]	1	1234.73	1.483	1.23	1.029	1.71	1.865	68.1	110.5	126	134.3	82.2	78.9	79.8	67.9	64.3	95.4	110.2	112.8	155	117.4	125.6	159.5	133.8	118.7	81.9	85.5	68.6	81.3	78.7	63.6	97318.5	82754.3	78445.6	116330	134308	137517	188980	143089	153082	194413	163164
[R].TPKIVSGK.[DV]	1xBiotin [K3]	5	1	P00338-1	P00338-1 [74-81]	P00338-1 1xBiotin [K76]	L-lactate dehydrogenase A chain [OS=Homo sapiens]	1	1055.59	2.227	1.015	0.803	2.54	1.856	27.2	161.5	153.8	130.9	60.5	66.1	27.8	28	116.6	61.8	166	174.2	148.3	158.1	176.9	49	142	134.6	55	118.3	62.2	36.7	68	76.5	1859.09	1872.42	7810.89	4139.46	11118.8	11670.3	9934.89	10589.7	11848.2	3279.78	9512.36
[R].GSSIFGLAPGKAR.[D]	1xBiotin [K11]	2	4	P05187	P05187 [393-405]	P05187 1xBiotin [K403]	alkaline phosphatase, placental type [OS=Homo sapiens]	1	1486.78	1.396	1.289	0.515	1.933	1.845	95.4	127	163.7	84.2	84.7	45	55.7	106.9	112.4	78.8	156.9	142.2	125.1	183.4	186	57.3	94.4	110.4	47.7	94.9	98.4	50.4	59.8	39.5	3585.67	6887.96	7240.65	5076.94	10106.3	9164.74	8062.49	11813.7	11981.6	3689.06	6080.68
[K].FDLMYAKR.[A]	1xBiotin [K7]; 1xOxidation [M4]	12	4	P68363	P68363 [395-402]	P68363 1xBiotin [K401]	Tubulin alpha-1B chain [OS=Homo sapiens]	1	1285.61	0.94	1.352	0.602	1.269	1.839	110.5	105.8	143.1	86.2	112.7	41.8	160.9	101.2	107.8	129.7	103.3	95.2	197.6	87.9	139.7	60	84.1	89.8	110.1	123.8	86.5	48.8	32.7	40.8	9763.89	6143.6	6543.86	7868.15	6267.6	5775	11991	5336.6	8475.63	3637.76	5104.11
[K].VFVRPTNSCMKTIGVHDR.[V]	1xBiotin [K11]; 1xCarbamidomethyl [C9]; 1xOxidation [M10]	1	4	P52803	P52803 [156-173]	P52803 1xBiotin [K166]	Ephrin-A5 [OS=Homo sapiens]	1	2359.15	1.237	0.918	1.071	1.575	1.838	112.7	127.7	117.2	91.6	74.5	76.4	96.8	101.3	69.3	175.1	109.6	85.8	54	100.7	208.4	223.1	77.5	78.7	63.9	98.1	62.5	87.4	42.2	65.6	3977.37	4161.3	2848.55	7193.11	4503.83	3524.14	2218.67	4135.75	8558.93	9164.39	3183.99
[K].IGHPAPNFKATAVMPDGQFK.[D]	1xBiotin [K9]; 1xOxidation [M14]	1	4	Q06830	Q06830 [8-27]	Q06830 1xBiotin [K16]	peroxiredoxin-1 [OS=Homo sapiens]	1	2368.16	1.883	1.459	0.591	2.353	1.818	62.7	118.1	172.4	115.4	87.5	43.9	85.3	50.6	66.1	202.4	124.5	56.6	217.3	127.9	181.7	49.9	121.7	128.5	44.8	92.4	92.2	46.3	41.4	70.6	4167.15	2471.19	3229.02	9886.21	6081.58	2765.3	10617	6245.76	8876.02	2435.96	5942.77
[K].NVKLTVSNVLK.[E]	1xBiotin [K3]	1	8	P02786	P02786 [372-382]	P02786 1xBiotin [K374]	Transferrin receptor protein 1 [OS=Homo sapiens]	1	1440.82	0.877	1.074	0.492	0.715	1.817	120	100.5	118.1	58.1	171.3	32	115.8	144.6	88.8	97	126.9	96.2	129.2	103.4	114	117.2	56.1	42	180.8	165.4	121.3	30.9	41	29.6	8242.12	10289.4	6316.51	6904.07	9028.73	6849.53	9194.25	7357.42	8113.24	8337.63	3991.06
[R].LASYLDKVR.[A]	1xBiotin [K7]	7	8	P02533; P13645; P19012; Q04695	P02533 [126-134]; P13645 [157-165]; P19012 [116-124]; Q04695 [95-103]	P02533 1xBiotin [K132]; P13645 1xBiotin [K163]; P19012 1xBiotin [K122]; Q04695 1xBiotin [K101]	Keratin, type I cytoskeletal 14 [OS=Homo sapiens] Keratin, type I cytoskeletal 10 [OS=Homo sapiens] Keratin, type I cytoskeletal 15 [OS=Homo sapiens] Keratin, type I cytoskeletal 17 [OS=Homo sapiens]	1	1290.69	3.367	1.034	0.654	1.847	1.811	51.5	155.1	147.9	106.6	80.1	58.8	37.3	54.5	50.7	125.5	152.4	190.2	130.6	145.4	196.7	128.7	104.8	72.7	78.7	120	47.5	34.2	72.1	57.8	2988.83	4369.19	4061.36	10063.8	12220.3	15250.6	10472.5	11655.4	15767.6	10318	8396.95
[K].KALAAGGYDVEK.[N]	1xBiotin [K1]	1	4	P16401	P16401 [67-78]	P16401 1xBiotin [K67]	Histone H1.5 [OS=Homo sapiens]	1	1447.72	3.378	1.323	0.52	2.861	1.781	43	145.1	192	90.9	70.7	58.3	61.3	36.5	42.5	113	143.5	209.2	158.1	211	189.8	88.8	109.7	89.8	71.2	69.8	55.3	57.6	61.6	31.3	3383.26	2012.5	2344.13	6234.27	7917.84	11548.4	8727.99	11646.2	10476.9	4902.62	6054.22
[K].EGLELLKTAIGK.[A]	1xBiotin [K7]	2	7	P06733-1	P06733-1 [222-233]	P06733-1 1xBiotin [K228]	alpha-enolase [OS=Homo sapiens]	1	1497.83	2.431	0.774	0.826	3.783	1.78	65.2	180.5	139.6	124.1	34.9	55.7	69.5	57.4	81.2	136.2	192.3	197.3	98.2	179.8	148.8	148.5	132.2	36.8	37.2	47.5	36.5	58	59.4	83.4	3411.87	2816.44	3985.14	6686.02	9439.77	9686.52	4820.34	8824.07	7302.49	7288.8	6489.11
[R].SLKEISDGDVIISGNK.[N]	1xBiotin [K3]	3	5	P00533-1	P00533-1 [452-467]	P00533-1 1xBiotin [K454]	epidermal growth factor receptor [OS=Homo sapiens]	1	1900.97	1.807	1.137	0.828	2.661	1.77	72.8	129.9	147.6	122.2	55.5	72.1	76.5	59.8	74.6	138.3	133	119.5	151.2	158.8	120.2	125.2	183.2	65.6	56.8	110.4	36.9	37.1	79	73.8	3854.14	3012.24	3755.73	6964.59	6700.31	6017.94	7616.81	7996.51	6053.91	6303.85	9225.45
[K].AQAYQTGKDISTNYYASQK.[K]	1xBiotin [K8]	1	16	P14625	P14625 [664-682]	P14625 1xBiotin [K671]	Endoplasmin [OS=Homo sapiens]	1	2363.1	5.126	0.966	1.007	1.938	1.76	21.7	148.5	143.4	135.5	74	77	19.4	38.9	22.4	99.4	153.4	192.7	108.3	163.8	148.1	164.9	123.7	140	15.1	89.8	76.4	79.6	95.9	68.3	3318.19	6651.62	3830.71	17009.5	26258.7	32990.4	18549	28038	25358.4	28235.9	21186.1
[K].AVEHINKTIAPALVSK.[K]	1xBiotin [K7]	1	29	P06733-1	P06733-1 [65-80]	P06733-1 1xBiotin [K71]	alpha-enolase [OS=Homo sapiens]	1	1917.06	2.754	0.718	0.977	1.67	1.752	58.7	166.1	119.2	114.1	72.2	69.7	52.5	64.7	61.7	89.3	174.5	178.2	113	125.3	126.8	119.8	158	110.3	75.9	75.8	58.3	63	73.2	79.6	36122	44482.1	42425.2	61401.8	120001	122514	77694.5	86142.2	87178.3	82399.1	108669
[R].VMEHFIKLYK.[K]	1xBiotin [K7]	1	1	P11021	P11021 [262-271]	P11021 1xBiotin [K268]	78 kDa glucose-regulated protein [OS=Homo sapiens]	1	1533.8	1.128	1.064	0.772	1.683	1.74	119.7	110.6	117.6	119.6	69.9	62.6	132.8	118.6	73	109.6	104.8	149.8	80.1	181.9	116.6	118.5	135.5	61.9	69.2	80.5	65.7	62	77.9	61.6	4035.19	3602.98	2217.78	3328.8	3183.29	4549.74	2434.57	5526.88	3540.6	3599.82	4116.35
[R].DNIQGITKPAIR.[R]	1xBiotin [K8]	1	8	P62805	P62805 [25-36]	P62805 1xBiotin [K32]	histone H4 [OS=Homo sapiens]	0	1551.83	3.422	0.753	0.656	2.311	1.736	55.6	190.5	143.5	94.1	62.1	54.2	48	56.1	63.7	103.2	191.8	231.4	119.6	159.9	144.5	94.8	165.9	74.6	62.5	43.2	75.2	52.4	58.5	54.6	2652.94	3100.52	3521.39	5710.78	10611.3	12799.4	6617.5	8845.41	7995.21	5242.54	9176.04
[R].IITITKSLDR.[E]	1xBiotin [K6]	2	3	P33151	P33151 [208-217]	P33151 1xBiotin [K213]	Cadherin-5 [OS=Homo sapiens]	1	1385.78	0.784	1.395	0.478	1.308	1.735	129.4	101.4	141.5	67.6	121.1	39	40.6	202.3	136.6	93.8	112.9	107	149.3	108.3	177.1	66	71.3	72	60.6	127.8	135.4	37.6	60.2	41.1	2177.26	10850	7326.28	5030.08	6057.58	5741.54	8007.41	5811.54	9500.97	3539.95	3825.23
[K].ASGPPVSELITKAVAASK.[E]	1xBiotin [K12]	3	11	P10412	P10412 [35-52]	P10412 1xBiotin [K46]	Histone H1.4 [OS=Homo sapiens]	1	1952.05	3.235	0.867	0.776	1.725	1.73	52.4	169.6	130.7	115	75.7	56.5	67.9	53.4	38.1	42.5	172.7	281.4	71.8	244	133	55.7	117.1	136.8	77.1	78.7	49.7	57.6	43.5	79	3471.23	2731.03	1946.81	2175.5	8836.17	14398	3673.89	12480.9	6806.24	2851.93	5991.41
[K].FQDTDGKHLLPK.[I]	1xBiotin [K7]	2	7	P52209	P52209 [242-253]	P52209 1xBiotin [K248]	6-phosphogluconate dehydrogenase, decarboxylating [OS=Homo sapiens]	1	1624.82	1.43	1.009	1.127	1.493	1.727	71.5	128.1	115.6	130.3	79	75.4	64.4	92.5	71.8	92.1	128.6	130.4	116.1	105.6	131.5	144	130.8	122.9	79.3	80.9	70.7	60.3	102.3	75.7	14045.5	20182.3	15657.4	20091.4	28054.4	28440.1	25324.6	23034.5	28686.5	31403.5	28534.3
[K].LDKSQIHDIVLVGGSTR.[I]	1xBiotin [K3]	2	3	P11142-1	P11142-1 [326-342]	P11142-1 1xBiotin [K328]	Heat shock cognate 71 kDa protein [OS=Homo sapiens]	1	2064.09	1.778	1.026	0.882	1.356	1.712	57.7	188.1	114.7	101.2	84.6	53.7	55.1	53.7	104.5	88.8	179.5	185.8	91.1	196.3	109.5	84.6	96.6	112.3	78.2	103.4	80.7	51.3	79.3	49.4	2041.28	1989.41	3873.48	3293.09	6655.13	6887.42	3377.63	7274.93	4058.62	3134.39	3581.57
[K].NNIKLYVR.[R]	1xBiotin [K4]	4	1	P07900; P08238	P07900 [359-366]; P08238 [351-358]	P07900 1xBiotin [K362]; P08238 1xBiotin [K354]	Heat shock protein HSP 90-alpha [OS=Homo sapiens] Heat shock protein HSP 90-beta [OS=Homo sapiens]	1	1245.68	1.544	1.254	0.704	1.868	1.706	75.1	115.9	145.3	102.3	101.5	60	71.1	79.5	83.5	91.2	148	122.8	91.3	154	216.4	87	108.4	111.5	48.9	109.7	107.5	36.7	63.5	68.9	4061.35	4540.96	4767.63	5209.51	8452.62	7011.15	5213.37	8793.32	12353.8	4965.75	6190
[R].GHPDPKLSWSQLGGSPAEPIPGR.[Q]	1xBiotin [K6]	1	11	P50895	P50895 [477-499]	P50895 1xBiotin [K482]	Basal cell adhesion molecule [OS=Homo sapiens]	1	2609.29	1.763	1.016	0.585	1.497	1.689	114.1	156	178.6	38.1	89.1	24	22.4	121.1	127.4	102.8	165.5	224.7	34.4	228.3	189.5	40.4	133.6	37.1	45.7	94.6	152.4	21.9	32.7	25.4	1956.04	10563.5	11115.8	8969.43	14440.3	19598.7	3005.11	19913.1	16529.6	3525.88	11658.3
[K].QPAGKVQIVSK.[K]	1xBiotin [K5]	4	4	P27816-1	P27816-1 [987-997]	P27816-1 1xBiotin [K991]	Microtubule-associated protein 4 [OS=Homo sapiens]	1	1380.77	1.674	0.725	0.921	1.65	1.682	87.8	138.4	133.8	107.7	68.2	64	85.9	90.4	76.6	128.2	135.3	188.8	90.6	136.9	130.8	105.3	83.5	152.1	54.9	66.7	94.8	51.4	64.9	62.6	2962.05	3120.04	2642.44	4422.37	4668.46	6513.51	3126.1	4723.94	4511.73	3633.01	2879.55
[K].EKYIDQEELNK.[T]	1xBiotin [K2]	5	11	P07900; P08238	P07900 [282-292]; P08238 [274-284]	P07900 1xBiotin [K283]; P08238 1xBiotin [K275]	Heat shock protein HSP 90-alpha [OS=Homo sapiens] Heat shock protein HSP 90-beta [OS=Homo sapiens]	1	1634.77	1.942	0.984	0.739	1.41	1.679	71.7	139.2	134.8	99.7	95.4	59.3	28.5	76.4	73.5	111	144.4	142.8	132.8	142	138.3	121.5	91.5	102.2	129.9	97.8	94.2	19.8	92.6	60.9	3157.15	8464.36	8146.1	12300.7	15999.5	15822.9	14713.7	15740.6	15324.6	13468	10144.4
[R].SLYNLGGSKR.[I]	1xBiotin [K9]	1	6	P13647	P13647 [64-73]	P13647 1xBiotin [K72]	keratin, type II cytoskeletal 5 [OS=Homo sapiens]	1	1320.67	1.36	1.1	0.457	2.068	1.678	107.6	146.4	156.4	71.5	75.6	42.6	26.9	123	135.8	77.4	167.3	168.5	139.7	178.7	185.3	81.7	108.6	36.4	86.4	37.5	119.2	54.4	24.5	48.7	1910.67	8732.33	9641.07	5494.14	11879.7	11961.1	9920.84	12690.2	13153.7	5801.61	7713.11
[R].VNFAMNVGKAR.[G]	1xBiotin [K9]	3	4	P14618	P14618 [490-500]	P14618 1xBiotin [K498]	Pyruvate kinase PKM [OS=Homo sapiens]	1	1432.72	1.356	1.178	0.872	1.238	1.67	103	107.6	126.7	110.5	86.6	65.7	108	60.6	101.2	83.1	105.7	146.4	99.3	136.5	124.5	108.5	113.2	100	85.1	80.3	119.2	64.5	59.9	104.1	3714.76	2082.56	3479.55	2856.28	3634.49	5036.45	3415.85	4693.41	4281.71	3732.32	3894.72
[R].LKLEPHEGLLLR.[F]	1xBiotin [K2]	4	22	P08195	P08195 [614-625]	P08195 1xBiotin [K615]	4F2 cell-surface antigen heavy chain [OS=Homo sapiens]	1	1643.93	0.783	1.018	0.947	0.739	1.644	119.9	93.9	97.3	92.1	140.6	56.2	106.5	123.9	137.4	85.4	107.2	97	84.1	100.5	109.2	109.4	95.1	77.4	145.2	147.7	107.1	58.1	61.7	47.1	69012.5	80319	89074	55356.3	69518.3	62861.6	54499.9	65135.5	70767.9	70896.4	61663.2
[R].KGLLPTPDEFPR.[F]	1xBiotin [K1]	1	1	Q9C0J8	Q9C0J8 [1161-1172]	Q9C0J8 1xBiotin [K1161]	pre-mRNA 3' end processing protein WDR33 [OS=Homo sapiens]	1	1595.83	0.909	1.491	1.033	1.029	1.643	90.5	82.3	122.7	115.1	119.2	70	85.4	66.8	124.2	77.6	62.1	81.3	118	100.1	115.8	103.5	143	108.6	88.4	112.5	209.3	66.1	72.6	64.8	2462.89	1927.35	3581.7	2239.25	1790.83	2345.05	3404.29	2888.16	3338.86	2984.04	4124.68
[K].VQVSYKGETK.[A]	1xBiotin [K6]	1	2	P0DMV8	P0DMV8 [103-112]	P0DMV8 1xBiotin [K108]	heat shock 70 kDa protein 1A [OS=Homo sapiens]	1	1364.69	2.899	0.989	0.779	1.785	1.627	44.9	130.3	157.4	122.6	88.2	56.6	46	30.9	78.9	133.2	128.1	185.4	161	123.5	183.4	21.7	160.4	125.3	34.3	90.2	113.5	28	98.6	57.8	4011.45	2701.3	6884.08	11628.1	11184.3	16182.4	14052.2	10779.3	16012	1892.35	14002.8
[K].SPAKSPNPSTPR.[G]	1xBiotin [K4]	2	3	O76021	O76021 [392-403]	O76021 1xBiotin [K395]	Ribosomal L1 domain-containing protein 1 [OS=Homo sapiens]	1	1464.73	1.491	1.029	1.875	0.775	1.62	50.5	83.9	102.3	177.1	76.9	109.3	70.3	38.1	48.5	54.4	80.6	104.7	54.9	98.3	107.7	135.2	170.2	202	139.9	70.8	73.9	166.8	105	78.5	3656.44	1984.96	2523.24	2830	4192.89	5451.22	2857.65	5115.92	5606.71	7036.67	8856.36
[K].SKGIAYIEFK.[T]	1xBiotin [K2]	1	1	P19338	P19338 [428-437]	P19338 1xBiotin [K429]	Nucleolin [OS=Homo sapiens]	1	1381.72	1.22	0.87	0.893	0.99	1.603	95.8	116.9	124.2	98.1	104.3	60.7	82.3	94.8	119.5	115.7	90.7	147.9	122.9	126.3	78.9	97.1	123.9	70.5	103.2	151	79.8	60.1	77.3	58.4	2672.72	3078.95	3881.16	3757.73	2947.25	4804.75	3992.93	4101.32	2563.99	3152.88	4023.51
[K].EAGGGGVGGPGAKSAAQAAAQTNSNAAGK.[Q]	1xBiotin [K13]	4	4	Q8NC51-1	Q8NC51-1 [40-68]	Q8NC51-1 1xBiotin [K52]	Plasminogen activator inhibitor 1 RNA-binding protein [OS=Homo sapiens]	1	2681.27	4.128	0.781	0.8	2.681	1.593	45.8	189	147.6	99.9	55.1	62.7	48.3	31.2	66.1	144.5	199.3	234.6	31.3	155.6	209.7	105.3	167.8	36.1	53.8	58.1	66.3	66.1	31.4	94.5	2798.28	1806.06	3832.43	8376.93	11552	13595.6	1816.19	9021.54	12156	6103.06	9723.86
[K].YGQPLPGYTTKGK.[E]	1xBiotin [K]	2	3	P17936	P17936 [268-280]	P17936 1xBiotin [K]	Insulin-like growth factor-binding protein 3 [OS=Homo sapiens]	1	1635.82	2.283	0.902	0.704	2.401	1.584	69.9	163.5	129	113.2	53.7	70.7	82.4	70.4	52.4	110.9	164.6	188.1	129.9	169.7	127.1	74.9	113.9	119.4	54.1	83.4	41.5	70.8	75.4	71.2	3898.19	3330.77	2478.47	5248.14	7789.71	8898.42	6147.03	8027.64	6012.37	3542.86	5391.42
[K].DGADFAKWR.[C]	1xBiotin [K7]	3	2	P04075	P04075 [141-149]	P04075 1xBiotin [K147]	fructose-bisphosphate aldolase A [OS=Homo sapiens]	1	1291.59	1.335	1.14	0.752	1.514	1.579	90.6	121	138	100.8	91.1	58.6	51.6	98.1	107.1	101.4	132.1	131.1	58	153.7	149.5	92.5	115.6	109.2	98.7	99.2	74.9	105.3	58.6	63.5	1931.3	3675.84	4012.77	3799.37	4947.66	4908.81	2171.31	5756.22	5598.43	3464.31	4330.73
[K].KLVWVPSDK.[S]	1xBiotin [K1]	1	14	P35579-1	P35579-1 [30-38]	P35579-1 1xBiotin [K30]	Myosin-9 [OS=Homo sapiens]	1	1297.7	1.858	1.133	1.518	1.219	1.571	54	100.3	113.6	152.2	82.2	97.8	55.2	45	60.2	76.1	112.3	102.6	88.8	118.5	116.2	135.2	179.9	155.8	77.8	84.1	97.3	80.3	100.1	114.5	11985.8	9769.01	13054.1	16499.2	24368.1	22264.8	19274.1	25712	25215.8	29339.2	39019.8
[R].ILLQSKNAGAVIGK.[G]	1xBiotin [K6]	3	10	P61978	P61978 [47-60]	P61978 1xBiotin [K52]	Heterogeneous nuclear ribonucleoprotein K [OS=Homo sapiens]	1	1637.94	1.876	1.06	0.923	1.734	1.57	68.7	128.9	136.7	109.2	78.8	77.8	45.2	71.3	97.9	99	133.8	134.4	141.8	151.1	101.8	139.5	113.3	107	40	133.7	81.8	39.1	80.7	88.8	2765.13	4364.13	5990.8	6057.44	8184.92	8221.85	8677.87	9248.42	6226.62	8536.39	6931.73
[RK].LKVIFLENYR.[V]	1xBiotin [K2]	3	2	P11216	P11216 [641-650]	P11216 1xBiotin [K642]	Glycogen phosphorylase, brain form [OS=Homo sapiens]	1	1520.83	2.927	0.641	0.975	1.601	1.556	60.7	177.5	113.7	91	71	86	46	60	123.8	175.5	157.6	177.8	85.2	130.4	112.5	83.1	138.4	90	73.8	62	70.2	39.7	89	85.1	2064.65	2692.57	5559.58	7880.17	7074.18	7979.65	3824.59	5852.8	5048.33	3728.37	6213.78
[R].IPTPVIHTKH.[-]	1xBiotin [K9]	2	2	P12532	P12532 [408-417]	P12532 1xBiotin [K416]	Creatine kinase U-type, mitochondrial [OS=Homo sapiens]	1	1368.75	1.532	1.062	0.95	1.349	1.552	78.5	120.2	124.2	116.4	85.2	75.4	73	80.3	83.1	84.5	123	130.4	105.1	127.1	138.6	105.2	131.6	119.1	84.3	102.7	87.1	62.7	77.2	84.8	10334.6	11369.3	11770.9	11966.9	17414.8	18467.9	14883.5	17995.2	19622.1	14891.1	18636
[R].TKSTGGAPTFNVTVTK.[T]	1xBiotin [K2]	1	3	P07737	P07737 [90-105]	P07737 1xBiotin [K91]	profilin-1 [OS=Homo sapiens]	1	1834.94	2.151	0.883	0.651	2.313	1.545	77.1	160.8	137.5	102.9	55	66.6	60.4	76.6	78.3	129.9	171.3	159.7	175.1	136.5	114.7	71.7	102.2	114.1	111.6	49.6	54.6	66.1	60.9	66.6	2116.64	2684.33	2744.87	4553.62	6003.76	5597.5	6138.71	4786	4020.85	2513.83	3581.19
[R].GELALKDAR.[AN]	1xBiotin [K6]	3	3	P13647	P13647 [421-429]	P13647 1xBiotin [K426]	keratin, type II cytoskeletal 5 [OS=Homo sapiens]	1	1198.62	1.43	1.121	0.37	3.568	1.542	113.1	161.7	173.3	62.9	48.6	40.6	49.7	148.9	112.2	117.7	164.2	160.4	131.9	196	171.9	48.8	105.7	62.4	48.2	30.8	108.8	40.2	33.4	68.5	3004.64	8997	6778.19	7112.11	9920.55	9690.19	7969.2	11842.6	10385.6	2950.71	6383
[R].KLILDSAR.[A]	1xBiotin [K1]	2	5	P29401	P29401 [543-550]	P29401 1xBiotin [K543]	Transketolase [OS=Homo sapiens]	1	1141.64	1.12	1.14	0.867	1.122	1.534	87.9	98.5	124.5	107.9	110.9	70.3	104.9	85.7	87.4	96	97.9	113.6	129.5	123.7	103.1	128.6	107.2	88.2	126	110.3	86.4	65.6	75.9	69.9	25634	20945.6	21338.4	23458.4	23926.5	27753	31640.1	30227	25177.1	31418.3	26194.4
[K].LKEPWPNSDPPFSFK.[N]	1xBiotin [K2]	5	3	P16144-1	P16144-1 [190-204]	P16144-1 1xBiotin [K191]	Integrin beta-4 [OS=Homo sapiens]	1	2014.97	1.415	1.418	1.273	1.321	1.531	56.9	80.5	119.8	152.5	90.7	99.6	49.3	78.7	52.1	57.2	121.3	73.7	109.6	172.1	62.9	139.5	326.7	76.1	69.9	83	92.1	94.8	49.9	91.2	2120.13	3384.65	2238.32	2456.63	5213.87	3166.49	4712.18	7395.58	2702.15	5997.41	14042.3
[K].GKSADFTNFDPR.[G]	1xBiotin [K2]	1	16	P00918	P00918 [170-181]	P00918 1xBiotin [K171]	Carbonic anhydrase 2 [OS=Homo sapiens]	1	1580.72	2.376	0.836	1.015	1.71	1.517	60.8	144.4	120.8	122.6	70.6	80.8	14.4	75.1	60.6	143.9	134.3	161.9	115.1	120.4	131.8	118.8	128.3	122.2	70.4	88.3	62.5	72.1	99.3	80.5	2261.64	11809.1	9522.05	22627	21119	25453.3	18090.7	18922	20724.6	18682	20164.8
[R].NTKQEIAEINR.[M]	1xBiotin [K3]	3	4	P04259; P02538	P04259 [376-386]; P02538 [376-386]	P04259 1xBiotin [K378]; P02538 1xBiotin [K378]	keratin, type II cytoskeletal 6B [OS=Homo sapiens] Keratin, type II cytoskeletal 6A [OS=Homo sapiens]	1	1541.77	1.369	1.071	0.52	1.529	1.511	112.8	124.3	143	76	93.6	50.3	50.8	122.4	107.4	118.4	115.3	167.5	123.5	136.2	168.3	85.2	64.3	72.4	89.1	150.1	77.8	38.1	65.3	47.9	2298.85	5537.66	4861.44	5356.46	5218.61	7579.57	5590.57	6162.38	7617.5	3855.21	2909.64
[K].KLEDGPK.[F]	1xBiotin [K1]	3	4	P68104	P68104 [386-392]	P68104 1xBiotin [K386]	Elongation factor 1-alpha 1 [OS=Homo sapiens]	1	1012.51	1.79	1.094	0.536	1.628	1.511	78.8	141.1	154.3	77.1	94.8	53.8	65.6	83.5	78.8	96.2	141.1	168.6	134.7	158.4	154.3	77.1	72.2	91.6	152.3	94.8	75	53.8	60.6	41.4	11152	14198.1	13411	16357.5	24002	28681.5	22904.3	26945.1	26254.5	13120.8	12274.4
[K].VTQQGLKMVVPGLDGAQIPR.[D]	1xBiotin [K7]; 1xOxidation [M8]	1	2	P49327	P49327 [1152-1171]	P49327 1xBiotin [K1158]	Fatty acid synthase [OS=Homo sapiens]	1	2349.24	1.701	0.718	1.015	1.457	1.51	90.2	153.4	127.6	88.5	81.8	58.6	86.9	86.7	70.6	201.6	147.4	109.9	144.7	66.3	122.6	85.1	185.6	67.3	49.7	78.6	99.3	95	56.3	46.3	3419.45	3409.86	2777.77	7931.97	5800.49	4322.78	5692.89	2607.69	4824.9	3346.55	7301.33
[R].LIGDAAKNQVALNPQNTVFDAK.[R]	1xBiotin [K7]	2	6	P0DMV8	P0DMV8 [50-71]	P0DMV8 1xBiotin [K56]	heat shock 70 kDa protein 1A [OS=Homo sapiens]	1	2553.31	1.644	1.247	0.802	1.617	1.503	77.2	124.1	127.4	99.1	92.6	79.7	14.6	80.8	78.4	83.8	126	132.9	124.6	129.3	165.7	99.8	151.2	100.6	76.2	102.5	94	58.1	80.9	100.6	2537	14031	13615.1	14551.1	21866.1	23073.9	21622.6	22451.5	28763.3	17331.1	26249.8
[K].VTQQGLKMVVPGLDGAQIPR.[D]	1xBiotin [K7]	1	3	P49327	P49327 [1152-1171]	P49327 1xBiotin [K1158]	Fatty acid synthase [OS=Homo sapiens]	1	2333.25	1.746	0.851	0.916	1.285	1.498	73.4	142.6	114.8	105.1	94	70.2	109.6	69.9	70.9	91.1	137.8	191.4	110.9	162.9	79.4	87.4	101.6	104.7	90.9	124.9	61.7	67.9	83.7	53.5	3534.82	2252.23	2286.85	2935.93	4444.54	6170.22	3577.21	5251.09	2558.57	2817.84	3276.5
[KR].VFYLKMK.[G]	1xBiotin [K5]	9	2	P63104-1; P31947-1	P63104-1 [116-122]; P31947-1 [118-124]	P63104-1 1xBiotin [K120]; P31947-1 1xBiotin [K122]	14-3-3 protein zeta/delta [OS=Homo sapiens] 14-3-3 protein sigma [OS=Homo sapiens]	1	1154.61	2.474	1.13	0.53	3.535	1.489	55.2	162.2	192.5	81.1	54.5	54.5	57	91.5	49	62.6	167.6	226.5	53.5	255.9	199	65.9	135.7	83.8	55.7	66	56.3	55.6	62.1	56.3	2582.68	4145.45	2218.07	2833.85	7590.01	10255.9	2425	11589.5	9010.5	2984.06	6147.07
[R].EQQSTYTFQLKAVDGGVPPR.[S]	1xBiotin [K11]	2	4	Q08174	Q08174 [676-695]	Q08174 1xBiotin [K686]	Protocadherin-1 [OS=Homo sapiens]	1	2447.2	6.577	0.765	0.585	3.853	1.486	35.5	181.7	196.9	81.4	49.7	54.8	37.9	43.4	27.7	188.4	193.8	285.4	39.8	218.2	210	86.9	127.7	28.1	28.3	56.6	53	56.8	58.4	59.7	2635.29	3017.26	1928	13098.9	13474.6	19843.5	2766.66	15175.4	14602.3	6040.41	8879.26
[K].TIGGGDDSFNTFFSETGAGKHVPR.[A]	1xBiotin [K20]	8	3	P68363	P68363 [41-64]	P68363 1xBiotin [K60]	Tubulin alpha-1B chain [OS=Homo sapiens]	1	2723.25	4.464	0.322	0.957	1.557	1.485	52	232.3	74.9	98.5	82.5	59.7	38.4	41.3	75.4	183.6	323.5	184.4	59.4	268.8	57.4	54.9	78.2	85.7	65.5	36.8	81.5	80.7	37	47.4	1851.62	1991.43	3636.6	8850.88	15590.9	8889.46	2865.55	12955.6	2766.33	2646.29	3768.54
[R].KISSDLDGHPVPK.[Q]	1xBiotin [K1]	2	8	P29401	P29401 [102-114]	P29401 1xBiotin [K102]	Transketolase [OS=Homo sapiens]	1	1618.83	1.093	0.821	1.242	0.572	1.474	97.1	88.8	92.8	115.2	127.9	78.2	103	99.2	82	90.8	89.6	118.3	94.8	66.5	97.1	19.5	117.8	143.4	169.6	127.7	130.8	77.3	92.8	79.9	15374	14810.1	12232.4	13544.6	13372.5	17648.4	14151.7	9927.79	14487.7	2908.23	17574.6
[K].KSADTLWGIQK.[E]	1xBiotin [K1]	3	1	P00338-1	P00338-1 [318-328]	P00338-1 1xBiotin [K318]	L-lactate dehydrogenase A chain [OS=Homo sapiens]	1	1472.76	2.053	1.057	0.698	1.786	1.47	72.5	149	162.2	79.3	83.1	53.9	50.5	109.2	74.8	133.3	169.9	153.6	61.2	167.2	179.5	81.7	125.3	67.5	53	100.5	85.7	55.6	51.3	80.1	1908.82	4130.99	2830.37	5043.65	6427.66	5811.38	2315.93	6327.68	6791.61	3092.91	4742.44
[R].GDGTGGKSIYGER.[F]	1xBiotin [K7]	1	3	P23284	P23284 [110-122]	P23284 1xBiotin [K116]	peptidyl-prolyl cis-trans isomerase B [OS=Homo sapiens]	1	1522.7	1.545	1.628	0.571	1.741	1.464	66.9	103.3	169.5	96.8	97.3	66.1	60.4	58.4	84.2	92.8	93.3	113.8	152.9	168.6	151.2	87.4	110.6	39.9	243.2	87.8	79.3	59.7	41.4	75.1	2687.7	2601.47	3749.02	4133.55	4151.92	5065.29	6809.26	7505.81	6730.18	3889.59	4925.52
[R].VAPEEHPVLLTEAPLNPKANR.[E]	1xBiotin [K18]	2	13	P60709	P60709 [96-116]	P60709 1xBiotin [K113]	Actin, cytoplasmic 1 [OS=Homo sapiens]	1	2521.32	1.629	1.044	0.549	1.454	1.462	91	145.5	131.2	83.7	90.3	58.4	19.1	101.8	97.9	113.8	156.4	165.9	141.1	173.2	134	71.3	95	90	108.1	93.3	97.1	14.2	62.8	65	3481.31	18594.6	17873.7	20787	28558.4	30298.2	25760.1	31621.1	24461.4	13021.1	17353.6
[R].ISVYYNEATGGKYVPR.[A]	1xBiotin [K12]	1	25	P07437	P07437 [47-62]	P07437 1xBiotin [K58]	tubulin beta chain [OS=Homo sapiens]	1	2043	1.417	1.149	1.066	1.049	1.461	77.4	109.7	110.6	110.4	105.4	86.5	17.7	91.2	78	77.2	110.5	122.9	97.1	141.2	111.4	150.6	109.2	111.2	97.1	134	106.1	54.4	103	87.1	3686.51	18956.2	16219.2	16054.5	22982.6	25553.6	20195.2	29364.6	23154.9	31308.4	22714.5
[R].LSVDYGKK.[S]	1xBiotin [K]	8	15	P68363	P68363 [157-164]	P68363 1xBiotin [K]	Tubulin alpha-1B chain [OS=Homo sapiens]	1	1135.58	1.182	0.967	0.734	1.45	1.46	115.8	126.4	122.3	89.7	84.3	61.4	110.7	113.5	94.1	120.9	111.2	134.7	200.8	104.4	116.9	81.8	85.8	88.3	125.3	72.9	80.6	17.6	81.8	58.7	20647.6	21170.5	17542.9	22537.2	20730.8	25116.6	37435.8	19460.9	21794.4	15257.7	15992.8
[K].KPAAAGVK.[K]	1xBiotin [K1]	1	1	P16401	P16401 [161-168]	P16401 1xBiotin [K161]	Histone H1.5 [OS=Homo sapiens]	0	967.539	2.84	1.106	0.624	1.862	1.458	57.1	130	159.8	99.7	85.9	67.6	69.1	41.8	58.3	121.6	132.7	196.1	134.5	163.2	167.6	70	101.8	111.8	87.7	98.8	37.9	69	76.7	61.7	3748.52	2267.69	3162.84	6599.75	7204.31	10646.2	7300.25	8858.62	9098.45	3798.43	5525.19
[K].ETQKSIYYITGESK.[E]	1xBiotin [K4]	1	11	P08238	P08238 [478-491]	P08238 1xBiotin [K481]	Heat shock protein HSP 90-beta [OS=Homo sapiens]	1	1872.9	1.679	1.078	0.929	1.133	1.452	63.9	107.4	126	113.4	111.2	78.1	22.2	65.9	88.6	110.6	129.9	101.4	140	101	129.8	114.2	116.8	130.1	125.4	88	114.5	80.5	93.5	47.8	1841.48	5461.72	7344.9	9172.11	10773.3	8411.68	11611.1	8375.13	10765.2	9473.34	9685.82
[R].EESGKPGAHVTVKK.[L]	1xBiotin [K13]	2	3	P22626	P22626 [100-113]	P22626 1xBiotin [K112]	heterogeneous nuclear ribonucleoproteins A2/B1 [OS=Homo sapiens]	1	1692.87	2.259	1.057	0.757	2.657	1.44	74.1	144.5	143.5	108.6	54	75.4	74.7	73	49.9	179.2	112.6	142.3	141.3	139.8	189.4	154.7	107	42.5	42.5	53.2	92.2	74.3	45.2	86.2	3216.73	3143.32	2146.55	7713.11	4848.32	6127.67	6084.47	6016.65	8154.12	6660.88	4605
[R].EMLQQSKILK.[VY]	1xBiotin [K7]; 1xOxidation [M2]	4	4	P07900; P08238	P07900 [401-410]; P08238 [393-402]	P07900 1xBiotin [K407]; P08238 1xBiotin [K399]	Heat shock protein HSP 90-alpha [OS=Homo sapiens] Heat shock protein HSP 90-beta [OS=Homo sapiens]	1	1459.76	1.902	1.421	0.632	0.869	1.432	51.9	98.8	140.3	88.7	161.5	58.8	29.8	86.5	53.2	158.4	101.2	62.7	154.8	100.6	143.7	92.3	79.2	90.8	224.2	165.4	73.8	68.1	60.2	55.3	1776.75	5148.7	3166.6	9431.09	6024.14	3732.73	9219.52	5992.9	8560.2	5495.62	4715.05
[R].LVKGPDPSSPAFR.[I]	1xBiotin [K3]	1	10	P07996	P07996 [48-60]	P07996 1xBiotin [K50]	thrombospondin-1 [OS=Homo sapiens]	1	1596.82	1.316	0.847	1.692	0.786	1.43	84.1	97.2	77.3	131.7	115.4	94.3	90.2	82.9	55.4	95.9	89.6	118.7	103.3	75.9	76.3	128.4	130	149.1	131.4	113.8	76.5	104.2	93.1	85.4	15431.4	14192.2	9482.35	16412.4	15335.1	20311.1	17683.1	12989.4	13054.1	21973.9	22240.7
[K].EFDGKSLVSVTK.[E]	1xBiotin [K5]	3	4	P08238	P08238 [527-538]	P08238 1xBiotin [K531]	Heat shock protein HSP 90-beta [OS=Homo sapiens]	1	1535.78	1.387	0.801	1.582	1.174	1.422	81.1	112.4	90.1	142.5	76.8	97	75.9	118.7	86.1	111.4	119.4	153.1	42.7	128.3	95.7	151.4	153.9	75.9	43.6	91	81.6	53.4	114.8	103.1	3889.07	6081.52	4411.27	5707.6	6119.13	7843.47	2185.45	6575.63	4904.31	7756.54	7884.79
[R].KVIDDTNITR.[L]	1xBiotin [K1]	1	8	P05783	P05783 [187-196]	P05783 1xBiotin [K187]	Keratin, type I cytoskeletal 18 [OS=Homo sapiens]	1	1400.72	1.188	1.213	0.528	1.118	1.419	95.3	113.2	137.3	77.5	122.7	54.1	80.6	98.7	91.3	95.7	108.4	150	124.8	131.5	147.8	74.2	78	47.6	199.6	117.6	102.9	44.5	54.9	51.8	15479	18956.7	17531	18389.9	20829.6	28816.4	23977.9	25260.9	28380.8	14261.2	14972.9
[K].AASGEAKPK.[AV]	1xBiotin [K7]	3	3	P16401; P10412	P16401 [114-122]; P10412 [111-119]	P16401 1xBiotin [K120]; P10412 1xBiotin [K117]	Histone H1.5 [OS=Homo sapiens] Histone H1.4 [OS=Homo sapiens]	0	1084.55	2.352	1.162	0.448	3.511	1.417	78.8	149.1	173.4	77.7	49.4	71.6	77.8	46.6	88.6	120.1	147.3	208.3	150.9	171.2	188.1	76.8	118.9	67	48.8	40.8	55.5	70.7	83.9	38.7	3462.68	2075.42	3942.98	5345.83	6555.57	9272.51	6717.04	7620.48	8372.23	3416.97	5290.75
[K].LDVQFSGLTKGDAVR.[D]	1xBiotin [K10]	2	22	P21333	P21333 [907-921]	P21333 1xBiotin [K916]	Filamin-A [OS=Homo sapiens]	1	1831.94	1.624	1.082	1.189	1.088	1.384	63.3	102.8	111.3	132.3	102.3	88	54.1	79.8	63.5	89.2	103.1	129.4	112.4	106	111.5	132.6	144.9	98.7	102.5	122.7	77	80	104.7	88.2	15075.3	22233	17686.8	24875.2	28727.5	36062.2	31319.1	29534.2	31092.2	36958.5	40385.4
[K].AENKGISPVVSEHR.[K]	1xBiotin [K4]	4	9	Q99700-1	Q99700-1 [778-791]	Q99700-1 1xBiotin [K781]	Ataxin-2 [OS=Homo sapiens]	1	1748.87	3.376	0.911	0.954	1.728	1.369	42.2	142.4	129.7	123.7	71.7	90.4	15.5	47.5	91.4	67.5	160.4	185.6	82.1	146.1	157.2	93.2	139.4	141.1	80.7	91	61	22.4	101.8	116.1	1771.21	5424.49	10431.9	7709.62	18313.3	21190.8	9376.57	16687.4	17947.9	10646.5	15913.2
[R].DIKGESLFQGR.[G]	1xBiotin [K3]	1	10	P09758	P09758 [229-239]	P09758 1xBiotin [K231]	Tumor-associated calcium signal transducer 2 [OS=Homo sapiens]	1	1475.73	0.927	1.024	0.686	0.832	1.368	116.7	108.1	110.7	76	133	55.5	66.8	117.8	135.2	83.5	109.2	112.5	109.6	111.8	112.4	76.7	79.1	67.6	180.3	134.3	126.5	45.7	75	56.1	15788.7	27859.5	31980	19743.9	25813.2	26600.8	25927	26428	26570.2	18133.3	18707.5
[K].IISKIENHEGVR.[R]	1xBiotin [K4]	3	8	P14618	P14618 [267-278]	P14618 1xBiotin [K270]	Pyruvate kinase PKM [OS=Homo sapiens]	1	1620.85	2.499	0.919	0.873	1.637	1.367	67.2	137.7	126.6	110.5	77.3	80.8	27.6	67.3	70.2	137.9	129.5	175.4	126.8	121	146.2	107.9	119.6	110.7	77.5	120.1	66.9	90.2	80.9	24.4	3220.07	7860.2	8197.75	16103.1	15116.4	20486.2	14804.4	14127.4	17067.7	12596.9	13968.9
[-G].MQIFVKTLTGK.[T]	1xBiotin [K6]	4	5	P62987	P62987 [1-11]	P62987 1xBiotin [K6]	Ubiquitin-60S ribosomal protein L40 [OS=Homo sapiens]	1	1491.81	3.587	0.973	0.482	4.125	1.361	54	193.8	170.9	88.9	38.8	53.6	54.2	33	57.2	107.4	194.2	230.1	155.7	223.9	171.3	108	89.1	30.8	37.7	38.9	104.1	31.3	53.7	79.3	3264.9	1992.4	3450.23	6475.74	11710.3	13873.1	9387.71	13500.6	10328.9	6511.2	5374
[K].AKGILFVGSGVSGGEEGAR.[Y]	1xBiotin [K2]	2	6	P52209	P52209 [118-136]	P52209 1xBiotin [K119]	6-phosphogluconate dehydrogenase, decarboxylating [OS=Homo sapiens]	1	2017.02	1.565	1.184	0.643	1.872	1.355	79.7	120.7	142.9	111.6	76.4	68.8	46.6	81	77	116.7	126.8	113.7	193.6	125	138.1	124.4	107.8	48.7	140.4	62	73.8	66.5	66	91.8	2297.8	3992.24	3792.96	5748.55	6246.8	5601.77	9536.74	6158.6	6805.01	6129.94	5311.12
[R].NLLSVAYKNVVGGQR.[A]	1xBiotin [K8]	2	2	P31947-1	P31947-1 [42-56]	P31947-1 1xBiotin [K49]	14-3-3 protein sigma [OS=Homo sapiens]	1	1843.98	1.156	0.633	0.709	1.546	1.355	94.5	208.4	124.4	75.6	47.8	49.4	184.5	94.3	86.5	70.4	213.3	208	71	135	124.2	75.4	66.1	95.7	45.9	95.2	47.7	49.3	48.8	88.8	7868.5	4019.36	3687.53	2999.71	9094.86	8867.62	3025.49	5757.17	5294.01	3216.55	2817.2
[K].GVPELVLKDQK.[D]	1xBiotin [K8]	8	1	P23229-1	P23229-1 [699-709]	P23229-1 1xBiotin [K706]	integrin alpha-6 [OS=Homo sapiens]	1	1451.79	0.776	1.693	0.621	1.133	1.339	110.5	78.2	132.4	87	116.9	75	42.1	119.2	110.8	68.7	78.4	92.5	223.8	132.8	103.3	87.2	64.1	127	135	117.2	94.7	47.9	80.2	75.2	1920.44	5432.46	5050.81	3132.56	3575.08	4214.95	10200.2	6051.78	4709.98	3976.06	2922.77
[K].DISLSDYKGK.[Y]	1xBiotin [K8]	1	5	Q06830	Q06830 [28-37]	Q06830 1xBiotin [K35]	peroxiredoxin-1 [OS=Homo sapiens]	1	1351.66	1.113	0.737	1.027	1.174	1.338	91.7	102.1	122.2	105.5	99.7	78.9	70.5	104.5	98.2	73.3	109.3	197	54	130.9	132	113	135.6	55.9	106.7	81.7	112.5	49.1	84.5	91.4	2567.28	3804.73	3573.98	2670.8	3979.5	7172.41	1967.24	4765.57	4808.17	4113.98	4936.79
[R].LKVGLQVVAVK.[A]	1xBiotin [K2]	1	4	P10809	P10809 [291-301]	P10809 1xBiotin [K292]	60 kDa heat shock protein, mitochondrial [OS=Homo sapiens]	1	1379.84	1.72	1.052	0.636	0.866	1.336	68.2	117.2	123.4	85.1	142.4	63.7	49.5	67.9	100.5	110.7	148	116.7	122.8	119.2	146.3	75.8	84.7	85.1	54.7	172.1	141.8	49.5	91.3	63.4	2330.01	3193.99	4732.05	5208.85	6965.02	5493.28	5781.15	5611.12	6886.13	3566.77	3986.4
[R].NVKAQSQTDR.[VA]	1xBiotin [K3]	8	8	P04439	P04439 [90-99]	P04439 1xBiotin [K92]	HLA class I histocompatibility antigen, A-3 alpha chain [OS=Homo sapiens]	1	1372.66	0.921	1.275	0.6	1.22	1.333	116.6	102.6	132	79.2	108.2	61.3	119.8	116	98.5	110.4	102.1	100.7	135.8	128.4	131.4	78.8	85.1	73.9	143.1	107.7	91.8	63.9	61	51.5	22364.6	21652.6	18388	20603.5	19062.8	18796.2	25352.1	23972.2	24516.5	14704.4	15889.5
[K].VDSKTVGQYEYYK.[V]	1xBiotin [K4]	1	5	P52799	P52799 [65-77]	P52799 1xBiotin [K68]	Ephrin-B2 [OS=Homo sapiens]	1	1805.84	1.141	1.284	0.834	1.548	1.331	95	102.2	148.7	121.1	64.3	68.8	104.9	64.5	90.4	73.7	97.2	195.8	156.2	141.5	94.6	131.8	115.3	78.9	61.2	109.2	61.1	65.5	59.3	99	3234.75	1990.06	2785.98	2271.1	2998.02	6038.25	4816.94	4361.72	2916.42	4063.63	3554.11
[R].INVYYNEATGGKYVPR.[A]	1xBiotin [K12]	1	5	P68371	P68371 [47-62]	P68371 1xBiotin [K58]	Tubulin beta-4B chain [OS=Homo sapiens]	1	2070.01	1.958	0.951	1.603	0.939	1.324	43.1	97.2	92.5	148.2	107.1	111.9	40.9	84.9	43.6	80.1	98.5	114.9	66.5	93.6	132.1	150.1	143.2	153	112.4	108.4	70.8	52.5	113.4	141.3	2000.87	4150.99	2133.44	3917.2	4813.9	5616.78	3249.72	4577.11	6459.87	7337.4	6999.34
[K].AAGAGKVTK.[S]	1xBiotin [K6]	3	13	P68104	P68104 [445-453]	P68104 1xBiotin [K450]	Elongation factor 1-alpha 1 [OS=Homo sapiens]	1	1028.56	1.544	1.061	0.783	1.228	1.323	78.8	121.8	129.2	101.2	105.3	63.7	79.4	67.5	77.7	97.7	120	137.2	127.3	117.6	136.4	99.7	81.6	114	140.3	103.7	82.6	92.8	61.7	62.7	25587.4	21756.1	25039.7	31506.7	38669.5	44235.2	41039	37920.6	43979.6	32143.3	26309.5
[R].HQGVMVGMGQKDSYVGDEAQSK.[R]	1xBiotin [K11]; 1xOxidation [M]	6	5	P60709	P60709 [40-61]	P60709 1xBiotin [K50]	Actin, cytoplasmic 1 [OS=Homo sapiens]	1	2593.15	2.472	1.244	0.323	3.203	1.319	43.2	188.4	202.6	58.6	63.2	44	40.4	47.5	88.6	56.4	207.3	219	73.9	272.3	222.9	88	64.5	47.8	69.6	62	83.3	66.7	48.4	41.4	1904.08	2237.37	4173.39	2656.73	9763.63	10316.4	3480.63	12828.7	10499.7	4145.58	3039.85
[R].KPESNAVTKTAGPIASAQK.[Q]	1xBiotin [K9]	4	4	P27816-1	P27816-1 [968-986]	P27816-1 1xBiotin [K976]	Microtubule-associated protein 4 [OS=Homo sapiens]	1	2124.11	2.533	1.04	0.485	2.472	1.305	63.2	160.1	166.6	80.8	67.4	61.9	72.7	64.7	36.5	109.8	163.8	174.8	153.3	178.8	170.4	82.7	177.8	40.8	80.5	68.9	38.7	58.2	63.4	64.2	3641.8	3236.85	1826.08	5498.5	8199.67	8750.75	7675.71	8951.05	8531.29	4140.72	8898.7
[K].AAGAGAAKR.[K]	1xBiotin [K8]	1	3	P16401	P16401 [28-36]	P16401 1xBiotin [K35]	Histone H1.5 [OS=Homo sapiens]	1	998.52	2.263	1.131	0.371	2.854	1.304	55.9	168.6	184.7	68.6	64.7	57.5	50.4	84.5	53.9	90.7	191.2	162.6	216.1	178.2	156.7	135.3	66.2	55.2	69.7	58.9	62.4	55.4	70.3	42.4	2139.17	3586.04	2289.22	3848.93	8114.12	6901.79	9173.14	7562.08	6651.99	5741.82	2808.89
[R].SSKGQIIGNFQAFDEDTGLPAHAR.[Y]	1xBiotin [K3]	1	2	Q14126	Q14126 [404-427]	Q14126 1xBiotin [K406]	Desmoglein-2 [OS=Homo sapiens]	1	2785.34	1.931	0.58	1.247	0.866	1.302	75.5	145.8	84.5	111.2	97.5	85.4	59.6	67.7	107.6	241	130.7	114.7	75.7	68.9	84.7	85.9	99.6	103	70.1	87.4	178.4	63.9	84.4	76.6	2085.97	2368.63	3768.44	8436.95	4574.84	4017.27	2651.83	2412.87	2966.06	3008.92	3488.68
[R].SLYGLGGSKR.[I]	1xBiotin [K9]	3	2	P04259; P02538	P04259 [60-69]; P02538 [60-69]	P04259 1xBiotin [K68]; P02538 1xBiotin [K68]	keratin, type II cytoskeletal 6B [OS=Homo sapiens] Keratin, type II cytoskeletal 6A [OS=Homo sapiens]	1	1263.65	0.895	1.121	0.448	1.402	1.295	135.6	121.5	129.7	58.1	93.6	61.5	153	133.3	104	109.5	119.4	131.5	147.4	127.5	127	57.1	101.5	42.5	92	90.6	98	27	78.3	60.4	10483.4	9133.61	7125.59	7499.69	8178.9	9009.91	10101.5	8733.58	8703.07	3913.26	6951.39
[R].NTKHEISEMNR.[M]	1xBiotin [K3]	1	2	P13647	P13647 [381-391]	P13647 1xBiotin [K383]	keratin, type II cytoskeletal 5 [OS=Homo sapiens]	1	1584.73	2.497	1.062	0.348	3.732	1.292	63	170.9	223.7	55.6	54.1	32.6	48	73.6	109.8	33.5	199.6	274	35.6	261.3	265.9	30.7	92.6	65	31.6	71.3	63.2	34.5	71.7	38.1	3683.45	5655.49	8430.16	2575.7	15332.3	21050	2735.99	20067.1	20426.5	2361.42	7115.06
[K].VVKQASEGPLK.[G]	1xBiotin [K3]	2	18	P04406-1	P04406-1 [261-271]	P04406-1 1xBiotin [K263]	glyceraldehyde-3-phosphate dehydrogenase [OS=Homo sapiens]	1	1381.75	1.372	1.137	0.784	1.527	1.289	86.3	118.3	134.5	105.5	88.1	67.4	86.3	67.1	97.7	97.3	118.5	125.3	137.1	132.5	134.6	78.8	105.6	118.1	101.2	88.2	86.5	91.6	66	67.4	21798.3	16942.8	24660.3	24568.8	29903.5	31638.4	34621.4	33458.3	33989	19897.9	26655
[K].EYFSKQK.[-]	1xBiotin [K5]	1	3	Q06830	Q06830 [193-199]	Q06830 1xBiotin [K197]	peroxiredoxin-1 [OS=Homo sapiens]	1	1155.55	1.28	0.931	1.027	0.94	1.286	82.9	106.2	108.4	111.4	104.4	86.7	25.9	88.8	106.6	87.4	113.6	130.6	70.4	116.1	121.6	99.6	119.2	123.8	111.7	129.3	76.3	92.8	91.2	95.1	2050.55	7023.92	8435.79	6915.16	8989.29	10331.4	5566.17	9183.17	9620.69	7879.44	9434.78
[R].TGLIKGSGTAEVELK.[K]	1xBiotin [K5]	3	7	P14618	P14618 [121-135]	P14618 1xBiotin [K125]	Pyruvate kinase PKM [OS=Homo sapiens]	1	1728.92	1.94	0.989	0.988	0.761	1.283	55.5	107.7	106.5	105.3	140	85	33.2	52.4	108.1	92	101.6	143.5	63.4	100.5	173.7	135.7	99.3	96.2	132	134.7	92.8	55.1	80.1	105.8	2099.77	3314.9	6841.84	5821.26	6429.51	9085.44	4013.69	6361.33	10996.9	8593.04	6286.88
[K].GQEVSPKVYFMK.[Q]	1xBiotin [K7]; 1xOxidation [M11]	1	13	P09936	P09936 [72-83]	P09936 1xBiotin [K78]	Ubiquitin carboxyl-terminal hydrolase isozyme L1 [OS=Homo sapiens]	1	1654.8	1.13	1.085	1.452	0.87	1.282	69.2	105.7	114.7	118.3	99.8	92.3	125.1	59.6	59.6	114.6	91.1	67.3	134.4	50.5	98.9	195.3	89.9	102	154.5	82.8	86	136.4	79.6	72.3	20455.7	9750.89	9742.29	18744.2	14897.2	11010.7	21979.9	8253.13	16169.1	31925.4	14700.1
[K].DVNAAIATIKTK.[R]	1xBiotin [K10]	8	9	P68363	P68363 [327-338]	P68363 1xBiotin [K336]	Tubulin alpha-1B chain [OS=Homo sapiens]	1	1470.8	1.003	1.213	0.455	1.075	1.269	118.1	110.8	134.4	62.4	125.1	49.2	47.7	122.7	132.3	109.7	115.1	132.7	162	120.8	139.6	45.2	73.7	64.8	177.2	78.4	129.9	32.7	64.7	51.1	3045.81	7836.99	8452.09	7007.46	7352.48	8478.16	10346.5	7720.23	8917.45	2886.3	4705.95
[K].SFQKIQVR.[L]	1xBiotin [K4]	1	6	P62081	P62081 [71-78]	P62081 1xBiotin [K74]	40S ribosomal protein S7 [OS=Homo sapiens]	1	1231.66	0.86	1.285	0.988	1.183	1.268	100.9	86.8	111.6	110.2	96.8	93.7	132.1	91	81.4	97.4	78.3	76.6	167	100.6	96.5	137.2	99.4	97.7	122.2	87.3	81.6	92.2	84.5	77	9769.04	6732.6	6020.61	7207.77	5790.14	5667.4	12352.2	7441.64	7137	10149.8	7349.93
[K].VFVRPTNSCMKTIGVHDR.[V]	1xBiotin [K11]; 1xCarbamidomethyl [C9]	1	5	P52803	P52803 [156-173]	P52803 1xBiotin [K166]	Ephrin-A5 [OS=Homo sapiens]	1	2343.15	2.961	0.85	0.457	2.493	1.267	64.3	190.4	161.9	66.2	64.9	52.2	67.2	66	45.1	38	195.4	337.7	61	232.4	166.2	68	106.1	57.4	60.3	67.5	66.7	45.5	65.9	53.6	4014.39	3944.84	2693.2	2270.82	11679.1	20181.5	3642.88	13886	9928.62	4061.65	6339.04
[K].GGVVGIKVDK.[G]	1xBiotin [K7]	2	1	P04075	P04075 [102-111]	P04075 1xBiotin [K108]	fructose-bisphosphate aldolase A [OS=Homo sapiens]	1	1197.67	2.87	1.094	0.504	2.909	1.254	51.2	160.5	175.6	84.8	60.4	67.6	47.3	73.5	49.4	112.6	211	154.9	159.8	169.6	180.7	80.5	81.9	91.6	58.3	85.8	44	73.8	65.3	60	2159.88	3359.62	2256.72	5142.54	9640.8	7077.76	7301.21	7746.28	8253.18	3678.37	3740.24
[K].TKEAVLLLK.[K]	1xBiotin [K2]	1	1	P36578	P36578 [164-172]	P36578 1xBiotin [K165]	60S ribosomal protein L4 [OS=Homo sapiens]	1	1240.73	1.693	1.309	0.653	1.318	1.25	55.1	102.2	154.3	98.8	110.7	79	51.5	56.2	98	87.3	133.2	104.2	93.2	157.4	174.3	100.8	113.8	61.9	99.7	132.2	112.9	80.6	86.3	56.4	1805.94	1968.2	3434.98	3058.35	4667.15	3652.48	3266.54	5516.94	6108.18	3530.92	3987.16
[K].IKDPDASKPEDWDER.[A]	1xBiotin [K2]	1	1	P27797	P27797 [208-222]	P27797 1xBiotin [K209]	Calreticulin [OS=Homo sapiens]	1	2026.92	1.44	1.029	0.761	1.41	1.25	89.7	138.3	122.3	93	82.2	74.4	47.1	104.7	96.7	48.6	149.1	150.7	98.4	155.1	131.8	105.9	95.7	100.3	88.6	121.5	69.8	104.3	80.2	51.5	1821.4	4049.42	3739.76	1881.41	5769.73	5831.91	3806.47	6002.72	5099.63	4097.62	3704.29
[K].SAVGHEYQSKLSK.[H]	1xBiotin [K10]	3	3	Q14247-1	Q14247-1 [98-110]	Q14247-1 1xBiotin [K107]	Src substrate cortactin [OS=Homo sapiens]	1	1659.82	1.392	0.911	0.654	1.534	1.25	102.5	142.6	134.8	87.9	66.4	65.8	103.3	110.4	96.1	85	143.8	223.9	77.4	135.8	138.3	63.2	90.4	88.6	90.1	58.3	66.9	66.3	50.6	111.6	3697.49	3951.62	3440.92	3043.24	5145.63	8013.5	2771.28	4862.39	4949.4	2261.94	3234.77
[R].KDAEEWFFTK.[T]	1xBiotin [K1]	1	2	P02533	P02533 [300-309]	P02533 1xBiotin [K300]	Keratin, type I cytoskeletal 14 [OS=Homo sapiens]	1	1526.7	1.348	0.917	0.89	1.131	1.248	70.4	123.3	113.1	100.3	100	93	72.1	68.6	105.3	73.5	142	126.3	115.8	122.6	97.2	86.5	127.7	102.7	81.3	113.3	102.4	102.4	65.2	95.2	2318.28	2206.65	3386.67	2364.07	4566.59	4062.78	3724.72	3943.51	3127.29	2781.89	4108.44
[K].AEMNGSKLGR.[R]	1xBiotin [K7]	1	4	P16422	P16422 [71-80]	P16422 1xBiotin [K77]	Epithelial cell adhesion molecule [OS=Homo sapiens]	1	1288.61	2.601	1.023	0.447	2.106	1.246	60.7	157.8	161.5	58.7	76.7	84.5	44.3	59.9	78.7	65	155.9	283.5	117.6	159.5	178.8	58	109	52.5	84.8	67.9	75.7	37.8	83.5	87.5	2060.94	2787.5	3662.46	3022.45	7249.3	13184.8	5470.65	7417.93	8314.66	2698.24	5070.26
[K].NIMDFVQKK.[F]	1xBiotin [K8]	1	2	O95858	O95858 [143-151]	O95858 1xBiotin [K150]	Tetraspanin-15 [OS=Homo sapiens]	1	1348.68	0.924	0.849	1.123	0.889	1.233	116	107.2	90.9	104.3	102.3	79.4	80.9	109.2	152.5	100.9	108.3	91.9	70.6	143.7	85.6	114.6	79.3	98.2	65.3	169.2	96.3	93	65.8	74.7	2940.08	3969.54	5542.9	3667.84	3935.13	3339.71	2565.3	5223.58	3112.39	4167.19	2881.99
[R].SNDPKSQNHPGWLMR.[G]	1xBiotin [K5]	2	4	P06213-1	P06213-1 [567-581]	P06213-1 1xBiotin [K571]	insulin receptor [OS=Homo sapiens]	1	1992.92	3.129	1.153	0.537	6.658	1.231	56.6	208	204	55.5	30.6	45.1	70	38.8	59.2	57.8	217.7	219	80.3	252.5	213.5	58.1	263.3	43.1	30.8	32.1	32.3	36.5	47.2	47.8	4006.51	2222.58	3389.7	3305.89	12459.8	12534.9	4597.11	14451.1	12220.2	3326.48	15070.2
[K].ADLINNLGTIAKSGTK.[A]	1xBiotin [K12]	4	4	P07900; P08238	P07900 [101-116]; P08238 [96-111]	P07900 1xBiotin [K112]; P08238 1xBiotin [K107]	Heat shock protein HSP 90-alpha [OS=Homo sapiens] Heat shock protein HSP 90-beta [OS=Homo sapiens]	1	1841.98	2.517	0.912	0.686	1.562	1.226	50.7	153	140.7	96.5	82.7	76.4	107.5	49.9	49.2	123.9	150.8	196.2	53.5	178.9	138.6	95.1	51.4	113.4	114.5	81.5	75.5	92.5	52.1	75.3	3752.46	1743.34	1719.15	4326.4	5265.37	6852.39	1868.61	6246.74	4840.74	3322.3	1796.63
[R].KTVTAMDVVYALK.[R]	1xBiotin [K1]	1	5	P62805	P62805 [80-92]	P62805 1xBiotin [K80]	histone H4 [OS=Homo sapiens]	1	1664.88	5.2	0.724	0.674	3.603	1.223	46.9	243.8	176.5	35.3	49	48.6	43.6	51.9	49.8	65	259.1	329.6	34.7	260.4	187.6	30.3	175.4	37.6	57.2	52	24.8	51.6	64.7	24.8	3052.89	3636.58	3488.32	4547.37	18139.3	23074.9	2427.54	18227.5	13131	2121.37	12277.4
[R].ALQASALKAWGGK.[K]	1xBiotin [K8]	2	2	P04075	P04075 [305-317]	P04075 1xBiotin [K312]	fructose-bisphosphate aldolase A [OS=Homo sapiens]	1	1526.81	1.613	0.957	0.715	2.243	1.221	97.2	135.8	133.7	95.5	59.6	78.3	110	69.6	95.2	115.3	177.5	133	99.2	130.9	169.8	69.5	93.6	126.7	58.1	58.4	70.7	78.4	67.4	76.7	3486.15	2205.11	3016.2	3653.47	5623	4212.76	3144.02	4147.52	5379.54	2200.48	2964.65
[R].TWQKTHQGENNGLANSIR.[D]	1xBiotin [K4]	4	2	Q16787-1	Q16787-1 [399-416]	Q16787-1 1xBiotin [K402]	Isoform 1 of Laminin subunit alpha-3 [OS=Homo sapiens]	1	2280.09	1.332	1.645	0.642	1.981	1.219	74	98.5	162.1	104.1	75.9	85.4	76.8	73	82.7	102.3	137.3	89.7	63.1	229.3	168.3	111.9	75.4	108.1	50.9	78.9	115.8	92.5	88.7	55.2	2649.88	2520.01	2853.74	3530.46	4738.27	3095.21	2176.1	7911.98	5807.49	3862.55	2603.11
[R].EDSVKPGAHLTVKK.[I]	1xBiotin [K14]	2	1	P51991-1	P51991-1 [114-127]	P51991-1 1xBiotin [K127]	Heterogeneous nuclear ribonucleoprotein A3 [OS=Homo sapiens]	1	1734.92	2.318	0.895	0.627	1.57	1.219	76.2	176.7	112.8	92.9	71.9	69.4	38.6	86.7	90.5	52.1	201.1	218.6	67.7	195.7	128.4	42.4	105.7	119.4	84.5	81.8	61	79	48.9	97.9	1799.61	4043.61	4220.84	2429.58	9373.16	10188.8	3156.98	9122.87	5984.34	1978.6	4925.43
[R].MQKEITALAPSTMK.[I]	1xBiotin [K3]	7	1	P60709	P60709 [313-326]	P60709 1xBiotin [K315]	Actin, cytoplasmic 1 [OS=Homo sapiens]	1	1774.89	0.8	1.518	0.617	1.66	1.217	144	103.5	131.4	78	79.1	64	69.5	140	140	111.9	100.6	63.4	127.7	170	120.7	74.5	130.3	75.8	133.8	63.1	76.9	61.6	77.8	62.3	2046.07	4118.73	4117.93	3293	2959.5	1865.72	3757.71	5000.41	3552.33	2192.77	3833.73
[R].VTIMPKDIQLAR.[R]	1xBiotin [K6]	5	2	P84243	P84243 [118-129]	P84243 1xBiotin [K123]	histone H3.3 [OS=Homo sapiens]	1	1610.88	1.53	1.034	1.076	1.129	1.209	85.5	123.7	98.7	106.2	98.1	87.8	86	48.2	88.6	86.8	135.5	124.3	89.8	196.4	99.2	104.1	109.4	106.7	98.6	79.5	103.2	59.5	96.1	88.2	3181.64	1781.85	3277.58	3211.16	5013.6	4600.17	3321.41	7266.2	3671.38	3852.2	4049.24
[-].MESYHKPDQQKLQALK.[D]	1xAcetyl [N-Term]; 1xBiotin [K11]	2	2	P29401	P29401 [1-16]	P29401 1xAcetyl [N-Term]; 1xBiotin [K11]	Transketolase [OS=Homo sapiens]	1	2212.09	1.294	1.12	0.657	1.272	1.204	91	89.7	146.4	96.2	96.7	79.9	91.2	60.1	87.8	77.8	86.5	180	59	201.6	141.3	103.4	92.9	71.3	93.3	158.4	70	85.4	77.1	63	3229.17	2128.47	3110.07	2754.24	3064.56	6373.77	2089.89	7140.03	5004.73	3662.15	3289.24
[-].MPEPAKSAPAPK.[K]	1xBiotin [K6]; 1xMet-loss [N-Term]	5	1	Q16778; O60814	Q16778 [1-12]; O60814 [1-12]	Q16778 1xBiotin [K6]; 1xMet-loss [N-Term]; O60814 1xBiotin [K6]; 1xMet-loss [N-Term]	Histone H2B type 2-E [OS=Homo sapiens] Histone H2B type 1-K [OS=Homo sapiens]	1	1318.68	2.06	1.004	0.571	2.064	1.2	72.5	149.2	149.8	85.5	72.6	70.5	61.6	74.9	87.9	66.9	154.3	216.6	83.8	154.9	216.9	64.7	92.1	88.4	53.4	75	94	72.9	87.8	53.9	2533.34	3080.43	3612.78	2752.83	6344.76	8907	3446.63	6367.44	8917.6	2658.37	3786.17
[R].APFDLFENKK.[K]	1xBiotin [K9]	2	1	P08238	P08238 [339-348]	P08238 1xBiotin [K347]	Heat shock protein HSP 90-beta [OS=Homo sapiens]	1	1434.71	1.575	0.852	0.727	1.242	1.194	91.1	143.4	123.7	69	99.6	73.2	97.4	94.6	74	99	180.6	149.1	57.8	153.9	128.5	60.5	111.9	71.7	121.8	76.1	103.5	50.6	92.7	76.1	3296.53	3202.52	2504.23	3349.53	6110.3	5044.15	1956.74	5206.26	4349.11	2046.25	3786.21
[K].ISDSEGFKANLSLLR.[R]	1xBiotin [K8]	2	4	P23246-1	P23246-1 [272-286]	P23246-1 1xBiotin [K279]	splicing factor, proline- and glutamine-rich [OS=Homo sapiens]	1	1875.96	1.525	0.882	0.797	0.941	1.183	82.9	126.4	110.6	88.1	117.5	74.5	68.8	82	73	50.2	111.3	142.1	97.3	125.3	84.4	77.6	75.5	82.4	103.4	79.9	306.2	65.6	112.2	62.8	2658.86	3167.56	2818.75	1937.89	4297.9	5487.96	3758.81	4841.52	3261.6	2996.38	2916.55
[R].DKLRPIPITASVEIQEPSSR.[R]	1xBiotin [K2]	8	8	P23229-1	P23229-1 [614-633]	P23229-1 1xBiotin [K615]	integrin alpha-6 [OS=Homo sapiens]	1	2462.31	0.526	1.626	1.278	1.111	1.183	114.5	59.2	81.6	147	73.5	124.3	112.5	139	70.5	48.3	58.2	73.1	140.5	78.6	80.2	179.5	80	144.5	87.9	72.2	70.9	122.1	137.7	104.1	15203.7	18779.9	9529.08	6529.67	7858.26	9883.26	18988.1	10614.3	10841.5	24259.3	10807.4
[R].LVKSQLQGLSASAGLLEQMR.[H]	1xBiotin [K3]	4	6	Q16787-1	Q16787-1 [233-252]	Q16787-1 1xBiotin [K235]	Isoform 1 of Laminin subunit alpha-3 [OS=Homo sapiens]	1	2355.25	2.863	1.118	0.644	1.699	1.182	73.9	211.6	102.7	93.1	60.5	58.2	37.3	78.4	61.2	39.8	175.1	225.9	78.2	252.6	85	50.4	77	78.4	50	41.8	244.8	48.2	42.6	133.4	1764.8	3704.03	2889.88	1880.95	8273.68	10675.7	3696.28	11935.7	4017.3	2381.41	3638.63
[K].TFLHYDCGSKTVTPVSPLGK.[K]	1xBiotin [K10]; 1xCarbamidomethyl [C7]	2	4	Q6H3X3	Q6H3X3 [60-79]	Q6H3X3 1xBiotin [K69]	UL-16 binding protein 5 [OS=Homo sapiens]	1	2433.19	1.9	0.983	0.44	2.196	1.18	84	159.7	157	69.1	71.5	58.6	93.9	53.9	91.9	77.5	174.6	190.6	53.1	171.7	230.1	52.7	101.1	75.6	84.4	78.2	66.5	62.9	77.3	64	3435.47	1972.89	3362.65	2838.35	6389.99	6975.05	1945.39	6284.16	8423.27	1928.96	3702.25
[K].TVTAMDVVYALKR.[Q]	1xBiotin [K12]	1	3	P62805	P62805 [81-93]	P62805 1xBiotin [K92]	histone H4 [OS=Homo sapiens]	1	1692.88	1.109	0.947	1.043	1.213	1.178	95.7	102.5	95.1	137.8	79	90	123.1	67.4	90.1	96.4	83.4	136.5	89.5	161.4	79	82.4	130.1	129.6	74.3	123.6	65.2	73.1	84.7	110.4	3730.78	2042.29	2730	2922.41	2528.82	4137.26	2711.97	4892.99	2396.03	2498.34	3943.4
[R].EGNQDKFSYLPIQK.[G]	1xBiotin [K6]	8	11	P23229-1	P23229-1 [685-698]	P23229-1 1xBiotin [K690]	integrin alpha-6 [OS=Homo sapiens]	1	1892.92	1.01	1.387	0.421	1.253	1.178	107.7	106.6	147.9	62.5	122.2	53.1	97.1	112.4	118.8	111.2	120	98.8	161.4	154.3	142.6	67.9	65.3	34.6	128.8	127.5	108	20	75.8	55.4	11443.2	13243.9	14002.4	13112.5	14147.9	11648.9	19022.6	18188.4	16814.2	8005.17	7693.61
[K].VKVGVNGFGR.[I]	1xBiotin [K2]	1	4	P04406-1	P04406-1 [4-13]	P04406-1 1xBiotin [K5]	glyceraldehyde-3-phosphate dehydrogenase [OS=Homo sapiens]	1	1258.67	1.233	1.192	0.556	1.287	1.175	93.6	115.4	137.5	76.5	106.8	70.2	70.6	108.9	92	82.1	113.4	147.1	135.2	110	168.6	71.5	89.6	75.2	105	148.7	80.7	60.9	71.4	69	11373.9	17545.7	14823.9	13233.6	18276.8	23706.6	21785.2	17731	27165.5	11528.1	14434.4
[K].KYFLQTTTPLDYEK.[V]	1xBiotin [K1]	2	3	Q08174	Q08174 [455-468]	Q08174 1xBiotin [K455]	Protocadherin-1 [OS=Homo sapiens]	1	1972.97	1.49	1.113	0.683	1.097	1.173	66.3	124.9	128.7	87.9	117.3	75	64	64	113.9	95.3	133	120.7	106.1	156.7	124.4	90.2	85	82.3	113.4	55.4	159.6	72.5	52.2	111.2	2098.73	2100.25	3735.86	3126.95	4363.16	3958	3479.06	5139.05	4079.34	2958.08	2788.03
[R].SSKELLLQPVTISR.[N]	1xBiotin [K3]	3	1	P59998	P59998 [42-55]	P59998 1xBiotin [K44]	Actin-related protein 2/3 complex subunit 4 [OS=Homo sapiens]	1	1796.99	0.799	0.952	1.057	1.189	1.172	152.6	97.3	92.6	96.9	77.9	82.7	89	150.7	150.4	149.8	95.9	71.1	72.8	124.5	91.3	83.5	131.6	95.5	85.5	76.8	72.6	96	81.5	81.2	2390.43	4045.33	4037.86	4022.65	2575.3	1909.93	1953.75	3343.21	2451.78	2241	3533.61
[R].SWTAADMAAQITKR.[K]	1xBiotin [K13]	8	1	P04439	P04439 [156-169]	P04439 1xBiotin [K168]	HLA class I histocompatibility antigen, A-3 alpha chain [OS=Homo sapiens]	1	1775.86	1.088	0.931	0.714	1.255	1.161	115.3	125.3	116.6	75.3	93	74.5	126.1	110	69.4	75.5	202.2	119.6	93.1	111.3	155.2	110.9	71.9	70.9	88.7	80.8	96.7	61	71.1	85.7	4160.86	3629.38	2288.23	2490.33	6671.82	3945.78	3072.04	3672.16	5122.37	3657.5	2371.38
[K].KDVDAAYMNK.[V]	1xBiotin [K1]	8	1	P04259; P02538; P13647	P04259 [272-281]; P02538 [272-281]; P13647 [277-286]	P04259 1xBiotin [K272]; P02538 1xBiotin [K272]; P13647 1xBiotin [K277]	keratin, type II cytoskeletal 6B [OS=Homo sapiens] Keratin, type II cytoskeletal 6A [OS=Homo sapiens] keratin, type II cytoskeletal 5 [OS=Homo sapiens]	1	1380.63	1.047	1.418	0.618	1.445	1.15	95.6	100	141.8	85.2	103.4	74	71.9	116.7	95.2	99.7	98	114.4	98.9	168.6	141.3	104.1	84.9	70.5	103	116.7	63.7	73.8	57.9	120.5	2350.38	3813.57	3112.66	3258.62	3202.69	3739.27	3231.9	5508.75	4619.35	3403.11	2774.92
[R].VKTNVPVK.[L]	1xBiotin [K2]	2	1	Q9UKM9-1	Q9UKM9-1 [158-165]	Q9UKM9-1 1xBiotin [K159]	RNA-binding protein Raly [OS=Homo sapiens]	1	1110.63	1.049	1.293	2.382	1.493	1.118	58.3	61.1	79.1	188.3	44.7	168.5	62.3	65.2	54.2	76.1	43.1	65.4	84.5	85.8	64.4	77.2	201.4	296.7	79.5	43.1	47.8	77.5	180.2	195.7	2907.37	3042.27	2530.53	3551.73	2009.39	3050.08	3943.79	4000.5	3002.05	3600.62	9394.38
[K].FIDTTSKFGHGR.[F]	1xBiotin [K7]	2	1	P39023	P39023 [367-378]	P39023 1xBiotin [K373]	60S ribosomal protein L3 [OS=Homo sapiens]	1	1591.77	0.677	1.048	1.713	0.541	1.11	102.7	69.5	72.8	124.7	134.4	95.9	106.1	97.1	133	71.8	52.5	100.7	77.7	75.2	69.1	128.8	80.2	150	50.5	138.9	161.4	72.3	99.1	135.8	21588.3	19752.3	27068	14605.6	10692.9	20500.3	15807.1	15304.7	14064.2	26219.4	16320.8
[R].HQGVMVGMGQKDSYVGDEAQSK.[R]	1xBiotin [K11]	6	4	P60709	P60709 [40-61]	P60709 1xBiotin [K50]	Actin, cytoplasmic 1 [OS=Homo sapiens]	1	2577.15	1.444	0.794	0.575	2.16	1.107	100.6	145.2	138.5	79.6	64.1	71.9	102.4	105.2	100.8	94.4	147.8	240.3	75	167.2	141	81	58	88.3	49.6	75.5	65.3	59	76	73.2	3585.97	3684.74	3531.57	3307.75	5177.09	8416.39	2626.05	5856.38	4936.99	2837.67	2031.15
[K].VVKALDYEQLQSVK.[L]	1xBiotin [K3]	1	1	P32926	P32926 [331-344]	P32926 1xBiotin [K333]	Desmoglein-3 [OS=Homo sapiens]	1	1845.98	1.141	0.943	1.202	1.422	1.107	74.3	84.7	110.9	133.2	76.5	120.4	57.1	77	121.5	71.5	87.9	124	116.6	115	67.4	202.2	138.2	65	79.4	61.8	82	128.8	79.6	124.9	1820.62	2454.42	3872.92	2278.78	2799.3	3952.18	3715.24	3664.06	2147.76	6441.78	4404.16
[K].LVSSTLFGNTKPR.[K]	1xBiotin [K11]	1	10	Q14512	Q14512 [150-162]	Q14512 1xBiotin [K160]	Fibroblast growth factor-binding protein 1 [OS=Homo sapiens]	0	1645.87	1.111	1.105	0.433	0.929	1.09	105.6	117.3	129.7	56.2	139.6	51.5	50.8	104.9	140.6	91.7	116.6	131.4	96.2	128.8	168.1	50.1	69	55.8	124.9	138.7	145.8	33.6	51.2	101.8	3636.24	7515.26	10064.9	6568.95	8346.34	9412.27	6890.12	9223.69	12036.9	3584.62	4941.29
[R].ITLSKHQNVQLPR.[E]	1xBiotin [K5]	3	13	P26599	P26599 [406-418]	P26599 1xBiotin [K410]	Polypyrimidine tract-binding protein 1 [OS=Homo sapiens]	1	1759.96	0.662	1.271	1.261	0.901	1.083	112.5	72.1	91.7	115.6	101.8	106.3	111.9	94.6	120	63.6	71.8	79.5	91.3	102	79	119.5	106.5	115	101.3	111.2	100.5	128.3	98.4	105.8	33951.1	28712.2	36399.1	19301.1	21775.2	24109.2	27686.8	30949.8	23963.8	36246.7	32313.9
[R].HLKIVYR.[R]	1xBiotin [K3]	1	15	P61927	P61927 [66-72]	P61927 1xBiotin [K68]	60S ribosomal protein L37 [OS=Homo sapiens]	1	1154.65	0.754	0.959	1.432	0.978	1.078	116.3	87.7	84.1	120.4	81.7	109.8	115.8	126.9	96.1	56.6	95.9	87.3	83.7	90.1	78.5	86.1	119.9	144.1	81.3	125.8	80.3	88.8	133.6	109.3	34466.2	37757	28616.6	16841.5	28534.3	25983.1	24919.5	26818	23372.6	25625.4	35675.1
[R].SGKPAELLKMFGIDR.[D]	1xBiotin [K9]; 1xOxidation [M10]	2	26	P29401	P29401 [595-609]	P29401 1xBiotin [K603]	Transketolase [OS=Homo sapiens]	1	1903.98	1.143	0.978	1.036	1.255	1.076	91.4	104.5	102.2	105.9	81.4	114.6	116.7	65.7	83.8	283.9	95.8	55.5	114.2	93.7	91.4	118.3	90.4	97.1	99.2	57.3	74.6	110	47.3	105.1	30608.7	17243.2	21988.6	74492.3	25131.5	14556.8	29959	24578.1	23985.2	31026.6	23706.5
[R].TKYETELNLR.[M]	1xBiotin [K2]	1	4	P02533	P02533 [202-211]	P02533 1xBiotin [K203]	Keratin, type I cytoskeletal 14 [OS=Homo sapiens]	1	1492.75	1.402	0.928	0.693	1.582	1.067	78.8	142.4	132.1	91.6	69.3	85.8	122	68.6	79.3	77.4	143.2	171.1	88.9	132.9	154.8	109.8	92.1	57.5	69.7	118.2	56.2	95.9	86.3	76	4142.06	2328.51	2691.79	2625.85	4861.13	5806.41	3016.68	4508.85	5254.76	3725.26	3126.25
[K].IKIIAPPER.[K]	1xBiotin [K2]	8	32	P60709	P60709 [327-335]	P60709 1xBiotin [K328]	Actin, cytoplasmic 1 [OS=Homo sapiens]	1	1262.73	1.016	1.167	0.539	0.925	1.063	103.4	105.1	122.6	69.5	134	65.4	96.4	116.4	102.2	91.3	123.9	103.9	117.3	121.2	140.5	63.2	68.7	69.7	152	132.4	109.8	71.7	64.6	54.7	84845.1	102499	90006	80412.8	109105	91439.2	103243	106685	123713	55676	60480.4
[K].KHLEINPDHSIIETLR.[Q]	1xBiotin [K1]	2	1	P07900	P07900 [632-647]	P07900 1xBiotin [K632]	Heat shock protein HSP 90-alpha [OS=Homo sapiens]	1	2141.12	1.566	0.906	0.867	1.065	1.061	74.7	124.5	112.9	97.9	105.9	84.2	60.3	74.4	92.6	86.6	124.1	145	105.1	112.5	122.5	80.2	97.5	109.6	105.6	123.3	92.8	75.6	108.4	83.9	1801.44	2222.76	2767.27	2587.15	3707.19	4332.38	3138.83	3360.53	3660.41	2395.81	2913.58
[R].TNSTFNQVVLKR.[L]	1xBiotin [K11]	2	3	Q07020	Q07020 [39-50]	Q07020 1xBiotin [K49]	60S ribosomal protein L18 [OS=Homo sapiens]	1	1632.85	0.873	1.538	0.794	1.346	1.061	93.5	65.8	135.4	105.8	99.7	99.8	70.1	89.3	104.9	61.2	107.4	62.8	94	129.2	130.9	98.8	101	103.9	223.8	69.9	95.2	95.2	59.3	103	2561.29	3262.5	3835.63	2235.51	3927.1	2295.68	3437.14	4722.64	4783.43	3612.04	3692.13
[K].TFTVQKGISSK.[K]	1xBiotin [K6]	1	6	P32926	P32926 [389-399]	P32926 1xBiotin [K394]	Desmoglein-3 [OS=Homo sapiens]	1	1421.75	0.975	1.306	0.343	0.902	1.056	138.5	91.4	141.9	48.7	143.3	36.2	48.6	151.8	141.6	93.5	89	148	153.1	116.2	145.1	31	53.3	49.8	138.2	146.6	169.7	37	50.5	37	3796.1	11851.5	11059.8	7302.54	6947.94	11558.8	11954.7	9076.51	11330	2423.16	4161.42
[R].DLYDAGVKR.[K]	1xBiotin [K8]	2	3	P07355	P07355 [197-205]	P07355 1xBiotin [K204]	Annexin A2 [OS=Homo sapiens]	1	1262.62	2.288	0.912	0.278	2.055	1.054	85.5	195.5	178.3	38.5	65.8	36.5	44.7	87.8	110.5	123.3	200.9	217.7	190.6	130.9	183.1	36.4	82.2	39.5	63.7	96.4	67.6	35.8	37.5	51.2	2493.74	4893.64	6158.76	6872.57	11194.4	12133.4	10621.6	7295.66	10205.5	2030.8	4579.28
[R].LVKETR.[I]	1xBiotin [K3]	1	2	O00622	O00622 [260-265]	O00622 1xBiotin [K262]	Protein CYR61 [OS=Homo sapiens]	1	971.534	0.641	1.074	0.385	0.73	1.053	155.7	100.3	107.7	42.6	153.3	40.5	163.9	140.6	172.9	80.7	105.6	110.8	118	103.2	113.4	21.8	44.9	45.4	161.6	161.4	130.8	13.7	68.7	42.6	26581.2	22795.2	28032.6	13080.2	17120.7	17969.5	19131	16738	18379.2	3531.79	7273.74
[K].NSTFSEIFKK.[E]	1xBiotin [K9]	2	2	P29401	P29401 [344-353]	P29401 1xBiotin [K352]	Transketolase [OS=Homo sapiens]	1	1426.7	1.045	1.392	0.601	0.546	1.052	66.1	81.2	113	67.9	207.1	64.6	109.3	54.9	65.1	88.3	80	57.4	111.3	119.2	110.6	100.8	52.3	66.9	62.8	327.2	204	70.3	56.1	63.6	3601.93	1809.93	2145.88	2908.88	2634.84	1891.76	3668.12	3927.07	3644.11	3320.98	1723.06
[R].LPLQDVYKIGGIGTVPVGR.[V]	1xBiotin [K8]	4	4	P68104	P68104 [248-266]	P68104 1xBiotin [K255]	Elongation factor 1-alpha 1 [OS=Homo sapiens]	1	2208.22	1.787	0.89	0.888	1.807	1.051	73.5	171.2	136	87	49.8	82.5	67	97.5	61.7	70.3	156.2	174.2	76.7	155	124	68.1	154	79.3	42.4	45.4	122.4	64.8	75.2	165.6	3194.96	4645.26	2939.97	3352.34	7441.59	8300.82	3655	7388.64	5908.34	3246.53	7338.86
[K].YIQKQISYNYSDLDQSNVTEETPEGEEHHPVADTENK.[E]	1xBiotin [K4]	2	1	Q8NC51-1	Q8NC51-1 [237-273]	Q8NC51-1 1xBiotin [K240]	Plasminogen activator inhibitor 1 RNA-binding protein [OS=Homo sapiens]	1	4534.03	2.642	0.688	1.197	1.37	1.051	75.9	200.5	79.6	95.3	58.1	90.7	59.7	73.4	50.6	68.4	315	157.8	47.1	230.6	62.6	75	232	57.3	45.7	44.6	69.1	67.1	72.8	71.4	3323.08	4082.99	2817.65	3807.1	17528.1	8780.82	2618.65	12835.1	3485.42	4172.93	12910.5
[R].KWEAAHEAEQLR.[A]	1xBiotin [K1]	1	7	P04439	P04439 [170-181]	P04439 1xBiotin [K170]	HLA class I histocompatibility antigen, A-3 alpha chain [OS=Homo sapiens]	1	1693.81	0.499	1.317	1.125	0.756	1.05	131.3	57.3	80.4	139.2	106.5	85.3	218.6	75.3	119	52	37.5	141.2	127.3	72.9	49.4	143.2	54.5	126.1	126.3	80.3	96.5	136.4	66.2	77.4	794652	273601	432607	188878	136422	513342	462765	265114	179609	520468	198150
[K].LDSGKELHINLIPNK.[Q]	1xBiotin [K5]	3	4	P07900	P07900 [70-84]	P07900 1xBiotin [K74]	Heat shock protein HSP 90-alpha [OS=Homo sapiens]	1	1917.03	1.266	1.047	0.677	1.281	1.049	94.1	119.1	124.7	84.4	97.3	80.4	84.7	92.1	103.9	75.7	146.4	116.6	100.7	144.8	122.1	67.6	135	82.6	79	105.9	95.3	68.9	99.9	78.7	3216.45	3497.5	3943.11	2872.55	5557.7	4427.17	3820.99	5496.4	4633.29	2566.86	5124.86
[R].STLNEIYFGKTK.[D]	1xBiotin [K]	2	16	P47756-1	P47756-1 [226-237]	P47756-1 1xBiotin [K]	F-actin-capping protein subunit beta [OS=Homo sapiens]	1	1626.82	1.257	1.03	1.023	1.17	1.042	84.8	101.4	110.5	106.5	94.5	102.3	79.6	88.2	86.4	100	103.3	111.1	112.6	94.3	114.5	108.6	105.6	117.1	96.3	100.4	67.3	107.8	102.8	104.2	12077.2	13380.7	13110.1	15179	15678.7	16867.5	17097	14306.2	17371.8	16477.9	16032.6
[K].KGQSEEIQK.[K]	1xBiotin [K1]	1	2	P83731	P83731 [61-69]	P83731 1xBiotin [K61]	60S ribosomal protein L24 [OS=Homo sapiens]	1	1272.63	1.31	1.542	0.615	2.457	1.041	78.6	102.9	158.7	97.6	65.6	96.5	54.1	86.1	108.2	46	112.8	151.3	173.9	178.6	131.7	107	114.1	78.3	51.1	72.7	71.9	109.6	46.9	105.8	2049.17	3258.99	4096.49	1740.14	4269.76	5726.21	6583.96	6762.43	4984.96	4049.66	4320.31
[R].VKLLLQVQHASK.[Q]	1xBiotin [K2]	3	2	P12236	P12236 [32-43]	P12236 1xBiotin [K33]	ADP/ATP translocase 3 [OS=Homo sapiens]	1	1589.92	1.438	0.889	0.569	2.025	1.039	106.2	152.8	134	77.5	66.2	63.4	45.5	141.6	102.4	156.8	147.4	137.5	129.2	145.9	122.2	83	74.8	51.4	63.8	33.2	173.3	51.1	61.2	79.8	2392.97	7446.57	5388.02	8245.04	7749.79	7229.87	6796.3	7674.7	6424.47	4363.46	3933.72
[K].WIEAGPVVLKHPASEAEIQPQTQVTLR.[C]	1xBiotin [K10]	6	6	Q13308-1	Q13308-1 [123-149]	Q13308-1 1xBiotin [K132]	Inactive tyrosine-protein kinase 7 [OS=Homo sapiens]	1	3223.69	1.133	0.868	0.483	1.855	1.036	87.4	141.1	169.1	78.5	48.1	75.8	61	74.7	267.5	69.1	180.9	120.6	59.9	144.5	145.1	51.8	67.1	70	41.1	32.3	219.6	64.8	32.1	97.8	3602.84	4413.43	15808.8	4082.15	10694.8	7127.15	3542.37	8542.51	8577.11	3059.34	3968.24
[K].SSKGGPGSAVSPYPTFNPSSDVAALHK.[A]	1xBiotin [K3]	1	1	P04083	P04083 [27-53]	P04083 1xBiotin [K29]	annexin A1 [OS=Homo sapiens]	1	2884.39	2.016	0.669	1.197	1.009	1.032	66.7	134.4	90	107.7	96.9	104.3	93.1	65.9	60.6	69.9	132.8	234.4	110	66.1	88.9	106.4	107	99.4	109	95.8	57.3	89.7	103.1	110.6	2955.5	2091.75	1922.44	2220.64	4216.83	7441.29	3492.31	2099.42	2822.58	3378.06	3395.93
[K].TVDGPSGKLWR.[D]	1xBiotin [K8]	2	21	P04406-1	P04406-1 [187-197]	P04406-1 1xBiotin [K194]	glyceraldehyde-3-phosphate dehydrogenase [OS=Homo sapiens]	1	1441.73	1.219	1.197	0.735	1.063	1.029	88.1	107.5	128.7	87.8	104.9	83	90.6	84	88.9	83.4	108.4	114	105.6	133.7	129.8	79.3	98.2	88.6	125.8	105.8	102.7	95.5	83.7	81.9	22685.7	21036.1	22266.2	20869.7	27150.8	28549.1	26440	33475.8	32509.5	19859.6	24595.5
[K].EITALAPSTMKIK.[I]	1xBiotin [K]	7	12	P60709	P60709 [316-328]	P60709 1xBiotin [K]	Actin, cytoplasmic 1 [OS=Homo sapiens]	1	1628.88	1.36	1.069	0.808	1.191	1.018	84.2	114.5	128.8	82.9	108.2	81.4	40.3	88.1	116.5	67.8	119.8	141.4	72.4	140.7	134.8	86.7	113.6	76.5	113.2	116.7	100.7	72.1	113.4	85.1	9403.33	20541.5	27160.3	15799.6	27931.7	32977.9	16889.4	32813.4	31427.6	20210	26496.8
[K].KSQIFSTASDNQPTVTIK.[V]	1xBiotin [K1]	1	3	P11021	P11021 [447-464]	P11021 1xBiotin [K447]	78 kDa glucose-regulated protein [OS=Homo sapiens]	1	2191.11	1.241	0.741	1.057	1.01	1.01	97.4	120.9	96.1	101.6	84.5	99.5	83.7	100.2	98.9	90.3	122.8	163.5	66.9	112.3	97.6	114	103.2	72	85.9	111.1	68.2	112.9	95.6	101	3009.28	3600.11	3554.71	3244.32	4412.64	5874.35	2405.4	4034.07	3508.05	4095.48	3708.74
[R].AKHHAISAK.[L]	1xBiotin [K2]	3	2	P27824	P27824 [126-134]	P27824 1xBiotin [K127]	Calnexin [OS=Homo sapiens]	1	1188.63	2.677	0.802	0.756	2.724	1.01	56.6	170.1	136.5	93.8	50.1	92.9	50	111.1	55.9	133.9	168.1	181.7	134.8	153	93.3	92.7	70.5	142.7	49.5	40.8	52.2	91.8	94.8	83.2	2185.11	4853.44	2443.55	5849.09	7344.25	7941.25	5890.58	6685.91	4075.72	4048.3	3081.95
[K].EFSGNPIKVSFATR.[R]	1xBiotin [K8]	2	2	P35637-1	P35637-1 [358-371]	P35637-1 1xBiotin [K365]	RNA-binding protein FUS [OS=Homo sapiens]	1	1778.89	1.077	1.231	0.663	1.273	1.008	101.1	121.3	97.8	80.1	120.3	79.4	70.6	140.9	98.7	76	134	118.4	93.6	206.8	95.5	89	78.2	62	73.6	117.4	118.4	59.9	89.4	77.6	2063.46	4115.29	2884.77	2221.77	3915.09	3459.55	2735.05	6043.3	2790.72	2600.58	2283.71
[R].TEVTSKMFQK.[T]	1xBiotin [K6]	5	3	P16144-1	P16144-1 [383-392]	P16144-1 1xBiotin [K388]	Integrin beta-4 [OS=Homo sapiens]	1	1424.69	0.832	0.863	0.665	0.941	1.006	145.7	121.2	104.7	66.8	92.5	69	66.2	154.3	213.7	76.2	136.7	128.4	42.6	118.9	110.8	79.1	70.8	64.8	45.3	184.8	98	57.8	73.1	78.6	2674.79	6238.12	8639.13	3079.22	5527.09	5190.81	1722.96	4808.85	4481.81	3198.98	2862.13
[K].IYKIGQGYLIK.[D]	1xBiotin [K3]	1	1	P39023	P39023 [284-294]	P39023 1xBiotin [K286]	60S ribosomal protein L3 [OS=Homo sapiens]	1	1521.85	1.089	0.988	0.677	1.15	1.002	96.3	123.9	117.9	79.8	102.4	79.7	124.8	99.6	53.3	58.1	128.3	129.8	117	122	128.3	87.1	66.7	82.6	106	101.7	157.4	56.7	98.1	82.4	4080.43	3257.74	1743.42	1899.28	4193.24	4244.94	3824.59	3989.39	4194.64	2847.49	2180.2
[R].KTVGVEPAADGK.[G]	1xBiotin [K1]	5	3	P46779	P46779 [47-58]	P46779 1xBiotin [K47]	60S ribosomal protein L28 [OS=Homo sapiens]	1	1397.71	2.895	1.298	0.542	1.411	1.001	37.6	137.8	147.6	80	117	79.9	59.9	33.3	39.1	143.6	96.3	151.1	196.2	135.1	153.8	83.4	36.9	115.3	121.9	139	59.9	52.1	99.8	83.3	3393.65	1885.41	2217.19	8132.89	5458.01	8561.38	11114.8	7654.31	8713.14	4723.79	2090.36
[K].IKGEHPGLSIGDVAK.[K]	1xBiotin [K2]	2	3	P09429	P09429 [113-127]	P09429 1xBiotin [K114]	High mobility group protein B1 [OS=Homo sapiens]	1	1746.92	3.22	0.982	0.494	3.133	1.001	55.5	178.9	175.6	76.1	48	65.9	48.7	65.1	68.4	49.6	224.5	209.6	54.5	205.8	217.8	48	107.7	89.1	49.1	69.5	56.2	107.6	51.6	77.2	1792.29	2397.87	2518.35	1827.02	8270.14	7721.84	2009.37	7580.37	8024.3	1767.4	3966.07
[R].DHKGLYTGR.[C]	1xBiotin [K3]	4	4	Q16787-1	Q16787-1 [66-74]	Q16787-1 1xBiotin [K68]	Isoform 1 of Laminin subunit alpha-3 [OS=Homo sapiens]	1	1272.62	1.6	1.301	0.524	1.514	0.99	72.1	115.4	150.2	78.8	103.8	79.6	63.5	71	83.3	85.6	150.2	113.6	145.5	147.9	167.5	44.2	77.5	124.8	92.5	110.7	102.2	53.2	78.3	88.5	3732.2	4172.03	4893.38	5029.27	8823.96	6676.51	8552.28	8689.4	9843.31	2598.94	4556.67
[K].VILHLKEDQTEYLEER.[RW]	1xBiotin [K6]	5	3	P07900; P08238	P07900 [186-201]; P08238 [181-196]	P07900 1xBiotin [K191]; P08238 1xBiotin [K186]	Heat shock protein HSP 90-alpha [OS=Homo sapiens] Heat shock protein HSP 90-beta [OS=Homo sapiens]	1	2241.12	3.101	0.758	0.571	1.719	0.982	57.9	182.8	138.5	66.3	78.5	76	54.1	54.5	67	136.8	171.8	207.8	101.2	130.2	179.2	102.7	57.8	62.3	70.5	73.8	104.3	71.5	104.5	50.2	2071.38	2085.41	2566.39	5237.76	6577.46	7957.77	3872.96	4984.45	6862.42	3930.28	2213.02
[K].WSLLQQQKTAR.[S]	1xBiotin [K8]	2	3	P05787	P05787 [123-133]	P05787 1xBiotin [K130]	Keratin, type II cytoskeletal 8 [OS=Homo sapiens]	1	1584.83	1.342	1	0.635	1.227	0.981	81.3	129.9	129.9	77.8	105.8	75.4	111.8	79.4	65.8	84.7	150	126.9	96.8	126.9	144.5	61.4	76.1	109.7	103.4	113.6	97.5	115.1	62.6	73.7	3770.91	2679.12	2221.3	2856.21	5059.48	4281.77	3264.73	4282.12	4874.8	2072.34	2565.65
[K].YIDQEELNKTKPIWTR.[N]	1xBiotin [K]	5	2	P07900; P08238	P07900 [284-299]; P08238 [276-291]	P07900 1xBiotin [K]; P08238 1xBiotin [K]	Heat shock protein HSP 90-alpha [OS=Homo sapiens] Heat shock protein HSP 90-beta [OS=Homo sapiens]	1	2260.14	2.144	0.834	0.597	1.435	0.98	85.2	148.8	134	67.9	93.4	70.8	63.5	84.4	86.6	143	147.4	185.6	83.7	154.9	132.8	58.7	92.5	67.3	92.5	88.4	95.9	70.2	94.3	58.2	2707.07	3597.71	3688.58	6094.42	6281.51	7910.07	3568.07	6598.76	5656.61	2499.67	3939.73
[K].KHLEINPDHPIVETLR.[Q]	1xBiotin [K1]	1	6	P08238	P08238 [624-639]	P08238 1xBiotin [K624]	Heat shock protein HSP 90-beta [OS=Homo sapiens]	1	2137.12	2.853	0.787	0.491	2.136	0.973	62.4	188.1	148	72.7	69.3	59.5	56.8	74	67.8	211.2	204.5	122.1	44.4	204.7	160.9	79.1	60.6	82.7	75.3	46.7	95.3	64.7	85	64.2	2734.64	3564.7	3265.34	10169.4	9848.39	5878.3	2137.46	9859.56	7749.78	3807.34	2919.31
[R].NGNPAPKITWYR.[N]	1xBiotin [K7]	1	15	P50895	P50895 [176-187]	P50895 1xBiotin [K182]	Basal cell adhesion molecule [OS=Homo sapiens]	1	1642.82	0.762	1.419	0.407	1.077	0.973	137.8	89.2	134.6	49.8	125	63.6	112.9	142.3	146	86	115	92.1	99.7	163.1	139	51.4	66.4	51.1	99.8	148.2	129	24.1	65.7	68.2	17050.8	21488.8	22046.1	12993.9	17362.8	13903.2	15062.2	24634.2	20989.9	7760.81	10026.6
[K].AVGKVIPELNGK.[L]	1xBiotin [K4]	2	20	P04406-1	P04406-1 [216-227]	P04406-1 1xBiotin [K219]	glyceraldehyde-3-phosphate dehydrogenase [OS=Homo sapiens]	1	1450.81	1.295	0.985	1.066	0.924	0.966	79.9	115.4	95.3	101.9	102	105.5	65.2	93.1	80.4	76.2	120.7	116.1	85	118.8	95.9	90.6	102.5	107.5	102.6	128.6	102.6	91.5	116.6	106.1	11079.3	15820.9	13654.5	12934.5	20495.6	19718.3	14436.7	20182	16293.3	15384.8	17413.4
[K].GILAADESTGSIAKR.[L]	1xBiotin [K14]	2	6	P04075	P04075 [29-43]	P04075 1xBiotin [K42]	fructose-bisphosphate aldolase A [OS=Homo sapiens]	1	1714.88	1.263	1.222	0.462	1.048	0.962	89.8	113.4	138.5	56.2	132.2	70	90.9	79.3	103	80	114.8	138.5	123	145.5	140.3	56.8	82.3	56.9	75.5	171.1	133.9	59	78.5	70.9	3827.19	3341.02	4335.45	3366.79	4834.44	5830	5176.96	6125.24	5907.3	2391.09	3465.76
[K].ITYKYTGK.[G]	1xBiotin [K4]	1	11	Q14126	Q14126 [85-92]	Q14126 1xBiotin [K88]	Desmoglein-2 [OS=Homo sapiens]	1	1199.61	0.775	1.194	0.22	0.769	0.96	147.1	113.9	136	30	122.7	50.3	85.5	147.1	183	67.2	114	138.3	93.5	136.1	154.5	17.6	54.9	30	122.8	212.5	121.6	18.3	52.8	50.3	11682.6	20105.8	24998	9185.32	15576.8	18898.6	12777.7	18598.2	21111	2398.53	7507.28
[R].FCKTTNTVEPLR.[G]	1xBiotin [K3]; 1xCarbamidomethyl [C2]	1	5	Q14210	Q14210 [44-55]	Q14210 1xBiotin [K46]	Lymphocyte antigen 6D [OS=Homo sapiens]	1	1691.82	0.831	1.285	0.431	0.732	0.954	109.1	90.7	124.3	53	169.7	53.3	77.7	111.5	184	83.8	107.2	92.7	137.9	94.1	127	45	54.2	59.4	173.4	188.2	83.2	54.5	47.2	79	3703.48	5313.09	8767.39	3991.83	5110.2	4415.75	6569.16	4483.94	6052.72	2144.9	2581.76
[K].GTLVQTKGTGASGSFK.[L]	1xBiotin [K7]	5	8	P16401; P10412	P16401 [94-109]; P10412 [91-106]	P16401 1xBiotin [K100]; P10412 1xBiotin [K97]	Histone H1.5 [OS=Homo sapiens] Histone H1.4 [OS=Homo sapiens]	1	1764.89	4.078	0.988	0.096	3.587	0.953	52.7	214.8	212.3	20.4	67.4	32.6	21.7	64.5	50.8	187.1	207.3	225.1	235.8	204.9	181.1	16.7	145.9	19.7	65	65.7	27.8	17.6	31.4	31.7	2619.16	7804.68	6147.61	22630.2	25072.4	27229.1	28519.2	24778.5	21907.8	2023.62	17647.3
[K].KTSGVVR.[L]	1xBiotin [K1]	4	1	Q16787-1	Q16787-1 [1134-1140]	Q16787-1 1xBiotin [K1134]	Isoform 1 of Laminin subunit alpha-3 [OS=Homo sapiens]	1	972.53	1.578	1.377	0.318	0.981	0.947	70.9	111.9	154.4	43.2	174	45.6	20.9	70.3	95.9	110.9	87.9	141.3	194.1	121.1	153.1	61.7	42.8	42.5	172.5	197.8	117.1	45.2	81.2	43.8	1797.36	6044.89	8244.57	9539.42	7560	12152.1	16697.1	10412	13165	5303.98	3680.02
[K].LNILKLAPGGHVGR.[F]	1xBiotin [K5]	1	2	P36578	P36578 [235-248]	P36578 1xBiotin [K239]	60S ribosomal protein L4 [OS=Homo sapiens]	1	1670.95	1.47	0.969	0.69	1.127	0.946	91.4	134.3	96	79.2	115.4	83.7	92.8	122.2	47.6	90.8	145.6	136.5	97.5	193.5	88	80.4	60.7	84.1	117.3	78	128.6	96.2	85	55.1	3831.87	5045.78	1966.08	3747.57	6010.28	5633.48	4026.24	7987.44	3631.56	3320.66	2507.18
[K].NLGIGKVSSFEEK.[M]	1xBiotin [K6]	2	4	P40926	P40926 [302-314]	P40926 1xBiotin [K307]	Malate dehydrogenase, mitochondrial [OS=Homo sapiens]	1	1633.83	1.319	1.176	0.682	1.999	0.942	109.1	111.6	126.7	102.3	64.3	85.9	35.2	111.4	103.7	106.1	101.9	147	178.7	120.4	119.8	121.8	97.2	64.1	61.1	89.4	49.5	81.5	81.7	129.3	1795.69	5683.18	5292.39	5411.06	5200.75	7498.15	9119.15	6143.39	6113.79	6216.25	4961.28
[R].SKGQESFK.[K]	1xBiotin [K2]	2	2	P06748	P06748 [222-229]	P06748 1xBiotin [K223]	Nucleophosmin [OS=Homo sapiens]	1	1136.54	2.076	0.797	0.551	1.278	0.937	74.1	148.8	118.6	63.9	102.7	91.8	67.3	105.4	52.6	112.1	218.8	135.2	107.7	103.9	146.7	58.1	57.2	105.4	81.3	93.3	108.9	101.9	61.1	83.4	2444.29	3825.57	1909.3	4068.42	7943.69	4907.03	3909.77	3771.5	5325.94	2108.43	2077.3
[K].NLDTVKGSSLHVGSDLLK.[F]	1xBiotin [K6]	1	4	O15031	O15031 [691-708]	O15031 1xBiotin [K696]	Plexin-B2 [OS=Homo sapiens]	1	2109.1	0.982	1.262	0.418	2.022	0.936	118.8	116.6	154.5	64.6	76.4	69.1	107.3	113.5	143.3	82.4	111.4	183.5	57.2	231.6	147.6	60.2	61.7	72.6	73	50.6	89	95.3	66	53.8	3813.01	4031.21	5092.08	2927.41	3958.93	6519.25	2030.82	8227.69	5243.57	2139.11	2192.71
[R].ASGDAKIK.[K]	1xBiotin [K6]	1	1	P11387	P11387 [96-103]	P11387 1xBiotin [K101]	DNA topoisomerase 1 [OS=Homo sapiens]	1	1015.52	0.923	1.006	0.988	0.345	0.934	80.4	74.4	74.9	74	217.2	79.2	71.1	104.5	74.2	96.4	45.7	68.7	69.2	53.3	78	68.3	43.2	102.2	71.7	200.6	425	62.3	73.1	92.5	2823.37	4148.82	2947.2	3827.78	1813.41	2729.36	2746.15	2114.53	3097.18	2712.02	1716.04
[K].FVSFPTQVLAKASK.[V]	1xBiotin [K11]	5	2	Q8TB61	Q8TB61 [206-219]	Q8TB61 1xBiotin [K216]	Adenosine 3'-phospho 5'-phosphosulfate transporter 1 [OS=Homo sapiens]	1	1748.94	1.08	0.632	1.39	0.9	0.932	92.1	110.7	67.7	96	114.7	118.8	90.7	88.1	122.5	109	95.2	128.7	60.1	123	66.7	117.8	94.5	83.6	112.9	66.8	122.7	116.9	126.4	74.2	2819.76	2738.55	3808.65	3390.01	2958.37	4002.49	1869.27	3825.03	2072.13	3662.86	2939.04
[K].TAKTNTNEFLIDVDK.[G]	1xBiotin [K3]	1	8	P13726-1	P13726-1 [199-213]	P13726-1 1xBiotin [K201]	tissue factor [OS=Homo sapiens]	1	1934.95	0.727	0.903	0.459	0.67	0.931	140.1	88.5	105.9	48.2	162.8	54.5	54.5	156.8	199.2	71.8	99	144.9	52.2	118.5	130.8	54	51.5	60	48.8	195.2	182.2	55	64.5	61	2407.99	6923.6	8796.05	3168.25	4370.75	6397.17	2306.26	5233.36	5774.04	2382.21	2273.1
[R].LAAIVAKQVLLGR.[K]	1xBiotin [K7]	1	3	P40429	P40429 [19-31]	P40429 1xBiotin [K25]	60S ribosomal protein L13a [OS=Homo sapiens]	1	1577.96	1.645	0.694	0.859	1.304	0.925	95.2	147.3	102.3	87.9	72.4	95	102.6	93.3	76.5	125.9	186.6	144.3	100.2	139.9	66.9	97.7	71.9	86.1	64.5	107.3	70.9	93.1	112	60.2	3229.09	2936.85	2408.95	3963.15	5875.5	4543.66	3155.34	4404.88	2106.45	3075.41	2263.55
[K].IVLQKYHTINGHNAEVR.[K]	1xBiotin [K5]	2	1	P22626	P22626 [169-185]	P22626 1xBiotin [K173]	heterogeneous nuclear ribonucleoproteins A2/B1 [OS=Homo sapiens]	1	2218.15	1.17	0.922	0.669	1.804	0.925	119.6	131	128.2	85.8	70.1	65.2	127.3	120	71.2	104.8	148.9	131.3	95.9	137.3	128.6	86.1	60	93	115.3	53.2	70.3	64.8	65.4	126.8	4139.84	3902.87	2314.77	3410.66	4842.52	4272.07	3118.72	4464.68	4183.49	2799.43	1950.73
[R].ILGPGLNKAGK.[F]	1xBiotin [K8]	1	1	P62906	P62906 [123-133]	P62906 1xBiotin [K130]	60S ribosomal protein L10A [OS=Homo sapiens]	1	1293.73	0.797	1.006	0.607	1.258	0.921	145.1	115.6	116.3	79	92.5	51.5	40.9	146.4	166.6	101	116.7	121.9	92.5	153	117.4	79.8	92.9	46.4	45.3	93.3	131.2	152.3	52	50.3	1742.73	6247.17	7107.27	4306.89	4978.25	5202.2	3947.67	6528.36	5006.56	3402.79	3964.58
[K].LTPEYLELKK.[Y]	1xBiotin [K]	1	2	O75477	O75477 [276-285]	O75477 1xBiotin [K]	erlin-1 [OS=Homo sapiens]	1	1459.79	1.324	1.147	0.864	0.714	0.921	68.9	91.2	104.6	90.5	146.6	98.2	66.4	62.3	53	146.3	82.5	61.9	58.2	196.1	94.6	104.5	61.8	81.8	207.2	115.9	132.5	101.7	84.7	88.8	2373.67	2225.76	1895.56	5231.49	2947.6	2211.12	2079.1	7010.44	3380.98	3733.93	2210.26
[R].SGKPAELLK.[M]	1xBiotin [K3]	2	11	P29401	P29401 [595-603]	P29401 1xBiotin [K597]	Transketolase [OS=Homo sapiens]	0	1168.64	0.868	0.894	1.026	0.687	0.917	105.4	92.2	87.5	89.7	127.4	97.8	103.8	121	99.9	86.8	90.8	103.7	86.1	77.5	91.5	82.6	88.3	92.4	157.5	125.3	111.8	105.7	96.3	79	31777.6	37055.1	30604.6	26569	27790.7	31748.5	26358.9	23742.2	28022.3	25286.9	27033.8
[K].NQVALNPQNTVFDAKR.[L]	1xBiotin [K15]	2	1	P0DMV8	P0DMV8 [57-72]	P0DMV8 1xBiotin [K71]	heat shock 70 kDa protein 1A [OS=Homo sapiens]	1	2041.03	0.85	1.17	0.866	1.062	0.913	99.4	83.6	130	96.4	85.1	105.4	83.6	134	99	83.2	77.8	113.9	133.3	67.2	129.4	115.4	68.9	96	63.3	131.7	84.7	126.4	104.9	87.4	2588.02	4144.64	3062.65	2575.45	2406.96	3523.57	4122.98	2079.2	4005.15	3569.49	2131.01
[K].LKPEDITQIQPQQLVLR.[L]	1xBiotin [K2]	5	4	P05556-1	P05556-1 [106-122]	P05556-1 1xBiotin [K107]	Integrin beta-1 [OS=Homo sapiens]	0	2245.24	0.716	1.111	0.441	0.722	0.911	139.1	99.5	110.6	48.7	153.2	48.8	45.7	206.2	149.8	55.4	135.1	107.2	48.2	169.1	119.1	52.6	34.9	52.5	114.9	165	184.7	49.4	52.6	57.7	3120.18	14072.8	10225.7	3781.66	9221.9	7316.84	3290.86	11542.4	8126.88	3588.86	2381.22
[R].KFLDGIYVSEK.[G]	1xBiotin [K1]	1	6	P32969	P32969 [174-184]	P32969 1xBiotin [K174]	60S ribosomal protein L9 [OS=Homo sapiens]	1	1524.78	1.043	1.203	1.64	0.886	0.911	67.9	73.6	88.5	145.2	97.7	127.1	72.3	90.9	40.9	31.1	78.3	94.7	74.3	101.7	94.3	34.4	169.8	154.6	104	114.7	97.9	124.5	186.4	135.4	3993.85	5021.91	2260.15	1716.9	4330.89	5235.95	4106.86	5619.04	5211.36	1899.58	9384.02
[K].FVLSSGKFYGDEEKDK.[G]	1xBiotin [K7]	1	1	P27797	P27797 [49-64]	P27797 1xBiotin [K55]	Calreticulin [OS=Homo sapiens]	2	2074.98	1.478	0.95	0.761	1.24	0.91	64.6	120.5	114.4	87	92.3	121.2	62.6	100.3	63.7	92.6	118.8	127.3	56.2	112.8	194	85.8	113.2	84.1	108	90.9	91	119.5	54.9	124.3	2075.19	3321.95	2109.58	3067.01	3935.4	4218.03	1863.32	3738.45	6425.79	2843.42	3749.44
[R].KSTDSPVECMGQEK.[G]	1xBiotin [K1]; 1xCarbamidomethyl [C9]; 1xOxidation [M10]	1	18	P13726-1	P13726-1 [233-246]	P13726-1 1xBiotin [K233]	tissue factor [OS=Homo sapiens]	1	1837.78	0.49	1.164	0.511	0.649	0.905	183.2	89.7	104.5	53.4	110.2	59	191.5	162.8	126.6	111.2	79.8	60.9	154.5	55.1	92.9	47.5	37	52	237.9	98	85.3	115.5	52.5	39.1	49867.8	42399.3	32959.7	28955.4	20768	15845.4	40222.5	14343.3	24179.5	12354.9	9635.62
[K].FLSGKGLVIYPK.[I]	1xBiotin [K5]	1	3	P98172	P98172 [44-55]	P98172 1xBiotin [K48]	ephrin-B1 [OS=Homo sapiens]	1	1547.87	1.633	1.063	0.574	1.684	0.899	89.9	151.5	127.7	73.3	75.9	81.6	85.6	98	81.9	100.3	144.1	160.1	121.5	170.1	115.6	69.8	118.9	63.9	72.2	93.2	70.7	79.5	77.6	76.9	2935	3362.42	2808.73	3439.41	4944	5491.65	4168.35	5836.25	3964.14	2393.06	4077.56
[K].GQEVSPKVYFMK.[Q]	1xBiotin [K7]	1	7	P09936	P09936 [72-83]	P09936 1xBiotin [K78]	Ubiquitin carboxyl-terminal hydrolase isozyme L1 [OS=Homo sapiens]	1	1638.8	1.53	1.235	0.75	1.373	0.895	57.7	120.4	119	108.4	89.1	105.4	50	62.1	86.4	73.6	129.6	132.2	115.7	163.2	128.1	122.3	116.7	37	95.9	118.9	73	44.9	136.7	113.5	3998.05	4959.07	6902.89	5880.75	10354.8	10561.1	9241.96	13040.2	10235.7	9773.7	9325.52
[K].LQALKDTANR.[L]	1xBiotin [K5]	2	17	P29401	P29401 [12-21]	P29401 1xBiotin [K16]	Transketolase [OS=Homo sapiens]	1	1355.71	0.683	0.994	0.987	0.593	0.892	108.6	74.2	88.2	85.1	148.7	95.3	107.6	101.8	96.4	65.9	69.5	100.9	82.7	65.5	93.7	92.5	79.8	72	230.5	139.5	102.3	138.7	71.1	89.4	26243.8	24838.1	23521.6	16073.5	16964.5	24622.7	20179.5	15975	22856.7	22559.2	19457.8
[K].LIINSLYKNK.[E]	1xBiotin [K]	1	4	P14625	P14625 [88-97]	P14625 1xBiotin [K]	Endoplasmin [OS=Homo sapiens]	1	1431.8	1.494	1.148	0.559	1.362	0.891	84.3	126	144.7	53.7	123	68.2	86.5	91.4	73.4	88.2	129.2	142.5	93.7	181.1	148.4	55.1	109.6	52.4	67.8	133	126.2	70	58.7	92.8	3407.83	3600.98	2891.4	3475.74	5091.82	5613.24	3690.15	7134.66	5846.32	2171.31	4319.17
[K].QKDLSGFYR.[H]	1xBiotin [K2]	1	2	Q9H0G5	Q9H0G5 [177-185]	Q9H0G5 1xBiotin [K178]	Nuclear speckle splicing regulatory protein 1 [OS=Homo sapiens]	1	1339.65	0.811	1.025	1.239	0.277	0.891	76.4	62.1	63.7	78.9	230.2	88.6	55.5	82.2	99.3	68.5	45	66.8	68.5	42.1	82.3	60.2	93.1	84.9	50	247.5	313.6	63.7	95.3	181.5	2450.43	3628.27	4384.77	3025.81	1988.11	2949.92	3024.29	1857.37	3634.59	2659.7	4111.61
[K].SKITVTSEVPFSK.[R]	1xBiotin [K2]	1	5	P35268	P35268 [68-80]	P35268 1xBiotin [K69]	60S ribosomal protein L22 [OS=Homo sapiens]	1	1648.86	1.359	0.847	0.753	0.592	0.889	61.2	145.2	91.8	69.1	155	77.7	60.5	52.6	134.8	71.5	145.5	143.4	82.1	90.7	123.3	67.5	73	68.3	149.8	153.1	160.6	53.2	76.8	93.6	2536.32	2204.42	5650.85	2996.88	6102.77	6012.54	3441.54	3802.39	5168.55	2829.43	3059.16
[R].LTFSVTLKNK.[R]	1xBiotin [K8]	1	1	P17301	P17301 [823-832]	P17301 1xBiotin [K830]	Integrin alpha-2 [OS=Homo sapiens]	1	1376.76	1.108	1.246	0.581	1.038	0.886	105.1	116.4	117.4	68.1	116.1	76.9	105.5	105.2	70.6	116.5	72.9	117.6	146.6	110.1	117.5	125.5	60.6	68.2	116.2	130.2	106	82.1	71.7	77	3281.19	3273.68	2197.22	3625.9	2268.18	3659.16	4560.78	3424.22	3654.85	3905.58	1885.52
[K].VQKLLQDFFNGR.[D]	1xBiotin [K3]	2	3	P0DMV8	P0DMV8 [346-357]	P0DMV8 1xBiotin [K348]	heat shock 70 kDa protein 1A [OS=Homo sapiens]	1	1690.87	1.115	0.974	0.727	1.375	0.885	105.3	117.4	114.4	82.4	84	96.4	85.6	113.9	110.3	123	93.4	136.2	99.3	122.1	119.9	72.2	86.4	98.3	88	88.8	70	80.6	111.1	101	2785.01	3704.38	3585.77	3999.76	3035.87	4429.92	3228.84	3970.22	3897.74	2348.38	2808.23
[K].HVVFGKVK.[E]	1xBiotin [K6]	2	10	P62937	P62937 [126-133]	P62937 1xBiotin [K131]	peptidyl-prolyl cis-trans isomerase A [OS=Homo sapiens]	1	1139.64	0.78	1.065	0.941	0.658	0.885	102.9	83.7	89.1	87.6	138.9	97.7	97.5	131.2	105.5	58.8	85.8	102.4	85.4	100.4	91.4	94.5	89.9	72	142.4	152.6	93.7	106.8	100.2	89.5	21528.5	28991	23310.7	12999.2	18959.5	22623.4	18866.6	22178.2	20184.3	20864.5	19853
[K].NAKGSNYWR.[N]	1xBiotin [K3]	1	2	P30101	P30101 [272-280]	P30101 1xBiotin [K274]	Protein disulfide-isomerase A3 [OS=Homo sapiens]	1	1321.61	1.201	0.824	0.681	1.195	0.879	107.2	126.4	104.1	70.8	87.1	104.4	105.6	98.3	85.3	102.5	176.8	115.8	93.4	134	95.4	64.9	108.1	57.3	59.9	79.9	140.6	65.2	121.2	95.7	3538.98	3293.83	2860.32	3435.09	5925.9	3881.91	3131.38	4489.98	3197.39	2176.43	3621.77
[R].SGGYSSGKQGR.[S]	1xBiotin [K8]	5	27	Q15084-1	Q15084-1 [143-153]	Q15084-1 1xBiotin [K150]	Protein disulfide-isomerase A6 [OS=Homo sapiens]	1	1309.6	1.03	0.895	1.126	0.836	0.879	94	96.8	85.8	99.2	102.6	121.6	100.3	83.8	90	91.5	92.7	100.1	98	82.1	82	110.4	89.6	95	155.8	91.9	98.2	125.6	116.5	96.6	53602.1	44794	48091.4	48917.3	49529.8	53475.3	52376.4	43872.6	43795.5	58997.9	47905.1
[K].HQPTAIIAKTFK.[G]	1xBiotin [K9]	2	25	P29401	P29401 [233-244]	P29401 1xBiotin [K241]	Transketolase [OS=Homo sapiens]	1	1580.86	0.601	0.999	1.04	0.501	0.875	120.7	79.5	79.4	82.1	144.6	93.8	116.9	136.5	119.3	54.7	78.5	82	63.7	78.4	80.5	83.8	76.2	81.1	142.9	160.7	132.1	78.4	141.5	92.6	36153.3	42204.3	36890	16927.8	24279	25371.2	19689.5	24243.7	24907.5	25909.8	23560
[K].NVGKVLLVPGPEK.[E]	1xBiotin [K4]	3	5	Q99536	Q99536 [379-391]	Q99536 1xBiotin [K382]	Synaptic vesicle membrane protein VAT-1 homolog [OS=Homo sapiens]	1	1575.89	1.75	0.915	0.809	0.853	0.872	69.3	121.3	104.8	84.7	122.8	97.1	36.9	71.4	86.8	84.1	139.1	125	127.2	98.7	108	122.8	87.3	53.6	115.6	127.5	126.6	66.7	100.1	122.7	1738.22	3368.34	4096.52	3965.55	6561.72	5894.53	6001.1	4653.6	5091.98	5791.05	4119.12
[K].DSYVGDEAQSKR.[G]	1xBiotin [K11]	6	3	P60709	P60709 [51-62]	P60709 1xBiotin [K61]	Actin, cytoplasmic 1 [OS=Homo sapiens]	1	1580.7	1.29	0.948	0.701	1.467	0.868	109.5	141.2	114.3	80.1	60.7	94.2	76.2	109.8	120.4	75.2	141.6	160.6	71.3	114.7	173	71	80.3	90.8	58.6	60.9	117.9	78.6	104.7	94.4	2581.36	3717.04	4075.54	2544.97	4793.15	5438.36	2413.09	3881.96	5856.88	2403.33	2719.9
[R].WEALDNFINRPVKLIIGDR.[E]	1xBiotin [K13]	2	1	AGIA-fabID; EGFR-fabID	AGIA-fabID [491-509]; EGFR-fabID [511-529]	AGIA-fabID 1xBiotin [K503]; EGFR-fabID 1xBiotin [K523]	Heavy Heavy	1	2495.32	1.095	0.726	1.19	0.925	0.862	108.9	111.6	81	104.8	87.6	106.1	60.7	85.8	86.8	497.9	66.5	87.8	80.1	63.8	57.7	82.5	68.6	84.2	90.1	57.6	68.9	83.6	97.7	79.7	2331.38	3292.35	3332.66	19110.5	2553.93	3371.67	3073.06	2447.04	2212.96	3167.46	2632.48
[-].MSLSNKLTLDK.[L]	1xBiotin [K6]; 1xMet-loss+Acetyl [N-Term]	1	4	P00558	P00558 [1-11]	P00558 1xBiotin [K6]; 1xMet-loss+Acetyl [N-Term]	phosphoglycerate kinase 1 [OS=Homo sapiens]	1	1386.73	1.167	1.119	0.812	1.206	0.861	92.1	106.3	118.9	85.1	98.6	98.9	113.4	49	104.6	57.2	139.7	120.7	71.3	135.4	135	96.7	127.9	57.9	112	116.2	52.8	116.8	81.1	112.3	4035.02	1743.88	3722.38	2035.91	4970.96	4295.05	2535.68	4818.49	4804.46	3439.47	4551.57
[R].LGVKGVLFQPCER.[T]	1xBiotin [K4]; 1xCarbamidomethyl [C11]	1	3	Q07954	Q07954 [2650-2662]	Q07954 1xBiotin [K2653]	prolow-density lipoprotein receptor-related protein 1 [OS=Homo sapiens]	1	1728.89	0.919	1.476	0.52	1.496	0.848	109.7	100.8	148.8	77.4	72.1	91.2	116.7	118.2	101.3	52.5	130.6	107.3	79.3	158.4	176.1	64.8	86.9	82.4	118.4	53	76.7	97.1	59	121.4	3916.65	3968.7	3399.53	1761.5	4382.09	3601.16	2660.26	5315.12	5909.73	2174.45	2918.14
[R].QAGGGGGTGSPKLVALR.[L]	1xBiotin [K12]	1	3	Q13751	Q13751 [755-771]	Q13751 1xBiotin [K766]	Laminin subunit beta-3 [OS=Homo sapiens]	1	1751.92	1.488	0.988	0.558	1.452	0.846	82.3	122.5	138.4	77.3	88.2	91.3	86.7	94.3	84.2	111.3	151.2	129	94.2	145.9	149.3	54.3	81.4	83.1	92.9	83.1	102.9	100.1	59.9	96.2	3258.79	3544.01	3165.11	4182.21	5680.95	4849.13	3539.05	5482.41	5612.32	2042.21	3059.85
[K].AKSETVLTCATGR.[A]	1xBiotin [K2]; 1xCarbamidomethyl [C9]	2	7	P26006	P26006 [896-908]	P26006 1xBiotin [K897]	Integrin alpha-3 [OS=Homo sapiens]	1	1619.79	0.584	1.458	0.51	0.623	0.843	148	66.7	102	52	163.7	67.5	51.2	160.1	148.2	63.4	93.5	66.8	102.1	92.5	102.8	46.9	74.5	52.1	252.8	163.9	132.1	55.6	73.8	67.6	2807.11	8773.51	8124.47	3475.96	5124.34	3659.52	5597	5067.31	5637	2568.98	4084.77
[K].VEAKFINYVK.[N]	1xBiotin [K4]	2	3	P06748	P06748 [264-273]	P06748 1xBiotin [K267]	Nucleophosmin [OS=Homo sapiens]	1	1436.76	1.539	1.114	0.46	1.714	0.843	86	132.3	147.4	67.8	86	80.5	56.8	134.2	81.2	103.9	125	166.9	111.7	189.2	139.3	77.8	64	56.4	81.3	65.7	109	89.3	76	72.4	1975.67	4670.22	2826.55	3616.86	4350.07	5808.9	3888.8	6584.92	4847.22	2706.53	2229.07
[K].GATVVTGGKR.[H]	1xBiotin [K9]	2	7	P51649-1	P51649-1 [403-412]	P51649-1 1xBiotin [K411]	Succinate-semialdehyde dehydrogenase, mitochondrial [OS=Homo sapiens]	1	1171.63	1.061	1.595	0.172	1.058	0.842	40	116.4	185.7	32	187.9	38	190.1	40.5	20.9	117.8	22.2	155.9	208.7	168.4	187.9	50.2	32.4	20.9	197.2	190.2	39.9	100.2	38.4	18.1	18590.4	3956.95	2048.04	11525.4	2173.77	15247.8	20418.4	16467.6	18383.8	4912.86	3164.87
[R].IIGLKPEGVPR.[I]	1xBiotin [K5]	2	5	P54709	P54709 [178-188]	P54709 1xBiotin [K182]	sodium/potassium-transporting ATPase subunit beta-3 [OS=Homo sapiens]	0	1404.8	0.782	1.753	0.451	0.776	0.84	137.3	72.4	126.9	57.3	144.9	61.2	71.4	142.9	142.4	56.3	75.1	111.8	110.7	134.9	131.7	67.5	59.4	35.7	173.8	150.3	148.3	80.3	63.5	44.1	3463.54	6929.79	6903.95	2728.25	3642.07	5421.09	5368.17	6542.55	6384.93	3271	2882.29
[R].KATGPPVSELITK.[A]	1xBiotin [K1]	1	4	P16401	P16401 [37-49]	P16401 1xBiotin [K37]	Histone H1.5 [OS=Homo sapiens]	1	1566.86	2.028	0.887	0.47	1.687	0.84	82.7	147	127.8	74.8	78.7	89.1	38.8	75.5	77.8	78.7	134.2	257.2	116.7	228.1	112.7	68.3	103.3	53	66.8	71.9	90.1	63.5	81.4	82	1751.04	3406.01	3508.17	3550.77	6054.89	11604.9	5263.53	10292.2	5085.77	3082.79	4660.73
[R].LNVFAKPEATEVSPNK.[G]	1xBiotin [K6]	1	14	P50895	P50895 [141-156]	P50895 1xBiotin [K146]	Basal cell adhesion molecule [OS=Homo sapiens]	0	1970.01	0.61	1.228	0.342	0.665	0.829	155.4	91.3	110.5	37.8	159.4	45.6	149.4	129.4	114.1	111	69.6	76	163.6	85.4	92	83.6	20.2	31.5	298.1	132.7	128.4	40.1	38	37	27820.7	24097.3	21252.7	20664.1	12960.1	14150.1	30461.7	15913	17130.3	15570.8	3764.54
[K].VLVGKNFEDVAFDEK.[K]	1xBiotin [K5]	1	1	P07237	P07237 [371-385]	P07237 1xBiotin [K375]	Protein disulfide-isomerase [OS=Homo sapiens]	1	1935.95	0.85	0.826	0.985	0.761	0.828	102.3	110.4	91.2	89.9	119.9	86.3	102.7	80.7	140.6	67.6	110.8	119.5	91.5	91.7	88.1	66	115.1	90.2	120.2	138.4	66	85.1	139.1	86.5	2947.16	2316.95	4037.99	1940.53	3180.46	3431.25	2627.42	2631.32	2529.69	1896.17	3305.48
[R].KAGNFYVPAEPK.[L]	1xBiotin [K1]	1	3	P18124	P18124 [77-88]	P18124 1xBiotin [K77]	60S ribosomal protein L7 [OS=Homo sapiens]	1	1546.77	1.875	1.059	0.47	1.166	0.825	67.8	127.2	145.2	58.7	124.5	76.6	58.6	95.1	64.8	121.5	118.1	135.5	114.2	138.7	143.5	97.8	56.1	53.7	53.5	180.4	118.9	73.1	111.4	65.1	1892.18	3070.96	2092.01	3922.34	3812.04	4376.32	3688.63	4478.7	4634.18	3157.43	1811.24
[R].KQEIVAEK.[E]	1xBiotin [K1]	3	1	Q9ULV4	Q9ULV4 [205-212]	Q9ULV4 1xBiotin [K205]	coronin-1C [OS=Homo sapiens]	1	1170.62	1.648	0.733	0.785	1.217	0.822	74.5	137.6	128.6	77.2	88.2	93.9	126.8	63.8	71.1	105.1	131.4	193.7	61.5	122.8	141.9	53.7	73.7	111.5	84.2	57.8	116.6	89.7	84.6	109.9	4142.49	2084	2323.6	3433.42	4292.25	6325.19	2008.54	4012.02	4635.51	1755.29	2407.5
[R].GALQNIIPASTGAAKAVGK.[V]	1xBiotin [K15]	2	4	P04406-1	P04406-1 [201-219]	P04406-1 1xBiotin [K215]	glyceraldehyde-3-phosphate dehydrogenase [OS=Homo sapiens]	1	1993.09	1.422	0.865	0.597	0.875	0.822	98.7	105.2	125	37.4	142.2	91.4	15.9	114.6	110.9	73.4	118.3	163.1	55.9	141.1	140.5	33.3	108.9	42	99.4	159.9	161.3	26.1	102.8	132.5	2451.08	17656.4	17084.9	11311.5	18219.3	25112.6	8603.24	21724.8	21640.9	5134.12	16772.6
[R].IVAPGKGILAADESTGSIAK.[R]	1xBiotin [K6]	2	51	P04075	P04075 [23-42]	P04075 1xBiotin [K28]	fructose-bisphosphate aldolase A [OS=Homo sapiens]	1	2124.14	0.913	1.025	1.018	0.792	0.817	101	92.2	94.5	89.4	119.3	103.5	75.5	101.3	123.9	70.4	92.5	107.7	78.9	99.5	94.8	80.3	108.2	89.7	119.7	130	92.9	98.2	132.7	103.8	70958.6	95186.1	116424	66146.2	86878.9	101189	74091	93458.7	89059.3	75402.6	101638
[QK].SAVGFEYQGKTEK.[H]	1xBiotin [K10]	3	4	Q14247-1	Q14247-1 [135-147]; [209-221]	Q14247-1 1xBiotin [K144]; 1xBiotin [K218]	Src substrate cortactin [OS=Homo sapiens]	1	1669.79	0.889	0.996	0.898	0.561	0.817	95.9	85.3	84.7	76	165	93	94.6	101.5	82.1	69.8	92	84.1	91.6	83.5	80.5	85	75	70.9	162.6	163.2	123	47	201.8	91.7	3664.2	3932.54	3181.61	2704.41	3563.31	3258.64	3549.7	3233.62	3117.16	3293.93	2904.18
[R].KYAYSAASGGR.[R]	1xBiotin [K1]	1	7	P17301	P17301 [261-271]	P17301 1xBiotin [K261]	Integrin alpha-2 [OS=Homo sapiens]	1	1356.64	0.641	1.068	0.39	0.843	0.812	142.2	111.3	113.2	44.2	134.9	54.4	206.1	136.3	117.3	114.6	75.2	106.7	152.2	80.3	108.5	58.7	42.3	35.6	169.5	129.3	95.2	69.1	52.2	50.9	56354.8	37276.6	32091.2	31353.6	20556.9	29176.2	41623.5	21950.2	29671.8	16063.6	11578.5
[KR].VTIAQGGVLPNIQAVLLPKK.[T]	1xBiotin [K19]	10	2	Q16777	Q16777 [101-120]	Q16777 1xBiotin [K119]	Histone H2A type 2-C [OS=Homo sapiens]	1	2285.34	1.101	0.905	0.842	1.046	0.812	108.4	106.3	96.2	81	108.3	99.8	117.8	62.2	111.7	109.5	104.6	129.7	82.3	119.4	99.1	83.4	89.9	79.9	78.7	111.6	114	102.8	81.7	121.9	3963.73	2091.51	3759.02	3685.04	3519.62	4364.45	2767.79	4016.9	3334.68	2807.11	3024.96
[K].MTVVKLISHR.[E]	1xBiotin [K5]	2	3	P00749	P00749 [334-343]	P00749 1xBiotin [K338]	Urokinase-type plasminogen activator [OS=Homo sapiens]	1	1409.78	0.934	1.144	0.626	1.346	0.809	95.8	89.5	149.7	93.7	72.8	98.6	86	100.5	102.8	60.9	93.9	140.1	58	160.3	157.2	62	99.9	98.4	119.1	67.9	76.4	136.4	76.6	103.5	2590.39	3029.16	3098.4	1833.43	2830.61	4220.68	1746.92	4830.21	4736.32	1868.44	3009.63
[K].VVGAKVVTNAR.[S]	1xBiotin [K5]	5	10	Q15424-1	Q15424-1 [432-442]	Q15424-1 1xBiotin [K436]	Scaffold attachment factor B1 [OS=Homo sapiens]	1	1339.75	1.172	1.02	1.029	0.7	0.808	89.7	84.9	86.6	96.1	123.7	118.9	19.2	94.8	99.3	82.4	89.7	116.4	101.1	91.5	87.3	104	75.3	101.6	80.7	163.3	130.8	90.6	125.7	146.2	2316.46	11448.9	11984.3	9948.74	10833.4	14045.9	12199.5	11051.1	10540.4	12557.4	9094.68
[R].SGKPAELLKMFGIDR.[D]	1xBiotin [K9]	2	5	P29401	P29401 [595-609]	P29401 1xBiotin [K603]	Transketolase [OS=Homo sapiens]	1	1887.98	2.884	1.198	0.449	1.51	0.808	55.2	205.2	114.7	51.6	52.9	120.4	53.6	50.5	74	41.1	199.5	213.4	49.2	270.4	111.5	50.1	95.6	41.3	33.9	51.4	179	50	118.3	117	3823.61	3599.86	5274	2927.74	14221.5	15209.7	3507.64	19273.5	7950.86	3573.25	6816.81
[R].EMLQQSKILK.[VY]	1xBiotin [K7]	4	5	P07900; P08238	P07900 [401-410]; P08238 [393-402]	P07900 1xBiotin [K407]; P08238 1xBiotin [K399]	Heat shock protein HSP 90-alpha [OS=Homo sapiens] Heat shock protein HSP 90-beta [OS=Homo sapiens]	1	1443.77	1.809	0.99	0.437	0.857	0.804	73.1	132.3	135.9	59.4	125.4	73.9	73.1	68.6	73.8	91.6	171.6	132.3	68.4	169.8	135.9	59.4	73.4	48	125.4	204.3	79.8	73.9	87.6	63	3235.37	3036.98	3268.16	4055.4	7592.64	5854.32	3027.25	7513.97	6013.77	2630.06	3249.83
[K].QISGFGKK.[F]	1xBiotin [K7]	16	6	P15529-1	P15529-1 [238-245]	P15529-1 1xBiotin [K244]	Membrane cofactor protein [OS=Homo sapiens]	1	1090.57	0.62	1.273	0.345	0.797	0.802	148.6	92.2	117.4	44.6	147.3	49.9	176	148.4	123.6	97.8	92.1	90.1	135.1	109.2	117.2	46.6	35.4	44.5	171.3	147	100.9	71.1	49.8	44.1	79369	66930.7	55736.4	44105	41530.1	40644.3	60927.9	49234.4	52862.4	21029.1	15962.2
[R].TADGIVSHLKK.[Q]	1xBiotin [K10]	1	1	P30101	P30101 [120-130]	P30101 1xBiotin [K129]	Protein disulfide-isomerase A3 [OS=Homo sapiens]	1	1394.75	1.419	1.016	0.496	1.84	0.8	112.8	131.9	134	66.4	71.8	83	36.8	116.2	121.3	67.2	135.8	172.1	127.5	138	170.1	47.9	68.4	85	69.3	115.8	73.9	85.5	83.7	85.4	1745.62	5510.12	5755.48	3189.15	6441.6	8165.65	6046.25	6545.63	8070.8	2271.25	3243.72
[R].VDVAVNCAGIAVASKTYNLK.[K]	1xBiotin [K]; 1xCarbamidomethyl [C7]	2	3	Q99714-1	Q99714-1 [85-104]	Q99714-1 1xBiotin [K]	3-hydroxyacyl-CoA dehydrogenase type-2 [OS=Homo sapiens]	1	2319.18	0.85	1.181	0.62	1.064	0.799	121.1	96.6	119.2	68.2	112	83	87.5	110.8	124.4	82.6	88.4	105.8	109	91.4	124.9	56.7	62.4	91.9	69.2	102.5	227.6	76	115	74	3152.55	3991.07	4483.93	2976.19	3184.54	3812.96	3928.4	3294.52	4501.67	2043.53	2247.82
[R].LVKSQLQGLSASAGLLEQMR.[H]	1xBiotin [K3]; 1xOxidation [M19]	4	12	Q16787-1	Q16787-1 [233-252]	Q16787-1 1xBiotin [K235]	Isoform 1 of Laminin subunit alpha-3 [OS=Homo sapiens]	1	2371.25	1.346	0.844	0.326	1.168	0.792	105.6	142.1	128.6	35.2	110.1	78.4	106.2	131.9	89.9	207.1	142.9	113.7	96	138.8	129.3	31.3	71.9	35.4	16	110.7	190.8	90.8	18.6	78.8	12473.5	15489.6	10556.7	24326.9	16785.2	13358.3	11275.6	16304.1	15190.2	3673.13	8448.34
[K].AENGKLVINGNPITIFQER.[D]	1xBiotin [K5]	2	1	P04406-1	P04406-1 [62-80]	P04406-1 1xBiotin [K66]	glyceraldehyde-3-phosphate dehydrogenase [OS=Homo sapiens]	1	2339.22	1.326	0.779	1.232	1.051	0.784	78.8	115	89.5	86.4	76.4	154	56.2	79.5	133.1	74.6	140	115.9	103.9	90.2	63.9	84.4	128	87.1	60.8	77	104	83.1	155.3	163.2	2242.61	3168.45	5306.13	2974.37	5581.43	4621.97	4141.96	3598.28	2548.87	3366.38	5103.34
[K].WTLLQEQGTKTVR.[Q]	1xBiotin [K10]	4	7	P04259; P02538; P13647	P04259 [195-207]; P02538 [195-207]; P13647 [200-212]	P04259 1xBiotin [K204]; P02538 1xBiotin [K204]; P13647 1xBiotin [K209]	keratin, type II cytoskeletal 6B [OS=Homo sapiens] Keratin, type II cytoskeletal 6A [OS=Homo sapiens] keratin, type II cytoskeletal 5 [OS=Homo sapiens]	1	1785.93	1.883	1.111	0.371	1.691	0.783	74.4	153.5	152.7	56.7	90.3	72.3	50.3	70.9	99.9	94.8	146.2	174.9	145.5	194.4	136.9	54	78.6	47.1	142.8	86	67.4	65.3	68.9	76.2	2643.94	3725.04	5249.78	4979.41	7683.86	9191.9	7645.44	10214.8	7193.02	2836.23	4130.15
[K].VIPELNGKLTGMAFR.[V]	1xBiotin [K8]; 1xOxidation [M12]	2	32	P04406-1	P04406-1 [220-234]	P04406-1 1xBiotin [K227]	glyceraldehyde-3-phosphate dehydrogenase [OS=Homo sapiens]	1	1887.98	0.623	1.166	1.393	0.725	0.783	111.3	69.3	80.9	103.6	102.6	132.3	121.2	113	98.7	79	70.4	57.9	67.8	82.1	82.8	94.4	105.2	123.7	94.9	114.1	104.3	134.4	120.8	135.3	45654.5	42572.8	37169.5	29749.4	26530.8	21827.5	25533	30941.6	31179.5	35555.3	39643.7
[K].EIKAIASIPTER.[Y]	1xBiotin [K3]	1	12	P17301	P17301 [328-339]	P17301 1xBiotin [K330]	Integrin alpha-2 [OS=Homo sapiens]	1	1553.84	0.608	1.438	0.302	0.754	0.782	141	85.7	123.3	37.9	163.5	48.5	157.9	133.3	144.9	88.1	109	80.9	129.1	126.7	119.5	39	39	24.3	168.1	178.7	114	22	75.6	49.8	14299.1	12076.7	13125.3	7979	9874.4	7329.24	11692.6	11475.8	10824.3	3535.4	3530.63
[R].TSDKGQFFR.[V]	1xBiotin [K4]	1	13	P33151	P33151 [412-420]	P33151 1xBiotin [K415]	Cadherin-5 [OS=Homo sapiens]	1	1311.62	0.55	1.391	0.287	0.996	0.781	159.3	96.1	129.7	37.2	130.1	47.6	183.1	159.6	141.5	67.6	96.2	100.7	140.1	129.5	129.9	43	37.2	23.1	165.1	130.4	105.9	54.7	44.7	47.7	29774.4	25944.3	23007.9	10984.1	15647.9	16371.1	22779.9	21058.3	21118.6	6997.4	6054.39
[-].MAAANKGNKPR.[V]	1xBiotin [K6]; 1xMet-loss+Acetyl [N-Term]	1	9	Q9GZN8	Q9GZN8 [1-11]	Q9GZN8 1xBiotin [K6]; 1xMet-loss+Acetyl [N-Term]	UPF0687 protein C20orf27 [OS=Homo sapiens]	1	1294.67	0.914	0.911	1.004	0.428	0.78	86.4	78	71.1	94.4	166	104.1	28.1	109.3	87.8	79.2	75.4	99.9	96.9	60.4	72.2	95.8	97.3	57.2	168.6	119.2	236.7	105.7	124.8	85.5	2617.36	10161.6	8162.77	7367.65	7015.23	9288.21	9016.28	5621.83	6711.52	8912.34	9048.57
[K].IGHPAPNFKATAVMPDGQFK.[D]	1xBiotin [K9]	1	2	Q06830	Q06830 [8-27]	Q06830 1xBiotin [K16]	peroxiredoxin-1 [OS=Homo sapiens]	1	2352.16	1.135	0.911	1.235	0.54	0.779	112.2	127.3	58.3	78.6	115.2	108.4	108.8	105.8	94.1	60.1	120.1	177.3	54.7	169.1	55	86	74.1	67.6	108.7	130.5	101.3	102.3	110.5	74	3798.23	3693.13	3284.5	2096.42	4191.92	6188.8	1909.12	5899.94	1919.08	3002.31	2587.42
[K].HSSQTSNLAHKTYSLSSSFSSSSSTR.[K]	1xBiotin [K11]	1	1	O60563	O60563 [547-572]	O60563 1xBiotin [K557]	Cyclin-T1 [OS=Homo sapiens]	1	3000.38	1.639	0.65	1.113	0.98	0.777	81	132.7	86.3	96.1	79.8	124	74.8	66.2	71.6	117.4	122.8	106.9	108	63.1	76.3	69.3	85	129.7	64.4	70.6	234.5	89.2	140.8	109.6	2180.59	1928.45	2087.15	3420.4	3577.82	3114.63	3147.64	1839.14	2224.63	2019.89	2476.15
[K].VGEFSGANKEK.[L]	1xBiotin [K9]	2	4	P10599-1	P10599-1 [86-96]	P10599-1 1xBiotin [K94]	thioredoxin [OS=Homo sapiens]	1	1391.66	2.449	0.658	0.694	1.584	0.777	71	173.9	114.5	77.9	55.7	107	85	70.4	59	95.9	172.5	219.2	62.3	113.6	156	108.3	77.2	72.5	98.5	55.2	46.1	93.3	106.2	108.9	3176.5	2630.93	2203.09	3581.76	6443.49	8186.8	2326.73	4242.57	5827.14	4045.28	2885.05
[R].GLDSKASLILR.[S]	1xBiotin [K5]	8	13	P23229-1	P23229-1 [982-992]	P23229-1 1xBiotin [K986]	integrin alpha-6 [OS=Homo sapiens]	1	1398.78	0.687	1.14	0.394	0.871	0.773	142.7	101.1	115.3	53	132.4	55.4	137.8	186.2	125.6	102.2	86.3	97.6	145.6	111.3	97.8	51.6	38.6	51.2	146.6	120.4	127.8	66.8	53.5	53.1	27636.1	37349.7	25201.6	20499	17303.7	19584.7	29201.3	22329.2	19621.5	10360.1	7739.51
[R].SLGLQLAKVR.[S]	1xBiotin [K8]	2	2	Q13753-1	Q13753-1 [676-685]	Q13753-1 1xBiotin [K683]	Laminin subunit gamma-2 [OS=Homo sapiens]	1	1310.76	0.934	1.164	0.913	1.11	0.772	117.1	101.1	123.5	73.3	90	95	111.9	127.3	84.1	95.9	96.6	118.9	58.4	118	138.4	70.1	126.3	63.7	84.1	86	124.7	90.8	119.6	85.2	3523.11	4010.43	2648.07	3020	3043.15	3743.98	1840.17	3716.33	4358.81	2206.43	3978.31
[K].KVTHAVVTVPAYFNDAQR.[Q]	1xBiotin [K1]	1	2	P11021	P11021 [164-181]	P11021 1xBiotin [K164]	78 kDa glucose-regulated protein [OS=Homo sapiens]	1	2242.14	1.911	0.792	0.829	1.106	0.768	75.4	144	98	81.2	92.5	108.9	77.2	69.5	88.3	71.7	147.4	191.2	77	151.4	100.4	83.2	86.9	77.8	94.8	97.5	69.6	91.7	113	111.5	2840.5	2560.38	3249.17	2639.54	5427.21	7038.66	2833.95	5573.76	3695.06	3062.81	3198.11
[R].KALHEGVGSGSGSPDGAVVQGLVEK.[L]	1xBiotin [K1]	2	3	Q13753-1	Q13753-1 [795-819]	Q13753-1 1xBiotin [K795]	Laminin subunit gamma-2 [OS=Homo sapiens]	1	2604.31	1.019	1.191	0.416	0.799	0.765	51.5	116.3	140.3	56.8	160.8	74.3	56.4	56.9	181.7	57.5	128.5	130.7	39	155.6	155	64.8	49.4	62.8	48.9	177.6	195.8	31.4	82.1	125.8	3631.4	3666.88	11705	3700.03	8274.26	8418.4	2514.24	10022.9	9981.51	4171.6	3180.47
[RK].VGDKIATR.[K]	1xBiotin [K4]	5	7	P29401	P29401 [311-318]	P29401 1xBiotin [K314]	Transketolase [OS=Homo sapiens]	1	1085.58	0.628	0.969	1.02	0.499	0.763	122.8	77.1	74.7	76.1	149.5	99.8	105.2	120.7	143	73.2	75.8	85.1	75.5	71.1	73.4	74.9	71.8	102.2	147	179.6	101.8	98.1	96.2	105.3	40059.4	45954.9	54426.4	27873.5	28850.9	32397.1	28755.1	27044.9	27945.4	28496.7	27320.2
[K].KHVNPVQALSEFK.[A]	1xBiotin [K1]	3	1	P35221	P35221 [889-901]	P35221 1xBiotin [K889]	Catenin alpha-1 [OS=Homo sapiens]	1	1722.9	0.855	1.059	0.787	0.687	0.758	100.2	92.6	104.9	81.1	106.3	114.9	142.1	99.1	103.1	84.8	95.3	110.5	30.5	117.1	107.9	82.5	92.1	83.4	104.9	170.3	109.4	27.3	118.3	121.5	10635.7	7423.04	7722.4	6345.61	7131.84	8273.5	2282.93	8764.94	8078.76	6174.88	6893.92
[R].AGEKGVAYTLLTPK.[D]	1xBiotin [K4]	2	9	Q86XP3-1	Q86XP3-1 [592-605]	Q86XP3-1 1xBiotin [K595]	ATP-dependent RNA helicase DDX42 [OS=Homo sapiens]	1	1673.89	1.223	1.062	1.074	0.526	0.752	95.7	74.8	79.5	85.4	151	113.6	19.2	100.3	103.1	55.9	78.4	126	63.8	83.3	99.2	91.4	81.7	89.5	171.1	158.3	145.8	86.8	127.3	119.1	2010.49	10524.5	10816.5	5866.03	8229.15	13224.2	6694.66	8742.82	10407.6	9594.31	8570.98
[K].TLNNKFASFIDK.[V]	1xBiotin [K5]	13	14	P35908; P04259; P02538; P05787; P13647	P35908 [184-195]; P04259 [169-180]; P02538 [169-180]; P05787 [97-108]; P13647 [174-185]	P35908 1xBiotin [K188]; P04259 1xBiotin [K173]; P02538 1xBiotin [K173]; P05787 1xBiotin [K101]; P13647 1xBiotin [K178]	Keratin, type II cytoskeletal 2 epidermal [OS=Homo sapiens] keratin, type II cytoskeletal 6B [OS=Homo sapiens] Keratin, type II cytoskeletal 6A [OS=Homo sapiens] Keratin, type II cytoskeletal 8 [OS=Homo sapiens] keratin, type II cytoskeletal 5 [OS=Homo sapiens]	1	1623.82	1.952	0.789	0.258	1.506	0.747	81.1	184.3	145.4	35.1	96.5	57.6	76.5	75.7	115.3	147.7	178.9	173.9	84.9	196.1	137.2	21.9	96.5	33.1	122.4	91.1	80.4	29.3	54.4	84.8	8633.55	8539.13	13010.4	16668.1	20192.1	19628.6	9582.58	22126.6	15478.9	2468.53	10889.1
[K].IVEIPFNSTNKYQLSIHK.[N]	1xBiotin [K11]	4	5	P05023	P05023 [477-494]	P05023 1xBiotin [K487]	Sodium/potassium-transporting ATPase subunit alpha-1 [OS=Homo sapiens]	1	2357.23	1.687	0.855	0.599	0.693	0.743	67.3	113.5	92.2	55.2	197.7	74.2	35.3	63.7	162	69	107.5	136.8	59	175.5	87.3	78.9	52.3	44.8	73.6	187.2	253.3	65.7	77.7	70.3	1865.49	3366.79	8560.59	3647.32	5679.1	7227.88	3119.3	9271.68	4613	4166.18	2761.04
[K].VDKGVVPLAGTNGETTTQGLDGLSER.[C]	1xBiotin [K3]	2	6	P04075	P04075 [109-134]	P04075 1xBiotin [K111]	fructose-bisphosphate aldolase A [OS=Homo sapiens]	1	2840.41	0.889	0.827	0.814	1.311	0.737	135.2	107.1	102.5	89.6	44.2	121.5	56.9	168	147.8	79.7	117.1	149.3	50.5	112.1	123.5	99.7	98	41.2	48.3	38.6	145	56.6	132.9	134.9	3735.72	11033.3	9708.92	5238.29	7692.82	9808.95	3319.55	7362.75	8108.96	6549.12	6434.06
[R].SAGKTSLVEEAEK.[H]	1xBiotin [K4]	4	7	Q16787-1	Q16787-1 [523-535]	Q16787-1 1xBiotin [K526]	Isoform 1 of Laminin subunit alpha-3 [OS=Homo sapiens]	1	1574.77	1.368	1.638	0.405	1.269	0.731	77.2	95	155.7	63.1	122.7	86.4	39.9	84.2	81.9	67.8	100.8	115.2	163.1	165.2	166.8	92.9	67	23.8	174.3	106.4	130.2	36.1	92.7	91.7	3337.43	7034.56	6844.24	5666.79	8428.31	9625.35	13636	13808.4	13944.1	7761.68	5598.81
[K].KPKNENPVDYTVQIPPSTTYAITPMK.[R]	1xBiotin [K]; 1xOxidation [M25]	7	21	Q12906-1	Q12906-1 [346-371]	Q12906-1 1xBiotin [K]	Interleukin enhancer-binding factor 3 [OS=Homo sapiens]	1	3174.58	1.58	0.967	0.889	0.825	0.728	72.9	115.2	111.4	72.1	87.3	141	7.6	78.1	129.4	86.6	123.4	126.4	23.5	130.5	119.3	74.8	116	77.3	47.3	93.6	158.3	97.3	151.1	159.5	2099.7	21712.3	35978.8	24073.4	34308.8	35145.4	6534.72	36282.2	33173.5	20803.2	32255.8
[K].AGDSLMVMIAMKMEHTIK.[S]	1xBiotin [K]; 2xOxidation [M]	1	91	Q96RQ3	Q96RQ3 [670-687]	Q96RQ3 1xBiotin [K]	Methylcrotonoyl-CoA carboxylase subunit alpha, mitochondrial [OS=Homo sapiens]	1	2264.06	0.401	0.949	0.946	0.578	0.722	189	75.7	71.8	66.6	120.3	76.4	217.7	112.1	178.9	162.1	71.7	44.2	42.7	74.7	68	70.7	63	48.2	113.9	99.9	129.1	164.1	72.3	66.8	349203	179738	286935	259945	114949	70904.8	68513.1	119814	109044	113393	101131
[K].GKGFSVVADTPELQR.[I]	1xBiotin [K2]	3	6	Q14847	Q14847 [95-109]	Q14847 1xBiotin [K96]	LIM and SH3 domain protein 1 [OS=Homo sapiens]	1	1829.92	0.638	1.06	1.173	0.786	0.721	111	76.8	81.4	95.5	102.9	132.4	132.3	116.3	117.2	29.4	84.4	81	59.8	85.9	89.4	69	100.8	136.2	76	108.6	117.3	111	145.6	139.8	20084.8	17652.6	17792.8	4458.71	12814.3	12299.9	9075.19	13042.2	13570.9	10477.5	15298.2
[K].LLSKTPELNLDQFHDK.[T]	1xBiotin [K4]	3	4	P27824	P27824 [167-182]	P27824 1xBiotin [K170]	Calnexin [OS=Homo sapiens]	1	2124.08	1.517	1.11	0.418	1.107	0.72	82.5	125.1	138.9	58.1	125.5	70	37.8	87	139.7	96.3	162.5	132	59.1	212.5	146.6	61.3	39.5	62.8	58.5	132.4	141.7	87.2	69.3	73.8	1738.89	4006.73	6433.14	4431.87	7479.41	6079.03	2721.31	9784.43	6747.76	2823.33	1817.19
[R].HKMTTLTPAYHAENYSPEDNR.[F]	1xBiotin [K2]	2	9	Q6IA69	Q6IA69 [648-668]	Q6IA69 1xBiotin [K649]	glutamine-dependent NAD(+) synthetase [OS=Homo sapiens]	1	2701.21	0.594	1.293	0.669	0.393	0.714	106.4	111	67.2	60.2	171	84.3	66.4	86.9	189.9	32.2	90.7	112.8	48.6	146	55	32.5	77	49.2	124.5	273	139.8	40.5	166	68.9	3530.08	4622.36	10098	1711.72	4822.82	5999.77	2584.38	7759.84	2922.61	1729.86	4095.73
[R].AAFVSEQQQKLSR.[L]	1xBiotin [K10]	2	36	P26006	P26006 [629-641]	P26006 1xBiotin [K638]	Integrin alpha-3 [OS=Homo sapiens]	1	1717.87	0.69	1.266	0.289	0.867	0.713	148.8	101.7	122.8	35.5	141.5	49.7	163.4	126.4	142	88.2	97	112.8	142.9	114.4	117.1	33.8	28.8	58	181.6	135	108.4	58.5	47.5	44.3	104697	80969.8	90978.1	56512.9	62143.8	72289.9	91531.6	73328	75037.6	21685.1	18454.9
[R].NALLSLAKGDR.[S]	1xBiotin [K8]	1	2	P04083	P04083 [178-188]	P04083 1xBiotin [K185]	annexin A1 [OS=Homo sapiens]	1	1383.74	1.129	0.948	0.792	1.022	0.709	96.8	109.3	103.6	82.1	92.4	115.8	69.2	120.1	95.4	74.2	107.7	138.9	89.6	110.3	102.1	76.3	84.9	80.9	91	87.7	121.8	107.4	128.3	114	2216.23	3843.75	3052.22	2374.06	3446.1	4446.59	2868.82	3531.28	3268.09	2443.44	2718.36
[R].KAQTLNNNVNR.[A]	1xBiotin [K1]	4	1	Q16787-1	Q16787-1 [306-316]	Q16787-1 1xBiotin [K306]	Isoform 1 of Laminin subunit alpha-3 [OS=Homo sapiens]	1	1497.76	1.593	1.092	0.343	2.479	0.708	93.9	146.7	157.9	51.7	63.7	86.2	103.5	99.9	53.7	156.1	90.2	164.9	180	138.2	168	82	55.1	47.3	76	51.4	67.7	107.4	66.9	91.7	3939.5	3802.21	2044.04	5939.6	3434.87	6274.9	6850.97	5259.43	6393.06	3122.85	2095.73
[K].AFGQAKHQPTAIIAK.[T]	1xBiotin [K6]	2	6	P29401	P29401 [227-241]	P29401 1xBiotin [K232]	Transketolase [OS=Homo sapiens]	1	1806.97	0.616	1.119	0.751	0.497	0.699	125.7	77.5	86.7	65.1	151.7	93.2	112.5	127.5	127.3	61.3	78.4	99.8	89.7	71.9	87.8	51	70.1	66	153.6	180.3	147.1	84.5	94.4	96.9	28921	32780.8	32724.3	15751.9	20165.3	25662.7	23052.4	18472.3	22567.2	13103.1	18007.3
[K].VEKVTISNR.[L]	1xBiotin [K3]	2	1	P08238	P08238 [575-583]	P08238 1xBiotin [K577]	Heat shock protein HSP 90-beta [OS=Homo sapiens]	1	1271.68	0.84	0.727	1.115	1.074	0.698	132	110.8	76.5	85.3	73.2	122.2	133.5	128	148.3	131	99.1	112.1	77.3	97.8	72.1	110.3	47.1	86.2	74	46.3	91.1	123.6	126.9	95.6	12970.2	12435.8	14409.2	12725.7	9631.05	10890.1	7511.83	9506.73	7004.98	10716.8	4575.14
[R].KISSPTGSK.[D]	1xBiotin [K1]	2	4	Q99623	Q99623 [89-97]	Q99623 1xBiotin [K89]	Prohibitin-2 [OS=Homo sapiens]	1	1130.59	0.786	1.557	0.316	1.122	0.695	121.5	95.5	135.7	42.8	136.1	68.5	102.4	120.7	117.9	92.7	74.9	110.3	194.8	116.6	131.7	56.9	37.4	41.6	171.6	132.1	103.9	74.3	66.5	53.8	11577.6	13649.1	13328.7	10476.9	8462.01	12469.7	22025.1	13176.4	14888.8	6434.93	4225.78
[K].SLLGKDVLFLK.[D]	1xBiotin [K5]	3	3	P00558	P00558 [87-97]	P00558 1xBiotin [K91]	phosphoglycerate kinase 1 [OS=Homo sapiens]	1	1458.84	1.779	0.621	0.713	0.865	0.694	74.1	152.6	94.6	67.1	109.3	102.3	58.7	70.7	123.4	104.4	153.3	145.6	90.2	95.1	89	64	121.1	63.4	82.2	124.2	104.3	91.3	121.5	97.6	1947.67	2344.35	4092.34	3464.14	5083.55	4829.19	2992.92	3155.44	2952.76	2122.68	4016.39
[K].KILATPPQEDAPSVDIANIR.[M]	1xBiotin [K1]	2	11	P29401	P29401 [283-302]	P29401 1xBiotin [K283]	Transketolase [OS=Homo sapiens]	1	2374.24	0.774	1.084	0.468	0.694	0.694	116.1	89.8	97.4	45.6	137.7	113.5	17.8	121	182.2	74	93.7	105.3	71.7	122.6	101.5	31.1	102.9	47.5	103.3	143.5	192.6	22.6	148.2	118.4	2299.34	15603	23488.6	9541.9	12078.3	13576.6	9250.37	15810.3	13093.3	4007.36	13266.5
[R].IGAEVYHNLKNVIK.[E]	1xBiotin [K10]	2	2	P06733-1	P06733-1 [184-197]	P06733-1 1xBiotin [K193]	alpha-enolase [OS=Homo sapiens]	1	1823.98	1.159	0.583	0.973	0.753	0.694	104.8	121.4	70.2	58.3	123.8	121.6	115.9	109.4	75.5	129	101.7	126.8	59.3	73.3	102.5	57.7	106.5	60.9	136.1	129.3	69.4	83.1	127	136.7	3465.77	3272.06	2258.37	3858.31	3041.71	3791.72	1771.92	2191.37	3063.72	1724.83	3184.03
[R].NLLSVAYKNVVGAR.[R]	1xBiotin [K8]	5	8	P63104-1	P63104-1 [42-55]	P63104-1 1xBiotin [K49]	14-3-3 protein zeta/delta [OS=Homo sapiens]	1	1729.94	1.413	0.66	0.298	0.824	0.692	117.5	166	109.5	32.6	132.9	41.4	22.5	129	196.1	70.8	182.2	187.3	21.4	183.1	120.2	24.6	47.3	35.8	79.3	145.9	179.4	35.6	45.4	94.2	2521.22	14442.2	21959.7	7925.64	20400.8	20971.5	2394.57	20495.2	13458.6	2758.63	5297.24
[K].GKEYFAIDNSGR.[I]	1xBiotin [K2]	2	3	P33151	P33151 [196-207]	P33151 1xBiotin [K197]	Cadherin-5 [OS=Homo sapiens]	1	1582.73	1.223	1.136	0.641	1.344	0.69	98.4	118.5	112.2	75.7	85.4	109.7	99.3	106.7	65.6	89.4	119.6	130.5	113.2	148.3	103.2	66.2	86.3	76.4	110.3	68.8	86.1	110.7	114	105	3300.74	3547.16	2181.44	2969.9	3974.19	4337.2	3762.72	4928.91	3429.97	2198.95	2868.63
[K].LVSEAKAQLR.[D]	1xBiotin [K6]	1	9	P35052	P35052 [378-387]	P35052 1xBiotin [K383]	Glypican-1 [OS=Homo sapiens]	1	1340.74	0.796	0.976	0.335	0.638	0.69	126.7	93.3	114.7	37.4	179.8	48.1	63.1	163.9	130.4	92.7	96	130.4	118	127.3	83.6	38.5	42.7	34.1	191.9	185	137.7	49.5	49.5	65.9	4149.31	10772.5	8570.64	6093.08	6308.54	8573.22	7755.25	8369.45	5493.6	2532.58	2804.8
[R].KFGDPVVQSDMK.[H]	1xBiotin [K1]	2	4	P0DMV8	P0DMV8 [77-88]	P0DMV8 1xBiotin [K77]	heat shock 70 kDa protein 1A [OS=Homo sapiens]	1	1576.75	2.543	1.143	0.439	1.433	0.687	47	151.1	172.7	59.3	83.6	86.3	42.8	46	76.1	59.2	147.9	193.6	44.9	224	169.1	46.1	98.4	58	52.1	156.3	81.9	76.3	142.7	84.5	2237.17	2403.39	3974.91	3091.85	7724.68	10109.3	2345.64	11694.6	8827.82	2405.06	5136.74
[R].TALQKEITTR.[Y]	1xBiotin [K5]	1	5	P16422	P16422 [164-173]	P16422 1xBiotin [K168]	Epithelial cell adhesion molecule [OS=Homo sapiens]	1	1386.74	1.18	1.381	0.316	1.57	0.686	112.4	111.6	154.2	48.7	98.2	74.8	63.5	106.5	126	74.9	105.8	161	208.2	146.1	121.4	40.9	57.9	46.1	93.1	176.8	72	70.9	84.4	44.5	2821.16	4731.9	5600.9	3330.11	4701.27	7153	9252.85	6494.57	5394.25	1818.3	2572.28
[K].VFIYHGSANGINTKPTQVLK.[G]	1xBiotin [K]	8	10	P23229-1	P23229-1 [446-465]	P23229-1 1xBiotin [K]	integrin alpha-6 [OS=Homo sapiens]	0	2413.27	1.055	1.38	0.199	0.862	0.685	130.6	114.6	134.7	26.8	156.3	37	21.7	128.3	136.4	73.2	112.5	143.9	101.7	198.6	132.3	33.3	21.2	26.3	153.5	228.7	143.3	31	36.3	77.8	2159.25	12759.7	13568.7	7282.1	11194.7	14317.6	10112.5	19758.4	13159.2	3315.73	2113.14
[K].KTDPSGLSK.[T]	1xBiotin [K1]	3	9	Q13740-1	Q13740-1 [423-431]	Q13740-1 1xBiotin [K423]	CD166 antigen [OS=Homo sapiens]	1	1158.58	18.747	1.549	0.037	1.056	0.661	7.6	141.8	219.6	8	215.5	7.5	208.1	4.6	6.8	123	127.1	139	196.9	233.6	161.3	50.6	4.3	7.2	221.3	193.1	7.1	102.6	6.6	6.7	92573	2051.85	3016.88	54737.3	56557.4	61818	87581	103943	71759.7	22519.8	1930.47
[K].KSVQYDDVPEYK.[D]	1xBiotin [K1]	3	13	Q13740-1	Q13740-1 [76-87]	Q13740-1 1xBiotin [K76]	CD166 antigen [OS=Homo sapiens]	1	1696.79	0.793	1.286	0.189	0.741	0.66	126.1	100	127.7	24.3	172.3	49.6	127.2	127.1	129.2	77.8	110.9	100.9	185	100.1	128.8	18.5	34.9	24.5	190.5	173.8	145.9	22	50	52.9	13963.5	13944.5	14180.4	8542.08	12170.7	11074.8	20304.5	10984.2	14134	2025.71	3830.24
[K].NLCYANTINWKK.[L]	1xBiotin [K11]; 1xCarbamidomethyl [C3]	3	7	P00533-1	P00533-1 [468-479]	P00533-1 1xBiotin [K478]	epidermal growth factor receptor [OS=Homo sapiens]	1	1750.84	0.805	0.921	0.419	0.543	0.652	142.6	114.8	105.7	32.4	140.1	64.4	139.6	134.6	137.9	79.3	111	112.9	71.6	102.3	112.5	51.9	31.4	30	243.8	135.5	132	31.7	79.5	62.3	14808.8	14285.9	14637	8419.32	11781.3	11977	7601.74	10854.9	11938.7	5506.37	3330.67
[R].MVVPAALKVVR.[L]	1xBiotin [K8]	2	2	P40429	P40429 [118-128]	P40429 1xBiotin [K125]	60S ribosomal protein L13a [OS=Homo sapiens]	1	1408.82	1.008	1.236	0.89	1.023	0.651	90.6	73.4	107.3	95.5	102.1	131.3	93.7	70.5	93.5	75.7	71.1	107.8	110.8	110.8	87.9	104.4	98.6	47.7	85.9	160.2	105.4	80.1	160.4	135.5	3444.66	2594.61	3439.42	2785.75	2616.26	3963.81	4076.78	4074.48	3232.57	3838.56	3625.03
[R].KLNFQVELLLDK.[L]	1xBiotin [K1]	3	8	P06756	P06756 [520-531]	P06756 1xBiotin [K520]	Integrin alpha-V [OS=Homo sapiens]	1	1685.93	0.743	0.848	0.427	0.841	0.645	157.6	117.1	99.3	42.4	118	65.7	54.7	153.2	272.3	66.6	154.9	113.8	45.3	132.7	96.5	51.6	41.2	39.5	31.7	114.7	195	30.4	63.9	141.8	3109.78	8713.3	15488.3	3787.45	8811.54	6472.69	2573.75	7546.05	5488.37	2937.12	2344.63
[K].NKITITNDQNR.[L]	1xBiotin [K2]	1	2	P11021	P11021 [522-532]	P11021 1xBiotin [K523]	78 kDa glucose-regulated protein [OS=Homo sapiens]	1	1542.77	1.048	1.086	0.423	0.746	0.644	103.6	111.8	115.6	48.8	145.6	74.6	95.2	108.9	102.4	81.5	110.5	114.2	124	101.9	114.2	57.4	48.2	38	189.7	136.6	143.8	89.1	70.7	73.7	8887.26	10168.4	9552.9	7604.33	10314.2	10660	11576.6	9507.09	10657.1	5356.75	4503.03
[K].IKLYWSK.[V]	1xBiotin [K2]	4	6	Q6YHK3-1	Q6YHK3-1 [559-565]	Q6YHK3-1 1xBiotin [K560]	CD109 antigen [OS=Homo sapiens]	1	1163.63	0.681	1.097	0.271	0.735	0.639	153.2	104.3	114.4	28.7	150.9	48.6	48.9	162.2	205.5	62.8	110.4	115.1	123.8	121.1	110.7	39.4	30	30.4	150.6	171	159.8	51.5	61.7	45	3092.89	10266.1	13009.2	3971.88	6990.15	7284.53	7838.4	7665.46	7006.96	2495.08	1901.56
[K].GQPLCVLSAMKMETVVTSPMEGTVR.[K]	1xBiotin [K11]; 1xCarbamidomethyl [C5]; 2xOxidation [M12; M]	1	503	P11498	P11498 [1134-1158]	P11498 1xBiotin [K1144]	pyruvate carboxylase, mitochondrial [OS=Homo sapiens]	1	2979.41	0.472	0.878	1.182	0.649	0.626	167.8	79.2	73.4	70.5	96.6	112.5	83.3	166.8	207.6	97.9	78.7	54	39.6	86	72.9	48.3	101.7	70	60.9	96	180.2	147.1	111.9	97.1	1.92014e+06	3.84444e+06	4.78366e+06	2.25663e+06	1.81304e+06	1.24454e+06	912229	1.98176e+06	1.68074e+06	1.11391e+06	2.34293e+06
[K].GLVLGPIHKNQK.[D]	1xBiotin [K9]	4	5	P08195	P08195 [258-269]	P08195 1xBiotin [K266]	4F2 cell-surface antigen heavy chain [OS=Homo sapiens]	1	1529.86	0.82	1.334	0.353	0.932	0.624	127.3	104.4	114.9	40.5	147.9	65	28	168	139.8	33.5	121.7	114.6	162.3	126.2	109.2	44.5	58.6	38.4	174.2	162.4	95.4	85.8	66.3	71.3	2609.04	15672.2	13041.1	3128	11355.6	10690.6	15146.7	11774.2	10193.1	4151.03	5468.96
[K].KDVLETFTVK.[S]	1xBiotin [K1]	1	20	P21926	P21926 [170-179]	P21926 1xBiotin [K170]	CD9 antigen [OS=Homo sapiens]	1	1405.74	0.743	1.384	0.242	0.976	0.621	130.3	101	133.2	32.3	151.3	52	123.9	150.1	128	73.8	99.2	111.5	154.3	125.4	130.9	31.7	42	29.8	158.1	148.7	126	51.1	47.8	67.7	27855.8	33729.5	28778	16585.2	22299.6	25059	34671.6	28181.7	29418.2	7127.98	9428
[R].GFGGKFGVQMDR.[V]	1xBiotin [K5]; 1xOxidation [M10]	3	9	Q14247-1	Q14247-1 [120-131]	Q14247-1 1xBiotin [K124]	Src substrate cortactin [OS=Homo sapiens]	1	1540.7	0.423	1.038	1.152	0.391	0.62	147	59.6	61.9	67.7	158.5	105.3	150.2	136.5	113.6	63.6	55.3	52.2	82.1	45.3	57.4	94.6	59.7	62.9	187.4	147.1	124.9	173.4	97.7	96.2	42270.1	38407	31967.5	17901.1	15565.4	14686.9	23108.4	12752.6	16164	26612.5	16794.4
[K].AIHNKVNIVPVIAK.[A]	1xBiotin [K5]	3	10	Q15019	Q15019 [170-183]	Q15019 1xBiotin [K174]	septin-2 [OS=Homo sapiens]	1	1742.01	0.763	0.963	1.085	0.716	0.611	108	81.1	82.7	84.9	103.4	140.1	94.2	116.3	107.5	71.8	80.7	101.2	82.4	82.3	69.2	84.5	89.4	83.5	96.6	142.7	102.9	146.3	139.5	109	21347.4	26368	24361.2	16286.4	18292.9	22946.9	18683	18651.9	15689.8	19152.6	20270.4
[K].TEWLDGKHVVFGK.[V]	1xBiotin [K7]	2	14	P62937	P62937 [119-131]	P62937 1xBiotin [K125]	peptidyl-prolyl cis-trans isomerase A [OS=Homo sapiens]	1	1741.87	0.971	0.955	0.752	0.817	0.61	96.5	109.6	99.7	62.9	122	109.3	123.1	91.1	96.9	71.8	110.1	119.5	68.9	114.1	100.2	62.1	85.8	63.2	122.6	108	137.3	101.8	113.7	109.8	20029.8	14822.1	15772.6	11686.4	17921.3	19449	11214.4	18579.9	16303.9	10113.3	13963.2
[K].TKDEPQR.[E]	1xBiotin [K2]	1	12	P21926	P21926 [134-140]	P21926 1xBiotin [K135]	CD9 antigen [OS=Homo sapiens]	1	1099.52	0.677	1.268	0.313	0.904	0.602	142.9	96.7	122.6	38.4	135.6	63.8	150.2	128.4	139	94.1	76.5	110.8	119.3	124	115.5	46.4	34.9	37.3	171	131.9	120.5	83	62.1	55	50785.8	43429.6	47018.4	31819.6	25871.5	37482.8	40335.6	41928.6	39073.2	15680.9	11809.6
[K].LLQKGIHPTIISESFQK.[A]	1xBiotin [K4]	2	14	P50991	P50991 [123-139]	P50991 1xBiotin [K126]	T-complex protein 1 subunit delta [OS=Homo sapiens]	1	2165.18	0.909	0.797	0.927	0.558	0.601	104.2	94.7	74.1	69.5	132.9	124.6	84	108.5	127.9	78.3	98.6	107.4	62.4	99.4	77.2	57.9	72.3	78.1	147.9	138.3	121.1	81	129.9	129.7	18461.9	23842.1	28101	17205.4	21670.6	23607.6	13715.2	21844.9	16960.4	12718.6	15889
[K].NKTGAAPIIDVVR.[S]	1xBiotin [K2]	1	4	P46776	P46776 [93-105]	P46776 1xBiotin [K94]	60S ribosomal protein L27a [OS=Homo sapiens]	1	1579.86	0.931	1.278	0.622	0.818	0.598	86.7	87.8	121.3	57.7	148.3	98.2	92	87.6	120.2	102.3	93.2	81.5	70.6	130.7	128.8	61.3	95	43.9	48.6	157.5	161.9	61.7	104.3	158.9	3752.49	3572.13	4900.74	4168.72	3800.57	3323.92	2876.13	5327.19	5251.16	2498.34	3872.61
[K].AATALKDVVK.[V]	1xBiotin [K6]	5	13	Q15084-1	Q15084-1 [68-77]	Q15084-1 1xBiotin [K73]	Protein disulfide-isomerase A6 [OS=Homo sapiens]	1	1241.69	0.525	1.158	0.96	0.619	0.591	132.3	69.5	71.4	68.6	134.1	124.1	142.4	131.6	116.3	58.4	74.8	69.2	102.1	71.1	67.7	68	68.2	79	133.5	165	85.2	115	128.7	123.6	18161.2	16788.6	14835.8	7452.96	9540.23	8820.2	13021.6	9066.45	8627.65	8675.53	8702.6
[K].KGVNLPGAAVDLPAVSEK.[D]	1xBiotin [K1]	3	9	P14618	P14618 [207-224]	P14618 1xBiotin [K207]	Pyruvate kinase PKM [OS=Homo sapiens]	1	1991.06	0.931	1.989	0.533	0.549	0.591	55.9	52.1	103.6	55.2	188.6	144.5	52.7	50.7	87.6	49.1	175.3	42.1	87.6	97.7	98	52	198	42.5	177.8	180.3	60.9	71.8	136.2	139.7	2151.55	2069.19	3574.55	2003.62	7155.04	1716.59	3573.3	3985.34	4000.99	2123.73	8078.51
[K].AVELAANTKGICFIR.[T]	1xBiotin [K9]; 1xCarbamidomethyl [C12]	2	19	P29401	P29401 [457-471]	P29401 1xBiotin [K465]	Transketolase [OS=Homo sapiens]	1	1888.98	0.383	0.972	1.192	0.348	0.579	145.7	55.7	52.6	62.7	151.1	132.2	124.7	141.5	199.3	49.5	54.2	72.9	48.1	51.1	76.4	95.3	60.9	22.1	205.5	142.9	146.8	15.9	128.4	164.7	21179.5	24029.4	33841.2	8398.75	9194.32	12370.9	8166.1	8675.43	12967.4	16183.7	10343.4
[K].AAFQSQYKSHFVAASLSNQK.[A]	1xBiotin [K8]	2	26	Q86XP3-1	Q86XP3-1 [701-720]	Q86XP3-1 1xBiotin [K708]	ATP-dependent RNA helicase DDX42 [OS=Homo sapiens]	1	2438.19	0.827	0.988	0.834	0.697	0.556	93.6	93	91.9	70.1	131.8	119.6	90.4	95.2	118.8	70.3	98.2	94.6	47.9	102.5	93.4	60	85.5	71.3	113.9	133.9	133.9	114.7	121.6	153.8	69879.7	73550.4	91775.5	54301.8	75914.6	73078.1	37047.3	79240.2	72181.5	46367.9	66110.4
[R].KAYGQALAK.[L]	1xBiotin [K1]	2	11	P29401	P29401 [319-327]	P29401 1xBiotin [K319]	Transketolase [OS=Homo sapiens]	1	1175.62	0.444	1.118	0.713	0.354	0.556	143.8	63.8	71.4	47.2	184.4	89.3	144	124.3	170.2	65.8	63	63.9	71.5	48.1	75.5	45.3	47.3	53.9	213.2	184.6	162.6	80.5	96.9	89.4	22424.6	19353.9	26498.7	10244.9	9805.98	9953.17	11126.3	7483.48	11761.4	7049.96	7365.72
[K].IKTLFPLIEAK.[K]	1xBiotin [K2]	1	13	P13010	P13010 [533-543]	P13010 1xBiotin [K534]	X-ray repair cross-complementing protein 5 [OS=Homo sapiens]	1	1498.87	0.956	0.944	0.99	0.794	0.554	109.6	100.7	74.7	76.3	100.8	137.8	13.9	125.2	125.4	52.4	119.8	114.9	64.2	113.2	85.3	87.2	112.1	49.6	115.1	25.3	142.6	126.9	169.7	157.3	2254.8	20267.6	20302.2	8487.1	19403.4	18613.4	10395.5	18325	13811	14113.4	18146.5
[K].VYIYHSSSKGLLR.[Q]	1xBiotin [K9]	2	16	P26006	P26006 [399-411]	P26006 1xBiotin [K407]	Integrin alpha-3 [OS=Homo sapiens]	1	1748.92	0.599	1.321	0.304	0.859	0.543	155.8	89.1	117.7	39.3	137.1	61	119.5	157.9	159.6	71.6	90.3	104.3	119.3	133	99.9	40.4	39.8	28.5	115.4	185.4	138.9	74.4	61.9	60	51453	67993.9	68725.3	30822.4	38869.1	44902.5	51360.4	57244	43015.6	17399.6	17131.3
[R].KVCNGIGIGEFK.[D]	1xBiotin [K1]; 1xCarbamidomethyl [C3]	4	7	P00533-1	P00533-1 [335-346]	P00533-1 1xBiotin [K335]	epidermal growth factor receptor [OS=Homo sapiens]	1	1547.77	0.664	1.427	0.255	0.592	0.542	113.1	75.1	107.1	27.3	180.9	96.6	111.9	104.3	112.5	63.8	74.2	138.8	96.1	117.4	105.9	27	57.5	21.1	218.3	178.9	145.2	25.6	95.5	105.9	10598.8	9877.08	10661.2	6042.84	7034.53	13152.9	9100.69	11123.6	10035.4	2561.13	5444.59
[R].GFSNEVSSKNR.[I]	1xBiotin [K9]	1	1	Q9H0G5	Q9H0G5 [216-226]	Q9H0G5 1xBiotin [K224]	Nuclear speckle splicing regulatory protein 1 [OS=Homo sapiens]	1	1450.67	0.927	0.664	1.142	0.275	0.539	89.5	83.6	55	52	223.6	96.4	83.6	91	81.8	78.1	84.4	61.5	51.3	40.8	65.7	46.6	48.5	94.2	86.1	238.5	208.7	90	75.1	274.3	3602.81	3922.72	3527.45	3365.49	3637.49	2649.64	2211.95	1759.3	2832.09	2008.69	2091.89
[K].GTLLGESLKLK.[V]	1xBiotin [K]	2	17	O75663	O75663 [118-128]	O75663 1xBiotin [K]	TIP41-like protein [OS=Homo sapiens]	1	1384.79	0.807	1.07	0.875	0.744	0.539	98.3	79.3	84.5	73.9	126.7	137.2	98.7	108.7	96	69.4	79.6	91.8	98.1	84.8	75.4	114.1	74.2	53.1	132	127.1	99.8	151	137.7	108.4	20543.8	22640.7	19997.6	14458.1	16577.8	19107.7	20437	17656.1	15697.5	23748.6	15449
[K].FHYKTDQGIK.[N]	1xBiotin [K4]	1	24	P04040	P04040 [234-243]	P04040 1xBiotin [K237]	catalase [OS=Homo sapiens]	1	1462.71	0.894	0.999	0.392	0.625	0.538	114.4	102.3	102.2	40.1	163.4	77.7	105.3	123.9	114.6	84.7	102.5	122.9	103.7	100.4	102.4	49.4	40.2	38.5	179.2	163.8	131	77.8	91.8	67.8	288365	339531	313906	232151	280734	336768	284062	275138	280457	135460	109998
[K].YSFGATCVKK.[C]	1xBiotin [K]; 1xCarbamidomethyl [C7]	4	11	P00533-1	P00533-1 [285-294]	P00533-1 1xBiotin [K]	epidermal growth factor receptor [OS=Homo sapiens]	1	1386.65	0.848	0.987	0.261	0.526	0.519	121.2	102.8	101.5	25.7	192.9	56	94.2	122.4	129.1	72	103.8	137.3	109.8	95	102.5	26	24.8	31.8	194.9	223.3	179.7	35.5	61.3	56.6	10227.5	13296.4	14016	7819.93	11277.4	14905.8	11925.9	10320.4	11135.6	2822.56	2692.69
[K].YTQELTLKR.[Q]	1xBiotin [K8]	8	25	P23229-1	P23229-1 [587-595]	P23229-1 1xBiotin [K594]	integrin alpha-6 [OS=Homo sapiens]	1	1377.72	0.639	1.254	0.31	0.808	0.504	136.6	88	110.4	34.2	162.9	67.9	187.7	132.8	131.7	85.6	89.4	84.1	134.8	99.5	107.3	46.7	33.3	30.8	166.9	158.4	113.7	69.3	66	62.1	98716.5	69824.5	69251.1	45019.5	47039	44230.9	70880.3	52331.4	56443.1	24545.4	17498.6
[K].GQPLCVLSAMK.[M]	1xBiotin [K11]; 1xCarbamidomethyl [C5]	1	3	P11498	P11498 [1134-1144]	P11498 1xBiotin [K1144]	pyruvate carboxylase, mitochondrial [OS=Homo sapiens]	0	1429.7	0.88	0.877	0.815	0.815	0.501	69.6	93.5	80	60.9	97.3	198.8	61.7	51.9	181.7	45.6	114.7	82.9	71	100.5	61.6	92.6	54	50.2	86.3	75.6	236.5	72.1	176.3	184.8	2743.33	2305.66	8077.93	2028.96	5097.26	3684.48	3154.19	4468.27	2738.48	4117.43	2399.52
[R].IKTSDVTSTK.[G]	1xBiotin [K2]	1	8	P26196	P26196 [85-94]	P26196 1xBiotin [K86]	Probable ATP-dependent RNA helicase DDX6 [OS=Homo sapiens]	1	1305.67	0.791	1.294	0.658	0.602	0.501	93.9	74.2	96.1	59.7	156.8	119.3	96.9	114.4	86.7	76.6	72.2	81.3	55	99.2	110.4	61.7	36.2	81.3	183.5	161.9	100.7	107.1	151.8	123.1	8872.14	10474.8	7937.53	7017.75	6615.78	7446.92	5039.12	9083.56	10107.5	5646.77	3316.86
[R].GTAKANVGAGK.[K]	1xBiotin [K4]	4	3	P62847-4	P62847-4 [119-129]	P62847-4 1xBiotin [K122]	Isoform 4 of 40S ribosomal protein S24 [OS=Homo sapiens]	1	1199.62	0.357	1.024	1.047	0.369	0.499	170.6	60.9	63.1	65	145.1	95.4	77.9	195.2	164.9	37.4	69.3	58.8	36.3	61	71	62.8	42.5	74.3	192.3	140.3	130.5	207.9	92.3	85.1	4071.85	10198.4	8616.27	1956.17	3620.57	3074.12	1898.85	3185.38	3709.05	3281.36	2220.53
[K].EAAGKSSGPTSLFAVTVAPPGAR.[Q]	1xBiotin [K5]	2	15	Q00839	Q00839 [182-204]	Q00839 1xBiotin [K186]	Heterogeneous nuclear ribonucleoprotein U [OS=Homo sapiens]	1	2397.22	0.476	0.498	3.406	0.231	0.494	115.2	54.8	27.3	93.1	118.1	191.5	27.9	124.6	151	35.4	59.3	71.4	12.8	29.6	55.1	100.7	108.8	97.5	138.2	127.7	115.3	117.3	207.2	220.2	3905.04	17445.7	21143.5	4950.86	8307.17	9995.67	1798.37	4138.96	7721.58	14095.8	15242.8
[R].NIGKTLVTR.[T]	1xBiotin [K4]	1	7	P61247	P61247 [43-51]	P61247 1xBiotin [K46]	40S ribosomal protein S3a [OS=Homo sapiens]	1	1227.69	0.327	0.993	1.525	0.296	0.482	140.3	45.9	45.6	69.6	154.3	144.2	143.9	160.9	132.2	26	47.1	79.2	31.5	46.8	74.8	63.5	71.9	71.3	158.2	168.2	122.5	102.4	147.9	151.7	18729.3	20943.3	17217.2	3382.21	6130.77	10312.5	4106.95	6089.18	9735.58	8266.6	9357.5
[K].ISKGANPVEIR.[R]	1xBiotin [K3]	2	23	P10809	P10809 [131-141]	P10809 1xBiotin [K133]	60 kDa heat shock protein, mitochondrial [OS=Homo sapiens]	1	1409.76	0.639	0.919	1.026	0.413	0.473	117.3	67.1	61.7	63.3	149.3	141.3	84.7	119.3	135	58.3	68.2	86.3	60.3	62.7	67.6	58.6	64.4	70.2	194.4	151.9	115.6	143.7	148.3	110.6	34459.9	48562.5	54968	23749.7	27762.7	35116.5	24562.5	25523.9	27531.4	23850.9	26194.8
[K].VLGTVKWFNVR.[N]	1xBiotin [K6]	4	4	P16989-1	P16989-1 [91-101]	P16989-1 1xBiotin [K96]	Y-box-binding protein 3 [OS=Homo sapiens]	1	1544.84	0.588	0.856	1.269	0.636	0.472	120.7	71	60	81.4	94.3	172.6	65.4	113	250.3	79.7	53.6	66.5	45.9	56.1	70.4	79.5	58.2	76.2	41.5	88.2	234.3	53.5	161.6	206	2999.02	5179.85	11473.9	3651.89	2457.89	3047.21	2104.9	2573.77	3225.1	3644.41	2670.17
[K].GEVFNELVGKQR.[I]	1xBiotin [K10]	5	20	P05556-1	P05556-1 [229-240]	P05556-1 1xBiotin [K238]	Integrin beta-1 [OS=Homo sapiens]	1	1601.81	0.766	1.134	0.32	0.756	0.464	130.3	99.8	113.2	36.2	149.7	70.8	117.8	133.6	144.2	71.5	102.4	113.9	113.8	119.2	116.1	40	37.1	25.4	162.6	153.6	122.7	72.6	86.2	67.3	26520	30073.8	32459.4	16105.7	23051.4	25640.6	25605.7	26824.5	26134.1	9007.71	8361.53
[-].MATAEVLNIGKK.[L]	1xBiotin [K]; 1xMet-loss+Acetyl [N-Term]	2	4	P22234	P22234 [1-12]	P22234 1xBiotin [K]; 1xMet-loss+Acetyl [N-Term]	multifunctional protein ADE2 [OS=Homo sapiens]	1	1411.76	0.692	1.123	0.709	0.545	0.463	77.1	77.7	87.2	61.8	162.7	133.5	73.4	52.8	182	36.6	86.5	73.9	76.7	83	88.1	58.8	52.3	72	88.9	161.5	154.8	86.5	245.3	127	3438.2	2476.09	8531.26	1713.63	4052.34	3464.53	3594.39	3889.02	4128.36	2756.58	2451.93
[R].IGDLQAFQGHGAGNLAGLKGR.[L]	1xBiotin [K19]	4	15	P08195	P08195 [227-247]	P08195 1xBiotin [K245]	4F2 cell-surface antigen heavy chain [OS=Homo sapiens]	1	2306.18	0.825	0.682	0.26	0.588	0.459	153.4	126.5	86.4	35.9	146.9	50.8	151.5	97.7	184.3	113	124.9	127.8	59.6	148.5	85.3	10.1	38.6	35.4	159	137.3	145.1	47.5	50.2	84.1	32303.9	20843.4	39304.4	24101	26639.6	27260.4	12703.5	31673.9	18181.1	2161.98	8220.99
[R].AMKTVFGVEPDLTR.[E]	1xBiotin [K3]; 1xOxidation [M2]	2	6	Q96KP4	Q96KP4 [400-413]	Q96KP4 1xBiotin [K402]	cytosolic non-specific dipeptidase [OS=Homo sapiens]	1	1805.89	0.533	1.46	0.633	0.635	0.448	118.5	63.2	76.5	48.4	155.5	138	223	113.8	61.6	60.7	75.4	44.5	127.2	73.5	65	82.3	32.6	46.5	200.2	77	149.3	162.1	132.5	72.8	12228.3	6237.83	3376.91	3325.7	4136.15	2440.92	6973.33	4027.6	3563.79	4513.48	1787.59
[R].EMHKTLK.[L]	1xBiotin [K4]; 1xOxidation [M2]	3	4	Q96L93-1	Q96L93-1 [1226-1232]	Q96L93-1 1xBiotin [K1229]	Kinesin-like protein KIF16B [OS=Homo sapiens]	1	1128.55	0.603	1.047	1.03	0.502	0.446	103.5	62.4	69.3	71.4	133.4	160.1	92.6	141.6	65.5	72.9	55.8	49.7	65.2	52	62	70.9	63.9	53.2	260	119.4	103.5	209	143.3	119.5	1.81385e+06	2.77342e+06	1.2822e+06	1.4284e+06	1.09332e+06	972674	1.27626e+06	1.01835e+06	1.21443e+06	1.38874e+06	1.25096e+06
[R].GAPLAKVVFR.[D]	1xBiotin [K6]	1	20	P62917	P62917 [55-64]	P62917 1xBiotin [K60]	60S ribosomal protein L8 [OS=Homo sapiens]	1	1283.73	0.292	1.167	0.981	0.374	0.444	168.8	49.2	57.5	52.5	153.7	118.2	167.7	190.6	127.7	49.2	42.3	48.9	61	47.3	57.1	59.8	52.2	50.9	158.7	152.7	149	117.4	156.3	111.1	29928.6	34017.7	22789.8	8784.39	7554.44	8728.25	10886.4	8446.59	10184.8	10675.4	9306.67
[K].AGLVIGKGGETIK.[Q]	1xBiotin [K7]	3	2	Q96AE4	Q96AE4 [197-209]	Q96AE4 1xBiotin [K203]	Far upstream element-binding protein 1 [OS=Homo sapiens]	1	1468.82	0.67	1.423	0.487	0.37	0.443	137.4	43.5	66.7	31.5	180.5	140.4	36.6	147.1	158.4	46.4	46.5	106.1	66.1	71.5	79	69.5	32.2	33.7	70.1	264.5	193.2	72.7	156.1	150.4	1972.82	7931.37	8538.99	2502.75	2508.98	5722.31	3561.17	3851.89	4258.29	3745.05	1733.85
[R].YKSQDPR.[N]	1xBiotin [K2]	2	5	P29401	P29401 [58-64]	P29401 1xBiotin [K59]	Transketolase [OS=Homo sapiens]	1	1119.53	0.387	1.136	1.001	0.395	0.44	136.9	57.7	59.1	59.2	152.5	134.6	203.8	124.4	119.1	67.7	52.4	46.1	83.2	52.4	53.8	64.3	53.8	53.1	210.9	138.6	110.4	151.1	122.4	92.4	81834	49954.1	47837.6	27172.9	21055.9	18518.7	33427.4	21042	21587.5	25799	21613.3
[R].YSLKIQPVEK.[M]	1xBiotin [K4]	2	1	Q4G148-1	Q4G148-1 [106-115]	Q4G148-1 1xBiotin [K109]	Glucoside xylosyltransferase 1 [OS=Homo sapiens]	1	1430.77	0.642	0.966	1.009	0.58	0.438	107.8	65.6	79.6	75.1	100.5	171.5	54.7	143.1	114.9	69.9	56.5	91.9	88.8	50.3	84.9	80	93.3	50.8	107.2	94	153	45.2	238.6	182.9	2110.7	5519.04	4433.86	2696.87	2180.74	3543.2	3423.61	1941.75	3274.17	3087.73	3597.35
[R].AMKTVFGVEPDLTR.[E]	1xBiotin [K3]	2	2	Q96KP4	Q96KP4 [400-413]	Q96KP4 1xBiotin [K402]	cytosolic non-specific dipeptidase [OS=Homo sapiens]	1	1789.9	0.706	1.36	0.626	1	0.425	100.2	70.8	96.3	60.3	96.3	176.1	107.4	50.3	182.8	75.8	102.5	65.5	105	102.5	103.1	46.3	64.6	82.9	46.4	103.1	105.9	71.9	195.1	188.7	4065.87	1904.95	6921.01	2871.64	3880.02	2480.82	3975.31	3881.91	3904.74	1752.22	2446.23
[R].AQGGQTQSPTKSHTPSPTSPK.[S]	1xBiotin [K11]	2	6	P40123	P40123 [294-314]	P40123 1xBiotin [K304]	Adenylyl cyclase-associated protein 2 [OS=Homo sapiens]	1	2348.13	0.576	0.885	0.798	0.579	0.393	135.7	78.2	67.1	53.5	115.9	149.5	117.7	132.4	133.7	76.3	59.6	81.6	65.4	63.7	72.2	64.7	52.2	39.1	224.6	104.5	113.1	145.8	99.5	153.9	9716.83	10934.6	11039.6	6300.53	4925.56	6734.8	5403.7	5262.69	5959.74	5345.24	4312.13
[K].AAWGKVGAHAGEYGAEALER.[M]	1xBiotin [K5]	1	1	P69905	P69905 [13-32]	P69905 1xBiotin [K17]	Hemoglobin subunit alpha [OS=Homo sapiens]	1	2269.08	2.443	0.643	0.408	1.801	0.376	75.7	184.9	118.8	43.3	62.4	114.9	71.9	48.3	130.9	120	188.5	175.8	65.9	156.1	113	41.1	36.3	63.7	59.4	36.6	138.5	54.7	109.3	190.2	3613.56	2424.69	6575.32	6024.9	9464.84	8828.12	3307.53	7841.2	5674.49	2065.29	1821.15
[R].LLKASIPFSVVGSNQLIEAK.[G]	1xBiotin [K3]	3	5	Q15019	Q15019 [230-249]	Q15019 1xBiotin [K232]	septin-2 [OS=Homo sapiens]	1	2340.3	0.659	0.761	0.699	0.485	0.376	143.7	84.4	64.2	37.7	132.3	137.7	43.9	158	181.1	28.9	92.7	122.3	48.4	86.6	70.6	41.4	83.6	33.8	48.2	145.4	206.8	34.3	151.3	222.6	3513.44	12647.7	14499.9	2316.51	7423.09	9794.16	3874.95	6937.47	5649.16	3315.07	6696.48
[K].WGFTGQKTEEVK.[Q]	1xBiotin [K7]	2	3	Q9NYU2-1	Q9NYU2-1 [1238-1249]	Q9NYU2-1 1xBiotin [K1244]	UDP-glucose:glycoprotein glucosyltransferase 1 [OS=Homo sapiens]	1	1635.78	0.723	0.629	1.458	0.394	0.369	61.1	80.5	50.6	73.8	128.6	205.4	60.1	151.3	58.4	96.7	79.2	42.2	49.8	41.3	50.8	58.4	82.2	72.6	59.2	194.9	126.5	216	158.4	202	2591.16	6527.93	2518.85	4169.83	3416.26	1821.66	2147.73	1779.52	2193.18	2517.6	3544.56
[R].KPIDYTILDDIGHGVK.[WV]	1xBiotin [K1]	4	1	Q9NYB9	Q9NYB9 [139-154]	Q9NYB9 1xBiotin [K139]	abl interactor 2 [OS=Homo sapiens]	0	2010.04	0.296	1.315	1.157	0.663	0.365	132.4	39.2	51.5	80	77.7	219.2	62	136.9	239.5	40.5	42.8	38.5	53.2	47.6	72.1	83.4	82.7	47.3	80.3	59.9	188.4	37.4	261.1	226.6	3018.53	6666.81	11663.2	1971.48	2086.73	1875.93	2592.95	2317.45	3509.36	4059.59	4028.54
[R].TKNISAISYINQR.[N]	1xBiotin [K2]	1	2	Q92541	Q92541 [554-566]	Q92541 1xBiotin [K555]	RNA polymerase-associated protein RTF1 homolog [OS=Homo sapiens]	1	1733.9	0.653	1.191	0.656	1.042	0.364	102.7	62.1	84	55.1	80.6	215.6	71.9	106.8	147.6	61.1	96.3	64.5	72.8	87.4	97.2	57.3	87.1	46.3	62.2	83.8	97.5	96.5	224.2	239.5	2672.81	3971.47	5488.14	2273.4	3581.89	2400.63	2708.59	3249.28	3613.37	2130.49	3239.91
[K].GFGGKFGVQTDR.[Q]	1xBiotin [K5]	3	35	Q14247-1	Q14247-1 [231-242]	Q14247-1 1xBiotin [K235]	Src substrate cortactin [OS=Homo sapiens]	1	1494.72	0.555	1.175	0.758	0.481	0.362	112.3	63.8	72.9	55.3	147.2	148.5	98.8	118.8	111.5	44.5	63.4	65.9	77.5	72.3	61.6	55	54.9	49.1	216.9	146.2	127.9	152	147.4	136.3	81850.9	98489.2	92422	36867.6	52515.4	54644.1	64227.6	59959.8	51024.8	45579.6	45469.3
[K].HAAENPGKYNILGTNTIMDK.[M]	1xBiotin [K8]; 1xOxidation [M18]	2	2	Q00839	Q00839 [517-536]	Q00839 1xBiotin [K524]	Heterogeneous nuclear ribonucleoprotein U [OS=Homo sapiens]	1	2429.16	0.443	1.522	0.771	0.488	0.356	110.5	48.9	74.5	57.4	152.5	156.2	79	135.8	112.1	54.6	40.7	49.6	48.5	88.5	75.5	63.8	44.6	58.2	149	154.6	157.5	179.1	158.3	150.6	3613.84	6212.07	5125	2496.43	1860.27	2268.04	2216.09	4045.76	3451.79	2919.44	2038.5
[K].VIPELNGKLTGMAFR.[V]	1xBiotin [K8]	2	7	P04406-1	P04406-1 [220-234]	P04406-1 1xBiotin [K227]	glyceraldehyde-3-phosphate dehydrogenase [OS=Homo sapiens]	1	1871.99	2.981	0.966	0.597	0.799	0.349	31.9	125.3	49.6	49.3	126.3	217.6	53.3	36.4	29.5	44.5	143	158.9	51.3	153.6	56.6	56.3	91.7	27.3	64.1	144.7	144.1	34.2	262.4	248.3	3442.2	2347.55	1904.26	2870.75	9232.91	10260.5	3309.5	9915.15	3655.7	3632.69	5919.88
[K].FGKHGGTIPIVPTAEFQDR.[I]	1xBiotin [K3]	3	6	P00367	P00367 [478-496]	P00367 1xBiotin [K480]	Glutamate dehydrogenase 1, mitochondrial [OS=Homo sapiens]	1	2296.15	0.698	0.982	0.598	0.697	0.345	114.4	79.8	52.2	48.5	164.5	140.6	33.9	123.3	215.9	55.1	86.1	122.2	56.3	129.6	54.2	52.3	55.7	32.4	55.5	177.4	186	41.7	151.6	170.9	2094.26	7624.91	13345.2	3408.35	5321.59	7554.6	3481.74	8008.92	3347.94	3232.48	3441.55
[K].VDSSKMDK.[V]	1xBiotin [K5]	2	3	Q86XP3-1	Q86XP3-1 [904-911]	Q86XP3-1 1xBiotin [K908]	ATP-dependent RNA helicase DDX42 [OS=Homo sapiens]	1	1135.51	0.663	1.179	1.064	0.202	0.339	62.4	41.4	48.8	52	242.1	153.3	62.1	51.6	176.3	66.8	41.2	36.1	51.8	47.9	48.6	67.9	51.7	44.7	48.5	241.1	263.7	48.3	152.6	299	3160.94	2624.6	8968.44	3396.16	2097.27	1837.81	2635.78	2436.56	2472.99	3454.65	2631.79
[R].LAYIAHPKLGK.[R]	1xBiotin [K8]	1	1	P47914	P47914 [96-106]	P47914 1xBiotin [K103]	60S ribosomal protein L29 [OS=Homo sapiens]	1	1436.81	0.386	0.901	0.919	0.365	0.331	150	57.3	53.9	46.7	147.5	144.6	173.5	149.2	130.5	55.4	56.9	67	49.9	53.6	55.2	53.3	45.9	46.5	146.6	165	118.5	143.8	150.8	138.4	21170.5	18199	15922.3	6755.92	6947.04	8180.46	6090.24	6536.8	6732.19	6508.36	5596.34
[K].ELGYTVKK.[H]	1xBiotin [K]	1	5	P30533	P30533 [333-340]	P30533 1xBiotin [K]	alpha-2-macroglobulin receptor-associated protein [OS=Homo sapiens]	1	1163.61	0.359	1.097	0.966	0.4	0.33	136.9	49.2	54	55.8	135.1	168.9	66.2	229	136.3	76.2	40	49	53.8	53.1	64.3	62.1	32.4	55.6	110.2	134.5	190.6	75.5	168.2	203.1	3542.93	12252.8	7295.3	4075.92	2142.06	2622.02	2877.07	2838.86	3438.25	3323.06	1731.84
[R].VNAKTYIEKEDD.[-]	1xBiotin [K4]	1	2	Q9H0G5	Q9H0G5 [547-558]	Q9H0G5 1xBiotin [K550]	Nuclear speckle splicing regulatory protein 1 [OS=Homo sapiens]	2	1650.77	0.609	0.81	1.842	0.172	0.327	68.2	41.5	34.3	63.3	199.3	193.4	61.8	50.4	116.7	35.1	37.6	56.8	28.5	38.1	31.1	57.3	56.6	59.6	156.4	180.5	305.9	47.4	175.1	305	3935.92	3208.58	7433.97	2239.43	2397.12	3619.44	1814.17	2428.25	1981.17	3649.81	3606.68
[K].LKMAPVPLDDSNRPASLTK.[D]	1xBiotin [K2]; 1xOxidation [M3]	4	4	Q9NYF8-1	Q9NYF8-1 [549-567]	Q9NYF8-1 1xBiotin [K550]	Bcl-2-associated transcription factor 1 [OS=Homo sapiens]	1	2295.18	0.495	0.58	1.326	0.287	0.319	135.2	66.9	36	67.8	125.4	168.7	34.9	193.7	129.8	57.1	64.3	65.7	54.3	33.1	34.6	65.1	71.9	32.4	183.5	119.9	120.4	225.8	151.2	162	1939.95	10756.1	7210.34	3172.39	3570.01	3648.42	3013.97	1838.4	1921.45	3615.26	3995.32
[K].KPKNENPVDYTVQIPPSTTYAITPMK.[R]	1xBiotin [K]	7	5	Q12906-1	Q12906-1 [346-371]	Q12906-1 1xBiotin [K]	Interleukin enhancer-binding factor 3 [OS=Homo sapiens]	1	3158.59	1.797	0.754	1.028	1.58	0.31	64.1	149.2	57.4	64.9	35.7	228.7	25.8	53.9	173.6	46.4	125.6	253	48.3	190.8	39.9	54.6	65.7	41	25.3	30.1	187.5	34.2	192.4	211.9	1864.59	3896.24	12536	3349.82	9069.31	18272.9	3491.15	13779.7	2882.46	3942.52	4743.26
[R].QQEGFKGTFPDAR.[E]	1xBiotin [K6]	2	21	Q15233	Q15233 [366-378]	Q15233 1xBiotin [K371]	Non-POU domain-containing octamer-binding protein [OS=Homo sapiens]	1	1706.8	0.438	0.961	1.236	0.282	0.305	118	51.7	45.5	60.2	161	163.6	92.5	113.7	137.5	53.6	41.9	49.8	58.6	40.3	43.8	37.4	57.9	72.4	162.9	155	147.8	237.9	139.2	157.6	16668.3	20473	24771.1	9654.44	7553.38	8969.81	10558.7	7255.17	7887.24	6744.21	10432.5
[K].GFGGKYGVQK.[D]	1xBiotin [K5]	3	2	Q14247-1	Q14247-1 [305-314]	Q14247-1 1xBiotin [K309]	Src substrate cortactin [OS=Homo sapiens]	1	1266.63	0.278	1.445	0.827	0.298	0.287	133	36.9	53.3	44.1	178.8	153.9	116.1	131.9	134.7	20.2	36.6	67.2	60	52.9	51.3	31.4	51.8	43.7	189.6	177.3	175.3	146.3	161.1	152.6	14725.1	16722.1	17086.3	2556.23	4644.07	8516.17	7609.6	6708.4	6503.11	3986.5	6563.21
[K].KLSSWDQAETPGHTPSLR.[W]	1xBiotin [K1]	1	5	O75533-1	O75533-1 [214-231]	O75533-1 1xBiotin [K214]	splicing factor 3B subunit 1 [OS=Homo sapiens]	1	2236.08	0.609	1.098	0.798	0.505	0.285	107.7	65.6	64.5	51.4	127.7	183.2	34.2	123.2	197.6	29	75	88.1	37.2	96.7	73.7	44.6	61.5	58.8	156.2	146.1	114.2	38.5	209.6	215.8	2129.5	7663.88	12289.4	1802.83	4665.07	5476.14	2313.85	6011.29	4585.9	2772.77	3826.96
[K].TGFGGKFGVQSER.[Q]	1xBiotin [K6]	1	18	Q14247-1	Q14247-1 [267-279]	Q14247-1 1xBiotin [K272]	Src substrate cortactin [OS=Homo sapiens]	1	1595.76	0.447	1.033	0.883	0.35	0.285	126	58.7	52.9	46.8	151.2	164.5	99	152	121.2	56.4	40.4	67.9	70.1	48.5	50.9	50.4	45	43.6	203.8	145.4	133.1	158.2	152.8	161.3	22131.6	33984.6	27092.8	12620	9027.9	15181.5	15677.8	10853.4	11385.7	11262.7	10056.9
[K].AGDSLMVMIAMKMEHTIK.[S]	1xBiotin [K]; 1xOxidation [M]	1	34	Q96RQ3	Q96RQ3 [670-687]	Q96RQ3 1xBiotin [K]	Methylcrotonoyl-CoA carboxylase subunit alpha, mitochondrial [OS=Homo sapiens]	1	2248.07	1.536	0.906	0.468	0.473	0.284	69.4	106.6	96.5	15.5	175	137	27.9	58.9	347	115	81.8	90.4	6.1	125.3	81.9	12.5	58.7	13.1	69.5	148.4	265	44.2	138.2	116.1	8855.3	18674.8	110096	36476	25971.3	28686	1942.39	39773.4	25979.7	3975.67	18615.1
[K].IFQKGESPVDYDGGR.[T]	1xBiotin [K4]	5	17	Q15084-1	Q15084-1 [242-256]	Q15084-1 1xBiotin [K245]	Protein disulfide-isomerase A6 [OS=Homo sapiens]	1	1893.88	0.276	0.923	1.332	0.229	0.268	141.3	39	35.9	47.9	156.9	178.9	148.4	146	141.4	32.4	52.6	40.2	37.1	21.2	49.1	49.4	57.3	31.3	169.2	113.6	162.1	187.8	175.8	184.8	60627.6	59649.7	57764.1	13247.2	21476.8	16438	15167	8679.74	20067.6	20201.8	23400.2
[R].TKELGYTVK.[K]	1xBiotin [K2]	1	6	P30533	P30533 [331-339]	P30533 1xBiotin [K332]	alpha-2-macroglobulin receptor-associated protein [OS=Homo sapiens]	1	1264.66	0.341	1.08	0.637	0.389	0.259	157.9	56.1	60.6	33.6	142.9	148.9	90.6	185.6	174	21.5	61.9	63.3	20	66.8	69.2	33.3	44.1	37.1	135.6	157.5	178.1	128.6	164.2	168.5	11353	23253.4	21803.8	2690.77	7750.86	7929.4	2504.93	8370.94	8674.05	4175.8	5525.61
[R].KPIDYTVLDDVGHGVK.[WH]	1xBiotin [K1]	11	9	Q8IZP0	Q8IZP0 [139-154]	Q8IZP0 1xBiotin [K139]	abl interactor 1 [OS=Homo sapiens]	0	1982.01	0.313	0.709	1.213	0.184	0.258	146.5	45.9	32.6	34.3	177.3	163.5	141	139.6	168.7	34.6	53.7	44.2	27.1	34.8	31.4	54.4	33	32.9	170.7	207.7	131.5	127.5	209.9	157.4	16650	16491.2	19919.7	4082.12	6337.66	5219.22	3200.32	4112.39	3702.32	6429.62	3898.93
[K].VIATKVLGTVK.[W]	1xBiotin [K5]	4	14	P16989-1	P16989-1 [86-96]	P16989-1 1xBiotin [K90]	Y-box-binding protein 3 [OS=Homo sapiens]	1	1354.81	0.4	1.067	0.709	0.411	0.256	133.9	47.7	61.6	33.2	149.8	173.8	25.1	164.6	192.2	29.6	76.9	58.6	21.2	75.7	82.1	36	58.2	40.8	95.5	184.2	189.9	28.9	213.7	227	2997.05	19667.4	22971.2	3535.13	9194.3	6998.84	2538.02	9041.29	9807.68	4301.55	6956.26
[R].KSTDSPVECMGQEK.[G]	1xBiotin [K1]; 1xCarbamidomethyl [C9]	1	11	P13726-1	P13726-1 [233-246]	P13726-1 1xBiotin [K233]	tissue factor [OS=Homo sapiens]	1	1821.78	0.88	1.049	0.236	0.553	0.248	142.2	87.3	91.6	20	165.5	93.5	23.5	153.1	176.4	28.6	94.1	155.3	33.9	144	98.7	34	19.8	21.5	147.4	230	178.3	23.5	137.2	100.7	2468.9	16106.2	18556.3	3007.78	9895.17	16329.1	3568.42	15146.5	10375.6	3576.89	2083.05
[R].EVALDLSQHKGVAVR.[R]	1xBiotin [K10]	2	1	O00391	O00391 [202-216]	O00391 1xBiotin [K211]	Sulfhydryl oxidase 1 [OS=Homo sapiens]	1	1847.98	0.309	1.454	0.651	0.348	0.245	132.4	40.9	59.4	38.7	170.9	157.7	222.8	117.9	111.5	64.9	34.8	36.4	63.6	52.9	50.7	31.3	48.2	34.5	186.8	152.1	139.5	137.6	140.4	173.9	12818.8	6781.81	6412.19	3732.65	2004.68	2094.45	3661.53	3044.41	2917.91	1802.3	2773.69
[R].KGLFFEHDLR.[G]	1xBiotin [K1]	1	1	O15234	O15234 [185-194]	O15234 1xBiotin [K185]	Protein CASC3 [OS=Homo sapiens]	1	1487.75	0.437	0.78	0.797	0.251	0.245	136.1	56.2	43.9	32.8	174.6	156.5	38.5	156.8	147	50.7	68.6	60.8	29.2	47.4	56.4	31.9	45	35.4	182.6	188.6	213.2	95.3	183.6	169	3368.34	13732.7	12871.2	4440.87	6007.15	5319.82	2560.34	4148.24	4939.99	2795.83	3937.24
[R].EKGPDPLQYMR.[A]	1xBiotin [K2]	3	2	P02458-1	P02458-1 [1161-1171]	P02458-1 1xBiotin [K1162]	Isoform 1 of Collagen alpha-1(II) chain [OS=Homo sapiens]	1	1559.73	0.565	1.142	1.286	0.326	0.244	61.2	34.6	48.1	61.9	122.7	271.5	63.6	61.2	146.2	71.4	35.2	35.9	40.2	50	51.5	64.3	47	70.5	123.5	172.8	127.6	67.3	289.4	282.3	3373.56	3243.86	7753.61	3788.07	1868.04	1906.49	2134.17	2654.69	2729.45	3412.78	2493.39
[K].TAASAPANVSKGTTPLAPPPKPVR.[R]	1xBiotin [K11]	4	8	Q96D71	Q96D71 [681-704]	Q96D71 1xBiotin [K691]	RalBP1-associated Eps domain-containing protein 1 [OS=Homo sapiens]	1	2554.38	0.31	0.916	0.997	0.221	0.233	131.9	40.9	37.3	37.2	168.7	183.9	43.8	153.6	161.6	47.7	34.9	47.7	43.7	38.8	43.5	31.6	43.4	51.7	196.5	220.4	164.3	40.5	214.2	222.1	3345.41	11726.7	12332.4	3640.74	2660.81	3640.99	3334.13	2965.33	3319.48	2409.47	3311.04
[R].INFDKYHPGYFGK.[V]	1xBiotin [K5]	1	13	P46776	P46776 [43-55]	P46776 1xBiotin [K47]	60S ribosomal protein L27a [OS=Homo sapiens]	1	1811.86	0.317	0.833	1.028	0.332	0.225	135.9	55.5	45.2	41.7	136.1	185.5	97.7	135.1	183.4	31	58	55.2	25.8	61	45	41.5	62.7	29.1	135.3	129.9	158	163.6	203.4	184.4	37402.2	51752.2	70224.6	11862.2	22218.2	21149.5	9882.8	23350.1	17224	15896.6	24004.3
[K].GQPLCVLSAMKMETVVTSPMEGTVR.[K]	1xBiotin [K11]; 1xCarbamidomethyl [C5]; 1xOxidation [M]	1	221	P11498	P11498 [1134-1158]	P11498 1xBiotin [K1144]	pyruvate carboxylase, mitochondrial [OS=Homo sapiens]	1	2963.42	0.702	0.66	0.561	0.497	0.22	134.6	94.5	62.3	27.8	125.4	155.3	33.4	126.9	231	46.2	89.1	102.7	10.5	128.1	58.8	17.9	71.8	26.2	64.8	118.3	214.5	81.3	146.4	232.1	416200	1.58184e+06	2.87812e+06	575524	1.11043e+06	1.28026e+06	131016	1.59656e+06	732397	222740	894909
[R].SELELLKLR.[S]	1xBiotin [K7]	1	3	Q8IYS1	Q8IYS1 [18-26]	Q8IYS1 1xBiotin [K24]	Peptidase M20 domain-containing protein 2 [OS=Homo sapiens]	1	1326.74	0.18	0.842	1.499	0.164	0.213	166.6	29.9	23.9	37.7	164.6	177.3	119.2	203.5	166.9	20.6	30	44.1	23.8	23.9	37.1	35.7	38.8	37.8	145.4	185.1	164.8	133	212.9	177.5	10449.9	17834	14626.2	1802.22	2628	3860.87	2084.94	2093.99	3251.51	3125.45	3402.15
[R].GFGGKFGVQMDR.[V]	1xBiotin [K5]	3	11	Q14247-1	Q14247-1 [120-131]	Q14247-1 1xBiotin [K124]	Src substrate cortactin [OS=Homo sapiens]	1	1524.71	1.013	1.035	0.583	0.369	0.208	61.2	62	72.8	42.5	157.5	204	28.8	66.6	173.5	36.1	67.4	82	24.3	84.9	79.2	45.1	46.8	46.2	122.3	230.2	171.3	41.8	231.6	221.9	2476.54	5734.27	14940.7	3107.66	5807.36	7061.94	2091.97	7311.91	6817.98	3884.84	4031.9
[K].HFEAKIEK.[H]	1xBiotin [K5]	1	25	P30533	P30533 [283-290]	P30533 1xBiotin [K287]	alpha-2-macroglobulin receptor-associated protein [OS=Homo sapiens]	1	1227.62	0.195	1.06	1.091	0.262	0.207	180.4	35.2	37.3	35.1	142.5	169.4	128.1	197.2	187.9	19.9	36.7	47.3	30	40.7	38.9	33.2	44.4	36.5	154.3	148.4	115.6	176.5	202.8	161.5	95748	147445	140460	14865.5	27399.6	35353.9	22457.3	30424.6	29042.6	24811.1	33206.2
[K].KGLTPSQIGVILR.[D]	1xBiotin [K1]	1	10	P62277	P62277 [43-55]	P62277 1xBiotin [K43]	40S ribosomal protein S13 [OS=Homo sapiens]	1	1607.93	0.257	1.485	1.068	0.304	0.205	129.2	33.1	49.2	38.3	161.9	188.2	119.5	130.5	138.5	28.5	33.5	36.6	28.1	57.5	49.7	30	86.3	38.7	154.3	176.3	163.6	190.2	191.5	146.4	10123.3	11055.9	11731.2	2412.2	2836.35	3102.51	2381.39	4871.34	4211.42	2544.04	7310.31
[R].QYAKDIGFIK.[LK]	1xBiotin [K4]	2	9	P62273-1	P62273-1 [45-54]	P62273-1 1xBiotin [K48]	40S ribosomal protein S29 [OS=Homo sapiens]	1	1408.73	0.259	1.11	0.863	0.231	0.197	136.3	35.4	43.8	34.4	176	174.3	110.9	189.1	137.9	41	35.8	32.7	24.2	45.5	44.3	34.8	57.5	20.9	178.1	196.8	167.2	113.8	176.4	193	11002.9	18764.6	13681.6	4072.11	3549.68	3246.02	2398.28	4518.69	4396.32	3451.6	5708.16
[R].LAGAPSEDPQFPKVQWPPR.[E]	1xBiotin [K13]	2	10	O00391	O00391 [488-506]	O00391 1xBiotin [K500]	Sulfhydryl oxidase 1 [OS=Homo sapiens]	1	2346.17	0.375	0.685	1.15	0.185	0.196	146.8	52.2	35.8	37.2	132.5	195.6	36.1	158	189	29.5	56.2	70.8	23.6	38.5	40.6	39.1	46.7	40	128	142.7	270.8	40.9	210.6	238.9	2814.68	12313.8	14726	2299.95	4375.51	5520.21	1841.89	2999.19	3164.54	3044.69	3639.98
[R].VDKSAVGFDYQGK.[T]	1xBiotin [K3]	3	7	Q14247-1	Q14247-1 [169-181]	Q14247-1 1xBiotin [K171]	Src substrate cortactin [OS=Homo sapiens]	1	1639.78	0.334	1.059	0.793	0.229	0.194	129.4	43.2	45.8	29.1	202.5	150	44.3	156.2	135.4	45.3	42.7	45.7	34.6	47.9	60	27.4	30.5	47.9	214.4	150.9	212	205.4	157	142.3	2896.17	10207.3	8852.27	2957.48	2792.49	2986.35	2261.94	3131.93	3924.09	1793.93	1991.61
[K].ESQKPFEVKGPLPVHTK.[S]	1xBiotin [K9]	1	6	P56181-2	P56181-2 [280-296]	P56181-2 1xBiotin [K288]	Isoform 2 of NADH dehydrogenase [ubiquinone] flavoprotein 3, mitochondrial [OS=Homo sapiens]	1	2147.13	0.179	0.972	1.296	0.203	0.184	160.9	27.1	26.3	34.1	166.2	185.4	38.1	237.5	192.1	42.4	26.3	32.4	31.4	21.7	42.2	40.7	45.3	38.3	89.7	198.5	208.2	46.4	221.4	247.3	3344.25	20833.1	16852.7	3720.27	2308.07	2838.25	2758.37	1900.85	3703.38	3573.66	3972.46
[K].ANPFGGASHAKGIVLEK.[V]	1xBiotin [K11]	1	24	P62266	P62266 [38-54]	P62266 1xBiotin [K48]	40S ribosomal protein S23 [OS=Homo sapiens]	1	1922	0.173	0.789	1.438	0.12	0.179	160.6	27.7	21.9	31.5	181.9	176.4	134.6	164.4	167	14.1	28.4	39	16.6	27.8	22.4	32.2	33.4	27.5	189.6	181.9	186.2	180.6	184.2	170.1	81475	99550.4	101094	8530.99	17199.2	23584.5	10026.2	16862.4	13577.1	19526.2	20205.2
[R].YYKNIGLGFK.[T]	1xBiotin [K3]	1	7	P62280	P62280 [36-45]	P62280 1xBiotin [K38]	40S ribosomal protein S11 [OS=Homo sapiens]	1	1428.73	0.232	0.956	1.176	0.265	0.177	166.4	33.9	35.9	42.2	135.7	185.9	161	178	139.5	44.5	32.8	32.3	22	42.6	34.7	41.4	30.8	40.8	155.9	131.3	121.6	179.9	237.5	173.4	13800.4	15255.9	11960.6	3817.47	2812.7	2772.35	1883.58	3650.45	2978.23	3548.35	2637.54
[R].LDPFADGGKTPDPK.[M]	1xBiotin [K9]	1	5	O75533-1	O75533-1 [133-146]	O75533-1 1xBiotin [K141]	splicing factor 3B subunit 1 [OS=Homo sapiens]	1	1683.8	0.261	0.813	1.047	0.141	0.177	144.5	29.2	23.8	24.2	167.9	210.3	21.2	167	168.5	10.7	44	33.7	21.1	33.8	27.4	28	43.5	22.1	155.5	222.1	194	117.7	246.5	242.9	3578.74	28171.8	28438.8	1809.88	7421.4	5693.67	3565.35	5703.74	4631.13	4725.42	7344.75
[K].VAKGQPLCVLSAMKMETVVTSPMEGTVR.[K]	1xBiotin [K]; 1xCarbamidomethyl [C8]	1	7	P11498	P11498 [1131-1158]	P11498 1xBiotin [K]	pyruvate carboxylase, mitochondrial [OS=Homo sapiens]	2	3245.62	1.689	1.017	0.461	0.651	0.17	41.3	80.2	51.3	23.6	149.7	253.9	41.5	36.8	83.1	39.7	80.6	140.3	51.5	147.7	40.4	54.9	23.2	23.7	40.8	150.3	227	41.7	255	321.9	3106.92	2756.1	6224.39	2973.75	6034.54	10511.7	3855.65	11066	3024.83	4108.61	1735.42
[R].GFPTIKIFQK.[G]	1xBiotin [K6]	5	14	Q15084-1	Q15084-1 [236-245]	Q15084-1 1xBiotin [K241]	Protein disulfide-isomerase A6 [OS=Homo sapiens]	1	1404.77	0.38	0.972	0.63	0.287	0.169	134.8	53.2	46.5	29.3	162.2	173.9	113.6	134.7	153.3	34	53.2	58.3	33	57	46.5	29.3	42.9	18	155.9	184.6	162.1	193.7	173.8	156.1	18980.4	22504	25606.6	5675.38	8883.41	9730.5	5519.1	9520.55	7769.44	4896.81	7172.46
[R].EKGPDPLQYMR.[A]	1xBiotin [K2]; 1xOxidation [M10]	3	2	P02458-1	P02458-1 [1161-1171]	P02458-1 1xBiotin [K1162]	Isoform 1 of Collagen alpha-1(II) chain [OS=Homo sapiens]	1	1575.73	0.176	1.036	1.042	0.196	0.161	167.5	29.4	33	34.4	168.2	167.6	161.6	165.3	136.7	28.4	22.2	39	18.1	40.4	31.8	23.3	33.2	36.8	186.6	162.3	138.2	270	161.7	144.3	15408.2	15763.2	13030.4	2706.54	2119.86	3719.89	1727.47	3854.53	3033.91	2221.6	3160.73
[K].DYSSGFGGKYGVQADR.[V]	1xBiotin [K9]	3	11	Q14247-1	Q14247-1 [153-168]	Q14247-1 1xBiotin [K161]	Src substrate cortactin [OS=Homo sapiens]	1	1932.85	0.272	0.947	0.92	0.173	0.161	155.4	35.1	33.2	25.6	191.8	158.9	20.8	173.9	163.2	22	36.8	47.3	23.4	39.3	34.9	23.1	36.1	26.9	224.5	201.5	185.4	216.6	166.9	157.4	2016.65	16853	15818.9	2136.56	3570.05	4587.97	2264.64	3807.75	3380.52	2238.29	3502.43
[K].VAKGQPLCVLSAMKMETVVTSPMEGTVR.[K]	1xBiotin [K14]; 1xCarbamidomethyl [C8]; 1xOxidation [M]	1	9	P11498	P11498 [1131-1158]	P11498 1xBiotin [K1144]	pyruvate carboxylase, mitochondrial [OS=Homo sapiens]	2	3261.62	1.435	0.714	0.384	0.629	0.143	48.3	105.7	75.5	18.1	157.7	194.8	15.9	49.9	212.5	22.8	124.1	109.3	15.6	130.7	78	18.7	50.2	16.4	19.2	163	207.7	14	201.4	350.9	2460.84	7748.76	32970.3	3530.57	19258.7	16959.9	2414.39	20282.5	12107.8	2902.26	7785.41
[R].YESLKGVDPK.[F]	1xBiotin [K5]	1	29	P47914	P47914 [29-38]	P47914 1xBiotin [K33]	60S ribosomal protein L29 [OS=Homo sapiens]	1	1361.68	0.17	1.213	1.034	0.134	0.142	134.8	22.5	27.3	28.3	187.5	199.6	95	138.2	148.2	19.5	23.1	25.2	28.4	28	24.8	29.4	23.9	29.1	189.6	212	192.3	165.1	223.8	204.6	198234	288449	309322	40653	48116.3	52607.8	59328.7	58372.8	51820.9	61328.6	49890.7
[-].MPFSNSHNALKLR.[F]	1xBiotin [K11]; 1xMet-loss [N-Term]	1	16	P12277	P12277 [1-13]	P12277 1xBiotin [K11]; 1xMet-loss [N-Term]	Creatine kinase B-type [OS=Homo sapiens]	1	1609.83	0.435	0.923	0.658	0.24	0.141	100.9	44	37.1	21.5	154.4	242.1	46.2	107.6	127.8	13.5	46.9	63.8	18.9	58.8	39.5	22.9	38.7	19.5	164.7	223.8	159.5	114.7	275	258.2	50696.3	118159	140270	14812	51456.6	69988.6	20764.8	64570.2	43392.5	25135.7	42472
[R].SPAKTIAPQNAPR.[D]	1xBiotin [K4]	4	7	Q9NYF8-1	Q9NYF8-1 [300-312]	Q9NYF8-1 1xBiotin [K303]	Bcl-2-associated transcription factor 1 [OS=Homo sapiens]	1	1576.83	0.235	0.956	0.787	0.227	0.131	145.4	35.6	34	22.3	149.9	212.8	139	140.7	183.5	34.5	37.2	32.7	25.1	32.9	40.7	21	32	21.6	175.9	145.1	133.1	154.4	206	244.4	15319.4	15516.7	20232.7	3800.62	4102.29	3603.56	2767.97	3631.82	4491.61	2313.55	3533.06
[K].SGSLKLR.[I]	1xBiotin [K5]	2	3	O60583	O60583 [502-508]	O60583 1xBiotin [K506]	Cyclin-T2 [OS=Homo sapiens]	1	986.545	0.203	1.25	1.057	0.118	0.121	104.6	21.3	26.6	20	250	177.5	49.6	94.5	147.7	25.5	19.2	11.1	24	17	31.3	18.1	18	61.9	143.9	228.8	225.6	160.2	148.7	374.8	7997.62	15215.9	23795.9	4110.42	3090.97	1787.99	3862.75	2743.8	5040.68	2911.53	2901.09
[K].NAKFYPVTR.[E]	1xBiotin [K3]	1	4	P54851	P54851 [127-135]	P54851 1xBiotin [K129]	Epithelial membrane protein 2 [OS=Homo sapiens]	1	1321.67	0.43	0.843	0.222	0.437	0.117	174.2	74.8	63.1	14	144.4	129.5	294.2	127.8	157	118.9	67.5	65.8	120.7	17.2	56.9	21.5	12.2	12.6	130.1	113.2	143.5	120	116.7	104.3	46528.3	20205.5	24829.7	18808.6	10668.5	10408.4	19082.5	2712.56	8995.72	3393.52	1924.84
[R].HNGTGGKSIYGEK.[F]	1xBiotin [K7]	2	2	P62937	P62937 [70-82]	P62937 1xBiotin [K76]	peptidyl-prolyl cis-trans isomerase A [OS=Homo sapiens]	1	1573.74	0.616	0.236	0.292	0.15	0.116	155.8	96	22.7	4.3	151.5	169.7	4.8	163.6	126.4	96	50.7	77.9	9.6	43.8	18.4	3.5	2.8	386.5	21.6	364	123	24.3	145.5	137.7	3472.78	119069	92021.6	69836.9	36878.7	56717.8	7013.49	31889.5	13389.4	2523.39	2051.32
[K].VAKGQPLCVLSAMKMETVVTSPMEGTVR.[K]	1xBiotin [K14]; 1xCarbamidomethyl [C8]; 3xOxidation [M13; M15; M23]	1	5	P11498	P11498 [1131-1158]	P11498 1xBiotin [K1144]	pyruvate carboxylase, mitochondrial [OS=Homo sapiens]	2	3293.61	1.538	0.542	0.8	0.277	0.108	43.9	54.1	31.2	25	215.2	230.6	34.2	43.1	47.6	170.9	52.7	53.1	30.6	26.9	92.7	24.4	33.7	24.5	97.1	211.1	215	324.1	92.1	226.3	4042.14	5085.6	5618.57	20186.8	6218.09	6270.85	3613.1	3173.01	10948.9	2878.39	3982.03
[K].VAKGQPLCVLSAMKMETVVTSPMEGTVR.[K]	1xBiotin [K14]; 1xCarbamidomethyl [C8]; 2xOxidation [M15; M23]	1	16	P11498	P11498 [1131-1158]	P11498 1xBiotin [K1144]	pyruvate carboxylase, mitochondrial [OS=Homo sapiens]	2	3277.61	2.251	0.978	0.27	1.554	0.082	27	91.8	99.4	25.6	35.7	320.4	14.8	25.8	128.9	33.3	87.6	103.3	23.1	94.8	101	24.5	16.1	27.3	14.8	34.1	239.4	305.6	197.2	328.5	1781.72	3108.6	15548.8	4009.85	10563.3	12454.6	2779.84	11433.3	12179.6	2948.82	1945.16
[K].LLIYDASKLASGVSSR.[F]	1xBiotin [K8]	1	16	AGIA	AGIA [70-85]	AGIA 1xBiotin [K77]	Light	1	1906.01	0.068	0.867	0.847	0.063	0.057	195.1	13.3	11.5	9.1	180.6	190.3	148.4	195.9	221.3	13.4	13.7	12.2	11.6	9.5	14.8	9.1	12.6	8.1	181.3	237.1	168.2	142	209.8	191.1	36553.6	48244.7	54489.9	3288.02	3379.03	2996.9	2849.14	2340.28	3654.08	2250.68	3095.11
[K].ANVGAGKK.[KM-]	1xBiotin [K]	3	22	P62847-4	P62847-4 [123-130]	P62847-4 1xBiotin [K]	Isoform 4 of 40S ribosomal protein S24 [OS=Homo sapiens]	1	970.514	0.059	1.07	1.19	0.048	0.054	154	9.1	9.7	11.6	202.2	213.4	155.6	149.7	159.8	7.5	9.2	14.1	8.4	9.8	10.7	12.4	11.4	11.7	204.3	221.5	174.9	246.1	215.6	177.3	152395	146652	156507	7343.58	9010.89	13828.9	8216.37	9642.35	10478.3	12152.2	11126.8
[K].GQPLCVLSAMKMETVVTSPMEGTVR.[K]	1xBiotin [K11]; 1xCarbamidomethyl [C5]	1	58	P11498	P11498 [1134-1158]	P11498 1xBiotin [K1144]	pyruvate carboxylase, mitochondrial [OS=Homo sapiens]	1	2947.42	1.044	0.643	0.239	0.454	0.036	77.1	80.4	51.7	4.7	114	272.1	5.2	72.5	200.3	16	75.7	131.6	0.6	139.5	48.6	4.4	33.4	0.8	43.6	107.3	271.4	21.8	256	371.1	16379.3	228252	630396	50277.9	238198	414227	1977.98	439097	153083	13996.5	105156
[R].FTISKTSTTVDLR.[I]	1xBiotin [K5]	1	28	AGIA-fabID	AGIA-fabID [85-97]	AGIA-fabID 1xBiotin [K89]	Heavy	1	1694.88	0.009	0.724	1.371	0.006	0.009	190.3	1.7	1.3	1.7	214.8	190.2	257.1	176.6	189.2	1.6	2.5	1.7	1.2	1.2	1.5	1.7	1.3	2.3	235.6	213.6	161.8	198.2	189.2	163.7	388132	266536	285652	2475.36	3786.77	2600.29	1882.75	1820.89	2279.47	2580.33	1918.91
[K].VDKTVAPSTMK.[D]	1xBiotin [K3]	1	35	AGIA-fabID	AGIA-fabID [218-228]	AGIA-fabID 1xBiotin [K220]	Heavy	1	1402.71	0.004	1.076	0.974	0.003	0.003	163.8	0.6	0.7	0.6	178.4	255.8	16.3	172.5	224.5	0.6	0.8	0.6	0.9	0.7	0.5	0.6	0.7	0.7	173.2	280.7	187.8	131.3	338.2	269.3	73595	779908	1.01532e+06	2873.34	3642.4	2897.02	3920.95	3156.6	2207.1	2736.33	3073.46
[K].VDKTVAPSTMK.[D]	1xBiotin [K3]; 1xOxidation [M10]	1	97	AGIA-fabID	AGIA-fabID [218-228]	AGIA-fabID 1xBiotin [K220]	Heavy	1	1418.7	0.001	1.419	0.988	0.002	0.001	201.6	0.3	0.4	0.4	178.7	218.6	130.4	216.8	196.5	0.2	0.3	0.3	0.3	0.4	0.4	0.4	0.4	0.2	145.6	227.3	174.2	292	201.2	213	1.27153e+06	2.11483e+06	1.91642e+06	1943.76	3153.45	2647.04	2852.59	3756.63	4017	3970.46	3811.26
[R].GDAEAVKGIGSGK.[V]	1xBiotin [K7]	3	1	Q99538	Q99538 [119-131]	Q99538 1xBiotin [K125]	Legumain [OS=Homo sapiens]	1	1414.7
[K].GTAEKLKPEDITQIQPQQLVLR.[L]	1xBiotin [K5]	5	1	P05556-1	P05556-1 [101-122]	P05556-1 1xBiotin [K105]	Integrin beta-1 [OS=Homo sapiens]	1	2731.48
[K].GATYGKPVHHGVNQLK.[F]	1xBiotin [K6]	2	1	P61313-1	P61313-1 [78-93]	P61313-1 1xBiotin [K83]	60S ribosomal protein L15 [OS=Homo sapiens]	0	1931.99
[K].GLASLKSEMR.[E]	1xBiotin [K6]	2	2	Q13753-1	Q13753-1 [1045-1054]	Q13753-1 1xBiotin [K1050]	Laminin subunit gamma-2 [OS=Homo sapiens]	1	1317.67
[R].GTKALMDEVVK.[A]	1xBiotin [K3]	2	1	P00558	P00558 [351-361]	P00558 1xBiotin [K353]	phosphoglycerate kinase 1 [OS=Homo sapiens]	1	1416.72
[R].ESYELKVVAADR.[G]	1xBiotin [K6]	2	2	Q08174	Q08174 [576-587]	Q08174 1xBiotin [K581]	Protocadherin-1 [OS=Homo sapiens]	1	1605.79
[R].FNLFKVQQGR.[T]	1xBiotin [K5]	3	1	Q6UN15-1	Q6UN15-1 [231-240]	Q6UN15-1 1xBiotin [K235]	Pre-mRNA 3'-end-processing factor FIP1 [OS=Homo sapiens]	1	1462.76
[K].FAGDKGYLTK.[E]	1xBiotin [K5]	1	2	P60903	P60903 [19-28]	P60903 1xBiotin [K23]	Protein S100-A10 [OS=Homo sapiens]	1	1325.66
[K].KIFVGGLSPDTPEEK.[I]	1xBiotin [K1]	4	2	Q14103	Q14103 [183-197]	Q14103 1xBiotin [K183]	heterogeneous nuclear ribonucleoprotein D0 [OS=Homo sapiens]	1	1842.93
[K].ESKGSPVFLPR.[K]	1xBiotin [K3]	3	4	Q9NYV4-1	Q9NYV4-1 [419-429]	Q9NYV4-1 1xBiotin [K421]	Cyclin-dependent kinase 12 [OS=Homo sapiens]	1	1442.75
[K].ELNGKQIYVGR.[A]	1xBiotin [K5]	3	1	Q9H361	Q9H361 [255-265]	Q9H361 1xBiotin [K259]	Polyadenylate-binding protein 3 [OS=Homo sapiens]	1	1502.78
[K].DISTNYYASQKK.[T]	1xBiotin [K11]	1	1	P14625	P14625 [672-683]	P14625 1xBiotin [K682]	Endoplasmin [OS=Homo sapiens]	1	1643.77
[R].AVNYFSKVK.[Q]	1xBiotin [K7]	2	1	Q00610-1	Q00610-1 [1435-1443]	Q00610-1 1xBiotin [K1441]	Clathrin heavy chain 1 [OS=Homo sapiens]	1	1281.67
[K].ANKITITNDK.[G]	1xBiotin [K3]	3	1	P0DMV8	P0DMV8 [498-507]	P0DMV8 1xBiotin [K500]	heat shock 70 kDa protein 1A [OS=Homo sapiens]	1	1343.7
[K].AIVAGDQNVEYKGTVWHK.[D]	1xBiotin [K12]	5	2	Q13642	Q13642 [107-124]	Q13642 1xBiotin [K118]	Four and a half LIM domains protein 1 [OS=Homo sapiens]	1	2241.11
[R].AKEAQDDLVK.[T]	1xBiotin [K2]	1	1	P15311	P15311 [449-458]	P15311 1xBiotin [K450]	Ezrin [OS=Homo sapiens]	1	1342.67
[R].FQNVAKEGVK.[F]	1xBiotin [K6]	2	1	P14625	P14625 [588-597]	P14625 1xBiotin [K593]	Endoplasmin [OS=Homo sapiens]	1	1345.69
[K].KVEAQLQELQVK.[F]	1xBiotin [K1]	1	1	P35579-1	P35579-1 [1249-1260]	P35579-1 1xBiotin [K1249]	Myosin-9 [OS=Homo sapiens]	1	1638.89
[R].LKGEAEYQEIR.[N]	1xBiotin [K2]	3	3	Q15223	Q15223 [189-199]	Q15223 1xBiotin [K190]	Nectin-1 [OS=Homo sapiens]	1	1561.77
[R].VTGTNKGISPVPINLR.[V]	1xBiotin [K6]	9	2	P50570-1	P50570-1 [108-123]	P50570-1 1xBiotin [K113]	Dynamin-2 [OS=Homo sapiens]	1	1892.04
[K].VAKAYAALAALEK.[L]	1xBiotin [K3]	7	1	Q12906-1	Q12906-1 [575-587]	Q12906-1 1xBiotin [K577]	Interleukin enhancer-binding factor 3 [OS=Homo sapiens]	1	1544.85
[R].TLLAKNLPYK.[V]	1xBiotin [K5]	1	2	P19338	P19338 [394-403]	P19338 1xBiotin [K398]	Nucleolin [OS=Homo sapiens]	1	1386.78
[K].TGGDNKTLLHLGSSAPGK.[E]	1xBiotin [K6]	3	1	Q5SW79-1	Q5SW79-1 [712-729]	Q5SW79-1 1xBiotin [K717]	Centrosomal protein of 170 kDa [OS=Homo sapiens]	1	1979
[K].TANQASDTFSGIGKK.[F]	1xBiotin [K14]	1	1	Q15847	Q15847 [57-71]	Q15847 1xBiotin [K70]	Adipogenesis regulatory factor [OS=Homo sapiens]	1	1750.84
[R].TANPSKTIDLGAAAHYTGDK.[A]	1xBiotin [K6]	3	2	Q14677-1	Q14677-1 [278-297]	Q14677-1 1xBiotin [K283]	Clathrin interactor 1 [OS=Homo sapiens]	1	2257.09
[R].TAAENEFVTLKK.[D]	1xBiotin [K11]	4	1	P04259; P02538	P04259 [261-272]; P02538 [261-272]	P04259 1xBiotin [K271]; P02538 1xBiotin [K271]	keratin, type II cytoskeletal 6B [OS=Homo sapiens] Keratin, type II cytoskeletal 6A [OS=Homo sapiens]	1	1576.8
[R].SSGPYGGGGQYFAKPR.[N]	1xBiotin [K14]	3	2	P09651-1	P09651-1 [337-352]	P09651-1 1xBiotin [K350]	Heterogeneous nuclear ribonucleoprotein A1 [OS=Homo sapiens]	0	1854.86
[R].SPALKSPLQSVVVR.[R]	1xBiotin [K5]	1	3	Q9Y2W1	Q9Y2W1 [248-261]	Q9Y2W1 1xBiotin [K252]	Thyroid hormone receptor-associated protein 3 [OS=Homo sapiens]	1	1706.96
[R].QTVAVGVIKAVDK.[K]	1xBiotin [K9]	3	3	P68104	P68104 [431-443]	P68104 1xBiotin [K439]	Elongation factor 1-alpha 1 [OS=Homo sapiens]	1	1553.87
[K].QKGADFLVTEVENGGSLGSK.[K]	1xBiotin [K2]	3	1	P14618	P14618 [187-206]	P14618 1xBiotin [K188]	Pyruvate kinase PKM [OS=Homo sapiens]	1	2262.11
[R].QATKDAGVIAGLNVLR.[I]	1xBiotin [K4]	3	1	P0DMV8	P0DMV8 [156-171]	P0DMV8 1xBiotin [K159]	heat shock 70 kDa protein 1A [OS=Homo sapiens]	1	1852.01
[K].NLYIISVKGIK.[G]	1xBiotin [K8]	1	2	P62829	P62829 [36-46]	P62829 1xBiotin [K43]	60S ribosomal protein L23 [OS=Homo sapiens]	1	1473.85
[-].MSLKLQASNVTNK.[N]	1xBiotin [K4]; 1xMet-loss+Acetyl [N-Term]	2	1	Q9UKM9-1	Q9UKM9-1 [1-13]	Q9UKM9-1 1xBiotin [K4]; 1xMet-loss+Acetyl [N-Term]	RNA-binding protein Raly [OS=Homo sapiens]	1	1570.83
[R].VIKDFMIQGGDFTR.[G]	1xBiotin [K3]	1	1	P23284	P23284 [96-109]	P23284 1xBiotin [K98]	peptidyl-prolyl cis-trans isomerase B [OS=Homo sapiens]	1	1852.91
[R].MQKEITALAPSTMK.[I]	1xBiotin [K3]; 1xOxidation [M]	7	2	P60709	P60709 [313-326]	P60709 1xBiotin [K315]	Actin, cytoplasmic 1 [OS=Homo sapiens]	1	1790.88
[-].MKFNPFVTSDR.[S]	1xBiotin [K2]; 1xOxidation [M1]	2	1	P61254	P61254 [1-11]	P61254 1xBiotin [K2]	60S ribosomal protein L26 [OS=Homo sapiens]	1	1583.73
[-].MENLQTNFSLVQGSTK.[K]	1xBiotin [K16]	4	1	P12757	P12757 [1-16]	P12757 1xBiotin [K16]	Ski-like protein [OS=Homo sapiens]	0	2022.96
[-].MAAYKLVLIR.[H]	1xBiotin [K5]; 1xMet-loss+Acetyl [N-Term]	2	1	Q8N0Y7	Q8N0Y7 [1-10]	Q8N0Y7 1xBiotin [K5]; 1xMet-loss+Acetyl [N-Term]	Probable phosphoglycerate mutase 4 [OS=Homo sapiens]	1	1314.76
[K].IVNLGSSKTDLFYER.[K]	1xBiotin [K8]	1	4	Q7RTV0	Q7RTV0 [88-102]	Q7RTV0 1xBiotin [K95]	PHD finger-like domain-containing protein 5A [OS=Homo sapiens]	1	1967.99
[K].LVLVGDGGTGKTTFVK.[R]	1xBiotin [K11]	1	3	P62826	P62826 [13-28]	P62826 1xBiotin [K23]	GTP-binding nuclear protein RAN [OS=Homo sapiens]	1	1817.98
[R].IPKEQGVLSFWR.[G]	1xBiotin [K3]	2	1	P12236	P12236 [61-72]	P12236 1xBiotin [K63]	ADP/ATP translocase 3 [OS=Homo sapiens]	1	1685.88
[R].IIALDGDTKNSTFSEIFK.[K]	1xBiotin [K9]	2	3	P29401	P29401 [335-352]	P29401 1xBiotin [K343]	Transketolase [OS=Homo sapiens]	1	2225.12
[K].VDKSAVGFEYQGK.[T]	1xBiotin [K3]	3	2	Q14247-1	Q14247-1 [206-218]	Q14247-1 1xBiotin [K208]	Src substrate cortactin [OS=Homo sapiens]	1	1653.79
[R].LHPELSGPGVAAKVLAASVR.[R]	1xBiotin [K13]	1	1	Q6DD87	Q6DD87 [199-218]	Q6DD87 1xBiotin [K211]	Zinc finger protein 787 [OS=Homo sapiens]	1	2198.21
[R].IDFSKLTSLNVK.[Y]	1xBiotin [K5]	10	1	P26599	P26599 [255-266]	P26599 1xBiotin [K259]	Polypyrimidine tract-binding protein 1 [OS=Homo sapiens]	1	1590.86
[R].LAKLSDGVAVLK.[V]	1xBiotin [K3]	1	1	P10809	P10809 [394-405]	P10809 1xBiotin [K396]	60 kDa heat shock protein, mitochondrial [OS=Homo sapiens]	1	1439.83
[K].LKLSILYPATTGR.[N]	1xBiotin [K2]	1	1	P30041	P30041 [143-155]	P30041 1xBiotin [K144]	Peroxiredoxin-6 [OS=Homo sapiens]	1	1658.93
[truncated: 49 more columns]

## Sheet: EGFR-DM AGIA-DM
Annotated Sequence	Modifications	# Proteins	# PSMs	Master Protein Accessions	Positions in Master Proteins	Modifications in Master Proteins	Master Protein Descriptions	# Missed Cleavages	Theo. MH+ [Da]	Abundances (Normalized): F5: Sample, 1 A431-AGIA-FabID DMSO n=1	Abundances (Normalized): F15: Sample, 1 A431-AGIA-FabID DMSO n=2	Abundances (Normalized): F21: Sample, 1 A431-AGIA-FabID DMSO n=3	Abundances (Normalized): F8: Sample, 10 A431-EGFR-FabID DMSO n=1	Abundances (Normalized): F18: Sample, 10 A431-EGFR-FabID DMSO n=2	Abundances (Normalized): F24: Sample, 10 A431-EGFR-FabID DMSO n=3	Abundances (Normalized): F9: Sample, 13 A431-EGFR-FabID DMSO EGF n=1	Abundances (Normalized): F19: Sample, 13 A431-EGFR-FabID DMSO EGF n=2	Abundances (Normalized): F25: Sample, 13 A431-EGFR-FabID DMSO EGF n=3	Abundances (Normalized): F10: Sample, 16 A431-EGFR-FabID Gefitinib EGF n=1	Abundances (Normalized): F20: Sample, 16 A431-EGFR-FabID Gefitinib EGF n=2	Abundances (Normalized): F26: Sample, 16 A431-EGFR-FabID Gefitinib EGF n=3	Abundances (Normalized): F6: Sample, 4 A431-AGIA-FabID DMSO EGF n=1	Abundances (Normalized): F16: Sample, 4 A431-AGIA-FabID DMSO EGF n=2	Abundances (Normalized): F22: Sample, 4 A431-AGIA-FabID DMSO EGF n=3	Abundances (Normalized): F7: Sample, 7 A431-AGIA-FabID Gefitinib EGF n=1	Abundances (Normalized): F17: Sample, 7 A431-AGIA-FabID Gefitinib EGF n=2	Abundances (Normalized): F23: Sample, 7 A431-AGIA-FabID Gefitinib EGF n=3	TMHMM (TM helix)	TMHMM (in/out)	UniProt (Location)	Gene symbol	Ratio(EGFR-FabID/AGIA-FabID)	Ratio(Log2)	pValue	− p Value (LOG10)	p Value Rank	q value	q value (-log10)
[K].ANVGAGKK.[KM-]	1xBiotin [K]	3	22	P62847-4	P62847-4 [123-130]	P62847-4 1xBiotin [K]	Isoform 4 of 40S ribosomal protein S24 [OS=Homo sapiens]	1	970.514	152395	146652	156507	7343.58	9010.89	13828.9	8216.37	9642.35	10478.3	12152.2	11126.8	11477.5	200148	216993	171299	241101	211257	173715	NoTM	outside	NO_DATA	RPS24	0.0662565	-3.91579	2.11077e-06	5.67556	1	0.00101528	2.99341
[R].QQIMQLKIMTNR.[L]	1xBiotin [K7]; 1xOxidation [M]	1	24	P35052	P35052 [455-466]	P35052 1xBiotin [K461]	Glypican-1 [OS=Homo sapiens]	1	1745.89	2918.19	3822.98	2676	67609.8	70449.6	64598.2	77315	63120.7	96043.9	66335.4	99970.2	55777.4	3121.29	3394.66	3778.26	2007.16	4075.28	3457.19	NoTM	outside	Cell membrane;Lipid-anchor, GPI-anchor;Extracellular side;Endosome;Localizes to CAV1-containing vesicles close to the cell surface;Cleavage of heparan sulfate side chains takes place mainly in late endosomes;Associates with both forms of PRNP in lipid rafts;Colocalizes with APP in perinuclear compartments and with CP in intracellular compartments;Associates with fibrillar APP amyloid-beta peptide…	GPC1	21.52	4.42761	3.07183e-06	5.5126	2	0.000738775	3.13149
[K].AGAVEKGVPLYR.[H]	1xBiotin [K6]	2	8	P06733-1	P06733-1 [121-132]	P06733-1 1xBiotin [K126]	alpha-enolase [OS=Homo sapiens]	1	1485.79	1778.42	2252.67	2365.19	15468.4	15171.9	16851.4	14645.7	15582	17041.3	10150.9	13081.5	15651.6	1806.34	4392.6	2243.75	3170.12	2751.22	3221.09	NoTM	outside	Cytoplasm;Cell membrane;Cytoplasm, myofibril, sarcomere, M line;ENO1 is localized to the M line;[Isoform MBP-1]: Nucleus;[Isoform MBP-1]: Nucleus	ENO1	7.42488	2.89237	1.51917e-05	4.81839	3	0.00243574	2.61337
[K].QHTVTTTTKGENFTETDVK.[M]	1xBiotin [K9]	2	10	P04156-1	P04156-1 [186-204]	P04156-1 1xBiotin [K194]	Major prion protein [OS=Homo sapiens]	1	2363.12	2031.36	3103.45	2925.57	45458.3	50228.7	51669.1	57001	61459.1	63275.5	42134.8	61144.5	54848.9	3502.01	2453.29	2988.12	2094.74	1974.7	2101.8	HasTM	inside	Cell membrane;Lipid-anchor, GPI-anchor;Golgi apparatus;Colocates, in the presence of Cu(2+), to vesicles in para- and perinuclear regions, where both proteins undergo internalization;Heparin displaces PRNP from lipid rafts and promotes endocytosis	PRNP	18.2815	4.19232	1.6844e-05	4.77356	4	0.00202549	2.69347
[K].SYGKNIDSK.[L]	1xBiotin [K4]	1	5	O15031	O15031 [744-752]	O15031 1xBiotin [K747]	Plexin-B2 [OS=Homo sapiens]	1	1237.59	3566.36	1972.27	3226.65	23887.4	21497	23743.8	24176	24795.3	29778.8	26256.8	20031.3	26916.2	1920.9	5015.93	3866.94	2354.68	4100.13	3395.33	NoTM	outside	Cell membrane	PLXNB2	7.88659	2.9794	2.51192e-05	4.59999	5	0.00241647	2.61682
[K].VKLIVLVPPSKPTVNIPSSATIGNR.[A]	1xBiotin [K2]	1	8	Q9Y624	Q9Y624 [124-148]	Q9Y624 1xBiotin [K125]	Junctional adhesion molecule A [OS=Homo sapiens]	1	2826.63	2264.64	2739.37	3218.85	22749.7	21161.9	24202.1	3413.43	23308.3	13471.9	8343.2	12364.9	2695.87	2415.73	8118.58	3199.14	3189.72	2231.96	4135.94	HasTM	outside	Cell junction, tight junction;Cell membrane	F11R	8.28346	3.05023	2.66971e-05	4.57354	6	0.00214022	2.66954
[-].MSILKIHAR.[E]	1xBiotin [K5]; 1xMet-loss+Acetyl [N-Term]	1	7	P06733-1	P06733-1 [1-9]	P06733-1 1xBiotin [K5]; 1xMet-loss+Acetyl [N-Term]	alpha-enolase [OS=Homo sapiens]	1	1205.68	11493.8	14521.1	14198.3	51959.1	56465.3	50036.2	57640.5	47294.5	49670.1	41076.7	43005.7	41690.6	12439.2	14622.3	13127	8730.89	8370.97	12060	NoTM	outside	Cytoplasm;Cell membrane;Cytoplasm, myofibril, sarcomere, M line;ENO1 is localized to the M line;[Isoform MBP-1]: Nucleus;[Isoform MBP-1]: Nucleus	ENO1	3.94051	1.97838	5.04972e-05	4.29673	7	0.00346988	2.45969
[R].SLKSFVVTSVVAFPTDSK.[T]	1xBiotin [K3]	1	20	Q9Y5Y6	Q9Y5Y6 [187-204]	Q9Y5Y6 1xBiotin [K189]	suppressor of tumorigenicity 14 protein [OS=Homo sapiens]	1	2138.12	3262.6	3068.15	2450.27	76374.4	70959.8	85093	4127.47	93837.9	43531.8	25946.3	51647.6	24680.6	3549.59	2600.25	2851.54	1749.56	3182.47	4037.36	HasTM	outside	Membrane	ST14	26.4693	4.72625	5.50726e-05	4.25906	8	0.00331124	2.48001
[K].IFQKGESPVDYDGGR.[T]	1xBiotin [K4]	5	17	Q15084-1	Q15084-1 [242-256]	Q15084-1 1xBiotin [K245]	Protein disulfide-isomerase A6 [OS=Homo sapiens]	1	1893.88	60627.6	59649.7	57764.1	13247.2	21476.8	16438	15167	8679.74	20067.6	20201.8	23400.2	12771.5	69133.3	46427.3	66234.1	76740.9	71842.9	75519.2	NoTM	outside	Endoplasmic reticulum lumen;Cell membrane;Melanosome	PDIA6	0.28736	-1.79907	7.6059e-05	4.11885	9	0.00406493	2.39095
[K].KGLTPSQIGVILR.[D]	1xBiotin [K1]	1	10	P62277	P62277 [43-55]	P62277 1xBiotin [K43]	40S ribosomal protein S13 [OS=Homo sapiens]	1	1607.93	10123.3	11055.9	11731.2	2412.2	2836.35	3102.51	2381.39	4871.34	4211.42	2544.04	7310.31	3278.48	13067	14929.1	13859.4	16109.2	16219.1	12401.4	NoTM	outside	NO_DATA	RPS13	0.253752	-1.97851	8.64823e-05	4.06307	10	0.0041598	2.38093
[K].ITSDYQATQKITYR.[I]	1xBiotin [K10]	1	20	P32926	P32926 [73-86]	P32926 1xBiotin [K82]	Desmoglein-3 [OS=Homo sapiens]	1	1913.94	3435.9	2644.81	3943.52	49533.5	40245.2	47325.3	42171.5	30665	31657.4	122389	111419	122441	7630.08	3989.62	4330.14	1855.27	4137.73	2153.19	NoTM	outside	Cell membrane;Cell junction, desmosome	DSG3	13.6773	3.77371	0.00011556	3.93719	11	0.00505311	2.29644
[R].KGLDFEAK.[N]	1xBiotin [K1]	2	3	P22223-1	P22223-1 [394-401]	P22223-1 1xBiotin [K394]	Cadherin-3 [OS=Homo sapiens]	1	1133.57	2183.88	3543	1989.28	14321.4	16977.5	16909.9	20749.7	17867.9	20784.2	22507.5	18342.6	17123.2	1714.42	4010.53	2407.36	3818.33	2299.47	3926.45	HasTM	outside	Cell membrane;Single-pass type I membrane protein	CDH3	6.24777	2.64334	0.000175454	3.75584	12	0.00703279	2.15287
[K].LFGTSGQKTK.[I]	1xBiotin [K]	3	60	P00533-1	P00533-1 [480-489]	P00533-1 1xBiotin [K]	epidermal growth factor receptor [OS=Homo sapiens]	1	1292.67	112285	122709	120000	1.33684e+06	1.378e+06	1.6787e+06	2.19032e+06	1.75867e+06	1.75691e+06	2.53075e+06	1.90103e+06	2.679e+06	160959	123764	102236	54818.7	53471.2	46341.6	HasTM	outside	Cell membrane;Endoplasmic reticulum membrane ;Single-pass type I membrane protein;Golgi apparatus membrane;Single-pass type I membrane protein;Nucleus membrane;Single-pass type I membrane protein;Endosome;Endosome membrane;Nucleus;Endocytosed upon activation by ligand (PubMed:2790960, PubMed:17182860, PubMed:27153536);Colocalized with GPER1 in the nucleus of estrogen agonist-induced cancer-associ…	EGFR	12.3764	3.62952	0.000236499	3.62617	13	0.00875047	2.05797
[K].FASFIDKVR.[F]	1xBiotin [K7]	21	9	P35908; P04259; P02538; P05787; P13647	P35908 [189-197]; P04259 [174-182]; P02538 [174-182]; P05787 [102-110]; P13647 [179-187]	P35908 1xBiotin [K195]; P04259 1xBiotin [K180]; P02538 1xBiotin [K180]; P05787 1xBiotin [K108]; P13647 1xBiotin [K185]	Keratin, type II cytoskeletal 2 epidermal [OS=Homo sapiens] keratin, type II cytoskeletal 6B [OS=Homo sapiens] Keratin, type II cytoskeletal 6A [OS=Homo sapiens] Keratin, type II cytoskeletal 8 [OS=Homo sapiens] keratin, type II cytoskeletal 5 [OS=Homo sapiens]	1	1308.68	3470.94	3524.83	4782.82	16796.3	17884.1	14739.4	9990.66	13217.5	14963.1	9471.08	12636.4	6642.36	3490.54	8241.22	6876.58	4164.8	3052.72	3459.73	NoTM	outside	NO_DATA	KRT2	4.19573	2.06892	0.000247822	3.60586	14	0.00851446	2.06984
[R].EKGPDPLQYMR.[A]	1xBiotin [K2]; 1xOxidation [M10]	3	2	P02458-1	P02458-1 [1161-1171]	P02458-1 1xBiotin [K1162]	Isoform 1 of Collagen alpha-1(II) chain [OS=Homo sapiens]	1	1575.73	15408.2	15763.2	13030.4	2706.54	2119.86	3719.89	1727.47	3854.53	3033.91	2221.6	3160.73	3510.13	17789.2	15477.5	13176	25742.7	15419.7	13760.8	NoTM	outside	Secreted, extracellular space, extracellular matrix	COL2A1	0.193347	-2.37073	0.000261989	3.58172	15	0.00840111	2.07566
[-].MKIEEVK.[S]	1xBiotin [K2]; 1xOxidation [M1]	2	2	Q9Y265	Q9Y265 [1-7]	Q9Y265 1xBiotin [K2]	RuvB-like 1 [OS=Homo sapiens]	1	1118.56	8704.18	9107.13	9857.8	13486.7	13339.1	13184.1	21602	12462.7	12986.6	19002.8	17409.9	18094	10521	11527.3	6968.02	2812.51	7402.49	8591.25	NoTM	outside	Nucleus matrix;Nucleus, nucleoplasm;Cytoplasm;Membrane;Cytoplasm, cytoskeleton, microtubule organizing center, centrosome;In prophase and prometaphase it is located at the centrosome and the branching microtubule spindles;After mitotic nuclear membrane disintigration it accumulates at the centrosome and sites of tubulin polymerization;As cells pass through metaphase and into telophase it is locat…	RUVBL1	1.44602	0.532083	0.00029693	3.52735	16	0.00892647	2.04932
[R].KGNYAER.[VI]	1xBiotin [K1]	10	9	Q16777	Q16777 [37-43]	Q16777 1xBiotin [K37]	Histone H2A type 2-C [OS=Homo sapiens]	1	1063.5	14222	16354.9	14145.6	46150.5	47380	56511.1	51690.7	51515.9	62452.2	44537.5	43833.2	42397.2	20944.4	18332.2	10495.6	17959.5	16273	10152.4	NoTM	outside	Nucleus;Chromosome	HIST2H2AC	3.35494	1.74629	0.000467167	3.33053	17	0.0132181	1.87883
[R].YYKNIGLGFK.[T]	1xBiotin [K3]	1	7	P62280	P62280 [36-45]	P62280 1xBiotin [K38]	40S ribosomal protein S11 [OS=Homo sapiens]	1	1428.73	13800.4	15255.9	11960.6	3817.47	2812.7	2772.35	1883.58	3650.45	2978.23	3548.35	2637.54	3501.03	13363.5	11258.6	10427.1	15422.5	20363.1	14861.8	NoTM	outside	NO_DATA	RPS11	0.229235	-2.1251	0.000481971	3.31698	18	0.0128793	1.89011
[K].ANPFGGASHAKGIVLEK.[V]	1xBiotin [K11]	1	24	P62266	P62266 [38-54]	P62266 1xBiotin [K48]	40S ribosomal protein S23 [OS=Homo sapiens]	1	1922	81475	99550.4	101094	8530.99	17199.2	23584.5	10026.2	16862.4	13577.1	19526.2	20205.2	16670	114821	110164	112733	109362	111513	103020	NoTM	outside	Cytoplasm, cytosol;Cytoplasm;Rough endoplasmic reticulum;Detected in ribosomes that are associated with the rough endoplasmic reticulum (By similarity)	RPS23	0.174801	-2.51622	0.000534783	3.27182	19	0.0135384	1.86843
[K].EDAMKTK.[T]	1xBiotin [K5]; 1xOxidation [M4]	3	12	Q29983	Q29983 [171-177]	Q29983 1xBiotin [K175]	MHC class I polypeptide-related sequence A [OS=Homo sapiens]	1	1064.48	2324.42	2092.82	3309.34	34847.6	42644.1	48749.6	31691.4	55133.1	59118.4	37326.2	48752.2	34601	3255.7	2767.3	1909.1	2965.17	3493.01	3890.69	HasTM	outside	Cell membrane;Cytoplasm;Infection with human adenovirus 5 suppresses cell surface expression due to the adenoviral E3-19K protein which causes retention in the endoplasmic reticulum	MICA	16.3386	4.03021	0.000613065	3.21249	20	0.0147442	1.83138
[R].KPIDYTVLDDVGHGVK.[WH]	1xBiotin [K1]	11	9	Q8IZP0	Q8IZP0 [139-154]	Q8IZP0 1xBiotin [K139]	abl interactor 1 [OS=Homo sapiens]	0	1982.01	16650	16491.2	19919.7	4082.12	6337.66	5219.22	3200.32	4112.39	3702.32	6429.62	3898.93	3883.25	20153	24529.2	15529.6	15056.3	24789	18588.1	NoTM	outside	Cytoplasm;Nucleus;Cell projection, lamellipodium;Cell projection, filopodium;Cell projection, growth cone;Cell junction, synapse, postsynaptic density;Cytoplasm, cytoskeleton;Also localized to neuronal growth cones and synaptosomes;May shuttle from the postsynaptic densities to the nucleus (By similarity)	ABI1	0.294737	-1.7625	0.000646116	3.18969	21	0.0147991	1.82976
[K].GTLVQTKGTGASGSFK.[L]	1xBiotin [K7]	5	8	P16401; P10412	P16401 [94-109]; P10412 [91-106]	P16401 1xBiotin [K100]; P10412 1xBiotin [K97]	Histone H1.5 [OS=Homo sapiens] Histone H1.4 [OS=Homo sapiens]	1	1764.89	2619.16	7804.68	6147.61	22630.2	25072.4	27229.1	28519.2	24778.5	21907.8	2023.62	17647.3	2377.82	7864.33	7951.08	3362.15	2123.54	3800.82	3835.39	NoTM	outside	Nucleus;Chromosome;According to PubMed:10997781 associates with actively transcribed chromatin and not heterochromatin	HIST1H1B	4.52173	2.17688	0.000657023	3.18242	22	0.0143649	1.8427
[R].KTVTAMDVVYALK.[R]	1xBiotin [K1]; 1xOxidation [M6]	1	12	P62805	P62805 [80-92]	P62805 1xBiotin [K80]	histone H4 [OS=Homo sapiens]	1	1680.87	3183.24	2692.8	4111.16	17615.9	18645.1	13926.1	13714.9	13048	22984	20129.8	21830.1	19326.9	3781.35	2728.82	1884.45	2745.16	2687.09	2230.56	NoTM	outside	Nucleus;Chromosome	HIST4H4	5.02514	2.32916	0.000850122	3.07052	23	0.0177786	1.7501
[R].LAHYNKR.[S]	1xBiotin [K6]	16	10	Q16778; O60814	Q16778 [81-87]; O60814 [81-87]	Q16778 1xBiotin [K86]; O60814 1xBiotin [K86]	Histone H2B type 2-E [OS=Homo sapiens] Histone H2B type 1-K [OS=Homo sapiens]	1	1127.58	2588.15	5524.54	7221.99	33550.3	44445	45317	47529.8	43815	46313.9	40524.4	31611.9	43599.5	8077.87	6143.16	4356.78	6013.25	5296.32	5341.32	NoTM	outside	Nucleus;Chromosome	HIST2H2BE	8.0414	3.00745	0.000860845	3.06508	24	0.0172528	1.76314
[R].IAKAVNEK.[S]	1xBiotin [K3]	2	5	P06733-1	P06733-1 [328-335]	P06733-1 1xBiotin [K330]	alpha-enolase [OS=Homo sapiens]	1	1098.6	2899.1	3295.36	2453.72	9739.24	12936.7	11767.5	12886.5	11971.3	13452	8661.27	9200.71	8072.77	2584.34	2833	3590.78	3794.84	4163.61	3100.62	NoTM	outside	Cytoplasm;Cell membrane;Cytoplasm, myofibril, sarcomere, M line;ENO1 is localized to the M line;[Isoform MBP-1]: Nucleus;[Isoform MBP-1]: Nucleus	ENO1	3.98273	1.99376	0.00087759	3.05671	25	0.0168848	1.7725
[K].NKAEFHQSVISR.[Y]	1xBiotin [K2]	1	2	P32926	P32926 [351-362]	P32926 1xBiotin [K352]	Desmoglein-3 [OS=Homo sapiens]	1	1641.82	3843.93	2441.02	2784.72	12292.9	9647.09	10464.9	13084.5	9618.99	10287.6	14204.6	15454.1	16925.8	3344.72	3644.08	2098.62	2823.6	2479.67	2121.32	NoTM	outside	Cell membrane;Cell junction, desmosome	DSG3	3.57289	1.83709	0.000939499	3.0271	26	0.0173807	1.75993
[K].HSSQTSNLAHKTYSLSSSFSSSSSTR.[K]	1xBiotin [K11]	1	1	O60563	O60563 [547-572]	O60563 1xBiotin [K557]	Cyclin-T1 [OS=Homo sapiens]	1	3000.38	2180.59	1928.45	2087.15	3420.4	3577.82	3114.63	3147.64	1839.14	2224.63	2019.89	2476.15	3779.23	1877.13	2057.38	6835.37	2599.61	4102.52	3194.95	NoTM	outside	Nucleus	CCNT1	1.63211	0.706736	0.00107752	2.96758	27	0.0191958	1.71679
[R].SRPVINIQKTITVTPNR.[I]	1xBiotin [K9]	8	10	P23229-1	P23229-1 [503-519]	P23229-1 1xBiotin [K511]	integrin alpha-6 [OS=Homo sapiens]	1	2163.21	3731.23	2319.75	3873.86	8069.55	9193.27	8155.95	7601.2	6651.62	8030.42	33482.1	34752.8	44707	1734.74	3457.13	2942.45	4009.55	2499.08	2999.39	HasTM	outside	Cell membrane;Cell membrane	ITGA6	2.56113	1.35678	0.00108984	2.96264	28	0.0187219	1.72765
[R].KFGDPVVQSDMK.[H]	1xBiotin [K1]; 1xOxidation [M11]	2	10	P0DMV8	P0DMV8 [77-88]	P0DMV8 1xBiotin [K77]	heat shock 70 kDa protein 1A [OS=Homo sapiens]	1	1592.74	2471.85	3648.41	2739.44	22023	18806.8	15559.2	33959	15970.3	23104	28384.5	18486.6	25969	1821.72	3660.37	2565.35	2195.22	2274.32	1754.43	NoTM	outside	Cytoplasm;Nucleus;Cytoplasm, cytoskeleton, microtubule organizing center, centrosome	HSPA1A	6.36467	2.67009	0.00112959	2.94708	29	0.0187357	1.72733
[R].SPAKTIAPQNAPR.[D]	1xBiotin [K4]	4	7	Q9NYF8-1	Q9NYF8-1 [300-312]	Q9NYF8-1 1xBiotin [K303]	Bcl-2-associated transcription factor 1 [OS=Homo sapiens]	1	1576.83	15319.4	15516.7	20232.7	3800.62	4102.29	3603.56	2767.97	3631.82	4491.61	2313.55	3533.06	2380.18	19392.7	15997.3	14673.6	17027	22706.5	26946.4	NoTM	outside	Cytoplasm;Nucleus;Nucleus speckle;Nucleus, nucleoplasm	BCLAF1	0.225313	-2.15	0.00121715	2.91466	30	0.019515	1.70963
[R].ILDPTKLGPR.[M]	1xBiotin [K6]	5	23	Q13308-1	Q13308-1 [631-640]	Q13308-1 1xBiotin [K636]	Inactive tyrosine-protein kinase 7 [OS=Homo sapiens]	1	1335.75	13288.4	15152.1	14650	459792	605839	705519	579827	500720	604747	652013	700692	671515	13207.6	13743.7	11301.3	2768.94	4523.97	5720.17	HasTM	outside	Membrane;Cell junction;Also localizes at the leading edge of migrating cells	PTK7	41.103	5.36117	0.00127931	2.89303	31	0.0198499	1.70224
[R].KFSLFAER.[K]	1xBiotin [K1]	8	10	P23229-1	P23229-1 [953-960]	P23229-1 1xBiotin [K953]	integrin alpha-6 [OS=Homo sapiens]	1	1223.62	2374.83	9802.44	10559.3	30500.8	37703.3	33488.7	32227.9	40080	38816	37469.6	38444.8	27841.1	8364.65	13345.9	8216.08	3216.11	3557.11	4647.37	HasTM	outside	Cell membrane;Cell membrane	ITGA6	4.47266	2.16113	0.00140883	2.85114	32	0.0211764	1.67415
[R].NNELIAVGKGSSLK.[R]	1xBiotin [K9]	1	22	O00622	O00622 [195-208]	O00622 1xBiotin [K203]	Protein CYR61 [OS=Homo sapiens]	1	1655.88	2371.04	8588.65	10015.1	37658.3	45597.5	52427.3	83082.6	67206.6	82070.9	34485.7	30664.5	34709.4	16315.7	9555.45	8736.33	9802.65	9426.55	6564.45	NoTM	outside	Secreted	CCN1	6.46886	2.69351	0.00142184	2.84715	33	0.0207244	1.68352
[R].SLKEISDGDVIISGNK.[N]	1xBiotin [K3]	3	5	P00533-1	P00533-1 [452-467]	P00533-1 1xBiotin [K454]	epidermal growth factor receptor [OS=Homo sapiens]	1	1900.97	3854.14	3012.24	3755.73	6964.59	6700.31	6017.94	7616.81	7996.51	6053.91	6303.85	9225.45	3304.66	2862.72	5561.25	1856.18	1867.12	3979.46	3718.9	HasTM	outside	Cell membrane;Endoplasmic reticulum membrane ;Single-pass type I membrane protein;Golgi apparatus membrane;Single-pass type I membrane protein;Nucleus membrane;Single-pass type I membrane protein;Endosome;Endosome membrane;Nucleus;Endocytosed upon activation by ligand (PubMed:2790960, PubMed:17182860, PubMed:27153536);Colocalized with GPER1 in the nucleus of estrogen agonist-induced cancer-associ…	EGFR	1.85301	0.889867	0.00146174	2.83513	34	0.0206793	1.68446
[K].NYGKTILTK.[E]	1xBiotin [K4]	2	5	P78536-1	P78536-1 [389-397]	P78536-1 1xBiotin [K392]	Disintegrin and metalloproteinase domain-containing protein 17 [OS=Homo sapiens]	1	1263.68	3717.42	4154.2	4709.29	11629.8	13231.8	15634.1	13225.5	11725.3	14255.8	35024.2	37044.9	35865.6	1714.86	2970.75	2535.15	2755.01	3803.22	2693.4	HasTM	outside	Membrane;Single-pass type I membrane protein	ADAM17	3.21882	1.68653	0.00148343	2.82873	35	0.0203866	1.69066
[K].KEMQPTHPIR.[L]	1xBiotin [K1]; 1xOxidation [M3]	5	2	P63104-1	P63104-1 [158-167]	P63104-1 1xBiotin [K158]	14-3-3 protein zeta/delta [OS=Homo sapiens]	1	1478.72	2624.57	2509.21	1913.02	6708.82	5539.03	7343.38	12386.8	6563.98	9867.45	7899.39	5195.47	2391.8	2493.71	2607.32	1876.54	3517.84	2301.89	2405.85	NoTM	outside	Cytoplasm;Melanosome	YWHAZ	2.78016	1.47517	0.00186995	2.72817	36	0.0249846	1.60233
[R].LAYIAHPKLGK.[R]	1xBiotin [K8]	1	1	P47914	P47914 [96-106]	P47914 1xBiotin [K103]	60S ribosomal protein L29 [OS=Homo sapiens]	1	1436.81	21170.5	18199	15922.3	6755.92	6947.04	8180.46	6090.24	6536.8	6732.19	6508.36	5596.34	5669.33	17887.5	20132.8	14455.8	17545.7	18405.3	16887.9	NoTM	inside	NO_DATA	RPL29	0.395781	-1.33723	0.00215521	2.66651	37	0.0280178	1.55257
[K].AATALKDVVK.[V]	1xBiotin [K6]	5	13	Q15084-1	Q15084-1 [68-77]	Q15084-1 1xBiotin [K73]	Protein disulfide-isomerase A6 [OS=Homo sapiens]	1	1241.69	18161.2	16788.6	14835.8	7452.96	9540.23	8820.2	13021.6	9066.45	8627.65	8675.53	8702.6	10073.7	17025.4	21045.1	10864.2	14668.6	16417.5	15759.2	NoTM	outside	Endoplasmic reticulum lumen;Cell membrane;Melanosome	PDIA6	0.518491	-0.947608	0.00219984	2.65761	38	0.0278453	1.55525
[K].GEYVGKVFR.[V]	1xBiotin [K6]	2	7	P33151	P33151 [86-94]	P33151 1xBiotin [K91]	Cadherin-5 [OS=Homo sapiens]	1	1280.65	3555.87	2623.95	2751.69	13422.2	16486.8	20133.5	24222.3	18377	18396.7	27415.1	21287.8	27317.1	2543.55	2858.81	2771.6	3696.24	3883.73	2860.11	HasTM	outside	Cell junction;Cell membrane;KRIT1 and CDH5 reciprocally regulate their localization to endothelial cell-cell junctions	CDH5	5.60292	2.48618	0.0022088	2.65584	39	0.0272418	1.56476
[K].KALAAAGYDVEK.[N]	1xBiotin [K1]	5	10	P10412	P10412 [64-75]	P10412 1xBiotin [K64]	Histone H1.4 [OS=Homo sapiens]	1	1461.74	3091.84	5745.22	5736.26	13691.5	18140.9	17863.1	12816.9	18948.7	17114.8	8416.9	12214	12397.8	3874.03	6936.18	3636.4	4027.37	4924.37	4028.94	NoTM	outside	Nucleus;Chromosome;Dysplays a punctuate staining pattern in the nucleus	HIST1H1E	3.41004	1.76979	0.002271	2.64378	40	0.0273088	1.5637
[K].SLVSKGTLVQTK.[G]	1xBiotin [K5]	5	8	P16401; P10412	P16401 [89-100]; P10412 [86-97]	P16401 1xBiotin [K93]; P10412 1xBiotin [K90]	Histone H1.5 [OS=Homo sapiens] Histone H1.4 [OS=Homo sapiens]	1	1486.83	2572.8	9550.96	10005.2	26546.5	32588.6	34855.1	30732.7	35111.3	28701.8	30454.2	28834.7	24986.6	12671	9185.54	9012.49	2601.15	7046.58	6158.83	NoTM	outside	Nucleus;Chromosome;According to PubMed:10997781 associates with actively transcribed chromatin and not heterochromatin	HIST1H1B	4.24739	2.08658	0.00227147	2.64369	41	0.0266483	1.57433
[R].SNDPKSQNHPGWLMR.[G]	1xBiotin [K5]; 1xOxidation [M14]	2	7	P06213-1	P06213-1 [567-581]	P06213-1 1xBiotin [K571]	insulin receptor [OS=Homo sapiens]	1	2008.91	4064.53	2714	4068.82	18824.1	15994.6	12800.7	25306.1	15799.5	20963.6	26704.3	17537.6	21691.7	2741.37	1841.69	2131.76	2041.45	3347.37	2873.47	HasTM	outside	Cell membrane;Late endosome;Lysosome;In the presence of SORL1, internalized INSR molecules are redirected back to the cell surface, thereby preventing their lysosomal catabolism and strengthening insulin signal reception	INSR	4.38995	2.1342	0.002417	2.61672	42	0.0276804	1.55783
[R].GFGGKFGVQMDR.[V]	1xBiotin [K5]; 1xOxidation [M10]	3	9	Q14247-1	Q14247-1 [120-131]	Q14247-1 1xBiotin [K124]	Src substrate cortactin [OS=Homo sapiens]	1	1540.7	42270.1	38407	31967.5	17901.1	15565.4	14686.9	23108.4	12752.6	16164	26612.5	16794.4	17688.7	52730.1	41391.5	35139.5	48811.4	27503.2	27086	NoTM	outside	Cytoplasm, cytoskeleton;Cell projection, lamellipodium;Cell projection, ruffle;Cell projection, dendrite;Cell projection;Cell membrane;Cell projection, podosome;Cell junction;Cell junction, focal adhesion;Membrane, clathrin-coated pit;Cell projection, dendritic spine;Cytoplasm, cell cortex;Associated with membrane ruffles and lamellipodia;In the presence of CTTNBP2NL, colocalizes with stress fibe…	CTTN	0.42748	-1.22607	0.00242293	2.61566	43	0.027103	1.56698
[K].KLFVGGLK.[G]	1xBiotin [K1]	1	2	Q13151	Q13151 [99-106]	Q13151 1xBiotin [K99]	Heterogeneous nuclear ribonucleoprotein A0 [OS=Homo sapiens]	1	1087.63	1769.1	4271.46	2059.77	8704.18	11127.2	11129.7	8979.19	11096.4	10645.6	9120.2	7094.8	9947.48	3488.44	4482.66	3626.91	2349.36	2495.9	2536.57	NoTM	outside	Nucleus	HNRNPA0	3.8222	1.9344	0.00252197	2.59826	44	0.0275697	1.55957
[R].LLLPGELAKHAVSEGTK.[A]	1xBiotin [K]	16	26	Q16778; O60814	Q16778 [101-117]; O60814 [101-117]	Q16778 1xBiotin [K]; O60814 1xBiotin [K]	Histone H2B type 2-E [OS=Homo sapiens] Histone H2B type 1-K [OS=Homo sapiens]	1	1989.08	22526.4	27215.9	36236.1	81935.7	115507	108265	77095.6	115221	89077.9	35556.8	58572	42203.9	19789.3	29353.3	34840.4	14623.2	20050.9	24807.2	NoTM	outside	Nucleus;Chromosome	HIST2H2BE	3.55563	1.83011	0.00261104	2.58319	45	0.0279092	1.55425
[R].AQGGQTQSPTKSHTPSPTSPK.[S]	1xBiotin [K11]	2	6	P40123	P40123 [294-314]	P40123 1xBiotin [K304]	Adenylyl cyclase-associated protein 2 [OS=Homo sapiens]	1	2348.13	9716.83	10934.6	11039.6	6300.53	4925.56	6734.8	5403.7	5262.69	5959.74	5345.24	4312.13	3226.71	18551.2	8633.95	9336.78	12042.2	8216.68	12705.6	NoTM	outside	Cell membrane	CAP2	0.566749	-0.819219	0.002696	2.56928	46	0.0281908	1.54989
[K].VIQGCGNPKVNPQGPGPEEK.[R]	1xBiotin [K]; 1xCarbamidomethyl [C5]	1	26	P35052	P35052 [339-358]	P35052 1xBiotin [K]	Glypican-1 [OS=Homo sapiens]	1	2331.12	2656.35	2060.19	2255.74	143577	202593	246397	152391	180118	246469	163970	213223	271554	3207.3	2846.33	2960.11	2757.37	2655.71	3600.53	NoTM	outside	Cell membrane;Lipid-anchor, GPI-anchor;Extracellular side;Endosome;Localizes to CAV1-containing vesicles close to the cell surface;Cleavage of heparan sulfate side chains takes place mainly in late endosomes;Associates with both forms of PRNP in lipid rafts;Colocalizes with APP in perinuclear compartments and with CP in intracellular compartments;Associates with fibrillar APP amyloid-beta peptide…	GPC1	84.989	6.4092	0.00280507	2.55206	47	0.0287072	1.54201
[R].YQKSTELLIR.[K]	1xBiotin [K3]	5	10	P84243	P84243 [55-64]	P84243 1xBiotin [K57]	histone H3.3 [OS=Homo sapiens]	1	1476.79	15840.9	11298.9	11294	27240.4	34368.3	35728.1	38684.3	35004.2	35111.9	39177.1	28129.9	28018.5	10758.1	10331	11319.2	2495.22	5453.04	8229.59	NoTM	inside	Nucleus;Chromosome	H3F3B	2.53258	1.34061	0.00294773	2.53051	48	0.0295388	1.52961
[K].SFVVTSVVAFPTDSKTVQR.[T]	1xBiotin [K15]	1	21	Q9Y5Y6	Q9Y5Y6 [190-208]	Q9Y5Y6 1xBiotin [K204]	suppressor of tumorigenicity 14 protein [OS=Homo sapiens]	1	2294.18	2542.51	2809.88	3931.41	47123.7	73108.7	79032.3	45114.3	91646.1	72244.7	54458.2	87660.2	46690	3763.13	1867.41	3462.72	3642.18	2267.74	3416.74	HasTM	outside	Membrane	ST14	21.4637	4.42383	0.00296316	2.52825	49	0.0290873	1.5363
[R].YESLKGVDPK.[F]	1xBiotin [K5]	1	29	P47914	P47914 [29-38]	P47914 1xBiotin [K33]	60S ribosomal protein L29 [OS=Homo sapiens]	1	1361.68	198234	288449	309322	40653	48116.3	52607.8	59328.7	58372.8	51820.9	61328.6	49890.7	60653	395786	442496	401312	344721	467061	427148	NoTM	inside	NO_DATA	RPL29	0.177608	-2.49323	0.00311785	2.50615	50	0.0299937	1.52297
[R].GFPTIKIFQK.[G]	1xBiotin [K6]	5	14	Q15084-1	Q15084-1 [236-245]	Q15084-1 1xBiotin [K241]	Protein disulfide-isomerase A6 [OS=Homo sapiens]	1	1404.77	18980.4	22504	25606.6	5675.38	8883.41	9730.5	5519.1	9520.55	7769.44	4896.81	7172.46	3010.86	26035.3	30830.1	27079.8	32353.3	29024.4	26079.8	NoTM	outside	Endoplasmic reticulum lumen;Cell membrane;Melanosome	PDIA6	0.362035	-1.4658	0.0033154	2.47946	51	0.0312687	1.50489
[R].GAPLAKVVFR.[D]	1xBiotin [K6]	1	20	P62917	P62917 [55-64]	P62917 1xBiotin [K60]	60S ribosomal protein L8 [OS=Homo sapiens]	1	1283.73	29928.6	34017.7	22789.8	8784.39	7554.44	8728.25	10886.4	8446.59	10184.8	10675.4	9306.67	9080.22	28319.9	27250.6	26588.9	20952.1	27891.6	19825.9	NoTM	outside	Cytoplasm	RPL8	0.289004	-1.79084	0.00340246	2.46821	52	0.0314727	1.50207
[R].KAYGQALAK.[L]	1xBiotin [K1]	2	11	P29401	P29401 [319-327]	P29401 1xBiotin [K319]	Transketolase [OS=Homo sapiens]	1	1175.62	22424.6	19353.9	26498.7	10244.9	9805.98	9953.17	11126.3	7483.48	11761.4	7049.96	7365.72	8389.6	33200.5	28742.5	25323.7	12530.9	15091.1	13927.8	NoTM	outside	NO_DATA	TKT	0.439445	-1.18625	0.00353909	2.45111	53	0.0321189	1.49324
[-].MSSGNAKIGHPAPNFK.[A]	1xBiotin [K7]; 1xMet-loss+Acetyl [N-Term]	1	5	Q06830	Q06830 [1-16]	Q06830 1xBiotin [K7]; 1xMet-loss+Acetyl [N-Term]	peroxiredoxin-1 [OS=Homo sapiens]	1	1792.88	1842.14	1789.9	5418.68	11732.4	11596.1	14837.1	14690.2	11587	14263.6	11279.8	9744.87	7800.34	8344.43	6799.25	4761.5	3203.14	3034.04	2524.27	NoTM	outside	Cytoplasm;Melanosome	PRDX1	4.21687	2.07617	0.0037372	2.42745	54	0.0332888	1.4777
[K].TIAPALVSKK.[L]	1xBiotin [K]	1	10	P06733-1	P06733-1 [72-81]	P06733-1 1xBiotin [K]	alpha-enolase [OS=Homo sapiens]	1	1253.73	2714.99	4617.67	6818.51	12514.3	16326.9	14785.6	19668.5	14869.4	12830.9	12359.1	10783.4	11885.3	8630.39	7594.5	6263.44	4078.42	4080.71	3552.7	NoTM	outside	Cytoplasm;Cell membrane;Cytoplasm, myofibril, sarcomere, M line;ENO1 is localized to the M line;[Isoform MBP-1]: Nucleus;[Isoform MBP-1]: Nucleus	ENO1	3.08291	1.62429	0.00375173	2.42577	55	0.0328105	1.48399
[R].TKSTGGAPTFNVTVTK.[T]	1xBiotin [K2]	1	3	P07737	P07737 [90-105]	P07737 1xBiotin [K91]	profilin-1 [OS=Homo sapiens]	1	1834.94	2116.64	2684.33	2744.87	4553.62	6003.76	5597.5	6138.71	4786	4020.85	2513.83	3581.19	3999.13	3912.52	1738.11	1914.52	2318.45	2135.34	2336.06	NoTM	outside	Cytoplasm, cytoskeleton	PFN1	2.1409	1.09822	0.00381484	2.41852	56	0.0327668	1.48457
[K].AVAASKER.[NS]	1xBiotin [K6]	4	6	P16401; P10412	P16401 [50-57]; P10412 [47-54]	P16401 1xBiotin [K55]; P10412 1xBiotin [K52]	Histone H1.5 [OS=Homo sapiens] Histone H1.4 [OS=Homo sapiens]	1	1057.55	1765.06	2291.26	3968.63	15967.4	23278.6	26729.2	22622.4	24706.2	23134.2	14016.1	16946.5	22495.2	14209.4	13356.9	16031	3748.24	6788.01	11235.2	NoTM	outside	Nucleus;Chromosome;According to PubMed:10997781 associates with actively transcribed chromatin and not heterochromatin	HIST1H1B	8.22127	3.03936	0.00398036	2.40008	57	0.0335887	1.47381
[K].YLLKGEYVGK.[V]	1xBiotin [K4]	2	2	P33151	P33151 [82-91]	P33151 1xBiotin [K85]	Cadherin-5 [OS=Homo sapiens]	1	1395.73	2592.01	3033.98	6396.74	10982.1	12024	13169.3	19874.2	16864.6	13912.7	10895.6	11606.2	2010.3	2698.66	2478.03	2945.09	3192.81	2412.8	1806.4	HasTM	outside	Cell junction;Cell membrane;KRIT1 and CDH5 reciprocally regulate their localization to endothelial cell-cell junctions	CDH5	3.00892	1.58924	0.00404913	2.39264	58	0.0335799	1.47392
[K].HFEAKIEK.[H]	1xBiotin [K5]	1	25	P30533	P30533 [283-290]	P30533 1xBiotin [K287]	alpha-2-macroglobulin receptor-associated protein [OS=Homo sapiens]	1	1227.62	95748	147445	140460	14865.5	27399.6	35353.9	22457.3	30424.6	29042.6	24811.1	33206.2	27305.4	115376	110970	86451.1	131907	151604	120753	HasTM	outside	Rough endoplasmic reticulum lumen;Endoplasmic reticulum-Golgi intermediate compartment lumen;Golgi apparatus, cis- Golgi network;Golgi apparatus lumen;Endosome lumen;Cell surface	LRPAP1	0.202315	-2.30532	0.00410044	2.38717	59	0.033429	1.47588
[R].EQQSTYTFQLKAVDGGVPPR.[S]	1xBiotin [K11]	2	4	Q08174	Q08174 [676-695]	Q08174 1xBiotin [K686]	Protocadherin-1 [OS=Homo sapiens]	1	2447.2	2635.29	3017.26	1928	13098.9	13474.6	19843.5	2766.66	15175.4	14602.3	6040.41	8879.26	1956.73	1966.03	3938.35	3686.07	3951.53	4064.51	4148.45	HasTM	outside	Cell junction;Cell membrane	PCDH1	6.12318	2.61428	0.00424876	2.37174	60	0.0340609	1.46774
[K].GFGGKFGVQTDR.[Q]	1xBiotin [K5]	3	35	Q14247-1	Q14247-1 [231-242]	Q14247-1 1xBiotin [K235]	Src substrate cortactin [OS=Homo sapiens]	1	1494.72	81850.9	98489.2	92422	36867.6	52515.4	54644.1	64227.6	59959.8	51024.8	45579.6	45469.3	40716.8	179747	121129	106023	125996	122181	112947	NoTM	outside	Cytoplasm, cytoskeleton;Cell projection, lamellipodium;Cell projection, ruffle;Cell projection, dendrite;Cell projection;Cell membrane;Cell projection, podosome;Cell junction;Cell junction, focal adhesion;Membrane, clathrin-coated pit;Cell projection, dendritic spine;Cytoplasm, cell cortex;Associated with membrane ruffles and lamellipodia;In the presence of CTTNBP2NL, colocalizes with stress fibe…	CTTN	0.528032	-0.921303	0.00443934	2.35268	61	0.0350053	1.45587
[K].GFGGKYGVQK.[D]	1xBiotin [K5]	3	2	Q14247-1	Q14247-1 [305-314]	Q14247-1 1xBiotin [K309]	Src substrate cortactin [OS=Homo sapiens]	1	1266.63	14725.1	16722.1	17086.3	2556.23	4644.07	8516.17	7609.6	6708.4	6503.11	3986.5	6563.21	5547.51	24048.5	22486.4	22235	18555.1	20435	19349.6	NoTM	outside	Cytoplasm, cytoskeleton;Cell projection, lamellipodium;Cell projection, ruffle;Cell projection, dendrite;Cell projection;Cell membrane;Cell projection, podosome;Cell junction;Cell junction, focal adhesion;Membrane, clathrin-coated pit;Cell projection, dendritic spine;Cytoplasm, cell cortex;Associated with membrane ruffles and lamellipodia;In the presence of CTTNBP2NL, colocalizes with stress fibe…	CTTN	0.323827	-1.6267	0.00446249	2.35042	62	0.0346203	1.46067
[K].YLEKYYNLK.[N]	1xBiotin [K4]	1	7	P03956	P03956 [37-45]	P03956 1xBiotin [K40]	Interstitial collagenase [OS=Homo sapiens]	1	1459.73	2067.95	1727.72	3175.26	6630.35	9982.45	9118.95	9989.19	8998.47	8119.97	10147.8	7421.87	6341.44	2293.06	3788.95	3692.17	3569.79	4043.08	2850.89	NoTM	outside	Secreted, extracellular space, extracellular matrix	MMP1	3.69129	1.88413	0.00466071	2.33155	63	0.0355842	1.44874
[R].KASGPPVSELITK.[A]	1xBiotin [K1]	3	9	P10412	P10412 [34-46]	P10412 1xBiotin [K34]	Histone H1.4 [OS=Homo sapiens]	1	1552.84	3013.87	4185.36	2538.77	9274.98	11800.3	14261.7	10335	10817.6	12046.9	10704.4	9092.26	10717.9	3225.14	6269.91	4757.66	2548.88	3891.8	2926.32	NoTM	outside	Nucleus;Chromosome;Dysplays a punctuate staining pattern in the nucleus	HIST1H1E	3.62877	1.85948	0.00495319	2.30512	64	0.0372263	1.42915
[R].TNEGILKVVK.[A]	1xBiotin [K7]	1	10	P32926	P32926 [324-333]	P32926 1xBiotin [K330]	Desmoglein-3 [OS=Homo sapiens]	1	1326.74	3878.29	2203.12	2695.54	9468	9696.52	13608	15358.1	11921.2	12035.8	34367.4	27053.1	33183.5	2028.27	2037.54	3457.86	2085.1	2373.57	3707.58	NoTM	outside	Cell membrane;Cell junction, desmosome	DSG3	3.73392	1.90069	0.00504577	2.29707	65	0.0373387	1.42784
[R].LASYLDKVR.[A]	1xBiotin [K7]	7	8	P02533; P13645; P19012; Q04695	P02533 [126-134]; P13645 [157-165]; P19012 [116-124]; Q04695 [95-103]	P02533 1xBiotin [K132]; P13645 1xBiotin [K163]; P19012 1xBiotin [K122]; Q04695 1xBiotin [K101]	Keratin, type I cytoskeletal 14 [OS=Homo sapiens] Keratin, type I cytoskeletal 10 [OS=Homo sapiens] Keratin, type I cytoskeletal 15 [OS=Homo sapiens] Keratin, type I cytoskeletal 17 [OS=Homo sapiens]	1	1290.69	2988.83	4369.19	4061.36	10063.8	12220.3	15250.6	10472.5	11655.4	15767.6	10318	8396.95	5830.89	6309.81	9617.96	3810.21	2743.84	5775.63	4636.49	NoTM	outside	Cytoplasm;Nucleus	KRT14	3.28693	1.71674	0.00507337	2.2947	66	0.0369741	1.4321
[R].AKVEFNIR.[K]	1xBiotin [K2]	4	4	Q8NC51-1	Q8NC51-1 [302-309]	Q8NC51-1 1xBiotin [K303]	Plasminogen activator inhibitor 1 RNA-binding protein [OS=Homo sapiens]	1	1202.64	16760.9	27675.8	25022.9	69845.3	98728.1	111031	77002.9	106603	101517	80817.6	99451.1	96248.7	27308.4	35775.3	41553.4	10976.9	27022.8	27609	NoTM	outside	Cytoplasm;Nucleus;Cytoplasm, perinuclear region	SERBP1	4.02542	2.00914	0.00518581	2.28518	67	0.0372294	1.42911
[K].VILHLKEDQTEYLEER.[RW]	1xBiotin [K6]	5	3	P07900; P08238	P07900 [186-201]; P08238 [181-196]	P07900 1xBiotin [K191]; P08238 1xBiotin [K186]	Heat shock protein HSP 90-alpha [OS=Homo sapiens] Heat shock protein HSP 90-beta [OS=Homo sapiens]	1	2241.12	2071.38	2085.41	2566.39	5237.76	6577.46	7957.77	3872.96	4984.45	6862.42	3930.28	2213.02	2386.01	2699.81	2824.26	3992.48	2736.05	4000.48	1920.32	NoTM	outside	Nucleus;Cytoplasm;Melanosome;Cell membrane	HSP90AA1	2.94102	1.55631	0.00560042	2.25178	68	0.0396148	1.40214
[R].NIGKTLVTR.[T]	1xBiotin [K4]	1	7	P61247	P61247 [43-51]	P61247 1xBiotin [K46]	40S ribosomal protein S3a [OS=Homo sapiens]	1	1227.69	18729.3	20943.3	17217.2	3382.21	6130.77	10312.5	4106.95	6089.18	9735.58	8266.6	9357.5	9284.09	20601.6	21896	15954.7	13335.7	19254	19756.7	NoTM	outside	Cytoplasm;Nucleus	RPS3A	0.348488	-1.52082	0.0056834	2.24539	69	0.0396191	1.4021
[K].YIDQEELNKTKPIWTR.[N]	1xBiotin [K]	5	2	P07900; P08238	P07900 [284-299]; P08238 [276-291]	P07900 1xBiotin [K]; P08238 1xBiotin [K]	Heat shock protein HSP 90-alpha [OS=Homo sapiens] Heat shock protein HSP 90-beta [OS=Homo sapiens]	1	2260.14	2707.07	3597.71	3688.58	6094.42	6281.51	7910.07	3568.07	6598.76	5656.61	2499.67	3939.73	2865.7	3942	3767.81	4087.07	2991.13	4019.27	2479.46	NoTM	outside	Nucleus;Cytoplasm;Melanosome;Cell membrane	HSP90AA1	2.02995	1.02144	0.00638748	2.19467	70	0.0438911	1.35762
[R].SELELLKLR.[S]	1xBiotin [K7]	1	3	Q8IYS1	Q8IYS1 [18-26]	Q8IYS1 1xBiotin [K24]	Peptidase M20 domain-containing protein 2 [OS=Homo sapiens]	1	1326.74	10449.9	17834	14626.2	1802.22	2628	3860.87	2084.94	2093.99	3251.51	3125.45	3402.15	3309.1	12747.1	16225.6	14443.6	11658	18657.7	15560.4	NoTM	outside	NO_DATA	PM20D2	0.19322	-2.37168	0.00652314	2.18554	71	0.044192	1.35466
[R].LKGIVPLAK.[V]	1xBiotin [K2]	1	2	P30101	P30101 [74-82]	P30101 1xBiotin [K75]	Protein disulfide-isomerase A3 [OS=Homo sapiens]	1	1164.72	2626.12	3837.54	5953.45	12581.6	17505.8	20304.1	20706.7	21308	19130.7	20367.1	17602.2	17098.2	2409.8	7179.9	2387.94	2297.22	3603.49	4779.68	NoTM	outside	Endoplasmic reticulum;Endoplasmic reticulum lumen;Melanosome	PDIA3	4.05823	2.02085	0.0067432	2.17113	72	0.0450483	1.34632
[K].EAGGGGVGGPGAKSAAQAAAQTNSNAAGK.[Q]	1xBiotin [K13]	4	4	Q8NC51-1	Q8NC51-1 [40-68]	Q8NC51-1 1xBiotin [K52]	Plasminogen activator inhibitor 1 RNA-binding protein [OS=Homo sapiens]	1	2681.27	2798.28	1806.06	3832.43	8376.93	11552	13595.6	1816.19	9021.54	12156	6103.06	9723.86	2091.21	3117.42	3365.13	3844.88	3832.06	1819.45	5478.58	NoTM	outside	Cytoplasm;Nucleus;Cytoplasm, perinuclear region	SERBP1	3.97362	1.99045	0.00679265	2.16796	73	0.044757	1.34914
[K].EGLELLKTAIGK.[A]	1xBiotin [K7]	2	7	P06733-1	P06733-1 [222-233]	P06733-1 1xBiotin [K228]	alpha-enolase [OS=Homo sapiens]	1	1497.83	3411.87	2816.44	3985.14	6686.02	9439.77	9686.52	4820.34	8824.07	7302.49	7288.8	6489.11	1804.2	1823.96	2332.33	1792.63	2847.22	2914.32	4095.03	NoTM	outside	Cytoplasm;Cell membrane;Cytoplasm, myofibril, sarcomere, M line;ENO1 is localized to the M line;[Isoform MBP-1]: Nucleus;[Isoform MBP-1]: Nucleus	ENO1	2.52729	1.33759	0.00697336	2.15656	74	0.0453268	1.34364
[R].SGVSLAALKK.[A]	1xBiotin [K9]	3	2	P10412	P10412 [55-64]	P10412 1xBiotin [K63]	Histone H1.4 [OS=Homo sapiens]	1	1199.68	3670.17	2870.6	4392.3	10406.4	13734.3	17313.7	11779.6	13877.1	14173	9230.13	12058.3	10915.9	1862.85	5680.47	2099.97	3120.7	1944.95	3013.79	NoTM	outside	Nucleus;Chromosome;Dysplays a punctuate staining pattern in the nucleus	HIST1H1E	3.79166	1.92283	0.00758857	2.11984	75	0.048668	1.31276
[K].HQPTAIIAKTFK.[G]	1xBiotin [K9]	2	25	P29401	P29401 [233-244]	P29401 1xBiotin [K241]	Transketolase [OS=Homo sapiens]	1	1580.86	36153.3	42204.3	36890	16927.8	24279	25371.2	19689.5	24243.7	24907.5	25909.8	23560	25074.1	44176.9	49693	40856.3	24258.6	43766	28647	NoTM	outside	NO_DATA	TKT	0.577695	-0.791621	0.00766064	2.11573	76	0.0484838	1.3144
[R].APKFTQPLQPR.[S]	1xBiotin [K3]	2	3	Q96PD2-1	Q96PD2-1 [486-496]	Q96PD2-1 1xBiotin [K488]	Discoidin, CUB and LCCL domain-containing protein 2 [OS=Homo sapiens]	1	1508.8	2094.32	2162.6	3297.19	5551.73	8402.75	7205.28	7533.12	7073.5	5836.1	5675.15	6298.06	7269.82	1978.85	4038	2155.37	3326.37	2201.19	3292.07	HasTM	outside	Membrane	DCBLD2	2.80109	1.48599	0.00769385	2.11386	77	0.0480616	1.3182
[R].GTKVILHLK.[E]	1xBiotin [K3]	5	13	P07900; P08238	P07900 [183-191]; P08238 [178-186]	P07900 1xBiotin [K185]; P08238 1xBiotin [K180]	Heat shock protein HSP 90-alpha [OS=Homo sapiens] Heat shock protein HSP 90-beta [OS=Homo sapiens]	1	1234.73	97318.5	82754.3	78445.6	116330	134308	137517	188980	143089	153082	194413	163164	144653	99886.3	104281	83656.6	99058.2	95888.1	77571.1	NoTM	outside	Nucleus;Cytoplasm;Melanosome;Cell membrane	HSP90AA1	1.50146	0.586363	0.00773638	2.11146	78	0.0477077	1.32141
[R].QQEGFKGTFPDAR.[E]	1xBiotin [K6]	2	21	Q15233	Q15233 [366-378]	Q15233 1xBiotin [K371]	Non-POU domain-containing octamer-binding protein [OS=Homo sapiens]	1	1706.8	16668.3	20473	24771.1	9654.44	7553.38	8969.81	10558.7	7255.17	7887.24	6744.21	10432.5	13049.2	29347.6	27920.7	26629.1	42854.5	25078.8	28379.4	NoTM	outside	Nucleus;Nucleus, nucleolus;Nucleus speckle	NONO	0.422817	-1.24189	0.00792797	2.10084	79	0.0482703	1.31632
[K].GKSADFTNFDPR.[G]	1xBiotin [K2]	1	16	P00918	P00918 [170-181]	P00918 1xBiotin [K171]	Carbonic anhydrase 2 [OS=Homo sapiens]	1	1580.72	2261.64	11809.1	9522.05	22627	21119	25453.3	18090.7	18922	20724.6	18682	20164.8	19210.5	11063.4	13882.2	9830.93	11334.1	15616.2	12662.8	NoTM	outside	Cytoplasm;Cell membrane;Displaced from the cytosolic surface of the cell membrane by PKC in phorbol myristate acetate (PMA)-induced cells	CA2	2.93307	1.55241	0.00844715	2.07329	80	0.0507885	1.29423
[K].HAVSEGTKAVTK.[Y]	1xBiotin [K8]	16	18	Q16778; O60814	Q16778 [110-121]; O60814 [110-121]	Q16778 1xBiotin [K117]; O60814 1xBiotin [K117]	Histone H2B type 2-E [OS=Homo sapiens] Histone H2B type 1-K [OS=Homo sapiens]	1	1453.75	3622	17158.8	16341.4	38181.3	48766.9	59808.7	44572.2	51164.4	57642.3	34269.1	41314.4	41724.5	28445.6	23673.2	17998.9	1731.97	22446.9	14343.1	NoTM	outside	Nucleus;Chromosome	HIST2H2BE	3.95334	1.98307	0.00870694	2.06013	81	0.0517042	1.28647
[K].EIKAIASIPTER.[Y]	1xBiotin [K3]	1	12	P17301	P17301 [328-339]	P17301 1xBiotin [K330]	Integrin alpha-2 [OS=Homo sapiens]	1	1553.84	14299.1	12076.7	13125.3	7979	9874.4	7329.24	11692.6	11475.8	10824.3	3535.4	3530.63	2198.01	15223.1	16182.3	10326.7	1992.46	6848.13	4514.55	HasTM	outside	Membrane;Single-pass type I membrane protein	ITGA2	0.637517	-0.649465	0.00874423	2.05828	82	0.0512924	1.28995
[K].TLNNKFASFIDK.[V]	1xBiotin [K5]	13	14	P35908; P04259; P02538; P05787; P13647	P35908 [184-195]; P04259 [169-180]; P02538 [169-180]; P05787 [97-108]; P13647 [174-185]	P35908 1xBiotin [K188]; P04259 1xBiotin [K173]; P02538 1xBiotin [K173]; P05787 1xBiotin [K101]; P13647 1xBiotin [K178]	Keratin, type II cytoskeletal 2 epidermal [OS=Homo sapiens] keratin, type II cytoskeletal 6B [OS=Homo sapiens] Keratin, type II cytoskeletal 6A [OS=Homo sapiens] Keratin, type II cytoskeletal 8 [OS=Homo sapiens] keratin, type II cytoskeletal 5 [OS=Homo sapiens]	1	1623.82	8633.55	8539.13	13010.4	16668.1	20192.1	19628.6	9582.58	22126.6	15478.9	2468.53	10889.1	3737.8	13814.2	10277.2	9079.07	3305.45	6134.97	9571.36	NoTM	outside	NO_DATA	KRT2	1.87154	0.904223	0.00879735	2.05565	83	0.0509822	1.29258
[R].STLNEIYFGKTK.[D]	1xBiotin [K]	2	16	P47756-1	P47756-1 [226-237]	P47756-1 1xBiotin [K]	F-actin-capping protein subunit beta [OS=Homo sapiens]	1	1626.82	12077.2	13380.7	13110.1	15179	15678.7	16867.5	17097	14306.2	17371.8	16477.9	16032.6	17779.7	14615.7	15234.8	10220.1	16357.1	15609.5	15816.4	NoTM	outside	Cytoplasm, cytoskeleton;Cytoplasm, myofibril, sarcomere	CAPZB	1.23743	0.30735	0.0088034	2.05535	84	0.05041	1.29748
[R].QYAKDIGFIK.[LK]	1xBiotin [K4]	2	9	P62273-1	P62273-1 [45-54]	P62273-1 1xBiotin [K48]	40S ribosomal protein S29 [OS=Homo sapiens]	1	1408.73	11002.9	18764.6	13681.6	4072.11	3549.68	3246.02	2398.28	4518.69	4396.32	3451.6	5708.16	2070.05	17668.1	19527	16584.2	11292.9	17501.4	19153.1	NoTM	outside	Cytoplasm, cytosol;Cytoplasm;Rough endoplasmic reticulum;Detected in ribosomes that are associated with the rough endoplasmic reticulum (By similarity)	RPS29	0.250128	-1.99926	0.00900519	2.04551	85	0.0509588	1.29278
[K].IISKIENHEGVR.[R]	1xBiotin [K4]	3	8	P14618	P14618 [267-278]	P14618 1xBiotin [K270]	Pyruvate kinase PKM [OS=Homo sapiens]	1	1620.85	3220.07	7860.2	8197.75	16103.1	15116.4	20486.2	14804.4	14127.4	17067.7	12596.9	13968.9	12921.7	9044.43	14021.7	7817.65	10533.6	9451.25	2850.54	NoTM	outside	Cytoplasm;Nucleus;Nuclear translocation is sufficient to induce cell death that is caspase independent, isoform-specific and independent of its enzymatic activity	PKM	2.68211	1.42337	0.00934859	2.02925	86	0.0522869	1.28161
[K].VIPELNGKLTGMAFR.[V]	1xBiotin [K8]; 1xOxidation [M12]	2	32	P04406-1	P04406-1 [220-234]	P04406-1 1xBiotin [K227]	glyceraldehyde-3-phosphate dehydrogenase [OS=Homo sapiens]	1	1887.98	45654.5	42572.8	37169.5	29749.4	26530.8	21827.5	25533	30941.6	31179.5	35555.3	39643.7	46594.8	35755.2	42982	39277	50638.7	45525.2	50967.9	NoTM	outside	Cytoplasm, cytosol;Nucleus;Cytoplasm, perinuclear region;Membrane;Cytoplasm, cytoskeleton;Postnuclear and Perinuclear regions	GAPDH	0.622884	-0.682964	0.0095869	2.01832	87	0.0530034	1.2757
[R].TSDKGQFFR.[V]	1xBiotin [K4]	1	13	P33151	P33151 [412-420]	P33151 1xBiotin [K415]	Cadherin-5 [OS=Homo sapiens]	1	1311.62	29774.4	25944.3	23007.9	10984.1	15647.9	16371.1	22779.9	21058.3	21118.6	6997.4	6054.39	3760.68	26835.2	21194	17220.7	8891.48	7263.54	7749.77	HasTM	outside	Cell junction;Cell membrane;KRIT1 and CDH5 reciprocally regulate their localization to endothelial cell-cell junctions	CDH5	0.546233	-0.872411	0.00999493	2.00022	88	0.0546314	1.26256
[R].KTVGVEPAADGK.[G]	1xBiotin [K1]	5	3	P46779	P46779 [47-58]	P46779 1xBiotin [K47]	60S ribosomal protein L28 [OS=Homo sapiens]	1	1397.71	3393.65	1885.41	2217.19	8132.89	5458.01	8561.38	11114.8	7654.31	8713.14	4723.79	2090.36	6529.28	6908.24	7876.52	3393.12	2948.77	5654.35	4717.65	NoTM	outside	NO_DATA	RPL28	2.95512	1.56321	0.0104067	1.98269	89	0.0562427	1.24993
[K].KLNVTEQEK.[I]	1xBiotin [K1]	1	6	P06733-1	P06733-1 [81-89]	P06733-1 1xBiotin [K81]	alpha-enolase [OS=Homo sapiens]	1	1314.67	9463.71	6201.01	2122.32	14942.4	18267.6	20130.9	19148.6	20425	20154.8	16904.5	13065.8	14553.9	9817.5	5424.35	3754.53	3537.75	5894.65	3260.49	NoTM	outside	Cytoplasm;Cell membrane;Cytoplasm, myofibril, sarcomere, M line;ENO1 is localized to the M line;[Isoform MBP-1]: Nucleus;[Isoform MBP-1]: Nucleus	ENO1	2.99887	1.58442	0.0104927	1.97911	90	0.0560775	1.25121
[K].HQKITDSR.[Y]	1xBiotin [K3]	4	1	Q92859	Q92859 [882-889]	Q92859 1xBiotin [K884]	neogenin [OS=Homo sapiens]	1	1210.6	4001.58	4149.45	1873.35	8056.71	6994.22	6590.71	11895.5	5604.63	6119.38	10579.5	7998.62	6925.14	2331.17	2988.57	2178.05	2689.93	2354.52	3783.61	HasTM	outside	Cell membrane;Single-pass type I membrane protein	NEO1	2.1589	1.1103	0.010604	1.97453	91	0.0560499	1.25142
[R].KDLYANTVLSGGTTMYPGIADR.[M]	1xBiotin [K1]; 1xOxidation [M15]	2	7	P60709	P60709 [291-312]	P60709 1xBiotin [K291]	Actin, cytoplasmic 1 [OS=Homo sapiens]	1	2585.24	3941.81	2217.63	3863.43	19971.2	12406.8	12471.1	15129.1	12795.1	14796.9	2186.32	9742.26	10471.7	2889.07	2804.21	2153.32	2862.73	2796.36	4132.14	NoTM	outside	Cytoplasm, cytoskeleton;Nucleus	ACTB	4.47468	2.16178	0.0107252	1.9696	92	0.056074	1.25124
[R].LIFAGKQLEDGR.[T]	1xBiotin [K6]	4	8	P62987	P62987 [43-54]	P62987 1xBiotin [K48]	Ubiquitin-60S ribosomal protein L40 [OS=Homo sapiens]	1	1572.82	3887.89	7329.5	4861.33	9516.74	10587.3	10600.2	6539.49	8812.28	13004.9	6541.8	10086.3	2333.94	3721.29	1945.07	5344.31	3754.18	2460.9	3024.06	NoTM	outside	[Ubiquitin]: Cytoplasm;Nucleus;[60S ribosomal protein L40]: Cytoplasm;[60S ribosomal protein L40]: Cytoplasm	UBA52	1.90962	0.933282	0.0108913	1.96292	93	0.0563305	1.24926
[R].LVKETR.[I]	1xBiotin [K3]	1	2	O00622	O00622 [260-265]	O00622 1xBiotin [K262]	Protein CYR61 [OS=Homo sapiens]	1	971.534	26581.2	22795.2	28032.6	13080.2	17120.7	17969.5	19131	16738	18379.2	3531.79	7273.74	7365.87	26199.4	26173.2	21215.5	2222.28	11141.7	6907.68	NoTM	outside	Secreted	CCN1	0.622284	-0.684356	0.0109081	1.96225	94	0.055817	1.25323
[K].AVTKAQK.[K]	1xBiotin [K4]	13	2	Q16778; O60814	Q16778 [18-24]; O60814 [18-24]	Q16778 1xBiotin [K21]; O60814 1xBiotin [K21]	Histone H2B type 2-E [OS=Homo sapiens] Histone H2B type 1-K [OS=Homo sapiens]	1	971.534	5466.47	10245	10879.4	17684.2	26310.1	23443.9	18076	25327.7	28195.8	2706.99	16960.7	19807.8	13530.9	11767.2	10314.7	6596	7295.17	9654.42	NoTM	outside	Nucleus;Chromosome	HIST2H2BE	2.53614	1.34263	0.0112258	1.94978	95	0.0568383	1.24536
[R].SGKYDLDFK.[S]	1xBiotin [K3]	2	16	P06733-1	P06733-1 [254-262]	P06733-1 1xBiotin [K256]	alpha-enolase [OS=Homo sapiens]	1	1298.61	10591.8	10583.1	10500.9	25574.3	37817.7	45659.5	34814.7	38722.5	41298.4	41871	38215.7	33663.9	20355.2	17965.8	14813.5	15520.8	17041.6	15927.2	NoTM	outside	Cytoplasm;Cell membrane;Cytoplasm, myofibril, sarcomere, M line;ENO1 is localized to the M line;[Isoform MBP-1]: Nucleus;[Isoform MBP-1]: Nucleus	ENO1	3.44274	1.78356	0.0115727	1.93657	96	0.0579838	1.23669
[K].AKGILFVGSGVSGGEEGAR.[Y]	1xBiotin [K2]	2	6	P52209	P52209 [118-136]	P52209 1xBiotin [K119]	6-phosphogluconate dehydrogenase, decarboxylating [OS=Homo sapiens]	1	2017.02	2297.8	3992.24	3792.96	5748.55	6246.8	5601.77	9536.74	6158.6	6805.01	6129.94	5311.12	2399.68	6917.94	3054.4	3635.5	3273.87	3251.35	4522.63	NoTM	outside	Cytoplasm	PGD	1.74522	0.803413	0.0116891	1.93222	97	0.0579635	1.23685
[K].AQAYQTGKDISTNYYASQK.[K]	1xBiotin [K8]	1	16	P14625	P14625 [664-682]	P14625 1xBiotin [K671]	Endoplasmin [OS=Homo sapiens]	1	2363.1	3318.19	6651.62	3830.71	17009.5	26258.7	32990.4	18549	28038	25358.4	28235.9	21186.1	23968.4	2588.75	15376.7	13082.1	13619.7	16419.7	11685.9	NoTM	outside	Endoplasmic reticulum lumen;Sarcoplasmic reticulum lumen;Melanosome	HSP90B1	5.52578	2.46618	0.01182	1.92738	98	0.0580145	1.23646
[K].QLATKAAR.[K]	1xBiotin [K5]	4	6	P84243	P84243 [20-27]	P84243 1xBiotin [K24]	histone H3.3 [OS=Homo sapiens]	1	1084.59	3499.11	2629.99	3600.65	10534.6	15756.9	20147	14511.4	18315.8	18959	7220.87	3170.01	15722.8	7945.52	7549.34	2424.38	2392.28	3374.12	2827.53	NoTM	inside	Nucleus;Chromosome	H3F3B	4.77283	2.25485	0.0118991	1.92449	99	0.0578128	1.23798
[K].EVSTYIKK.[I]	1xBiotin [K]	3	10	P68104	P68104 [173-180]	P68104 1xBiotin [K]	Elongation factor 1-alpha 1 [OS=Homo sapiens]	1	1193.62	3442.66	9129.13	9270.41	16113.5	15114.7	18597.1	21317.2	15225.5	18857.5	10007.7	9042.58	9898.78	21505.3	12358.1	11394.4	2320.74	6467.45	4480.99	NoTM	outside	Cytoplasm;Nucleus;Nucleus, nucleolus;Cell membrane;Translocates together with ZPR1 from the cytoplasm to the nucleus and nucleolus after treatment with mitogens (PubMed:8650580);Localization at the cell membrane depends on EEF1A1 phosphorylation status and the presence of PPP1R16B (PubMed:26497934)	EEF1A1	2.28115	1.18976	0.0128776	1.89016	100	0.0619415	1.20802
[K].NLKLGIHEDSTNR.[R]	1xBiotin [K3]	1	1	P08238	P08238 [436-448]	P08238 1xBiotin [K438]	Heat shock protein HSP 90-beta [OS=Homo sapiens]	1	1722.86	1717.18	6764	4863.86	12663.3	13696.8	19293.3	16624	14096.5	16551.4	10437.4	9355.74	10336.7	1828.31	8363.6	8830.62	1809.57	6502.57	5223.84	NoTM	outside	Cytoplasm;Melanosome;Nucleus;Secreted;Cell membrane;Translocates with BIRC2 from the nucleus to the cytoplasm during differentiation (PubMed:18239673);Secreted when associated with TGFB1 processed form (LAP) (PubMed:20599762)	HSP90AB1	3.421	1.77442	0.0131099	1.8824	101	0.0624342	1.20458
[R].ITLSKHQNVQLPR.[E]	1xBiotin [K5]	3	13	P26599	P26599 [406-418]	P26599 1xBiotin [K410]	Polypyrimidine tract-binding protein 1 [OS=Homo sapiens]	1	1759.96	33951.1	28712.2	36399.1	19301.1	21775.2	24109.2	27686.8	30949.8	23963.8	36246.7	32313.9	34907.4	30721.3	33729.9	30488.3	38943.4	29841.4	32108.3	NoTM	outside	Nucleus	PTBP1	0.658024	-0.603787	0.0131824	1.88	102	0.0621642	1.20646
[R].DWVVAPISVPENGKGPFPQR.[L]	1xBiotin [K14]	2	15	P22223-1	P22223-1 [108-127]	P22223-1 1xBiotin [K121]	Cadherin-3 [OS=Homo sapiens]	1	2419.22	2358.22	2881.27	3003.96	27814.2	56739.8	63955.9	13760	62762.1	43413.6	17033.1	68369.7	25715	2516.23	3340.04	2389.46	2142.03	2904.2	1820.65	HasTM	outside	Cell membrane;Single-pass type I membrane protein	CDH3	18.0155	4.17117	0.0133344	1.87503	103	0.0622704	1.20572
[K].VQVSYKGETK.[A]	1xBiotin [K6]	1	2	P0DMV8	P0DMV8 [103-112]	P0DMV8 1xBiotin [K108]	heat shock 70 kDa protein 1A [OS=Homo sapiens]	1	1364.69	4011.45	2701.3	6884.08	11628.1	11184.3	16182.4	14052.2	10779.3	16012	1892.35	14002.8	10939.9	2990.57	7873.27	9904.73	2439.98	8606.59	5049.71	NoTM	outside	Cytoplasm;Nucleus;Cytoplasm, cytoskeleton, microtubule organizing center, centrosome	HSPA1A	2.86793	1.52001	0.0137745	1.86092	104	0.063707	1.19581
[R].KAGNFYVPAEPK.[L]	1xBiotin [K1]	1	3	P18124	P18124 [77-88]	P18124 1xBiotin [K77]	60S ribosomal protein L7 [OS=Homo sapiens]	1	1546.77	1892.18	3070.96	2092.01	3922.34	3812.04	4376.32	3688.63	4478.7	4634.18	3157.43	1811.24	1732.77	1726.99	5823.62	3839.51	2361.75	3595.61	2101.21	NoTM	outside	NO_DATA	RPL7	1.71658	0.779534	0.0139095	1.85669	105	0.0637186	1.19573
[K].EFEGKTLVSVTK.[E]	1xBiotin [K5]	3	7	P07900	P07900 [535-546]	P07900 1xBiotin [K539]	Heat shock protein HSP 90-alpha [OS=Homo sapiens]	1	1563.81	3497.82	2919.91	5164.17	7942.22	11514.5	13231.4	9280.73	9694.17	11284	11072.4	10655.7	9678.92	8463.95	10976.6	6157.91	2111.55	9742.64	5158.5	NoTM	outside	Nucleus;Cytoplasm;Melanosome;Cell membrane	HSP90AA1	2.82234	1.49689	0.0143066	1.84446	106	0.0649198	1.18762
[R].YMGKGVSK.[A]	1xBiotin [K4]; 1xOxidation [M2]	1	4	P06733-1	P06733-1 [57-64]	P06733-1 1xBiotin [K60]	alpha-enolase [OS=Homo sapiens]	1	1111.53	4092.22	5488.76	3947.7	14473	9553.39	9922.16	17543.1	9952.59	10061.9	12834.4	10886.4	13105.7	3682	3927.84	3271.84	9824.52	2560.35	3477.48	NoTM	outside	Cytoplasm;Cell membrane;Cytoplasm, myofibril, sarcomere, M line;ENO1 is localized to the M line;[Isoform MBP-1]: Nucleus;[Isoform MBP-1]: Nucleus	ENO1	2.50938	1.32733	0.0147451	1.83135	107	0.0662841	1.17859
[K].KLFGTSGQK.[T]	1xBiotin [K1]	3	8	P00533-1	P00533-1 [479-487]	P00533-1 1xBiotin [K479]	epidermal growth factor receptor [OS=Homo sapiens]	1	1191.62	33222.8	35732.1	38741.7	88044.9	116478	159935	162930	141968	168434	139870	131013	155176	33591.6	33876.6	27707.6	2360.49	15395.7	11648.7	HasTM	outside	Cell membrane;Endoplasmic reticulum membrane ;Single-pass type I membrane protein;Golgi apparatus membrane;Single-pass type I membrane protein;Nucleus membrane;Single-pass type I membrane protein;Endosome;Endosome membrane;Nucleus;Endocytosed upon activation by ligand (PubMed:2790960, PubMed:17182860, PubMed:27153536);Colocalized with GPER1 in the nucleus of estrogen agonist-induced cancer-associ…	EGFR	3.38412	1.75878	0.0150669	1.82198	108	0.0671035	1.17325
[K].AVELAANTKGICFIR.[T]	1xBiotin [K9]; 1xCarbamidomethyl [C12]	2	19	P29401	P29401 [457-471]	P29401 1xBiotin [K465]	Transketolase [OS=Homo sapiens]	1	1888.98	21179.5	24029.4	33841.2	8398.75	9194.32	12370.9	8166.1	8675.43	12967.4	16183.7	10343.4	3744.93	34888	24261.8	24917.3	2693.95	21809.5	27959.5	NoTM	outside	NO_DATA	TKT	0.379051	-1.39954	0.0152497	1.81674	109	0.0672947	1.17202
[R].KPESNAVTKTAGPIASAQK.[Q]	1xBiotin [K9]	4	4	P27816-1	P27816-1 [968-986]	P27816-1 1xBiotin [K976]	Microtubule-associated protein 4 [OS=Homo sapiens]	1	2124.11	3641.8	3236.85	1826.08	5498.5	8199.67	8750.75	7675.71	8951.05	8531.29	4140.72	8898.7	2043.06	4028.16	3451.44	1938.62	2915.29	3172.74	3212.77	NoTM	outside	Cytoplasm, cytoskeleton	MAP4	2.57894	1.36678	0.0161475	1.79189	110	0.0706087	1.15114
[K].TGFGGKFGVQSER.[Q]	1xBiotin [K6]	1	18	Q14247-1	Q14247-1 [267-279]	Q14247-1 1xBiotin [K272]	Src substrate cortactin [OS=Homo sapiens]	1	1595.76	22131.6	33984.6	27092.8	12620	9027.9	15181.5	15677.8	10853.4	11385.7	11262.7	10056.9	9741.74	45579.3	32514.8	29761.7	35369.5	34173.2	36074.7	NoTM	outside	Cytoplasm, cytoskeleton;Cell projection, lamellipodium;Cell projection, ruffle;Cell projection, dendrite;Cell projection;Cell membrane;Cell projection, podosome;Cell junction;Cell junction, focal adhesion;Membrane, clathrin-coated pit;Cell projection, dendritic spine;Cytoplasm, cell cortex;Associated with membrane ruffles and lamellipodia;In the presence of CTTNBP2NL, colocalizes with stress fibe…	CTTN	0.442613	-1.17588	0.0162352	1.78954	111	0.0703526	1.15272
[K].VLKQVHPDTGISSK.[A]	1xBiotin [K3]	16	27	Q16778; O60814	Q16778 [45-58]; O60814 [45-58]	Q16778 1xBiotin [K47]; O60814 1xBiotin [K47]	Histone H2B type 2-E [OS=Homo sapiens] Histone H2B type 1-K [OS=Homo sapiens]	1	1734.92	22583.2	29116.9	29438.1	107631	189749	240603	133903	168230	167529	93996.9	117261	132472	25314.6	34472.6	24442.8	19254	19381.9	21227	NoTM	outside	Nucleus;Chromosome	HIST2H2BE	6.63047	2.72911	0.0171811	1.76495	112	0.0737867	1.13202
[R].KSSTPEEVK.[K]	1xBiotin [K1]	1	4	P23528	P23528 [22-30]	P23528 1xBiotin [K22]	Cofilin-1 [OS=Homo sapiens]	1	1230.6	7494.43	3240.53	9246.18	13497.4	14002.8	16930.6	16148.8	15131.2	20855.1	15986.2	12123	20418.7	13869.4	3750.37	3392.44	2322.89	12815.5	2274.48	NoTM	outside	Nucleus matrix;Cytoplasm, cytoskeleton;Cell projection, ruffle membrane;Cell projection, lamellipodium membrane;Cell projection, lamellipodium;Detected at the cleavage furrow and contractile ring during cytokinesis;Almost completely in nucleus in cells exposed to heat shock or 10% dimethyl sulfoxide	CFL1	2.22364	1.15292	0.0172629	1.76289	113	0.0734819	1.13382
[RK].VGDKIATR.[K]	1xBiotin [K4]	5	7	P29401	P29401 [311-318]	P29401 1xBiotin [K314]	Transketolase [OS=Homo sapiens]	1	1085.58	40059.4	45954.9	54426.4	27873.5	28850.9	32397.1	28755.1	27044.9	27945.4	28496.7	27320.2	38912.6	55958.9	68360.2	38739	37334.5	36623.3	40096.4	NoTM	outside	NO_DATA	TKT	0.634585	-0.656116	0.0175933	1.75465	114	0.0742312	1.12941
[K].KHLEINPDHPIVETLR.[Q]	1xBiotin [K1]	1	6	P08238	P08238 [624-639]	P08238 1xBiotin [K624]	Heat shock protein HSP 90-beta [OS=Homo sapiens]	1	2137.12	2734.64	3564.7	3265.34	10169.4	9848.39	5878.3	2137.46	9859.56	7749.78	3807.34	2919.31	3983.01	3627.76	2250.24	4588.51	3117.72	4092	3093.99	NoTM	outside	Cytoplasm;Melanosome;Nucleus;Secreted;Cell membrane;Translocates with BIRC2 from the nucleus to the cytoplasm during differentiation (PubMed:18239673);Secreted when associated with TGFB1 processed form (LAP) (PubMed:20599762)	HSP90AB1	2.70747	1.43694	0.0177623	1.7505	115	0.0742927	1.12905
[K].TKDEPQR.[E]	1xBiotin [K2]	1	12	P21926	P21926 [134-140]	P21926 1xBiotin [K135]	CD9 antigen [OS=Homo sapiens]	1	1099.52	50785.8	43429.6	47018.4	31819.6	25871.5	37482.8	40335.6	41928.6	39073.2	15680.9	11809.6	12627.2	57817.6	44607.4	40763.9	28074.9	20990	18608.6	HasTM	outside	Cell membrane;Membrane;Secreted, extracellular exosome;Accumulates in the adhesion area between the sperm and egg following interaction between IZUMO1 and its receptor IZUMO1R/JUNO	CD9	0.673875	-0.569447	0.01801	1.74449	116	0.0746792	1.1268
[K].EKYIDQEELNK.[T]	1xBiotin [K2]	5	11	P07900; P08238	P07900 [282-292]; P08238 [274-284]	P07900 1xBiotin [K283]; P08238 1xBiotin [K275]	Heat shock protein HSP 90-alpha [OS=Homo sapiens] Heat shock protein HSP 90-beta [OS=Homo sapiens]	1	1634.77	3157.15	8464.36	8146.1	12300.7	15999.5	15822.9	14713.7	15740.6	15324.6	13468	10144.4	11329	14391.7	10843.2	10438.1	2188.79	10263.9	6746.37	NoTM	outside	Nucleus;Cytoplasm;Melanosome;Cell membrane	HSP90AA1	2.23209	1.15839	0.0180167	1.74432	117	0.0740687	1.13037
[R].GHDQYAYDGKDYIALNEDLR.[S]	1xBiotin [K10]	1	5	P01889	P01889 [136-155]	P01889 1xBiotin [K145]	HLA class I histocompatibility antigen, B-7 alpha chain [OS=Homo sapiens]	1	2582.16	2847.57	5960.15	6483.6	19751	21919.9	36864.3	9897.7	30404.6	21491.9	20616.7	37320.7	37366	3813.98	7963.56	3159.38	2266.73	3248.97	3894.81	HasTM	outside	Cell membrane;Endoplasmic reticulum membrane	HLA-B	5.13593	2.36063	0.0185479	1.73171	118	0.0756061	1.12144
[K].KPAAAGVK.[K]	1xBiotin [K1]	1	1	P16401	P16401 [161-168]	P16401 1xBiotin [K161]	Histone H1.5 [OS=Homo sapiens]	0	967.539	3748.52	2267.69	3162.84	6599.75	7204.31	10646.2	7300.25	8858.62	9098.45	3798.43	5525.19	6070.62	4758.25	5362.82	2056.26	3745.04	4162.24	3347.07	NoTM	outside	Nucleus;Chromosome;According to PubMed:10997781 associates with actively transcribed chromatin and not heterochromatin	HIST1H1B	2.6637	1.41343	0.0187393	1.72725	119	0.0757444	1.12065
[R].KESYSVYVYK.[V]	1xBiotin [K1]	10	11	O60814	O60814 [35-44]	O60814 1xBiotin [K35]	Histone H2B type 1-K [OS=Homo sapiens]	1	1491.72	2232.13	7809.61	4369.54	14209.6	25148.3	29102.5	24864.7	23332.8	24391.7	13028.2	17922.4	17694.7	2929.95	10903.1	4430.55	2549.36	3211.43	7133.8	NoTM	outside	Nucleus;Chromosome	HIST1H2BK	4.75048	2.24807	0.0191029	1.7189	120	0.0765707	1.11594
[R].EESGKPGAHVTVKK.[L]	1xBiotin [K13]	2	3	P22626	P22626 [100-113]	P22626 1xBiotin [K112]	heterogeneous nuclear ribonucleoproteins A2/B1 [OS=Homo sapiens]	1	1692.87	3216.73	3143.32	2146.55	7713.11	4848.32	6127.67	6084.47	6016.65	8154.12	6660.88	4605	1828.05	1829.53	2290.28	3969.58	3198.07	1947.15	3711.68	NoTM	outside	Nucleus;Nucleus, nucleoplasm;Cytoplasm;Cytoplasmic granule;Secreted, extracellular exosome;Component of ribonucleosomes (PubMed:17289661);Not found in the nucleolus (PubMed:17289661);Found in exosomes following sumoylation (PubMed:24356509);[Isoform A2]: Nucleus;Cytoplasm;[Isoform A2]: Nucleus;Cytoplasm	HNRNPA2B1	2.19701	1.13554	0.019411	1.71195	121	0.0771627	1.11259
[RK].LKVIFLENYR.[V]	1xBiotin [K2]	3	2	P11216	P11216 [641-650]	P11216 1xBiotin [K642]	Glycogen phosphorylase, brain form [OS=Homo sapiens]	1	1520.83	2064.65	2692.57	5559.58	7880.17	7074.18	7979.65	3824.59	5852.8	5048.33	3728.37	6213.78	4040.35	3313.42	2784.99	3152.66	1781	3994.71	3819.63	NoTM	outside	NO_DATA	PYGB	2.22298	1.15249	0.0194715	1.7106	122	0.0767688	1.11482
[K].TIGGGDDSFNTFFSETGAGKHVPR.[A]	1xBiotin [K20]	8	3	P68363	P68363 [41-64]	P68363 1xBiotin [K60]	Tubulin alpha-1B chain [OS=Homo sapiens]	1	2723.25	1851.62	1991.43	3636.6	8850.88	15590.9	8889.46	2865.55	12955.6	2766.33	2646.29	3768.54	4128.86	3158.13	1776.15	3928.1	3889.44	1782.39	2286.07	NoTM	outside	Cytoplasm, cytoskeleton	TUBA1B	4.45625	2.15583	0.0203591	1.69124	123	0.0796155	1.099
[R].HQGVMVGMGQKDSYVGDEAQSK.[R]	1xBiotin [K11]; 2xOxidation [M5; M8]	6	9	P60709	P60709 [40-61]	P60709 1xBiotin [K50]	Actin, cytoplasmic 1 [OS=Homo sapiens]	1	2609.14	2102.55	5062.21	4070.57	14410.6	10412.1	8402.79	18708.8	6827.07	18745.2	10316.3	9762.41	12069.2	12589.9	5603.08	7398.11	2999.51	3504.25	2065.56	NoTM	outside	Cytoplasm, cytoskeleton;Nucleus	ACTB	2.95723	1.56425	0.020402	1.69033	124	0.0791399	1.1016
[K].KLVWVPSDK.[S]	1xBiotin [K1]	1	14	P35579-1	P35579-1 [30-38]	P35579-1 1xBiotin [K30]	Myosin-9 [OS=Homo sapiens]	1	1297.7	11985.8	9769.01	13054.1	16499.2	24368.1	22264.8	19274.1	25712	25215.8	29339.2	39019.8	33794.3	16877.7	18249.2	21099.2	17426.2	21709.4	24843.8	NoTM	outside	Cytoplasm, cytoskeleton;Cytoplasm, cell cortex;In retinal pigment epithelial cells, predominantly localized to stress fiber-like structures with some localization to cytoplasmic puncta (PubMed:27331610)	MYH9	1.81367	0.858915	0.0206165	1.68579	125	0.0793321	1.10055
[K].KSADTLWGIQK.[E]	1xBiotin [K1]	3	1	P00338-1	P00338-1 [318-328]	P00338-1 1xBiotin [K318]	L-lactate dehydrogenase A chain [OS=Homo sapiens]	1	1472.76	1908.82	4130.99	2830.37	5043.65	6427.66	5811.38	2315.93	6327.68	6791.61	3092.91	4742.44	2554.93	2004	3802.22	3241.04	2104.71	1939.03	3031.64	NoTM	outside	Cytoplasm	LDHA	1.9484	0.962292	0.0209157	1.67953	126	0.0798448	1.09775
[K].KALAAGGYDVEK.[N]	1xBiotin [K1]	1	4	P16401	P16401 [67-78]	P16401 1xBiotin [K67]	Histone H1.5 [OS=Homo sapiens]	1	1447.72	3383.26	2012.5	2344.13	6234.27	7917.84	11548.4	8727.99	11646.2	10476.9	4902.62	6054.22	4958.88	3928.82	3855.01	3050.83	3180.01	3399.39	1729.02	NoTM	outside	Nucleus;Chromosome;According to PubMed:10997781 associates with actively transcribed chromatin and not heterochromatin	HIST1H1B	3.32052	1.73141	0.0209765	1.67827	127	0.0794465	1.09993
[K].AEMNGSKLGR.[R]	1xBiotin [K7]; 1xOxidation [M3]	1	5	P16422	P16422 [71-80]	P16422 1xBiotin [K77]	Epithelial cell adhesion molecule [OS=Homo sapiens]	1	1304.61	2531.13	3461.56	2111.38	13060.9	8014.47	7390.06	18979.3	7660.48	9439.75	17245.2	7942.2	15163.8	1965.56	2824.93	2532.15	3622.63	2077.36	2043.24	HasTM	outside	Lateral cell membrane;Cell junction, tight junction	EPCAM	3.51248	1.81249	0.0210092	1.67759	128	0.0789486	1.10266
[R].AKHHAISAK.[L]	1xBiotin [K2]	3	2	P27824	P27824 [126-134]	P27824 1xBiotin [K127]	Calnexin [OS=Homo sapiens]	1	1188.63	2185.11	4853.44	2443.55	5849.09	7344.25	7941.25	5890.58	6685.91	4075.72	4048.3	3081.95	6232.87	2162.3	1784.43	2280.01	4010.08	4142.96	3636.23	HasTM	outside	Endoplasmic reticulum membrane;Endoplasmic reticulum;Melanosome;The palmitoylated form preferentially localizes to the perinuclear rough ER (PubMed:22314232)	CANX	2.22889	1.15633	0.0210515	1.67672	129	0.0784945	1.10516
[K].QISGFGKK.[F]	1xBiotin [K7]	16	6	P15529-1	P15529-1 [238-245]	P15529-1 1xBiotin [K244]	Membrane cofactor protein [OS=Homo sapiens]	1	1090.57	79369	66930.7	55736.4	44105	41530.1	40644.3	60927.9	49234.4	52862.4	21029.1	15962.2	20075.6	77251	66305.9	45508.6	32078.4	22459.6	19912.4	HasTM	outside	Cytoplasmic vesicle, secretory vesicle, acrosome inner membrane;Internalized upon binding of Measles virus, Herpesvirus 6 or Neisseria gonorrhoeae, which results in an increased susceptibility of infected cells to complement-mediated injury;In cancer cells or cells infected by Neisseria, shedding leads to a soluble peptide	CD46	0.625034	-0.677994	0.021623	1.66508	130	0.0800052	1.09688
[K].AAGAGKVTK.[S]	1xBiotin [K6]	3	13	P68104	P68104 [445-453]	P68104 1xBiotin [K450]	Elongation factor 1-alpha 1 [OS=Homo sapiens]	1	1028.56	25587.4	21756.1	25039.7	31506.7	38669.5	44235.2	41039	37920.6	43979.6	32143.3	26309.5	36733.3	45238.6	33428.6	26639.3	29905.5	19889.2	20227.2	NoTM	outside	Cytoplasm;Nucleus;Nucleus, nucleolus;Cell membrane;Translocates together with ZPR1 from the cytoplasm to the nucleus and nucleolus after treatment with mitogens (PubMed:8650580);Localization at the cell membrane depends on EEF1A1 phosphorylation status and the presence of PPP1R16B (PubMed:26497934)	EEF1A1	1.58063	0.660503	0.0224203	1.64936	131	0.0823219	1.08448
[R].RPDQQLQGEGKIIDR.[R]	1xBiotin [K11]	4	45	Q8NC51-1	Q8NC51-1 [112-126]	Q8NC51-1 1xBiotin [K122]	Plasminogen activator inhibitor 1 RNA-binding protein [OS=Homo sapiens]	1	1979.01	29667.3	63590.6	71935	169338	289604	381288	223151	284730	320336	248175	279755	277658	55414.1	100493	92306.2	29417.5	84445	79433.1	NoTM	outside	Cytoplasm;Nucleus;Cytoplasm, perinuclear region	SERBP1	5.08636	2.34663	0.0230073	1.63813	132	0.0838373	1.07656
[K].HAAENPGKYNILGTNTIMDK.[M]	1xBiotin [K8]; 1xOxidation [M18]	2	2	Q00839	Q00839 [517-536]	Q00839 1xBiotin [K524]	Heterogeneous nuclear ribonucleoprotein U [OS=Homo sapiens]	1	2429.16	3613.84	6212.07	5125	2496.43	1860.27	2268.04	2216.09	4045.76	3451.79	2919.44	2038.5	2661.97	6815.92	7070.22	7202.71	8191.5	7240.44	6885.58	NoTM	outside	Nucleus;Nucleus matrix;Chromosome;Nucleus speckle;Cytoplasm, cytoskeleton, microtubule organizing center, centrosome;Chromosome, centromere, kinetochore;Cytoplasm, cytoskeleton, spindle;Cytoplasm, cytoskeleton, spindle pole;Midbody;Cytoplasm;Cell surface;Cytoplasmic granule;Localizes in the nucleus during interphase (PubMed:21242313);At metaphase, localizes with mitotic spindle microtubules (MTs)…	HNRNPU	0.4431	-1.1743	0.0232397	1.63377	133	0.0840474	1.07548
[R].QAGGGGGTGSPKLVALR.[L]	1xBiotin [K12]	1	3	Q13751	Q13751 [755-771]	Q13751 1xBiotin [K766]	Laminin subunit beta-3 [OS=Homo sapiens]	1	1751.92	3258.79	3544.01	3165.11	4182.21	5680.95	4849.13	3539.05	5482.41	5612.32	2042.21	3059.85	3122.53	3493.19	3124.47	3866.3	3760.67	2250.6	3616.72	NoTM	outside	Secreted, extracellular space, extracellular matrix, basement membrane	LAMB3	1.47596	0.561658	0.0242718	1.6149	134	0.087125	1.05986
[K].YGQPLPGYTTKGK.[E]	1xBiotin [K]	2	3	P17936	P17936 [268-280]	P17936 1xBiotin [K]	Insulin-like growth factor-binding protein 3 [OS=Homo sapiens]	1	1635.82	3898.19	3330.77	2478.47	5248.14	7789.71	8898.42	6147.03	8027.64	6012.37	3542.86	5391.42	5651.61	2560.59	3944.19	1965.01	3348.93	3567.09	3366.93	NoTM	outside	Secreted	IGFBP3	2.25974	1.17616	0.0243513	1.61348	135	0.0867628	1.06167
[K].VYIYHSSSKGLLR.[Q]	1xBiotin [K9]	2	16	P26006	P26006 [399-411]	P26006 1xBiotin [K407]	Integrin alpha-3 [OS=Homo sapiens]	1	1748.92	51453	67993.9	68725.3	30822.4	38869.1	44902.5	51360.4	57244	43015.6	17399.6	17131.3	12264	49671.4	79840.3	59797.7	32049.7	26637.1	25815.8	HasTM	outside	Cell membrane;Cell membrane;Cell projection, invadopodium membrane;Cell projection, filopodium membrane	ITGA3	0.608985	-0.715522	0.0243615	1.6133	136	0.0861607	1.06469
[R].YLENGKETLQR.[TA]	1xBiotin [K6]	57	7	Q29960; P04439	Q29960 [195-205]; P04439 [195-205]	Q29960 1xBiotin [K200]; P04439 1xBiotin [K200]	HLA class I histocompatibility antigen, Cw-16 alpha chain [OS=Homo sapiens] HLA class I histocompatibility antigen, A-3 alpha chain [OS=Homo sapiens]	1	1576.78	3609.15	2748.94	1922.69	4900.48	7618.2	8677.09	8788.59	7159.19	10737.2	9787.9	7007.14	8500.45	2665.65	1790.14	3156.09	1754.72	2199.79	4087.3	HasTM	outside	NO_DATA	HLA-C	2.55964	1.35594	0.0246136	1.60883	137	0.0864171	1.0634
[K].AFGQAKHQPTAIIAK.[T]	1xBiotin [K6]	2	6	P29401	P29401 [227-241]	P29401 1xBiotin [K232]	Transketolase [OS=Homo sapiens]	1	1806.97	28921	32780.8	32724.3	15751.9	20165.3	25662.7	23052.4	18472.3	22567.2	13103.1	18007.3	16953.5	39479.2	46344.1	37819.4	21719.3	24266.8	24907.4	NoTM	outside	NO_DATA	TKT	0.65215	-0.616725	0.0251533	1.5994	138	0.0876721	1.05714
[R].KASDVHEVR.[K]	1xBiotin [K1]	3	7	P14618	P14618 [247-255]	P14618 1xBiotin [K247]	Pyruvate kinase PKM [OS=Homo sapiens]	1	1266.63	9506.51	9662.22	6323.17	13167.2	13713.5	11663.5	23986.4	14168.3	15586	10314.7	8946.37	10684.4	11504	7683.93	8197.42	7275.4	2924.65	5449.15	NoTM	outside	Cytoplasm;Nucleus;Nuclear translocation is sufficient to induce cell death that is caspase independent, isoform-specific and independent of its enzymatic activity	PKM	1.51202	0.596476	0.0252576	1.59761	139	0.0874023	1.05848
[-G].MQIFVKTLTGK.[T]	1xBiotin [K6]	4	5	P62987	P62987 [1-11]	P62987 1xBiotin [K6]	Ubiquitin-60S ribosomal protein L40 [OS=Homo sapiens]	1	1491.81	3264.9	1992.4	3450.23	6475.74	11710.3	13873.1	9387.71	13500.6	10328.9	6511.2	5374	1854.34	2275.95	2344.11	6273.85	1884.98	3239.12	4782.71	NoTM	outside	[Ubiquitin]: Cytoplasm;Nucleus;[60S ribosomal protein L40]: Cytoplasm;[60S ribosomal protein L40]: Cytoplasm	UBA52	3.68178	1.8804	0.0255851	1.59201	140	0.0879031	1.056
[K].YTQELTLKR.[Q]	1xBiotin [K8]	8	25	P23229-1	P23229-1 [587-595]	P23229-1 1xBiotin [K594]	integrin alpha-6 [OS=Homo sapiens]	1	1377.72	98716.5	69824.5	69251.1	45019.5	47039	44230.9	70880.3	52331.4	56443.1	24545.4	17498.6	16187.4	87758	83282.8	59787.7	36446.3	34721.7	32654.9	HasTM	outside	Cell membrane;Cell membrane	ITGA6	0.573145	-0.803028	0.0256917	1.59021	141	0.0876433	1.05728
[K].GGVVGIKVDK.[G]	1xBiotin [K7]	2	1	P04075	P04075 [102-111]	P04075 1xBiotin [K108]	fructose-bisphosphate aldolase A [OS=Homo sapiens]	1	1197.67	2159.88	3359.62	2256.72	5142.54	9640.8	7077.76	7301.21	7746.28	8253.18	3678.37	3740.24	4183.4	2662.51	3920.58	2008.47	3372.46	2982.23	2739.74	NoTM	outside	Cytoplasm, myofibril, sarcomere, I band;Cytoplasm, myofibril, sarcomere, M line	ALDOA	2.81128	1.49122	0.0259054	1.58661	142	0.0877501	1.05675
[R].INFDKYHPGYFGK.[V]	1xBiotin [K5]	1	13	P46776	P46776 [43-55]	P46776 1xBiotin [K47]	60S ribosomal protein L27a [OS=Homo sapiens]	1	1811.86	37402.2	51752.2	70224.6	11862.2	22218.2	21149.5	9882.8	23350.1	17224	15896.6	24004.3	11162.3	51810	49739.4	60524.6	62668.2	77885.4	70638.6	NoTM	inside	NO_DATA	RPL27A	0.346532	-1.52894	0.0259746	1.58545	143	0.0873692	1.05864
[R].AAFVSEQQQKLSR.[L]	1xBiotin [K10]	2	36	P26006	P26006 [629-641]	P26006 1xBiotin [K638]	Integrin alpha-3 [OS=Homo sapiens]	1	1717.87	104697	80969.8	90978.1	56512.9	62143.8	72289.9	91531.6	73328	75037.6	21685.1	18454.9	37145.6	116349	86510.4	69433	37461.3	30409.6	28392	HasTM	outside	Cell membrane;Cell membrane;Cell projection, invadopodium membrane;Cell projection, filopodium membrane	ITGA3	0.690224	-0.534864	0.0260824	1.58365	144	0.0871224	1.05987
[K].QPAGKVQIVSK.[K]	1xBiotin [K5]	4	4	P27816-1	P27816-1 [987-997]	P27816-1 1xBiotin [K991]	Microtubule-associated protein 4 [OS=Homo sapiens]	1	1380.77	2962.05	3120.04	2642.44	4422.37	4668.46	6513.51	3126.1	4723.94	4511.73	3633.01	2879.55	5246.33	1894.58	2301.24	3271.16	1774.72	2239.22	2160.08	NoTM	outside	Cytoplasm, cytoskeleton	MAP4	1.78856	0.838797	0.0272982	1.56387	145	0.0905549	1.04309
[R].YKSQDPR.[N]	1xBiotin [K2]	2	5	P29401	P29401 [58-64]	P29401 1xBiotin [K59]	Transketolase [OS=Homo sapiens]	1	1119.53	81834	49954.1	47837.6	27172.9	21055.9	18518.7	33427.4	21042	21587.5	25799	21613.3	21341.1	84688	55654.4	44314.7	60678.9	49149.1	37104	NoTM	outside	NO_DATA	TKT	0.371592	-1.42821	0.0290515	1.53683	146	0.0957109	1.01904
[K].SAAQAAAQTNSNAAGKQLR.[K]	1xBiotin [K16]	4	13	Q8NC51-1	Q8NC51-1 [53-71]	Q8NC51-1 1xBiotin [K68]	Plasminogen activator inhibitor 1 RNA-binding protein [OS=Homo sapiens]	1	2084.03	1738.3	3337.65	1787.96	10120.9	18156.7	26859.2	9037.12	17946.2	20846	10678.3	14171.8	17384.5	3083.61	1997.64	5382.23	4172.66	3421.7	3521.76	NoTM	outside	Cytoplasm;Nucleus;Cytoplasm, perinuclear region	SERBP1	8.03287	3.00592	0.0296604	1.52782	147	0.0970519	1.013
[K].NLCYANTINWKK.[L]	1xBiotin [K11]; 1xCarbamidomethyl [C3]	3	7	P00533-1	P00533-1 [468-479]	P00533-1 1xBiotin [K478]	epidermal growth factor receptor [OS=Homo sapiens]	1	1750.84	14808.8	14285.9	14637	8419.32	11781.3	11977	7601.74	10854.9	11938.7	5506.37	3330.67	3186.36	25870.4	14379.9	14004.3	3363.52	8439.74	6606.76	HasTM	outside	Cell membrane;Endoplasmic reticulum membrane ;Single-pass type I membrane protein;Golgi apparatus membrane;Single-pass type I membrane protein;Nucleus membrane;Single-pass type I membrane protein;Endosome;Endosome membrane;Nucleus;Endocytosed upon activation by ligand (PubMed:2790960, PubMed:17182860, PubMed:27153536);Colocalized with GPER1 in the nucleus of estrogen agonist-induced cancer-associ…	EGFR	0.735797	-0.44262	0.0297588	1.52638	148	0.0967161	1.0145
[R].KSTDSPVECMGQEK.[G]	1xBiotin [K1]; 1xCarbamidomethyl [C9]; 1xOxidation [M10]	1	18	P13726-1	P13726-1 [233-246]	P13726-1 1xBiotin [K233]	tissue factor [OS=Homo sapiens]	1	1837.78	49867.8	42399.3	32959.7	28955.4	20768	15845.4	40222.5	14343.3	24179.5	12354.9	9635.62	13543.2	61949.6	25505.3	22206.2	30083.3	13659.4	10173.4	HasTM	outside	[Isoform 1]: Membrane;[Isoform 2]: Secreted;[Isoform 2]: Secreted	F3	0.523601	-0.933461	0.0328126	1.48396	149	0.105925	0.975
[K].KSVQYDDVPEYK.[D]	1xBiotin [K1]	3	13	Q13740-1	Q13740-1 [76-87]	Q13740-1 1xBiotin [K76]	CD166 antigen [OS=Homo sapiens]	1	1696.79	13963.5	13944.5	14180.4	8542.08	12170.7	11074.8	20304.5	10984.2	14134	2025.71	3830.24	2691.5	20908.1	19073.2	16013.6	2415.21	5489.7	5806.03	HasTM	outside	Cell membrane;Cell projection, axon;Cell projection, dendrite;Colocalizes with CD6 and the TCR/CD3 complex at the immunological synapse (PubMed:15294938);[Isoform 3]: Secreted;[Isoform 3]: Secreted	ALCAM	0.755259	-0.404957	0.0332933	1.47764	150	0.106761	0.971589
[R].LAAIVAKQVLLGR.[K]	1xBiotin [K7]	1	3	P40429	P40429 [19-31]	P40429 1xBiotin [K25]	60S ribosomal protein L13a [OS=Homo sapiens]	1	1577.96	3229.09	2936.85	2408.95	3963.15	5875.5	4543.66	3155.34	4404.88	2106.45	3075.41	2263.55	2710.61	2030.98	3378.45	2233.57	2929.89	3525.63	1896.79	NoTM	outside	Cytoplasm	RPL13A	1.67726	0.746104	0.0345653	1.46136	151	0.110105	0.958192
[R].DNIQGITKPAIR.[R]	1xBiotin [K8]	1	8	P62805	P62805 [25-36]	P62805 1xBiotin [K32]	histone H4 [OS=Homo sapiens]	0	1551.83	2652.94	3100.52	3521.39	5710.78	10611.3	12799.4	6617.5	8845.41	7995.21	5242.54	9176.04	4125.67	3459.3	2391.29	4160.25	2897.13	3235.63	3020.62	NoTM	outside	Nucleus;Chromosome	HIST4H4	3.13983	1.65069	0.0350352	1.4555	152	0.110868	0.955194
[K].ADLINNLGTIAKSGTK.[A]	1xBiotin [K12]	4	4	P07900; P08238	P07900 [101-116]; P08238 [96-111]	P07900 1xBiotin [K112]; P08238 1xBiotin [K107]	Heat shock protein HSP 90-alpha [OS=Homo sapiens] Heat shock protein HSP 90-beta [OS=Homo sapiens]	1	1841.98	3752.46	1743.34	1719.15	4326.4	5265.37	6852.39	1868.61	6246.74	4840.74	3322.3	1796.63	3960.96	3999.02	2847.2	2635.78	3229.87	1821.02	2629.46	NoTM	outside	Nucleus;Cytoplasm;Melanosome;Cell membrane	HSP90AA1	2.27918	1.18851	0.0369143	1.43281	153	0.116051	0.935352
[R].TKELGYTVK.[K]	1xBiotin [K2]	1	6	P30533	P30533 [331-339]	P30533 1xBiotin [K332]	alpha-2-macroglobulin receptor-associated protein [OS=Homo sapiens]	1	1264.66	11353	23253.4	21803.8	2690.77	7750.86	7929.4	2504.93	8370.94	8674.05	4175.8	5525.61	4642.56	16992.3	19731.2	22319.3	16109.5	20571.7	21115.3	HasTM	outside	Rough endoplasmic reticulum lumen;Endoplasmic reticulum-Golgi intermediate compartment lumen;Golgi apparatus, cis- Golgi network;Golgi apparatus lumen;Endosome lumen;Cell surface	LRPAP1	0.325669	-1.61852	0.0371055	1.43056	154	0.115895	0.935937
[K].GKGFSVVADTPELQR.[I]	1xBiotin [K2]	3	6	Q14847	Q14847 [95-109]	Q14847 1xBiotin [K96]	LIM and SH3 domain protein 1 [OS=Homo sapiens]	1	1829.92	20084.8	17652.6	17792.8	4458.71	12814.3	12299.9	9075.19	13042.2	13570.9	10477.5	15298.2	20668.8	11543.5	16484.5	17798.4	16843.8	22100	21217.9	NoTM	outside	Cytoplasm, cell cortex;Cytoplasm, cytoskeleton	LASP1	0.532554	-0.909	0.0372044	1.42941	155	0.115454	0.937592
[K].AASGEAKPK.[AV]	1xBiotin [K7]	3	3	P16401; P10412	P16401 [114-122]; P10412 [111-119]	P16401 1xBiotin [K120]; P10412 1xBiotin [K117]	Histone H1.5 [OS=Homo sapiens] Histone H1.4 [OS=Homo sapiens]	0	1084.55	3462.68	2075.42	3942.98	5345.83	6555.57	9272.51	6717.04	7620.48	8372.23	3416.97	5290.75	2983.17	2170.51	1813.8	2470.47	3147.52	3733.32	1721.32	NoTM	outside	Nucleus;Chromosome;According to PubMed:10997781 associates with actively transcribed chromatin and not heterochromatin	HIST1H1B	2.23328	1.15916	0.0390186	1.40873	156	0.120307	0.919708
[R].IMKAQALR.[D]	1xBiotin [K3]; 1xOxidation [M2]	4	8	P07900; P08238	P07900 [613-620]; P08238 [605-612]	P07900 1xBiotin [K615]; P08238 1xBiotin [K607]	Heat shock protein HSP 90-alpha [OS=Homo sapiens] Heat shock protein HSP 90-beta [OS=Homo sapiens]	1	1172.63	2287.01	8595.68	5836.03	18241.6	12327.7	11474.7	22483.4	8572.83	12824.3	13014.8	8690.15	16164.9	15950.7	9723.19	5593.1	3823.96	1755.4	3796.67	NoTM	outside	Nucleus;Cytoplasm;Melanosome;Cell membrane	HSP90AA1	2.51478	1.33043	0.0395185	1.4032	157	0.121073	0.916954
[K].KQAGPASVPLR.[T]	1xBiotin [K1]	1	8	P30101	P30101 [130-140]	P30101 1xBiotin [K130]	Protein disulfide-isomerase A3 [OS=Homo sapiens]	1	1349.74	3407.04	5717.14	6152.73	8959.84	12669.1	17680.6	12788.5	12535.5	15513.8	8792.31	10623.3	9194.91	3534.85	5282.3	4802.26	2707.62	4412.13	3639.45	NoTM	outside	Endoplasmic reticulum;Endoplasmic reticulum lumen;Melanosome	PDIA3	2.57314	1.36353	0.0397776	1.40036	158	0.121095	0.916873
[K].AVEHINKTIAPALVSK.[K]	1xBiotin [K7]	1	29	P06733-1	P06733-1 [65-80]	P06733-1 1xBiotin [K71]	alpha-enolase [OS=Homo sapiens]	1	1917.06	36122	44482.1	42425.2	61401.8	120001	122514	77694.5	86142.2	87178.3	82399.1	108669	75883.9	52209.4	52158.3	40106.5	43301.2	50348.7	54762.3	NoTM	outside	Cytoplasm;Cell membrane;Cytoplasm, myofibril, sarcomere, M line;ENO1 is localized to the M line;[Isoform MBP-1]: Nucleus;[Isoform MBP-1]: Nucleus	ENO1	2.47028	1.30468	0.0400849	1.39702	159	0.121263	0.916272
[R].GDGTGGKSIYGER.[F]	1xBiotin [K7]	1	3	P23284	P23284 [110-122]	P23284 1xBiotin [K116]	peptidyl-prolyl cis-trans isomerase B [OS=Homo sapiens]	1	1522.7	2687.7	2601.47	3749.02	4133.55	4151.92	5065.29	6809.26	7505.81	6730.18	3889.59	4925.52	1778.54	10826.9	3910.13	3531.07	2657.1	1842.79	3344.47	HasTM	outside	Endoplasmic reticulum lumen;Melanosome	PPIB	1.47715	0.562816	0.0402351	1.3954	160	0.120957	0.91737
[K].FHPLHSKIIIIK.[K]	1xBiotin [K7]	2	19	P17936	P17936 [165-176]	P17936 1xBiotin [K171]	Insulin-like growth factor-binding protein 3 [OS=Homo sapiens]	1	1671.98	24027.5	24275	46481	50504.4	86899.9	91794.2	23790.8	95557.4	67938.4	41490.7	47296.1	39867	29540.2	31403.4	29695.5	19420	35640.6	18724.9	NoTM	outside	Secreted	IGFBP3	2.41813	1.27389	0.0404691	1.39288	161	0.120905	0.917557
[R].EDSQRPGAHLTVKK.[I]	1xBiotin [K]	4	5	P09651-1	P09651-1 [93-106]	P09651-1 1xBiotin [K]	Heterogeneous nuclear ribonucleoprotein A1 [OS=Homo sapiens]	1	1791.92	3108.59	6089.52	5278.78	8204.57	8190.93	12080.9	9204.39	9016.29	10411.1	12426	7932.28	8976.62	5927.77	4779.7	2589.03	2911.33	4571.03	2959.02	NoTM	outside	Nucleus;Cytoplasm;Shuttles continuously between the nucleus and the cytoplasm along with mRNA;Component of ribonucleosomes (PubMed:17289661);Cytoplasm;Cytoplasm	HNRNPA1	1.96702	0.976013	0.0411087	1.38607	162	0.122057	0.913436
[K].LDVQFSGLTKGDAVR.[D]	1xBiotin [K10]	2	22	P21333	P21333 [907-921]	P21333 1xBiotin [K916]	Filamin-A [OS=Homo sapiens]	1	1831.94	15075.3	22233	17686.8	24875.2	28727.5	36062.2	31319.1	29534.2	31092.2	36958.5	40385.4	27509.5	28576.6	34195.8	21461.3	22295.3	29172.3	24582.8	NoTM	outside	Cytoplasm, cell cortex;Cytoplasm, cytoskeleton;Perikaryon;Cell projection, growth cone;Following SEMA3A stimulation of DRG neurons, colocalizes with F-actin (By similarity)	FLNA	1.63042	0.705243	0.0411381	1.38576	163	0.121395	0.915798
[K].STGGKAPR.[K]	1xBiotin [K5]	5	5	P84243	P84243 [11-18]	P84243 1xBiotin [K15]	histone H3.3 [OS=Homo sapiens]	1	999.504	1796.47	3381.16	3986.99	4896.83	9602.51	9904.25	2082.13	9898.83	11197.6	6699.31	7964.37	7187.66	3007.4	2923.8	2659.48	3721.19	3586.65	2988.3	NoTM	inside	Nucleus;Chromosome	H3F3B	2.6628	1.41295	0.0438383	1.35815	164	0.128575	0.890845
[K].GKLDVQFSGLTKGDAVR.[D]	1xBiotin [K12]	2	3	P21333	P21333 [905-921]	P21333 1xBiotin [K916]	Filamin-A [OS=Homo sapiens]	2	2017.05	2987.92	5601.72	3668.19	9503.5	5827.7	8889.43	8249.49	8037.82	7276.58	15577.8	10034.5	6344.51	10716.8	5900.82	7028.9	2216.23	5680.04	4569.87	NoTM	outside	Cytoplasm, cell cortex;Cytoplasm, cytoskeleton;Perikaryon;Cell projection, growth cone;Following SEMA3A stimulation of DRG neurons, colocalizes with F-actin (By similarity)	FLNA	1.97593	0.982533	0.044614	1.35053	165	0.130057	0.885868
[K].LGLKSLVSK.[G]	1xBiotin [K4]	5	12	P16401; P10412	P16401 [85-93]; P10412 [82-90]	P16401 1xBiotin [K88]; P10412 1xBiotin [K85]	Histone H1.5 [OS=Homo sapiens] Histone H1.4 [OS=Homo sapiens]	1	1170.69	3684.48	9095.63	10833.1	13688.7	30195.7	28044.8	25514.9	30685	29512.1	17353.1	19723.5	21702.6	3092.86	11618.8	8449.31	2248.61	6002.18	7485.76	NoTM	outside	Nucleus;Chromosome;According to PubMed:10997781 associates with actively transcribed chromatin and not heterochromatin	HIST1H1B	3.04614	1.60698	0.0454432	1.34253	166	0.131676	0.880494
[R].DLYDAGVKR.[K]	1xBiotin [K8]	2	3	P07355	P07355 [197-205]	P07355 1xBiotin [K204]	Annexin A2 [OS=Homo sapiens]	1	1262.62	2493.74	4893.64	6158.76	6872.57	11194.4	12133.4	10621.6	7295.66	10205.5	2030.8	4579.28	2202.12	3550.01	5374.82	3767.42	1996.29	2088.71	2854.85	NoTM	outside	Secreted, extracellular space, extracellular matrix, basement membrane;Melanosome;Identified by mass spectrometry in melanosome fractions from stage I to stage IV;Translocated from the cytoplasm to the cell surface through a Golgi-independent mechanism	ANXA2	2.22944	1.15668	0.0461354	1.33597	167	0.132881	0.876537
[R].GLDSKASLILR.[S]	1xBiotin [K5]	8	13	P23229-1	P23229-1 [982-992]	P23229-1 1xBiotin [K986]	integrin alpha-6 [OS=Homo sapiens]	1	1398.78	27636.1	37349.7	25201.6	20499	17303.7	19584.7	29201.3	22329.2	19621.5	10360.1	7739.51	10270.3	29411.7	24160.2	25635.3	13404.1	10732.4	10652.7	HasTM	outside	Cell membrane;Cell membrane	ITGA6	0.636313	-0.652192	0.0461947	1.33541	168	0.13226	0.878572
[K].KDVLETFTVK.[S]	1xBiotin [K1]	1	20	P21926	P21926 [170-179]	P21926 1xBiotin [K170]	CD9 antigen [OS=Homo sapiens]	1	1405.74	27855.8	33729.5	28778	16585.2	22299.6	25059	34671.6	28181.7	29418.2	7127.98	9428	6698.34	35534.5	33414.3	28307	11487	10749.9	15210.2	HasTM	outside	Cell membrane;Membrane;Secreted, extracellular exosome;Accumulates in the adhesion area between the sperm and egg following interaction between IZUMO1 and its receptor IZUMO1R/JUNO	CD9	0.707631	-0.498931	0.0464258	1.33324	169	0.132135	0.878983
[R].EVALDLSQHKGVAVR.[R]	1xBiotin [K10]	2	1	O00391	O00391 [202-216]	O00391 1xBiotin [K211]	Sulfhydryl oxidase 1 [OS=Homo sapiens]	1	1847.98	12818.8	6781.81	6412.19	3732.65	2004.68	2094.45	3661.53	3044.41	2917.91	1802.3	2773.69	1983.23	10747.7	8752.73	8023.74	7917.3	8079.41	10004.3	HasTM	outside	[Isoform 1]: Golgi apparatus membrane;Secreted;[Isoform 2]: Secreted;[Isoform 2]: Secreted	QSOX1	0.301074	-1.73181	0.0479698	1.31903	170	0.135726	0.867336
[R].LKVGLQVVAVK.[A]	1xBiotin [K2]	1	4	P10809	P10809 [291-301]	P10809 1xBiotin [K292]	60 kDa heat shock protein, mitochondrial [OS=Homo sapiens]	1	1379.84	2330.01	3193.99	4732.05	5208.85	6965.02	5493.28	5781.15	5611.12	6886.13	3566.77	3986.4	4004.43	2573.52	8100.98	6674.22	2327.88	4295.33	2982.82	NoTM	outside	Mitochondrion matrix	HSPD1	1.72261	0.784594	0.0498148	1.30264	171	0.140122	0.853493
[K].GTLLGESLKLK.[V]	1xBiotin [K]	2	17	O75663	O75663 [118-128]	O75663 1xBiotin [K]	TIP41-like protein [OS=Homo sapiens]	1	1384.79	20543.8	22640.7	19997.6	14458.1	16577.8	19107.7	20437	17656.1	15697.5	23748.6	15449	11057.2	27486.3	26471.9	20779.7	31442.6	28671.1	22581.3	NoTM	outside	Cytoplasm	TIPRL	0.793636	-0.33345	0.0501415	1.2998	172	0.140221	0.853186
[R].LNVFAKPEATEVSPNK.[G]	1xBiotin [K6]	1	14	P50895	P50895 [141-156]	P50895 1xBiotin [K146]	Basal cell adhesion molecule [OS=Homo sapiens]	0	1970.01	27820.7	24097.3	21252.7	20664.1	12960.1	14150.1	30461.7	15913	17130.3	15570.8	3764.54	5857.95	55521.1	24718.6	23916.9	7465.32	7069.11	6892.24	HasTM	outside	Membrane;Single-pass type I membrane protein	BCAM	0.652915	-0.615034	0.0504048	1.29753	173	0.140143	0.853429
[K].SGSLKLR.[I]	1xBiotin [K5]	2	3	O60583	O60583 [502-508]	O60583 1xBiotin [K506]	Cyclin-T2 [OS=Homo sapiens]	1	986.545	7997.62	15215.9	23795.9	4110.42	3090.97	1787.99	3862.75	2743.8	5040.68	2911.53	2901.09	9970.97	23184.5	36849.8	36348.3	25814.3	23954.5	60383	NoTM	outside	Cytoplasm, perinuclear region;Nucleus	CCNT2	0.191225	-2.38666	0.0515927	1.28741	174	0.142621	0.845816
[K].KLEDGPK.[F]	1xBiotin [K1]	3	4	P68104	P68104 [386-392]	P68104 1xBiotin [K386]	Elongation factor 1-alpha 1 [OS=Homo sapiens]	1	1012.51	11152	14198.1	13411	16357.5	24002	28681.5	22904.3	26945.1	26254.5	13120.8	12274.4	15583.6	25912	16128.8	12752.5	9150.77	10313	7037.23	NoTM	outside	Cytoplasm;Nucleus;Nucleus, nucleolus;Cell membrane;Translocates together with ZPR1 from the cytoplasm to the nucleus and nucleolus after treatment with mitogens (PubMed:8650580);Localization at the cell membrane depends on EEF1A1 phosphorylation status and the presence of PPP1R16B (PubMed:26497934)	EEF1A1	1.78119	0.832844	0.0527952	1.27741	175	0.145111	0.838299
[K].FQDTDGKHLLPK.[I]	1xBiotin [K7]	2	7	P52209	P52209 [242-253]	P52209 1xBiotin [K248]	6-phosphogluconate dehydrogenase, decarboxylating [OS=Homo sapiens]	1	1624.82	14045.5	20182.3	15657.4	20091.4	28054.4	28440.1	25324.6	23034.5	28686.5	31403.5	28534.3	26804.7	17306	17647	15423.4	13154.1	22323.9	16517.8	NoTM	outside	Cytoplasm	PGD	1.53524	0.618466	0.0534774	1.27183	176	0.146151	0.835198
[K].AAGAGAAKR.[K]	1xBiotin [K8]	1	3	P16401	P16401 [28-36]	P16401 1xBiotin [K35]	Histone H1.5 [OS=Homo sapiens]	1	998.52	2139.17	3586.04	2289.22	3848.93	8114.12	6901.79	9173.14	7562.08	6651.99	5741.82	2808.89	2345.19	2956.55	2500.1	2649.66	2352.39	2985.72	1798.55	NoTM	outside	Nucleus;Chromosome;According to PubMed:10997781 associates with actively transcribed chromatin and not heterochromatin	HIST1H1B	2.35386	1.23503	0.055219	1.25791	177	0.150058	0.82374
[R].IKTSDVTSTK.[G]	1xBiotin [K2]	1	8	P26196	P26196 [85-94]	P26196 1xBiotin [K86]	Probable ATP-dependent RNA helicase DDX6 [OS=Homo sapiens]	1	1305.67	8872.14	10474.8	7937.53	7017.75	6615.78	7446.92	5039.12	9083.56	10107.5	5646.77	3316.86	7440.92	16799.4	14825.6	9222.2	9809.6	13900.7	11273.7	NoTM	outside	Cytoplasm, P-body;Cytoplasm;Nucleus	DDX6	0.772618	-0.372172	0.0566529	1.24678	178	0.15309	0.815053
[R].ILLQSKNAGAVIGK.[G]	1xBiotin [K6]	3	10	P61978	P61978 [47-60]	P61978 1xBiotin [K52]	Heterogeneous nuclear ribonucleoprotein K [OS=Homo sapiens]	1	1637.94	2765.13	4364.13	5990.8	6057.44	8184.92	8221.85	8677.87	9248.42	6226.62	8536.39	6931.73	6545.82	2446.09	8179.77	5004.35	2392.7	4938.52	5436.84	NoTM	outside	Cytoplasm;Nucleus, nucleoplasm;Cell projection, podosome;In case of ASFV infection, there is a shift in the localization which becomes predominantly nuclear (PubMed:18775702)	HNRNPK	1.7122	0.775854	0.056834	1.24539	179	0.152721	0.8161
[K].VTQQGLKMVVPGLDGAQIPR.[D]	1xBiotin [K7]; 1xOxidation [M8]	1	2	P49327	P49327 [1152-1171]	P49327 1xBiotin [K1158]	Fatty acid synthase [OS=Homo sapiens]	1	2349.24	3419.45	3409.86	2777.77	7931.97	5800.49	4322.78	5692.89	2607.69	4824.9	3346.55	7301.33	2645.99	1954.05	3093.48	3906.83	3738.18	2215.73	1823.11	NoTM	outside	Cytoplasm;Melanosome	FASN	1.87937	0.910248	0.0579051	1.23728	180	0.154735	0.810411
[R].NGNPAPKITWYR.[N]	1xBiotin [K7]	1	15	P50895	P50895 [176-187]	P50895 1xBiotin [K182]	Basal cell adhesion molecule [OS=Homo sapiens]	1	1642.82	17050.8	21488.8	22046.1	12993.9	17362.8	13903.2	15062.2	24634.2	20989.9	7760.81	10026.6	7710.7	15075.4	22377.8	19481.2	3644.58	9921.68	10304.2	HasTM	outside	Membrane;Single-pass type I membrane protein	BCAM	0.730533	-0.452979	0.0579524	1.23693	181	0.154006	0.812462
[K].ETQKSIYYITGESK.[E]	1xBiotin [K4]	1	11	P08238	P08238 [478-491]	P08238 1xBiotin [K481]	Heat shock protein HSP 90-beta [OS=Homo sapiens]	1	1872.9	1841.48	5461.72	7344.9	9172.11	10773.3	8411.68	11611.1	8375.13	10765.2	9473.34	9685.82	10790.1	10399	7297	9499.04	6672.65	7753.1	3962.64	NoTM	outside	Cytoplasm;Melanosome;Nucleus;Secreted;Cell membrane;Translocates with BIRC2 from the nucleus to the cytoplasm during differentiation (PubMed:18239673);Secreted when associated with TGFB1 processed form (LAP) (PubMed:20599762)	HSP90AB1	1.93589	0.952997	0.0601322	1.22089	182	0.158921	0.79882
[R].EMLQQSKILK.[VY]	1xBiotin [K7]	4	5	P07900; P08238	P07900 [401-410]; P08238 [393-402]	P07900 1xBiotin [K407]; P08238 1xBiotin [K399]	Heat shock protein HSP 90-alpha [OS=Homo sapiens] Heat shock protein HSP 90-beta [OS=Homo sapiens]	1	1443.77	3235.37	3036.98	3268.16	4055.4	7592.64	5854.32	3027.25	7513.97	6013.77	2630.06	3249.83	2125.98	5550.37	9040.11	3531.21	3271.57	3878.02	2786.36	NoTM	outside	Nucleus;Cytoplasm;Melanosome;Cell membrane	HSP90AA1	1.83453	0.87541	0.0605261	1.21806	183	0.159088	0.798364
[K].KELLLPGNNR.[K]	1xBiotin [K1]	1	1	P05362	P05362 [67-76]	P05362 1xBiotin [K67]	Intercellular adhesion molecule 1 [OS=Homo sapiens]	1	1379.75	3971.27	1943.56	2604.25	9403.96	8569.46	4095.11	10569.3	13362.2	12548.3	6903.25	13207.9	15207.9	4106.69	1958.59	2632.29	1824.79	3121.77	1732.39	HasTM	outside	Membrane;Single-pass type I membrane protein	ICAM1	2.59048	1.37322	0.0615634	1.21068	184	0.160935	0.79335
[R].VEYAKSGR.[A]	1xBiotin [K5]	1	2	P09874	P09874 [11-18]	P09874 1xBiotin [K15]	Poly [ADP-ribose] polymerase 1 [OS=Homo sapiens]	1	1135.56	3919.24	3013.29	2188.87	4135.79	5088.92	6585.17	5156.4	6420.25	6237.33	5348.57	5537.6	5736.38	3854.5	3895.14	2473.34	2709.32	1865.77	4170.81	NoTM	outside	Nucleus;Nucleus, nucleolus;Chromosome	PARP1	1.73327	0.7935	0.0625692	1.20364	185	0.16268	0.788666
[R].SKYKPTPIPIK.[V]	1xBiotin [K2]	1	14	Q14126	Q14126 [366-376]	Q14126 1xBiotin [K367]	Desmoglein-2 [OS=Homo sapiens]	1	1497.85	15516.9	19585	24597	29603.6	36612	54984.4	60395.4	55910.6	62931	60293.9	53328.5	68322.4	25845.7	24144.7	19402.6	3754.24	8441.52	9363.87	HasTM	outside	Cell membrane;Single-pass type I membrane protein;Cell junction, desmosome	DSG2	2.03019	1.02161	0.0626881	1.20282	186	0.162113	0.790183
[K].NNIKLYVR.[R]	1xBiotin [K4]	4	1	P07900; P08238	P07900 [359-366]; P08238 [351-358]	P07900 1xBiotin [K362]; P08238 1xBiotin [K354]	Heat shock protein HSP 90-alpha [OS=Homo sapiens] Heat shock protein HSP 90-beta [OS=Homo sapiens]	1	1245.68	4061.35	4540.96	4767.63	5209.51	8452.62	7011.15	5213.37	8793.32	12353.8	4965.75	6190	6368.19	2790.81	6263.19	6138.67	2096.6	3628.68	3934.89	NoTM	outside	Nucleus;Cytoplasm;Melanosome;Cell membrane	HSP90AA1	1.54625	0.628774	0.0644333	1.19089	187	0.165735	0.780586
[K].FLSGKGLVIYPK.[I]	1xBiotin [K5]	1	3	P98172	P98172 [44-55]	P98172 1xBiotin [K48]	ephrin-B1 [OS=Homo sapiens]	1	1547.87	2935	3362.42	2808.73	3439.41	4944	5491.65	4168.35	5836.25	3964.14	2393.06	4077.56	2193.27	2475.99	3198.1	2426.3	2728.44	2661.28	2639.27	HasTM	outside	Cell membrane;Membrane raft;[Ephrin-B1 C-terminal fragment]: Cell membrane;[Ephrin-B1 intracellular domain]: Nucleus;[Ephrin-B1 C-terminal fragment]: Cell membrane;[Ephrin-B1 intracellular domain]: Nucleus;[Ephrin-B1 intracellular domain]: Nucleus	EFNB1	1.5237	0.607581	0.0668031	1.1752	188	0.170917	0.767216
[R].GTAKANVGAGK.[K]	1xBiotin [K4]	4	3	P62847-4	P62847-4 [119-129]	P62847-4 1xBiotin [K122]	Isoform 4 of 40S ribosomal protein S24 [OS=Homo sapiens]	1	1199.62	4071.85	10198.4	8616.27	1956.17	3620.57	3074.12	1898.85	3185.38	3709.05	3281.36	2220.53	3883.68	10046.6	7327.83	6815.74	10860	4820.93	4447.08	NoTM	outside	NO_DATA	RPS24	0.377989	-1.40358	0.0669852	1.17402	189	0.170475	0.768338
[K].VGEFSGANKEK.[L]	1xBiotin [K9]	2	4	P10599-1	P10599-1 [86-96]	P10599-1 1xBiotin [K94]	thioredoxin [OS=Homo sapiens]	1	1391.66	3176.5	2630.93	2203.09	3581.76	6443.49	8186.8	2326.73	4242.57	5827.14	4045.28	2885.05	2706.87	3678.44	2062.31	1721.09	3484.62	3965.5	4068.38	NoTM	inside	Nucleus;Cytoplasm;Secreted;Predominantly in the cytoplasm in non irradiated cells (PubMed:11118054);Radiation induces translocation of TRX from the cytoplasm to the nucleus (PubMed:11118054);Secreted by a leaderless secretory pathway (PubMed:1332947)	TXN	2.27351	1.18492	0.068268	1.16578	190	0.172826	0.762391
[K].ISKGANPVEIR.[R]	1xBiotin [K3]	2	23	P10809	P10809 [131-141]	P10809 1xBiotin [K133]	60 kDa heat shock protein, mitochondrial [OS=Homo sapiens]	1	1409.76	34459.9	48562.5	54968	23749.7	27762.7	35116.5	24562.5	25523.9	27531.4	23850.9	26194.8	28557.8	79123.5	61817.2	47074.9	58486.5	60360.3	45003.4	NoTM	outside	Mitochondrion matrix	HSPD1	0.62779	-0.671646	0.0684283	1.16476	191	0.172325	0.763653
[K].VVKQASEGPLK.[G]	1xBiotin [K3]	2	18	P04406-1	P04406-1 [261-271]	P04406-1 1xBiotin [K263]	glyceraldehyde-3-phosphate dehydrogenase [OS=Homo sapiens]	1	1381.75	21798.3	16942.8	24660.3	24568.8	29903.5	31638.4	34621.4	33458.3	33989	19897.9	26655	29818.7	25542.6	22253.6	21828	23132.2	16664.7	17025.1	NoTM	outside	Cytoplasm, cytosol;Nucleus;Cytoplasm, perinuclear region;Membrane;Cytoplasm, cytoskeleton;Postnuclear and Perinuclear regions	GAPDH	1.35818	0.441677	0.0709555	1.14901	192	0.177758	0.75017
[K].GEVFNELVGKQR.[I]	1xBiotin [K10]	5	20	P05556-1	P05556-1 [229-240]	P05556-1 1xBiotin [K238]	Integrin beta-1 [OS=Homo sapiens]	1	1601.81	26520	30073.8	32459.4	16105.7	23051.4	25640.6	25605.7	26824.5	26134.1	9007.71	8361.53	5714.5	36593.9	34569.2	27625.9	16341.7	19396.5	15155.2	HasTM	outside	Cell membrane;Cell projection, invadopodium membrane;Cell projection, ruffle membrane;Recycling endosome;Melanosome;Cleavage furrow;Cell projection, lamellipodium;Cell projection, ruffle;Cell junction, focal adhesion;Cell surface;Highly enriched in stage I melanosomes;Located on plasma membrane of neuroblastoma NMB7 cells;In a lung cancer cell line, in prometaphase and metaphase, localizes diffus…	ITGB1	0.72763	-0.458724	0.0720723	1.14223	193	0.179621	0.745644
[R].LAPVYQKLLER.[M]	1xBiotin [K7]	1	8	Q15582	Q15582 [670-680]	Q15582 1xBiotin [K676]	Transforming growth factor-beta-induced protein ig-h3 [OS=Homo sapiens]	1	1555.87	7363.43	5338.3	5934.94	7555.88	8450.65	10685.1	8622.03	10122.9	10088.3	7680.33	6298.98	8044.79	8334.57	8949.96	7270.41	3197.07	4079.2	4128.36	HasTM	outside	Secreted;Secreted, extracellular space, extracellular matrix	TGFBI	1.43221	0.518242	0.0724413	1.14001	194	0.17961	0.745671
[K].AAWGKVGAHAGEYGAEALER.[M]	1xBiotin [K5]	1	1	P69905	P69905 [13-32]	P69905 1xBiotin [K17]	Hemoglobin subunit alpha [OS=Homo sapiens]	1	2269.08	3613.56	2424.69	6575.32	6024.9	9464.84	8828.12	3307.53	7841.2	5674.49	2065.29	1821.15	3200.21	2981.93	1836.66	6954.89	2746.67	5487.75	9554.79	NoTM	outside	NO_DATA	HBA2	1.92791	0.94704	0.0742416	1.12935	195	0.183129	0.737242
[R].GHEKFGSCQQGVAATFTK.[D]	1xBiotin [K4]; 1xCarbamidomethyl [C8]	8	1	P23229-1	P23229-1 [181-198]	P23229-1 1xBiotin [K184]	integrin alpha-6 [OS=Homo sapiens]	1	2179.01	3864.54	6829.62	3624.05	2327.28	2403.91	2142.46	3060.29	3327.11	3937.14	6075.32	7548.03	9355.66	1892.95	8177.56	3946.3	2084.51	3853.13	3573.35	HasTM	outside	Cell membrane;Cell membrane	ITGA6	0.480063	-1.0587	0.0743064	1.12897	196	0.182354	0.739085
[R].LNQLKPGLQYK.[L]	1xBiotin [K5]	7	7	Q12906-1	Q12906-1 [409-419]	Q12906-1 1xBiotin [K413]	Interleukin enhancer-binding factor 3 [OS=Homo sapiens]	0	1527.84	3963.93	2455.31	4142.99	4295.55	7269.36	6398.75	6133.39	7999.8	6551.62	7502.95	10383.5	8169.72	2545.54	2681.06	3512.96	3764.27	2420.08	2876.06	NoTM	outside	Nucleus, nucleolus;Cytoplasm;Nucleus;The unphosphorylated form is retained in the nucleus by ILF2;Phosphorylation at Thr-188 and Thr-315 causes the dissociation of ILF2 from the ILF2-ILF3 complex resulting in a cytoplasmic sequestration of ILF3;Localized in cytoplasmic mRNP granules containing untranslated mRNAs	ILF3	1.70075	0.766167	0.0751706	1.12395	197	0.183538	0.736273
[R].LKLEPHEGLLLR.[F]	1xBiotin [K2]	4	22	P08195	P08195 [614-625]	P08195 1xBiotin [K615]	4F2 cell-surface antigen heavy chain [OS=Homo sapiens]	1	1643.93	69012.5	80319	89074	55356.3	69518.3	62861.6	54499.9	65135.5	70767.9	70896.4	61663.2	50178.6	94125.3	95757.9	69451.2	37663.1	40009.3	30517.9	HasTM	outside	Apical cell membrane;Cell membrane;Cell junction;Lysosome membrane;Melanosome;Localized at the plasma membrane when associated with SLC7A5 or SLC7A8 (PubMed:9751058, PubMed:11311135);Localized to the apical membrane of placental syncytiotrophoblastic cells (PubMed:11742812);Recruited to lysosomes by LAPTM4B (PubMed:25998567);Located selectively at cell- cell adhesion sites (By similarity);Colocal…	SLC3A2	0.787466	-0.344711	0.0761687	1.11822	198	0.185036	0.732744
[R].INVYYNEATGGKYVPR.[A]	1xBiotin [K12]	1	5	P68371	P68371 [47-62]	P68371 1xBiotin [K58]	Tubulin beta-4B chain [OS=Homo sapiens]	1	2070.01	2000.87	4150.99	2133.44	3917.2	4813.9	5616.78	3249.72	4577.11	6459.87	7337.4	6999.34	7478.73	5496.95	5300.29	3460.86	2567.09	5542.2	6906.47	NoTM	outside	Cytoplasm, cytoskeleton	TUBB4B	1.73173	0.792211	0.0765265	1.11619	199	0.184971	0.732896
[K].TKTHYHAMHADCLQELR.[R]	1xBiotin [K2]; 1xCarbamidomethyl [C12]; 1xOxidation [M8]	1	5	Q29983	Q29983 [176-192]	Q29983 1xBiotin [K177]	MHC class I polypeptide-related sequence A [OS=Homo sapiens]	1	2353.06	2954.41	3533.76	3542.56	16847.8	8248.51	7002.61	10986.2	6376.29	8487.16	18898.7	7371.75	14184.8	4018.33	2482.97	2158.23	3182.24	3092.29	1930.23	HasTM	outside	Cell membrane;Cytoplasm;Infection with human adenovirus 5 suppresses cell surface expression due to the adenoviral E3-19K protein which causes retention in the endoplasmic reticulum	MICA	3.20005	1.6781	0.0766501	1.11549	200	0.184343	0.734372
[K].WTLLQEQGTKTVR.[Q]	1xBiotin [K10]	4	7	P04259; P02538; P13647	P04259 [195-207]; P02538 [195-207]; P13647 [200-212]	P04259 1xBiotin [K204]; P02538 1xBiotin [K204]; P13647 1xBiotin [K209]	keratin, type II cytoskeletal 6B [OS=Homo sapiens] Keratin, type II cytoskeletal 6A [OS=Homo sapiens] keratin, type II cytoskeletal 5 [OS=Homo sapiens]	1	1785.93	2643.94	3725.04	5249.78	4979.41	7683.86	9191.9	7645.44	10214.8	7193.02	2836.23	4130.15	2473.22	7505.01	4521.16	3541.88	3432.54	3621.41	4005.09	NoTM	outside	NO_DATA	KRT6B	1.88103	0.911519	0.0776367	1.10993	201	0.185787	0.730984
[K].FHGTVKAENGK.[L]	1xBiotin [K6]	2	6	P04406-1	P04406-1 [56-66]	P04406-1 1xBiotin [K61]	glyceraldehyde-3-phosphate dehydrogenase [OS=Homo sapiens]	1	1413.69	16082.9	8195.37	3391.85	18421.3	15929	22618.1	24086.8	20442.2	20779.4	15002.7	11938.7	16726.4	13310	12846.3	9008.47	3171.8	2959.1	1931.21	NoTM	outside	Cytoplasm, cytosol;Nucleus;Cytoplasm, perinuclear region;Membrane;Cytoplasm, cytoskeleton;Postnuclear and Perinuclear regions	GAPDH	2.05884	1.04183	0.0798287	1.09784	202	0.190087	0.721047
[R].IPTPVIHTKH.[-]	1xBiotin [K9]	2	2	P12532	P12532 [408-417]	P12532 1xBiotin [K416]	Creatine kinase U-type, mitochondrial [OS=Homo sapiens]	1	1368.75	10334.6	11369.3	11770.9	11966.9	17414.8	18467.9	14883.5	17995.2	19622.1	14891.1	18636	16863.9	11935.9	14542.2	12333.4	8883.99	10924.5	12010.1	NoTM	outside	Mitochondrion inner membrane;Peripheral membrane protein;Intermembrane side	CKMT1B	1.42942	0.515431	0.0805513	1.09393	203	0.190863	0.719279
[R].VAPEEHPVLLTEAPLNPKANR.[E]	1xBiotin [K18]	2	13	P60709	P60709 [96-116]	P60709 1xBiotin [K113]	Actin, cytoplasmic 1 [OS=Homo sapiens]	1	2521.32	3481.31	18594.6	17873.7	20787	28558.4	30298.2	25760.1	31621.1	24461.4	13021.1	17353.6	16428.1	19741.6	17031.9	17722.1	2595.12	11459.3	11871.7	NoTM	outside	Cytoplasm, cytoskeleton;Nucleus	ACTB	1.9936	0.995375	0.0819285	1.08657	204	0.193175	0.71405
[K].FVLSSGKFYGDEEKDK.[G]	1xBiotin [K7]	1	1	P27797	P27797 [49-64]	P27797 1xBiotin [K55]	Calreticulin [OS=Homo sapiens]	2	2074.98	2075.19	3321.95	2109.58	3067.01	3935.4	4218.03	1863.32	3738.45	6425.79	2843.42	3749.44	2784.61	3577.85	3011.02	3014.14	3960.16	1817.49	4118.15	NoTM	outside	Endoplasmic reticulum lumen;Cytoplasm, cytosol;Secreted, extracellular space, extracellular matrix;Cell surface;Sarcoplasmic reticulum lumen;Associated with the lytic granules in the cytolytic T-lymphocytes	CALR	1.49472	0.579873	0.0823351	1.08442	205	0.193186	0.714024
[K].NVGKVLLVPGPEK.[E]	1xBiotin [K4]	3	5	Q99536	Q99536 [379-391]	Q99536 1xBiotin [K382]	Synaptic vesicle membrane protein VAT-1 homolog [OS=Homo sapiens]	1	1575.89	1738.22	3368.34	4096.52	3965.55	6561.72	5894.53	6001.1	4653.6	5091.98	5791.05	4119.12	2530.45	5453.78	6013.01	5969.73	3145.68	4721.57	5786.25	NoTM	outside	Cytoplasm;Mitochondrion outer membrane;Peripheral membrane protein	VAT1	1.78438	0.835424	0.0826939	1.08253	206	0.193086	0.714249
[R].ALQASALKAWGGK.[K]	1xBiotin [K8]	2	2	P04075	P04075 [305-317]	P04075 1xBiotin [K312]	fructose-bisphosphate aldolase A [OS=Homo sapiens]	1	1526.81	3486.15	2205.11	3016.2	3653.47	5623	4212.76	3144.02	4147.52	5379.54	2200.48	2964.65	4013.23	1840.36	1848.69	2239.61	2483.94	2133.92	2428.94	NoTM	outside	Cytoplasm, myofibril, sarcomere, I band;Cytoplasm, myofibril, sarcomere, M line	ALDOA	1.54916	0.631487	0.0836136	1.07772	207	0.194291	0.711548
[K].LDKSQIHDIVLVGGSTR.[I]	1xBiotin [K3]	2	3	P11142-1	P11142-1 [326-342]	P11142-1 1xBiotin [K328]	Heat shock cognate 71 kDa protein [OS=Homo sapiens]	1	2064.09	2041.28	1989.41	3873.48	3293.09	6655.13	6887.42	3377.63	7274.93	4058.62	3134.39	3581.57	4164.37	2896.99	3832.11	2993.15	1901.25	2939.18	1831.1	NoTM	outside	Cytoplasm;Melanosome;Nucleus, nucleolus;Cell membrane;Translocates rapidly from the cytoplasm to the nuclei, and especially to the nucleoli, upon heat shock	HSPA8	2.12997	1.09083	0.0865061	1.06295	208	0.200045	0.698871
[R].DHKGLYTGR.[C]	1xBiotin [K3]	4	4	Q16787-1	Q16787-1 [66-74]	Q16787-1 1xBiotin [K68]	Isoform 1 of Laminin subunit alpha-3 [OS=Homo sapiens]	1	1272.62	3732.2	4172.03	4893.38	5029.27	8823.96	6676.51	8552.28	8689.4	9843.31	2598.94	4556.67	7334.09	5433.25	6502.72	6004.23	3128.24	4603.81	5202.45	NoTM	outside	Secreted, extracellular space, extracellular matrix, basement membrane	LAMA3	1.60418	0.68184	0.0884204	1.05345	209	0.203494	0.691449
[R].DKLRPIPITASVEIQEPSSR.[R]	1xBiotin [K2]	8	8	P23229-1	P23229-1 [614-633]	P23229-1 1xBiotin [K615]	integrin alpha-6 [OS=Homo sapiens]	1	2462.31	15203.7	18779.9	9529.08	6529.67	7858.26	9883.26	18988.1	10614.3	10841.5	24259.3	10807.4	19521.9	11877.6	9759.37	9586.3	16504.1	18604.7	14063.6	HasTM	outside	Cell membrane;Cell membrane	ITGA6	0.557795	-0.842192	0.0887009	1.05207	210	0.203167	0.692146
[R].SKGQESFK.[K]	1xBiotin [K2]	2	2	P06748	P06748 [222-229]	P06748 1xBiotin [K223]	Nucleophosmin [OS=Homo sapiens]	1	1136.54	2444.29	3825.57	1909.3	4068.42	7943.69	4907.03	3909.77	3771.5	5325.94	2108.43	2077.3	3826.63	2950.36	3386.32	3953.34	3697.85	2216.8	3027.07	NoTM	outside	Nucleus, nucleolus;Nucleus, nucleoplasm;Cytoplasm, cytoskeleton, microtubule organizing center, centrosome;Has been found in the cytoplasm in patients with primary acute myelogenous leukemia (AML), but not with secondary AML;Can shuttle between cytoplasm and nucleus;Co- localizes with the methylated form of RPS10 in the granular component (GC) region of the nucleolus;Colocalized with nucleolin an…	NPM1	2.06857	1.04863	0.0899253	1.04612	211	0.204996	0.688256
[R].TWQKTHQGENNGLANSIR.[D]	1xBiotin [K4]	4	2	Q16787-1	Q16787-1 [399-416]	Q16787-1 1xBiotin [K402]	Isoform 1 of Laminin subunit alpha-3 [OS=Homo sapiens]	1	2280.09	2649.88	2520.01	2853.74	3530.46	4738.27	3095.21	2176.1	7911.98	5807.49	3862.55	2603.11	3730.9	1755.6	2720.71	3994.23	3190.94	3059.87	1905.85	NoTM	outside	Secreted, extracellular space, extracellular matrix, basement membrane	LAMA3	1.41631	0.502135	0.09036	1.04402	212	0.205015	0.688215
[R].HLKIVYR.[R]	1xBiotin [K3]	1	15	P61927	P61927 [66-72]	P61927 1xBiotin [K68]	60S ribosomal protein L37 [OS=Homo sapiens]	1	1154.65	34466.2	37757	28616.6	16841.5	28534.3	25983.1	24919.5	26818	23372.6	25625.4	35675.1	42876.3	24192.8	37431.9	23909.5	26444	39763.3	32529.2	NoTM	outside	NO_DATA	RPL37	0.707645	-0.498901	0.091465	1.03874	213	0.206548	0.684979
[K].KLEDGPKFLK.[S]	1xBiotin [K7]	3	5	P68104	P68104 [386-395]	P68104 1xBiotin [K392]	Elongation factor 1-alpha 1 [OS=Homo sapiens]	2	1400.76	2000.05	13594.2	13579	14901.1	21683.7	23446.4	16106.3	22169.3	21666.2	8576.3	16617.8	18628.8	16469.2	20309.3	16501.7	7584.55	7215.46	6121.77	NoTM	outside	Cytoplasm;Nucleus;Nucleus, nucleolus;Cell membrane;Translocates together with ZPR1 from the cytoplasm to the nucleus and nucleolus after treatment with mitogens (PubMed:8650580);Localization at the cell membrane depends on EEF1A1 phosphorylation status and the presence of PPP1R16B (PubMed:26497934)	EEF1A1	2.05774	1.04106	0.0918313	1.03701	214	0.206406	0.685278
[K].KHLEINPDHSIIETLR.[Q]	1xBiotin [K1]	2	1	P07900	P07900 [632-647]	P07900 1xBiotin [K632]	Heat shock protein HSP 90-alpha [OS=Homo sapiens]	1	2141.12	1801.44	2222.76	2767.27	2587.15	3707.19	4332.38	3138.83	3360.53	3660.41	2395.81	2913.58	3274.36	3153.97	3684.72	2773.63	2258.43	3238.88	2505.94	NoTM	outside	Nucleus;Cytoplasm;Melanosome;Cell membrane	HSP90AA1	1.56471	0.645899	0.093024	1.03141	215	0.208114	0.681698
[R].APFDLFENKK.[K]	1xBiotin [K9]	2	1	P08238	P08238 [339-348]	P08238 1xBiotin [K347]	Heat shock protein HSP 90-beta [OS=Homo sapiens]	1	1434.71	3296.53	3202.52	2504.23	3349.53	6110.3	5044.15	1956.74	5206.26	4349.11	2046.25	3786.21	2427.81	4122.03	2576.64	3502.35	1713.19	3138.14	2575.84	NoTM	outside	Cytoplasm;Melanosome;Nucleus;Secreted;Cell membrane;Translocates with BIRC2 from the nucleus to the cytoplasm during differentiation (PubMed:18239673);Secreted when associated with TGFB1 processed form (LAP) (PubMed:20599762)	HSP90AB1	1.61096	0.687925	0.0949336	1.02258	216	0.211403	0.674889
[K].GTGASGSFKLNK.[K]	1xBiotin [K]	5	6	P16401; P10412	P16401 [101-112]; P10412 [98-109]	P16401 1xBiotin [K]; P10412 1xBiotin [K]	Histone H1.5 [OS=Homo sapiens] Histone H1.4 [OS=Homo sapiens]	1	1392.69	2820.49	6922.35	5959.92	6508.79	15031.1	18223.2	7097.9	16906.1	18243.2	4860.47	9913.22	11580.3	2730.16	9273.73	5196.57	3209.63	4147.72	5077.56	NoTM	outside	Nucleus;Chromosome;According to PubMed:10997781 associates with actively transcribed chromatin and not heterochromatin	HIST1H1B	2.53224	1.34041	0.0966516	1.01479	217	0.214237	0.669106
[R].KTVTAMDVVYALK.[R]	1xBiotin [K1]	1	5	P62805	P62805 [80-92]	P62805 1xBiotin [K80]	histone H4 [OS=Homo sapiens]	1	1664.88	3052.89	3636.58	3488.32	4547.37	18139.3	23074.9	2427.54	18227.5	13131	2121.37	12277.4	2629.73	4004.14	3644.04	1735.45	3614.78	4531.55	1734.81	NoTM	outside	Nucleus;Chromosome	HIST4H4	4.49622	2.16871	0.0990763	1.00403	218	0.218604	0.660342
[R].LIGDAAKNQVALNPQNTVFDAK.[R]	1xBiotin [K7]	2	6	P0DMV8	P0DMV8 [50-71]	P0DMV8 1xBiotin [K56]	heat shock 70 kDa protein 1A [OS=Homo sapiens]	1	2553.31	2537	14031	13615.1	14551.1	21866.1	23073.9	21622.6	22451.5	28763.3	17331.1	26249.8	17464	13228	17788.9	16314.5	10087.6	14044.1	17460.4	NoTM	outside	Cytoplasm;Nucleus;Cytoplasm, cytoskeleton, microtubule organizing center, centrosome	HSPA1A	1.97101	0.978932	0.101463	0.993691	219	0.222849	0.65199
[K].LIINSLYKNK.[E]	1xBiotin [K]	1	4	P14625	P14625 [88-97]	P14625 1xBiotin [K]	Endoplasmin [OS=Homo sapiens]	1	1431.8	3407.83	3600.98	2891.4	3475.74	5091.82	5613.24	3690.15	7134.66	5846.32	2171.31	4319.17	2062.97	2670.23	5237.76	4970.8	2757.11	2314.31	3656.78	NoTM	outside	Endoplasmic reticulum lumen;Sarcoplasmic reticulum lumen;Melanosome	HSP90B1	1.43237	0.518407	0.102915	0.987523	220	0.225009	0.647801
[R].VTIMPKDIQLAR.[R]	1xBiotin [K6]	5	2	P84243	P84243 [118-129]	P84243 1xBiotin [K123]	histone H3.3 [OS=Homo sapiens]	1	1610.88	3181.64	1781.85	3277.58	3211.16	5013.6	4600.17	3321.41	7266.2	3671.38	3852.2	4049.24	3948.97	3649.98	2942.21	3820.62	2200.59	3556.42	3265.78	NoTM	inside	Nucleus;Chromosome	H3F3B	1.55622	0.638048	0.103985	0.983028	221	0.226321	0.645275
[K].FIDTTSKFGHGR.[F]	1xBiotin [K7]	2	1	P39023	P39023 [367-378]	P39023 1xBiotin [K373]	60S ribosomal protein L3 [OS=Homo sapiens]	1	1591.77	21588.3	19752.3	27068	14605.6	10692.9	20500.3	15807.1	15304.7	14064.2	26219.4	16320.8	30528.2	10272.4	28267.5	32845.1	14707.7	20163.9	27636.2	NoTM	outside	Nucleus, nucleolus;Cytoplasm	RPL3	0.669489	-0.578868	0.104353	0.981493	222	0.226099	0.645701
[K].GQEVSPKVYFMK.[Q]	1xBiotin [K7]	1	7	P09936	P09936 [72-83]	P09936 1xBiotin [K78]	Ubiquitin carboxyl-terminal hydrolase isozyme L1 [OS=Homo sapiens]	1	1638.8	3998.05	4959.07	6902.89	5880.75	10354.8	10561.1	9241.96	13040.2	10235.7	9773.7	9325.52	2956.36	7661.47	9498.81	5832.45	3591.06	10922.2	9068.03	NoTM	outside	Cytoplasm;Endoplasmic reticulum membrane	UCHL1	1.68958	0.756662	0.105599	0.976339	223	0.227773	0.642498
[K].VIPELNGKLTGMAFR.[V]	1xBiotin [K8]	2	7	P04406-1	P04406-1 [220-234]	P04406-1 1xBiotin [K227]	glyceraldehyde-3-phosphate dehydrogenase [OS=Homo sapiens]	1	1871.99	3442.2	2347.55	1904.26	2870.75	9232.91	10260.5	3309.5	9915.15	3655.7	3632.69	5919.88	1762.48	4140.57	9342.77	9303.48	2210.11	16944.5	16031	NoTM	outside	Cytoplasm, cytosol;Nucleus;Cytoplasm, perinuclear region;Membrane;Cytoplasm, cytoskeleton;Postnuclear and Perinuclear regions	GAPDH	2.9067	1.53938	0.106541	0.972484	224	0.228778	0.640587
[R].QQIMQLKIMTNR.[L]	1xBiotin [K7]; 2xOxidation [M4; M9]	1	14	P35052	P35052 [455-466]	P35052 1xBiotin [K461]	Glypican-1 [OS=Homo sapiens]	1	1761.88	2275.33	3876.38	2774.49	73787.2	24238.2	19268.9	90200.4	18155.5	35768.5	104275	49711.7	90469.1	3448.19	3629.79	2607.18	1775.34	3041.99	2019.06	NoTM	outside	Cell membrane;Lipid-anchor, GPI-anchor;Extracellular side;Endosome;Localizes to CAV1-containing vesicles close to the cell surface;Cleavage of heparan sulfate side chains takes place mainly in late endosomes;Associates with both forms of PRNP in lipid rafts;Colocalizes with APP in perinuclear compartments and with CP in intracellular compartments;Associates with fibrillar APP amyloid-beta peptide…	GPC1	13.1404	3.71594	0.106649	0.972043	225	0.227992	0.64208
[K].AENKGISPVVSEHR.[K]	1xBiotin [K4]	4	9	Q99700-1	Q99700-1 [778-791]	Q99700-1 1xBiotin [K781]	Ataxin-2 [OS=Homo sapiens]	1	1748.87	1771.21	5424.49	10431.9	7709.62	18313.3	21190.8	9376.57	16687.4	17947.9	10646.5	15913.2	16117.5	9216.8	10387.5	6961.83	2562.09	11625.6	13255.6	NoTM	outside	Cytoplasm	ATXN2	2.67839	1.42136	0.109479	0.960669	226	0.233006	0.632632
[R].KPIDYTILDDIGHGVK.[WV]	1xBiotin [K1]	4	1	Q9NYB9	Q9NYB9 [139-154]	Q9NYB9 1xBiotin [K139]	abl interactor 2 [OS=Homo sapiens]	0	2010.04	3018.53	6666.81	11663.2	1971.48	2086.73	1875.93	2592.95	2317.45	3509.36	4059.59	4028.54	2303.27	3913.23	2915.81	9173.63	1820.89	12715.4	11034.5	NoTM	outside	Cytoplasm;Nucleus;[Isoform 1]: Cell projection, lamellipodium;Cell projection, filopodium;Cytoplasm, cytoskeleton;Cell junction, adherens junction;Present at nascent adherens junctions, where it clusters adjacent to the tips of F-actin protrusions (PubMed:15572692);[Isoform 1]: Cell projection, lamellipodium;Cell projection, filopodium;Cytoplasm, cytoskeleton;Cell junction, adherens junction;Pres…	ABI2	0.277964	-1.84703	0.109684	0.959858	227	0.232414	0.633739
[K].VEKVTISNR.[L]	1xBiotin [K3]	2	1	P08238	P08238 [575-583]	P08238 1xBiotin [K577]	Heat shock protein HSP 90-beta [OS=Homo sapiens]	1	1271.68	12970.2	12435.8	14409.2	12725.7	9631.05	10890.1	7511.83	9506.73	7004.98	10716.8	4575.14	8378.63	7190.05	4495.25	8848	12008.5	12329.9	9290.69	NoTM	outside	Cytoplasm;Melanosome;Nucleus;Secreted;Cell membrane;Translocates with BIRC2 from the nucleus to the cytoplasm during differentiation (PubMed:18239673);Secreted when associated with TGFB1 processed form (LAP) (PubMed:20599762)	HSP90AB1	0.835027	-0.260105	0.11124	0.95374	228	0.234677	0.629529
[R].LAKYNQLLR.[I]	1xBiotin [K3]	2	3	P06733-1	P06733-1 [404-412]	P06733-1 1xBiotin [K406]	alpha-enolase [OS=Homo sapiens]	1	1344.75	2534.01	3810.71	1859.59	2936.31	14023.3	12995.8	3407.02	2309.49	12948.7	3118.82	9944.62	6892.62	3340.99	1763.12	2927.1	1959.05	2468.64	3494.28	NoTM	outside	Cytoplasm;Cell membrane;Cytoplasm, myofibril, sarcomere, M line;ENO1 is localized to the M line;[Isoform MBP-1]: Nucleus;[Isoform MBP-1]: Nucleus	ENO1	3.65117	1.86836	0.113029	0.94681	229	0.23741	0.624501
[K].ESQKPFEVKGPLPVHTK.[S]	1xBiotin [K9]	1	6	P56181-2	P56181-2 [280-296]	P56181-2 1xBiotin [K288]	Isoform 2 of NADH dehydrogenase [ubiquinone] flavoprotein 3, mitochondrial [OS=Homo sapiens]	1	2147.13	3344.25	20833.1	16852.7	3720.27	2308.07	2838.25	2758.37	1900.85	3703.38	3573.66	3972.46	3358.53	7872.76	17413.2	18267.3	4066.49	19418.3	21698	NoTM	outside	Mitochondrion inner membrane	NDUFV3	0.2161	-2.21023	0.113545	0.944832	230	0.237457	0.624415
[K].NAKFYPVTR.[E]	1xBiotin [K3]	1	4	P54851	P54851 [127-135]	P54851 1xBiotin [K129]	Epithelial membrane protein 2 [OS=Homo sapiens]	1	1321.67	46528.3	20205.5	24829.7	18808.6	10668.5	10408.4	19082.5	2712.56	8995.72	3393.52	1924.84	1995.85	20576.6	17908.1	22698.6	18985.3	18456	16492.5	HasTM	outside	Golgi apparatus membrane;Cell membrane;Apical cell membrane;Membrane raft;Cytoplasm;Nucleus;Localizes to the apical cell surface in the luminal epithelium and glandular epithelium;Colocalized with ITGB1 and GPI- anchor proteins on plasma membrane	EMP2	0.435605	-1.19891	0.114792	0.940087	231	0.239026	0.621554
[R].VNFAMNVGKAR.[G]	1xBiotin [K9]; 1xOxidation [M5]	3	2	P14618	P14618 [490-500]	P14618 1xBiotin [K498]	Pyruvate kinase PKM [OS=Homo sapiens]	1	1448.71	2891.05	4095.56	1771.98	7019.4	3756.55	4994.41	12357.1	3443.42	4540.97	10148.6	3190.67	6150.97	2788.5	5430.81	1894.16	2346.18	1723.8	2650.93	NoTM	outside	Cytoplasm;Nucleus;Nuclear translocation is sufficient to induce cell death that is caspase independent, isoform-specific and independent of its enzymatic activity	PKM	1.80056	0.848445	0.11503	0.939189	232	0.238489	0.622532
[K].SLLGKDVLFLK.[D]	1xBiotin [K5]	3	3	P00558	P00558 [87-97]	P00558 1xBiotin [K91]	phosphoglycerate kinase 1 [OS=Homo sapiens]	1	1458.84	1947.67	2344.35	4092.34	3464.14	5083.55	4829.19	2992.92	3155.44	2952.76	2122.68	4016.39	2103.9	2725.65	4119.43	3459.15	3029.87	4029.34	3236.27	NoTM	outside	Cytoplasm	PGK1	1.59546	0.673968	0.115056	0.93909	233	0.237519	0.624301
[R].SNDPKSQNHPGWLMR.[G]	1xBiotin [K5]	2	4	P06213-1	P06213-1 [567-581]	P06213-1 1xBiotin [K571]	insulin receptor [OS=Homo sapiens]	1	1992.92	4006.51	2222.58	3389.7	3305.89	12459.8	12534.9	4597.11	14451.1	12220.2	3326.48	15070.2	2468.61	1764.86	1835.51	1847.35	2086.36	2701.39	2737.21	HasTM	outside	Cell membrane;Late endosome;Lysosome;In the presence of SORL1, internalized INSR molecules are redirected back to the cell surface, thereby preventing their lysosomal catabolism and strengthening insulin signal reception	INSR	2.94222	1.5569	0.115657	0.93683	234	0.237738	0.623901
[K].LQALKDTANR.[L]	1xBiotin [K5]	2	17	P29401	P29401 [12-21]	P29401 1xBiotin [K16]	Transketolase [OS=Homo sapiens]	1	1355.71	26243.8	24838.1	23521.6	16073.5	16964.5	24622.7	20179.5	15975	22856.7	22559.2	19457.8	17565.2	56233.3	34021	24959.8	33836.6	17339.3	21806.2	NoTM	outside	NO_DATA	TKT	0.772896	-0.371653	0.116228	0.934689	235	0.237896	0.623612
[K].TAASAPANVSKGTTPLAPPPKPVR.[R]	1xBiotin [K11]	4	8	Q96D71	Q96D71 [681-704]	Q96D71 1xBiotin [K691]	RalBP1-associated Eps domain-containing protein 1 [OS=Homo sapiens]	1	2554.38	3345.41	11726.7	12332.4	3640.74	2660.81	3640.99	3334.13	2965.33	3319.48	2409.47	3311.04	3949.44	15002.3	16825.1	12541.6	3090.1	16353.9	16957.2	NoTM	outside	Membrane, clathrin-coated pit	REPS1	0.362807	-1.46273	0.116846	0.932386	236	0.238148	0.623153
[K].TKEAVLLLK.[K]	1xBiotin [K2]	1	1	P36578	P36578 [164-172]	P36578 1xBiotin [K165]	60S ribosomal protein L4 [OS=Homo sapiens]	1	1240.73	1805.94	1968.2	3434.98	3058.35	4667.15	3652.48	3266.54	5516.94	6108.18	3530.92	3987.16	2167.89	3493.76	4633.51	3957.75	2824.37	3024.71	1976.52	NoTM	outside	NO_DATA	RPL4	1.57828	0.658349	0.117833	0.928735	237	0.239145	0.621338
[R].SSKGQIIGNFQAFDEDTGLPAHAR.[Y]	1xBiotin [K3]	1	2	Q14126	Q14126 [404-427]	Q14126 1xBiotin [K406]	Desmoglein-2 [OS=Homo sapiens]	1	2785.34	2085.97	2368.63	3768.44	8436.95	4574.84	4017.27	2651.83	2412.87	2966.06	3008.92	3488.68	3604.86	2455.37	3060.43	6247.05	2238.56	2953.86	2680.18	HasTM	outside	Cell membrane;Single-pass type I membrane protein;Cell junction, desmosome	DSG2	2.07089	1.05025	0.119041	0.924305	238	0.240582	0.618737
[K].AIHNKVNIVPVIAK.[A]	1xBiotin [K5]	3	10	Q15019	Q15019 [170-183]	Q15019 1xBiotin [K174]	septin-2 [OS=Homo sapiens]	1	1742.01	21347.4	26368	24361.2	16286.4	18292.9	22946.9	18683	18651.9	15689.8	19152.6	20270.4	18923.8	21906.3	32344	23327.5	33175.2	31616.4	24703.3	NoTM	outside	Cytoplasm;Cytoplasm, cytoskeleton;Cytoplasm, cytoskeleton, spindle;Chromosome, centromere, kinetochore;Cleavage furrow;Midbody;Cytoplasm, cell cortex;Cell projection, cilium membrane;Cell projection, cilium, flagellum;At the metaphase plate, in close apposition to the kinetochores of the congressed chromosomes;In cells undergoing cytokinesis, localized to the midbody, the ingressing cleavage furr…	SEPTIN2	0.798125	-0.325313	0.119246	0.923556	239	0.239989	0.619809
[R].VDKSAVGFDYQGK.[T]	1xBiotin [K3]	3	7	Q14247-1	Q14247-1 [169-181]	Q14247-1 1xBiotin [K171]	Src substrate cortactin [OS=Homo sapiens]	1	1639.78	2896.17	10207.3	8852.27	2957.48	2792.49	2986.35	2261.94	3131.93	3924.09	1793.93	1991.61	3130.94	14010.9	9862.98	13858.2	13423	10263.4	9299.43	NoTM	outside	Cytoplasm, cytoskeleton;Cell projection, lamellipodium;Cell projection, ruffle;Cell projection, dendrite;Cell projection;Cell membrane;Cell projection, podosome;Cell junction;Cell junction, focal adhesion;Membrane, clathrin-coated pit;Cell projection, dendritic spine;Cytoplasm, cell cortex;Associated with membrane ruffles and lamellipodia;In the presence of CTTNBP2NL, colocalizes with stress fibe…	CTTN	0.397906	-1.3295	0.12133	0.916033	240	0.243165	0.614099
[K].GQPLCVLSAMKMETVVTSPMEGTVR.[K]	1xBiotin [K11]; 1xCarbamidomethyl [C5]; 2xOxidation [M12; M]	1	503	P11498	P11498 [1134-1158]	P11498 1xBiotin [K1144]	pyruvate carboxylase, mitochondrial [OS=Homo sapiens]	1	2979.41	1.92014e+06	3.84444e+06	4.78366e+06	2.25663e+06	1.81304e+06	1.24454e+06	912229	1.98176e+06	1.68074e+06	1.11391e+06	2.34293e+06	1.61418e+06	1.4046e+06	2.21257e+06	4.15235e+06	3.39097e+06	2.57776e+06	2.23708e+06	NoTM	outside	Mitochondrion matrix	PC	0.503801	-0.989075	0.122193	0.912952	241	0.24388	0.612824
[R].QQIMQLKIMTNR.[L]	1xBiotin [K7]	1	16	P35052	P35052 [455-466]	P35052 1xBiotin [K461]	Glypican-1 [OS=Homo sapiens]	1	1729.89	3080.15	3653.39	3804.43	6912.56	42840.3	73236	9304.21	54053.3	44695.6	21381.8	47594	18090.2	2229.79	3262.53	3266.21	1809.82	3347.4	3663.8	NoTM	outside	Cell membrane;Lipid-anchor, GPI-anchor;Extracellular side;Endosome;Localizes to CAV1-containing vesicles close to the cell surface;Cleavage of heparan sulfate side chains takes place mainly in late endosomes;Associates with both forms of PRNP in lipid rafts;Colocalizes with APP in perinuclear compartments and with CP in intracellular compartments;Associates with fibrillar APP amyloid-beta peptide…	GPC1	11.671	3.54486	0.122199	0.912933	242	0.242883	0.614603
[R].KFGDPVVQSDMK.[H]	1xBiotin [K1]	2	4	P0DMV8	P0DMV8 [77-88]	P0DMV8 1xBiotin [K77]	heat shock 70 kDa protein 1A [OS=Homo sapiens]	1	1576.75	2237.17	2403.39	3974.91	3091.85	7724.68	10109.3	2345.64	11694.6	8827.82	2405.06	5136.74	3030.46	2722.9	8162.75	4276.05	3985.11	7454.12	4412.03	NoTM	outside	Cytoplasm;Nucleus;Cytoplasm, cytoskeleton, microtubule organizing center, centrosome	HSPA1A	2.42887	1.28029	0.126746	0.897066	243	0.250884	0.600527
[K].KTSGVVR.[L]	1xBiotin [K1]	4	1	Q16787-1	Q16787-1 [1134-1140]	Q16787-1 1xBiotin [K1134]	Isoform 1 of Laminin subunit alpha-3 [OS=Homo sapiens]	1	972.53	1797.36	6044.89	8244.57	9539.42	7560	12152.1	16697.1	10412	13165	5303.98	3680.02	3656.3	14834.5	17014.6	10072.7	3888.02	6982.89	3769.28	NoTM	outside	Secreted, extracellular space, extracellular matrix, basement membrane	LAMA3	1.81835	0.862633	0.130628	0.883963	244	0.257509	0.589208
[K].EFDGKSLVSVTK.[E]	1xBiotin [K5]	3	4	P08238	P08238 [527-538]	P08238 1xBiotin [K531]	Heat shock protein HSP 90-beta [OS=Homo sapiens]	1	1535.78	3889.07	6081.52	4411.27	5707.6	6119.13	7843.47	2185.45	6575.63	4904.31	7756.54	7884.79	3887.15	2234.67	4661.74	4178.97	2734.4	5883.29	5280.5	NoTM	outside	Cytoplasm;Melanosome;Nucleus;Secreted;Cell membrane;Translocates with BIRC2 from the nucleus to the cytoplasm during differentiation (PubMed:18239673);Secreted when associated with TGFB1 processed form (LAP) (PubMed:20599762)	HSP90AB1	1.36771	0.451761	0.130976	0.88281	245	0.25714	0.589831
[R].LDYLSSLKVK.[G]	1xBiotin [K]	4	12	P08195	P08195 [248-257]	P08195 1xBiotin [K]	4F2 cell-surface antigen heavy chain [OS=Homo sapiens]	1	1391.76	14706	13311.5	17064	12571.2	12119.6	13652.6	20145.7	18982.5	13471.3	28149.5	27750.5	22359	11277.7	17901	14007.4	1940.77	6231.58	5879.74	HasTM	outside	Apical cell membrane;Cell membrane;Cell junction;Lysosome membrane;Melanosome;Localized at the plasma membrane when associated with SLC7A5 or SLC7A8 (PubMed:9751058, PubMed:11311135);Localized to the apical membrane of placental syncytiotrophoblastic cells (PubMed:11742812);Recruited to lysosomes by LAPTM4B (PubMed:25998567);Located selectively at cell- cell adhesion sites (By similarity);Colocal…	SLC3A2	0.850532	-0.233562	0.131112	0.882357	246	0.256362	0.591147
[K].TAIGKAGYTDK.[V]	1xBiotin [K5]	2	6	P06733-1	P06733-1 [229-239]	P06733-1 1xBiotin [K233]	alpha-enolase [OS=Homo sapiens]	1	1350.67	3627.44	4049.49	5009.39	3688.13	19783.7	19221.4	19088.7	16047.6	17359.4	3901.37	10672.8	13677.9	3081.19	5456.32	2037.45	3816.8	2231.71	2680.16	NoTM	outside	Cytoplasm;Cell membrane;Cytoplasm, myofibril, sarcomere, M line;ENO1 is localized to the M line;[Isoform MBP-1]: Nucleus;[Isoform MBP-1]: Nucleus	ENO1	3.3653	1.75073	0.131619	0.880683	247	0.25631	0.591234
[R].HQGVMVGMGQKDSYVGDEAQSK.[R]	1xBiotin [K11]; 1xOxidation [M]	6	5	P60709	P60709 [40-61]	P60709 1xBiotin [K50]	Actin, cytoplasmic 1 [OS=Homo sapiens]	1	2593.15	1904.08	2237.37	4173.39	2656.73	9763.63	10316.4	3480.63	12828.7	10499.7	4145.58	3039.85	2252.47	3277.66	2920.17	3926.26	3142.21	2280.24	1949.64	NoTM	outside	Cytoplasm, cytoskeleton;Nucleus	ACTB	2.73448	1.45127	0.134261	0.872049	248	0.260402	0.584356
[K].TKIISNR.[G]	1xBiotin [K2]	3	29	P00533-1	P00533-1 [488-494]	P00533-1 1xBiotin [K489]	epidermal growth factor receptor [OS=Homo sapiens]	1	1057.58	685026	697220	764439	435412	566035	698950	616043	633260	715158	276694	261016	296948	239354	228263	167233	93311	82347.3	78535.5	HasTM	outside	Cell membrane;Endoplasmic reticulum membrane ;Single-pass type I membrane protein;Golgi apparatus membrane;Single-pass type I membrane protein;Nucleus membrane;Single-pass type I membrane protein;Endosome;Endosome membrane;Nucleus;Endocytosed upon activation by ligand (PubMed:2790960, PubMed:17182860, PubMed:27153536);Colocalized with GPER1 in the nucleus of estrogen agonist-induced cancer-associ…	EGFR	0.792103	-0.336239	0.136416	0.865133	249	0.263519	0.579187
[R].KYAYSAASGGR.[R]	1xBiotin [K1]	1	7	P17301	P17301 [261-271]	P17301 1xBiotin [K261]	Integrin alpha-2 [OS=Homo sapiens]	1	1356.64	56354.8	37276.6	32091.2	31353.6	20556.9	29176.2	41623.5	21950.2	29671.8	16063.6	11578.5	9747.34	46350	35366.4	26023.6	18905.6	14266.1	13927.9	HasTM	outside	Membrane;Single-pass type I membrane protein	ITGA2	0.644965	-0.632707	0.139373	0.85582	250	0.268154	0.571615
[K].ELGYTVKK.[H]	1xBiotin [K]	1	5	P30533	P30533 [333-340]	P30533 1xBiotin [K]	alpha-2-macroglobulin receptor-associated protein [OS=Homo sapiens]	1	1163.61	3542.93	12252.8	7295.3	4075.92	2142.06	2622.02	2877.07	2838.86	3438.25	3323.06	1731.84	2974.26	5896.66	7196.27	10199.2	4042.21	8999.95	10869	HasTM	outside	Rough endoplasmic reticulum lumen;Endoplasmic reticulum-Golgi intermediate compartment lumen;Golgi apparatus, cis- Golgi network;Golgi apparatus lumen;Endosome lumen;Cell surface	LRPAP1	0.382832	-1.38522	0.140379	0.852698	251	0.269013	0.570226
[-].MPFSNSHNALKLR.[F]	1xBiotin [K11]; 1xMet-loss [N-Term]	1	16	P12277	P12277 [1-13]	P12277 1xBiotin [K11]; 1xMet-loss [N-Term]	Creatine kinase B-type [OS=Homo sapiens]	1	1609.83	50696.3	118159	140270	14812	51456.6	69988.6	20764.8	64570.2	43392.5	25135.7	42472	21424.7	180766	245630	175026	125873	301904	283435	NoTM	outside	Cytoplasm	CKB	0.440783	-1.18186	0.140786	0.85144	252	0.268723	0.570695
[R].LVKGPDPSSPAFR.[I]	1xBiotin [K3]	1	10	P07996	P07996 [48-60]	P07996 1xBiotin [K50]	thrombospondin-1 [OS=Homo sapiens]	1	1596.82	15431.4	14192.2	9482.35	16412.4	15335.1	20311.1	17683.1	12989.4	13054.1	21973.9	22240.7	25514.7	22488.7	19479.7	13086.4	17839.2	15926	14622.5	NoTM	outside	Secreted;Cell surface;Secreted, extracellular space, extracellular matrix;Endoplasmic reticulum;Sarcoplasmic reticulum;Incorporated into the extracellular matrix of fibroblasts (PubMed:6341993);Also detected in the endoplasmic reticulum and sarcoplasmic reticulum where it plays a role in the ER stress response (By similarity)	THBS1	1.33122	0.412748	0.141283	0.84991	253	0.268605	0.570886
[K].HQPGGGKVQIVYKPVDLSK.[V]	1xBiotin [K7]	4	6	P10636-5	P10636-5 [268-286]	P10636-5 1xBiotin [K274]	Isoform Tau-C of Microtubule-associated protein tau [OS=Homo sapiens]	1	2276.22	2071.87	4848.31	5348.66	5776.46	12292.1	24179.7	13443.8	20604.1	9647.14	5254.03	9178.17	21851.8	5465.4	1918.28	4512.37	2539.75	1949.22	4158.7	NoTM	outside	Cytoplasm, cytosol;Cell membrane;Cytoplasm, cytoskeleton;Cell projection, axon;Cell projection, dendrite	MAPT	3.44355	1.7839	0.142452	0.84633	254	0.269762	0.569019
[R].KAQTLNNNVNR.[A]	1xBiotin [K1]	4	1	Q16787-1	Q16787-1 [306-316]	Q16787-1 1xBiotin [K306]	Isoform 1 of Laminin subunit alpha-3 [OS=Homo sapiens]	1	1497.76	3939.5	3802.21	2044.04	5939.6	3434.87	6274.9	6850.97	5259.43	6393.06	3122.85	2095.73	1802.18	2893.62	1957.73	2578.43	4087.11	2544.79	3490.5	NoTM	outside	Secreted, extracellular space, extracellular matrix, basement membrane	LAMA3	1.5992	0.677352	0.145741	0.836419	255	0.274907	0.560814
[K].EDAMKTK.[T]	1xBiotin [K5]	3	9	Q29983	Q29983 [171-177]	Q29983 1xBiotin [K175]	MHC class I polypeptide-related sequence A [OS=Homo sapiens]	1	1048.48	3099.21	3934.79	3848.01	1900.19	60681	94350.4	2018.61	97342.1	87227.2	16800.2	48128.3	17743.6	4148.28	2442.63	2015.95	2374.79	1904.94	2083.21	HasTM	outside	Cell membrane;Cytoplasm;Infection with human adenovirus 5 suppresses cell surface expression due to the adenoviral E3-19K protein which causes retention in the endoplasmic reticulum	MICA	14.4212	3.85012	0.145891	0.835971	256	0.274116	0.562066
[K].DGADFAKWR.[C]	1xBiotin [K7]	3	2	P04075	P04075 [141-149]	P04075 1xBiotin [K147]	fructose-bisphosphate aldolase A [OS=Homo sapiens]	1	1291.59	1931.3	3675.84	4012.77	3799.37	4947.66	4908.81	2171.31	5756.22	5598.43	3464.31	4330.73	4090.98	3696.99	3716.02	2804.52	3944.41	2193.55	2378.57	NoTM	outside	Cytoplasm, myofibril, sarcomere, I band;Cytoplasm, myofibril, sarcomere, M line	ALDOA	1.41954	0.505422	0.14602	0.835588	257	0.27329	0.563376
[R].KISSPTGSK.[D]	1xBiotin [K1]	2	4	Q99623	Q99623 [89-97]	Q99623 1xBiotin [K89]	Prohibitin-2 [OS=Homo sapiens]	1	1130.59	11577.6	13649.1	13328.7	10476.9	8462.01	12469.7	22025.1	13176.4	14888.8	6434.93	4225.78	4700.14	19392.2	14931.3	11739.3	8397.11	7514.24	6082.13	NoTM	outside	Mitochondrion inner membrane;Cytoplasm;Nucleus	PHB2	0.814635	-0.295773	0.146353	0.834598	258	0.272852	0.564073
[K].TFLHYDCGSKTVTPVSPLGK.[K]	1xBiotin [K10]; 1xCarbamidomethyl [C7]	2	4	Q6H3X3	Q6H3X3 [60-79]	Q6H3X3 1xBiotin [K69]	UL-16 binding protein 5 [OS=Homo sapiens]	1	2433.19	3435.47	1972.89	3362.65	2838.35	6389.99	6975.05	1945.39	6284.16	8423.27	1928.96	3702.25	2765.85	3087.69	2862.09	2433.69	2301.28	2830.23	2344.35	NoTM	outside	[Isoform 1]: Cell membrane;Endoplasmic reticulum;[Isoform 2]: Secreted;[Isoform 2]: Secreted	RAET1G	1.84738	0.88548	0.146444	0.834328	259	0.271967	0.565483
[R].LDPFADGGKTPDPK.[M]	1xBiotin [K9]	1	5	O75533-1	O75533-1 [133-146]	O75533-1 1xBiotin [K141]	splicing factor 3B subunit 1 [OS=Homo sapiens]	1	1683.8	3578.74	28171.8	28438.8	1809.88	7421.4	5693.67	3565.35	5703.74	4631.13	4725.42	7344.75	3733.55	26241.8	37476.1	32735.9	19868.6	41598	40994	NoTM	outside	Nucleus;Nucleus speckle	SF3B1	0.247967	-2.01178	0.147174	0.832168	260	0.272273	0.564996
[K].KYFLQTTTPLDYEK.[V]	1xBiotin [K1]	2	3	Q08174	Q08174 [455-468]	Q08174 1xBiotin [K455]	Protocadherin-1 [OS=Homo sapiens]	1	1972.97	2098.73	2100.25	3735.86	3126.95	4363.16	3958	3479.06	5139.05	4079.34	2958.08	2788.03	2698.81	3719.06	1818.25	5234.09	2376.42	1712.54	3645.95	HasTM	outside	Cell junction;Cell membrane	PCDH1	1.44277	0.528839	0.148627	0.827902	261	0.273907	0.562397
[K].IKGEHPGLSIGDVAK.[K]	1xBiotin [K2]	2	3	P09429	P09429 [113-127]	P09429 1xBiotin [K114]	High mobility group protein B1 [OS=Homo sapiens]	1	1746.92	1792.29	2397.87	2518.35	1827.02	8270.14	7721.84	2009.37	7580.37	8024.3	1767.4	3966.07	3283.98	1808.44	2561.35	2071.88	3964.04	1902.24	2845.46	NoTM	outside	Nucleus;Chromosome;Cytoplasm;Secreted;Cell membrane;Endosome;Endoplasmic reticulum-Golgi intermediate compartment;Shuttles between the cytoplasm and the nucleus (PubMed:12231511, PubMed:17114460);Translocates from the nucleus to the cytoplasm upon autophagy stimulation (PubMed:20819940);Release from macrophages in the extracellular milieu requires the activation of NLRC4 or NLRP3 inflammasomes (B…	HMGB1	2.65618	1.40935	0.148787	0.827434	262	0.273155	0.56359
[K].HVVFGKVK.[E]	1xBiotin [K6]	2	10	P62937	P62937 [126-133]	P62937 1xBiotin [K131]	peptidyl-prolyl cis-trans isomerase A [OS=Homo sapiens]	1	1139.64	21528.5	28991	23310.7	12999.2	18959.5	22623.4	18866.6	22178.2	20184.3	20864.5	19853	15912.3	31463.1	33700.5	20704.3	23586.1	22135.5	19761.1	NoTM	outside	Cytoplasm;Secreted	PPIA	0.739293	-0.435783	0.148912	0.827071	263	0.272345	0.564881
[K].GVSKAVEHINK.[T]	1xBiotin [K4]	1	3	P06733-1	P06733-1 [61-71]	P06733-1 1xBiotin [K64]	alpha-enolase [OS=Homo sapiens]	1	1407.74	1815.87	4714.12	5870.44	1959.05	32973.5	35204.3	2065.19	29426.9	36051.5	2820.36	20521.4	17241.2	1857.36	5187.78	3863.85	1998.61	4129.45	2296.13	NoTM	outside	Cytoplasm;Cell membrane;Cytoplasm, myofibril, sarcomere, M line;ENO1 is localized to the M line;[Isoform MBP-1]: Nucleus;[Isoform MBP-1]: Nucleus	ENO1	5.656	2.49978	0.149247	0.826093	264	0.271924	0.565552
[R].VKLLLQVQHASK.[Q]	1xBiotin [K2]	3	2	P12236	P12236 [32-43]	P12236 1xBiotin [K33]	ADP/ATP translocase 3 [OS=Homo sapiens]	1	1589.92	2392.97	7446.57	5388.02	8245.04	7749.79	7229.87	6796.3	7674.7	6424.47	4363.46	3933.72	2701.1	3356.99	1747.61	9116.74	2685.71	3216.09	4198.29	HasTM	inside	Mitochondrion inner membrane;Multi-pass membrane protein	SLC25A6	1.52518	0.608976	0.149388	0.825685	265	0.271153	0.566786
[K].VTQQGLKMVVPGLDGAQIPR.[D]	1xBiotin [K7]	1	3	P49327	P49327 [1152-1171]	P49327 1xBiotin [K1158]	Fatty acid synthase [OS=Homo sapiens]	1	2333.25	3534.82	2252.23	2286.85	2935.93	4444.54	6170.22	3577.21	5251.09	2558.57	2817.84	3276.5	3375.32	2930.22	4026.26	1990.59	2187.91	2698.07	1724.48	NoTM	outside	Cytoplasm;Melanosome	FASN	1.67833	0.747028	0.149555	0.825198	266	0.270437	0.567934
[R].LSVDYGKK.[S]	1xBiotin [K]	8	15	P68363	P68363 [157-164]	P68363 1xBiotin [K]	Tubulin alpha-1B chain [OS=Homo sapiens]	1	1135.58	20647.6	21170.5	17542.9	22537.2	20730.8	25116.6	37435.8	19460.9	21794.4	15257.7	15992.8	16460.2	23362.8	13588.8	15030.2	3287.49	15248.5	10951.5	NoTM	outside	Cytoplasm, cytoskeleton	TUBA1B	1.15201	0.204158	0.152165	0.817686	267	0.274124	0.562053
[R].SGKPAELLK.[M]	1xBiotin [K3]	2	11	P29401	P29401 [595-603]	P29401 1xBiotin [K597]	Transketolase [OS=Homo sapiens]	0	1168.64	31777.6	37055.1	30604.6	26569	27790.7	31748.5	26358.9	23742.2	28022.3	25286.9	27033.8	28297.2	48227.4	38380.4	34236.9	32365.9	29479.3	24195.3	NoTM	outside	NO_DATA	TKT	0.865955	-0.207637	0.153367	0.814268	268	0.27526	0.560257
[R].TGLIKGSGTAEVELK.[K]	1xBiotin [K5]	3	7	P14618	P14618 [121-135]	P14618 1xBiotin [K125]	Pyruvate kinase PKM [OS=Homo sapiens]	1	1728.92	2099.77	3314.9	6841.84	5821.26	6429.51	9085.44	4013.69	6361.33	10996.9	8593.04	6286.88	6090.8	8356.51	8529.73	5872.99	3488.72	5073.41	6695.95	NoTM	outside	Cytoplasm;Nucleus;Nuclear translocation is sufficient to induce cell death that is caspase independent, isoform-specific and independent of its enzymatic activity	PKM	1.74081	0.799756	0.156903	0.804368	269	0.280559	0.551976
[KR].VFYLKMK.[G]	1xBiotin [K5]	9	2	P63104-1; P31947-1	P63104-1 [116-122]; P31947-1 [118-124]	P63104-1 1xBiotin [K120]; P31947-1 1xBiotin [K122]	14-3-3 protein zeta/delta [OS=Homo sapiens] 14-3-3 protein sigma [OS=Homo sapiens]	1	1154.61	2582.68	4145.45	2218.07	2833.85	7590.01	10255.9	2425	11589.5	9010.5	2984.06	6147.07	3796.68	2523.41	2987.86	2548.64	2515.9	2812.51	2550.02	NoTM	outside	Cytoplasm;Melanosome	YWHAZ	2.31156	1.20887	0.157113	0.803788	270	0.279894	0.553007
[R].EMHKTLK.[L]	1xBiotin [K4]; 1xOxidation [M2]	3	4	Q96L93-1	Q96L93-1 [1226-1232]	Q96L93-1 1xBiotin [K1229]	Kinesin-like protein KIF16B [OS=Homo sapiens]	1	1128.55	1.81385e+06	2.77342e+06	1.2822e+06	1.4284e+06	1.09332e+06	972674	1.27626e+06	1.01835e+06	1.21443e+06	1.38874e+06	1.25096e+06	1.04278e+06	5.09295e+06	2.33933e+06	2.02717e+06	4.09452e+06	2.80627e+06	2.3404e+06	NoTM	outside	Cytoplasm, cytoskeleton;Early endosome membrane	KIF16B	0.595351	-0.748188	0.158346	0.800392	271	0.28105	0.551216
[R].KLLEGEECR.[MLI]	1xBiotin [K1]; 1xCarbamidomethyl [C8]	11	4	P35908; P04259; P02538; P13647	P35908 [482-490]; P04259 [467-475]; P02538 [467-475]; P13647 [472-480]	P35908 1xBiotin [K482]; P04259 1xBiotin [K467]; P02538 1xBiotin [K467]; P13647 1xBiotin [K472]	Keratin, type II cytoskeletal 2 epidermal [OS=Homo sapiens] keratin, type II cytoskeletal 6B [OS=Homo sapiens] Keratin, type II cytoskeletal 6A [OS=Homo sapiens] keratin, type II cytoskeletal 5 [OS=Homo sapiens]	1	1359.64	2232.32	11037.9	3699.76	7506.97	12586.1	15164.6	14591.3	15225.1	16039.7	5246.64	8275.51	2597.86	7610.16	2233.46	3149.12	1913.76	3667.75	2517.61	NoTM	outside	NO_DATA	KRT2	2.07764	1.05495	0.1595	0.79724	272	0.282057	0.549664
[R].LPLQDVYKIGGIGTVPVGR.[V]	1xBiotin [K8]	4	4	P68104	P68104 [248-266]	P68104 1xBiotin [K255]	Elongation factor 1-alpha 1 [OS=Homo sapiens]	1	2208.22	3194.96	4645.26	2939.97	3352.34	7441.59	8300.82	3655	7388.64	5908.34	3246.53	7338.86	3779.86	2022.59	2165.04	5833.98	3088.18	3584.96	7889.89	NoTM	outside	Cytoplasm;Nucleus;Nucleus, nucleolus;Cell membrane;Translocates together with ZPR1 from the cytoplasm to the nucleus and nucleolus after treatment with mitogens (PubMed:8650580);Localization at the cell membrane depends on EEF1A1 phosphorylation status and the presence of PPP1R16B (PubMed:26497934)	EEF1A1	1.77128	0.824793	0.161545	0.791707	273	0.284627	0.545725
[R].KATGPPVSELITK.[A]	1xBiotin [K1]	1	4	P16401	P16401 [37-49]	P16401 1xBiotin [K37]	Histone H1.5 [OS=Homo sapiens]	1	1566.86	1751.04	3406.01	3508.17	3550.77	6054.89	11604.9	5263.53	10292.2	5085.77	3082.79	4660.73	2392.47	3015.26	3242.08	4064.87	2866.53	3671.2	3699.95	NoTM	outside	Nucleus;Chromosome;According to PubMed:10997781 associates with actively transcribed chromatin and not heterochromatin	HIST1H1B	2.44778	1.29147	0.16264	0.788773	274	0.28551	0.544379
[R].KQEIVAEK.[E]	1xBiotin [K1]	3	1	Q9ULV4	Q9ULV4 [205-212]	Q9ULV4 1xBiotin [K205]	coronin-1C [OS=Homo sapiens]	1	1170.62	4142.49	2084	2323.6	3433.42	4292.25	6325.19	2008.54	4012.02	4635.51	1755.29	2407.5	3640.49	2750.43	1887.79	3809.58	2928.47	2761.9	3591.03	NoTM	outside	Cell membrane;Cell projection, lamellipodium;Cell projection, ruffle membrane;Cytoplasm, cytoskeleton;Cytoplasm, cell cortex;Endosome membrane;Colocalizes with F-actin at the leading edge of lamellipodia;Partially colocalizes with microtubules and vimentin intermediate filaments (PubMed:10828594, PubMed:19651142, PubMed:25074804);Localizes to endosome membrane tubules/buds (PubMed:30220460);[Isof…	CORO1C	1.64336	0.716649	0.163538	0.78638	275	0.286044	0.543568
[K].DYSSGFGGKYGVQADR.[V]	1xBiotin [K9]	3	11	Q14247-1	Q14247-1 [153-168]	Q14247-1 1xBiotin [K161]	Src substrate cortactin [OS=Homo sapiens]	1	1932.85	2016.65	16853	15818.9	2136.56	3570.05	4587.97	2264.64	3807.75	3380.52	2238.29	3502.43	2610.35	21761.4	19528.8	17970.9	20992	16176.9	15261.1	NoTM	outside	Cytoplasm, cytoskeleton;Cell projection, lamellipodium;Cell projection, ruffle;Cell projection, dendrite;Cell projection;Cell membrane;Cell projection, podosome;Cell junction;Cell junction, focal adhesion;Membrane, clathrin-coated pit;Cell projection, dendritic spine;Cytoplasm, cell cortex;Associated with membrane ruffles and lamellipodia;In the presence of CTTNBP2NL, colocalizes with stress fibe…	CTTN	0.296772	-1.75258	0.167907	0.774932	276	0.29262	0.533696
[K].AEMNGSKLGR.[R]	1xBiotin [K7]	1	4	P16422	P16422 [71-80]	P16422 1xBiotin [K77]	Epithelial cell adhesion molecule [OS=Homo sapiens]	1	1288.61	2060.94	2787.5	3662.46	3022.45	7249.3	13184.8	5470.65	7417.93	8314.66	2698.24	5070.26	2443.81	3945.56	3156.33	3521.66	1759.38	3882.57	4069.71	HasTM	outside	Lateral cell membrane;Cell junction, tight junction	EPCAM	2.75606	1.46261	0.170285	0.768825	277	0.295693	0.52916
[K].KVTHAVVTVPAYFNDAQR.[Q]	1xBiotin [K1]	1	2	P11021	P11021 [164-181]	P11021 1xBiotin [K164]	78 kDa glucose-regulated protein [OS=Homo sapiens]	1	2242.14	2840.5	2560.38	3249.17	2639.54	5427.21	7038.66	2833.95	5573.76	3695.06	3062.81	3198.11	2863.85	3488.26	3589.17	2563.05	3377.1	4161.58	4104.39	NoTM	outside	Endoplasmic reticulum lumen;Melanosome;Cytoplasm	HSPA5	1.74628	0.804285	0.173333	0.76112	278	0.299903	0.52302
[R].NFLKEDAMKTK.[T]	1xBiotin [K9]; 1xOxidation [M8]	1	3	Q29983	Q29983 [167-177]	Q29983 1xBiotin [K175]	MHC class I polypeptide-related sequence A [OS=Homo sapiens]	2	1566.77	2812.14	1748.9	3902.49	33842.4	10506.6	6503.99	50177.8	10046.9	14520.4	54036.3	8794.13	13568.6	3603.5	1794.55	2097.43	2613.82	3996	4046.51	HasTM	outside	Cell membrane;Cytoplasm;Infection with human adenovirus 5 suppresses cell surface expression due to the adenoviral E3-19K protein which causes retention in the endoplasmic reticulum	MICA	6.00847	2.587	0.173637	0.760359	279	0.299352	0.523818
[R].SGKPAELLKMFGIDR.[D]	1xBiotin [K9]	2	5	P29401	P29401 [595-609]	P29401 1xBiotin [K603]	Transketolase [OS=Homo sapiens]	1	1887.98	3823.61	3599.86	5274	2927.74	14221.5	15209.7	3507.64	19273.5	7950.86	3573.25	6816.81	2944.92	2413.03	3664.22	12761	3565.7	8434.96	8340.04	NoTM	outside	NO_DATA	TKT	2.54846	1.34962	0.174493	0.758223	280	0.299754	0.523236
[K].YIQKQISYNYSDLDQSNVTEETPEGEEHHPVADTENK.[E]	1xBiotin [K4]	2	1	Q8NC51-1	Q8NC51-1 [237-273]	Q8NC51-1 1xBiotin [K240]	Plasminogen activator inhibitor 1 RNA-binding protein [OS=Homo sapiens]	1	4534.03	3323.08	4082.99	2817.65	3807.1	17528.1	8780.82	2618.65	12835.1	3485.42	4172.93	12910.5	3186.49	2544.45	2480.52	3845.86	3733.89	4048.84	3971.06	NoTM	outside	Cytoplasm;Nucleus;Cytoplasm, perinuclear region	SERBP1	2.9457	1.55861	0.17502	0.756912	281	0.299589	0.523474
[R].TPKIVSGK.[DV]	1xBiotin [K3]	5	1	P00338-1	P00338-1 [74-81]	P00338-1 1xBiotin [K76]	L-lactate dehydrogenase A chain [OS=Homo sapiens]	1	1055.59	1859.09	1872.42	7810.89	4139.46	11118.8	11670.3	9934.89	10589.7	11848.2	3279.78	9512.36	9014.75	3682.64	7923.75	4168.85	2457.48	4554.92	5124.49	NoTM	outside	Cytoplasm	LDHA	2.33301	1.22219	0.176717	0.752721	282	0.301422	0.520825
[K].AGDSLMVMIAMKMEHTIK.[S]	1xBiotin [K]; 2xOxidation [M]	1	91	Q96RQ3	Q96RQ3 [670-687]	Q96RQ3 1xBiotin [K]	Methylcrotonoyl-CoA carboxylase subunit alpha, mitochondrial [OS=Homo sapiens]	1	2264.06	349203	179738	286935	259945	114949	70904.8	68513.1	119814	109044	113393	101131	77318.6	182663	160310	207117	263288	115949	107115	NoTM	outside	Mitochondrion matrix	MCCC1	0.546405	-0.871956	0.177923	0.749769	283	0.302405	0.51941
[R].KVIDDTNITR.[L]	1xBiotin [K1]	1	8	P05783	P05783 [187-196]	P05783 1xBiotin [K187]	Keratin, type I cytoskeletal 18 [OS=Homo sapiens]	1	1400.72	15479	18956.7	17531	18389.9	20829.6	28816.4	23977.9	25260.9	28380.8	14261.2	14972.9	9137.2	38329.8	22585.7	19771.3	8556.78	10550	9954.51	NoTM	outside	Cytoplasm, perinuclear region;Nucleus, nucleolus	KRT18	1.30922	0.388707	0.180553	0.743394	284	0.305797	0.514567
[K].ASGPPVSELITKAVAASK.[E]	1xBiotin [K12]	3	11	P10412	P10412 [35-52]	P10412 1xBiotin [K46]	Histone H1.4 [OS=Homo sapiens]	1	1952.05	3471.23	2731.03	1946.81	2175.5	8836.17	14398	3673.89	12480.9	6806.24	2851.93	5991.41	6996.72	3945.35	4025.26	2540.73	2944.62	2224.79	4043.99	NoTM	outside	Nucleus;Chromosome;Dysplays a punctuate staining pattern in the nucleus	HIST1H1E	3.11811	1.64067	0.181403	0.741356	285	0.306157	0.514056
[-].MPEPAKSAPAPK.[K]	1xBiotin [K6]; 1xMet-loss [N-Term]	5	1	Q16778; O60814	Q16778 [1-12]; O60814 [1-12]	Q16778 1xBiotin [K6]; 1xMet-loss [N-Term]; O60814 1xBiotin [K6]; 1xMet-loss [N-Term]	Histone H2B type 2-E [OS=Homo sapiens] Histone H2B type 1-K [OS=Homo sapiens]	1	1318.68	2533.34	3080.43	3612.78	2752.83	6344.76	8907	3446.63	6367.44	8917.6	2658.37	3786.17	3635.46	2195.91	3085.7	3865.93	2995.8	3609.94	2216.16	NoTM	outside	Nucleus;Chromosome	HIST2H2BE	1.95139	0.964501	0.181622	0.740831	286	0.305456	0.515052
[K].SPAKSPNPSTPR.[G]	1xBiotin [K4]	2	3	O76021	O76021 [392-403]	O76021 1xBiotin [K395]	Ribosomal L1 domain-containing protein 1 [OS=Homo sapiens]	1	1464.73	3656.44	1984.96	2523.24	2830	4192.89	5451.22	2857.65	5115.92	5606.71	7036.67	8856.36	10513.4	7282.2	3687.02	3847.02	8683.09	5465.64	4086.99	NoTM	outside	Nucleus, nucleolus	RSL1D1	1.52782	0.611476	0.186888	0.728419	287	0.313216	0.504156
[R].EMLQQSKILK.[VY]	1xBiotin [K7]; 1xOxidation [M2]	4	4	P07900; P08238	P07900 [401-410]; P08238 [393-402]	P07900 1xBiotin [K407]; P08238 1xBiotin [K399]	Heat shock protein HSP 90-alpha [OS=Homo sapiens] Heat shock protein HSP 90-beta [OS=Homo sapiens]	1	1459.76	1776.75	5148.7	3166.6	9431.09	6024.14	3732.73	9219.52	5992.9	8560.2	5495.62	4715.05	5408.2	13350.6	9851.19	4396.05	4054.32	3585.02	3291.66	NoTM	outside	Nucleus;Cytoplasm;Melanosome;Cell membrane	HSP90AA1	1.90129	0.926982	0.18999	0.721269	288	0.31731	0.498516
[R].LAGAPSEDPQFPKVQWPPR.[E]	1xBiotin [K13]	2	10	O00391	O00391 [488-506]	O00391 1xBiotin [K500]	Sulfhydryl oxidase 1 [OS=Homo sapiens]	1	2346.17	2814.68	12313.8	14726	2299.95	4375.51	5520.21	1841.89	2999.19	3164.54	3044.69	3639.98	3116.77	9974.9	11117	21098.9	3186.65	16409.8	18611.8	HasTM	outside	[Isoform 1]: Golgi apparatus membrane;Secreted;[Isoform 2]: Secreted;[Isoform 2]: Secreted	QSOX1	0.408504	-1.29158	0.192133	0.716399	289	0.319778	0.495152
[R].ISVYYNEATGGKYVPR.[A]	1xBiotin [K12]	1	25	P07437	P07437 [47-62]	P07437 1xBiotin [K58]	tubulin beta chain [OS=Homo sapiens]	1	2043	3686.51	18956.2	16219.2	16054.5	22982.6	25553.6	20195.2	29364.6	23154.9	31308.4	22714.5	23119.7	20185.5	27864.9	22068.8	11305	21423.6	18108.5	NoTM	outside	Cytoplasm, cytoskeleton	TUBB	1.66206	0.73297	0.193295	0.713779	290	0.320603	0.494032
[R].KESYSIYVYK.[V]	1xBiotin [K1]	7	4	Q16778	Q16778 [35-44]	Q16778 1xBiotin [K35]	Histone H2B type 2-E [OS=Homo sapiens]	1	1505.73	3085.93	3487.64	3843.15	2561.41	8505.18	9778.7	1812.85	8029.46	8256.98	3558.13	6747.75	7642.14	1953.27	2699.35	4099.13	2458.53	2690.2	3241.37	NoTM	outside	Nucleus;Chromosome	HIST2H2BE	2.00114	1.00082	0.194816	0.710375	291	0.322016	0.492123
[R].LVKSQLQGLSASAGLLEQMR.[H]	1xBiotin [K3]	4	6	Q16787-1	Q16787-1 [233-252]	Q16787-1 1xBiotin [K235]	Isoform 1 of Laminin subunit alpha-3 [OS=Homo sapiens]	1	2355.25	1764.8	3704.03	2889.88	1880.95	8273.68	10675.7	3696.28	11935.7	4017.3	2381.41	3638.63	3703.11	2365.06	1973.19	11569.9	2276.56	2015.11	6302.52	NoTM	outside	Secreted, extracellular space, extracellular matrix, basement membrane	LAMA3	2.49205	1.31733	0.196338	0.706995	292	0.323421	0.490232
[R].EDSVKPGAHLTVKK.[I]	1xBiotin [K14]	2	1	P51991-1	P51991-1 [114-127]	P51991-1 1xBiotin [K127]	Heterogeneous nuclear ribonucleoprotein A3 [OS=Homo sapiens]	1	1734.92	1799.61	4043.61	4220.84	2429.58	9373.16	10188.8	3156.98	9122.87	5984.34	1978.6	4925.43	5564.24	3937.77	3812.74	2845.26	3681.89	2281.6	4565.01	NoTM	outside	Nucleus	HNRNPA3	2.18516	1.12774	0.198462	0.702324	293	0.325802	0.487046
[R].VNAKTYIEKEDD.[-]	1xBiotin [K4]	1	2	Q9H0G5	Q9H0G5 [547-558]	Q9H0G5 1xBiotin [K550]	Nuclear speckle splicing regulatory protein 1 [OS=Homo sapiens]	2	1650.77	3935.92	3208.58	7433.97	2239.43	2397.12	3619.44	1814.17	2428.25	1981.17	3649.81	3606.68	3798.34	9967.36	11497.5	19491.5	3022.71	11157.5	19435.3	NoTM	outside	Nucleus;Nucleus speckle	NSRP1	0.566314	-0.820325	0.200175	0.698589	294	0.327498	0.484791
[K].AVGKVIPELNGK.[L]	1xBiotin [K4]	2	20	P04406-1	P04406-1 [216-227]	P04406-1 1xBiotin [K219]	glyceraldehyde-3-phosphate dehydrogenase [OS=Homo sapiens]	1	1450.81	11079.3	15820.9	13654.5	12934.5	20495.6	19718.3	14436.7	20182	16293.3	15384.8	17413.4	18262.5	17427.4	21838.2	17425.6	15539.4	19795.9	18024.1	NoTM	outside	Cytoplasm, cytosol;Nucleus;Cytoplasm, perinuclear region;Membrane;Cytoplasm, cytoskeleton;Postnuclear and Perinuclear regions	GAPDH	1.31054	0.390157	0.203553	0.691323	295	0.331895	0.479
[R].GHPDPKLSWSQLGGSPAEPIPGR.[Q]	1xBiotin [K6]	1	11	P50895	P50895 [477-499]	P50895 1xBiotin [K482]	Basal cell adhesion molecule [OS=Homo sapiens]	1	2609.29	1956.04	10563.5	11115.8	8969.43	14440.3	19598.7	3005.11	19913.1	16529.6	3525.88	11658.3	3234.04	3989.85	8249.14	13298.7	1914.6	2849.59	2217.22	HasTM	outside	Membrane;Single-pass type I membrane protein	BCAM	1.81966	0.863672	0.20478	0.688713	296	0.332767	0.47786
[K].VFVRPTNSCMKTIGVHDR.[V]	1xBiotin [K11]; 1xCarbamidomethyl [C9]	1	5	P52803	P52803 [156-173]	P52803 1xBiotin [K166]	Ephrin-A5 [OS=Homo sapiens]	1	2343.15	4014.39	3944.84	2693.2	2270.82	11679.1	20181.5	3642.88	13886	9928.62	4061.65	6339.04	3427.73	3605.45	4036.06	3983.14	2721.67	3940.38	3204.8	NoTM	outside	Cell membrane;Membrane, caveola	EFNA5	3.20409	1.67991	0.206078	0.685969	297	0.333748	0.476581
[R].LVKSQLQGLSASAGLLEQMR.[H]	1xBiotin [K3]; 1xOxidation [M19]	4	12	Q16787-1	Q16787-1 [233-252]	Q16787-1 1xBiotin [K235]	Isoform 1 of Laminin subunit alpha-3 [OS=Homo sapiens]	1	2371.25	12473.5	15489.6	10556.7	24326.9	16785.2	13358.3	11275.6	16304.1	15190.2	3673.13	8448.34	4155.92	1874.67	13003.6	22410.3	10662.1	2183.26	9258.91	NoTM	outside	Secreted, extracellular space, extracellular matrix, basement membrane	LAMA3	1.41409	0.499873	0.207904	0.682137	298	0.335576	0.474209
[R].AMKTVFGVEPDLTR.[E]	1xBiotin [K3]; 1xOxidation [M2]	2	6	Q96KP4	Q96KP4 [400-413]	Q96KP4 1xBiotin [K402]	cytosolic non-specific dipeptidase [OS=Homo sapiens]	1	1805.89	12228.3	6237.83	3376.91	3325.7	4136.15	2440.92	6973.33	4027.6	3563.79	4513.48	1787.59	2550.75	10977	4220.23	8187.22	8886.3	7264.43	3989.81	NoTM	outside	Cytoplasm	CNDP2	0.453361	-1.14127	0.208003	0.681931	299	0.334613	0.475457
[K].NAKGSNYWR.[N]	1xBiotin [K3]	1	2	P30101	P30101 [272-280]	P30101 1xBiotin [K274]	Protein disulfide-isomerase A3 [OS=Homo sapiens]	1	1321.61	3538.98	3293.83	2860.32	3435.09	5925.9	3881.91	3131.38	4489.98	3197.39	2176.43	3621.77	1921.29	2007.31	2676.58	4710.54	2184.88	4062.88	3207.17	NoTM	outside	Endoplasmic reticulum;Endoplasmic reticulum lumen;Melanosome	PDIA3	1.36622	0.450185	0.209469	0.678881	300	0.335848	0.473857
[K].WSLLQQQKTAR.[S]	1xBiotin [K8]	2	3	P05787	P05787 [123-133]	P05787 1xBiotin [K130]	Keratin, type II cytoskeletal 8 [OS=Homo sapiens]	1	1584.83	3770.91	2679.12	2221.3	2856.21	5059.48	4281.77	3264.73	4282.12	4874.8	2072.34	2565.65	3702.42	3489.65	3832.56	3288.95	3884.33	2112.74	2484.76	NoTM	outside	Cytoplasm;Nucleus, nucleoplasm;Nucleus matrix	KRT8	1.40664	0.492257	0.212014	0.673636	301	0.3388	0.470057
[K].SSKGGPGSAVSPYPTFNPSSDVAALHK.[A]	1xBiotin [K3]	1	1	P04083	P04083 [27-53]	P04083 1xBiotin [K29]	annexin A1 [OS=Homo sapiens]	1	2884.39	2955.5	2091.75	1922.44	2220.64	4216.83	7441.29	3492.31	2099.42	2822.58	3378.06	3395.93	3156.68	3460.65	3041.43	1818.53	2848.56	3272.92	3511.73	NoTM	outside	Nucleus;Cytoplasm;Cell projection, cilium;Cell membrane;Membrane;Endosome membrane;Basolateral cell membrane;Apical cell membrane;Lateral cell membrane;Secreted;Secreted, extracellular space;Cell membrane;Secreted, extracellular exosome;Cytoplasmic vesicle, secretory vesicle lumen;Cell projection, phagocytic cup;Early endosome;Cytoplasmic vesicle membrane;Detected in exosomes and other extracellu…	ANXA1	1.9913	0.993712	0.212517	0.672606	302	0.338479	0.470468
[R].GFSNEVSSKNR.[I]	1xBiotin [K9]	1	1	Q9H0G5	Q9H0G5 [216-226]	Q9H0G5 1xBiotin [K224]	Nuclear speckle splicing regulatory protein 1 [OS=Homo sapiens]	1	1450.67	3602.81	3922.72	3527.45	3365.49	3637.49	2649.64	2211.95	1759.3	2832.09	2008.69	2091.89	4059.23	3714.06	10280.3	8997.64	3878.2	3237.44	11825.9	NoTM	outside	Nucleus;Nucleus speckle	NSRP1	0.873304	-0.195444	0.216694	0.664154	303	0.343992	0.463451
[K].TVDGPSGKLWR.[D]	1xBiotin [K8]	2	21	P04406-1	P04406-1 [187-197]	P04406-1 1xBiotin [K194]	glyceraldehyde-3-phosphate dehydrogenase [OS=Homo sapiens]	1	1441.73	22685.7	21036.1	22266.2	20869.7	27150.8	28549.1	26440	33475.8	32509.5	19859.6	24595.5	22185.4	31489.6	26496.9	25700.9	23898.9	20954.5	20500.5	NoTM	outside	Cytoplasm, cytosol;Nucleus;Cytoplasm, perinuclear region;Membrane;Cytoplasm, cytoskeleton;Postnuclear and Perinuclear regions	GAPDH	1.16036	0.214571	0.217587	0.662368	304	0.344274	0.463096
[R].NTKQEIAEINR.[M]	1xBiotin [K3]	3	4	P04259; P02538	P04259 [376-386]; P02538 [376-386]	P04259 1xBiotin [K378]; P02538 1xBiotin [K378]	keratin, type II cytoskeletal 6B [OS=Homo sapiens] Keratin, type II cytoskeletal 6A [OS=Homo sapiens]	1	1541.77	2298.85	5537.66	4861.44	5356.46	5218.61	7579.57	5590.57	6162.38	7617.5	3855.21	2909.64	3276.85	4031.54	6791.88	3518.97	1724.05	2956.51	2168.29	NoTM	outside	NO_DATA	KRT6B	1.42973	0.515744	0.218824	0.659905	305	0.345096	0.46206
[K].KSQIFSTASDNQPTVTIK.[V]	1xBiotin [K1]	1	3	P11021	P11021 [447-464]	P11021 1xBiotin [K447]	78 kDa glucose-regulated protein [OS=Homo sapiens]	1	2191.11	3009.28	3600.11	3554.71	3244.32	4412.64	5874.35	2405.4	4034.07	3508.05	4095.48	3708.74	2588.07	3085.42	3992.38	2449.45	4055.52	3436.96	3630.25	NoTM	outside	Endoplasmic reticulum lumen;Melanosome;Cytoplasm	HSPA5	1.33128	0.412818	0.225566	0.646727	306	0.354566	0.450303
[R].TKNISAISYINQR.[N]	1xBiotin [K2]	1	2	Q92541	Q92541 [554-566]	Q92541 1xBiotin [K555]	RNA polymerase-associated protein RTF1 homolog [OS=Homo sapiens]	1	1733.9	2672.81	3971.47	5488.14	2273.4	3581.89	2400.63	2708.59	3249.28	3613.37	2130.49	3239.91	1722.11	2313.77	3118.51	3626.81	3589.25	8338.75	8907	NoTM	outside	Nucleus, nucleoplasm	RTF1	0.680484	-0.555367	0.230319	0.637671	307	0.360858	0.442664
[R].KGLFFEHDLR.[G]	1xBiotin [K1]	1	1	O15234	O15234 [185-194]	O15234 1xBiotin [K185]	Protein CASC3 [OS=Homo sapiens]	1	1487.75	3368.34	13732.7	12871.2	4440.87	6007.15	5319.82	2560.34	4148.24	4939.99	2795.83	3937.24	3101.63	15989.5	16510.3	18667.6	8343.82	16078.7	14799.6	NoTM	outside	Cytoplasm;Cytoplasm, perinuclear region;Nucleus;Nucleus speckle;Cytoplasm, Stress granule;Cytoplasm, Cytoplasmic ribonucleoprotein granule;Cell projection, dendrite;Transported to the cytoplasm as part of the exon junction complex (EJC) bound to mRNA (PubMed:15166247);In nuclear speckles, colocalizes with MAGOH;Under stress conditions, colocalizes with FMR1 and TIA1, but not MAGOH and RBM8A EJC c…	CASC3	0.52608	-0.926645	0.23058	0.637178	308	0.360095	0.443583
[K].LTPEYLELKK.[Y]	1xBiotin [K]	1	2	O75477	O75477 [276-285]	O75477 1xBiotin [K]	erlin-1 [OS=Homo sapiens]	1	1459.79	2373.67	2225.76	1895.56	5231.49	2947.6	2211.12	2079.1	7010.44	3380.98	3733.93	2210.26	2922.82	7407.22	4141.74	4736.38	3636.19	3028.36	3173.62	HasTM	outside	Endoplasmic reticulum membrane	ERLIN1	1.59973	0.677826	0.231059	0.636277	309	0.359674	0.444091
[R].EKGPDPLQYMR.[A]	1xBiotin [K2]	3	2	P02458-1	P02458-1 [1161-1171]	P02458-1 1xBiotin [K1162]	Isoform 1 of Collagen alpha-1(II) chain [OS=Homo sapiens]	1	1559.73	3373.56	3243.86	7753.61	3788.07	1868.04	1906.49	2134.17	2654.69	2729.45	3412.78	2493.39	3740.52	6549.5	9164.46	6765.8	3570.74	15351.2	14975.3	NoTM	outside	Secreted, extracellular space, extracellular matrix	COL2A1	0.52624	-0.926208	0.23191	0.634681	310	0.359834	0.443898
[K].VEAKFINYVK.[N]	1xBiotin [K4]	2	3	P06748	P06748 [264-273]	P06748 1xBiotin [K267]	Nucleophosmin [OS=Homo sapiens]	1	1436.76	1975.67	4670.22	2826.55	3616.86	4350.07	5808.9	3888.8	6584.92	4847.22	2706.53	2229.07	1961.44	2828.33	2286.82	3794.13	3109.26	2645.46	2518.66	NoTM	outside	Nucleus, nucleolus;Nucleus, nucleoplasm;Cytoplasm, cytoskeleton, microtubule organizing center, centrosome;Has been found in the cytoplasm in patients with primary acute myelogenous leukemia (AML), but not with secondary AML;Can shuttle between cytoplasm and nucleus;Co- localizes with the methylated form of RPS10 in the granular component (GC) region of the nucleolus;Colocalized with nucleolin an…	NPM1	1.45431	0.540331	0.233664	0.631408	311	0.36139	0.442024
[K].IGHPAPNFKATAVMPDGQFK.[D]	1xBiotin [K9]; 1xOxidation [M14]	1	4	Q06830	Q06830 [8-27]	Q06830 1xBiotin [K16]	peroxiredoxin-1 [OS=Homo sapiens]	1	2368.16	4167.15	2471.19	3229.02	9886.21	6081.58	2765.3	10617	6245.76	8876.02	2435.96	5942.77	6274.89	2188.92	4512.85	4505.01	2260.52	2020.07	3450.8	NoTM	outside	Cytoplasm;Melanosome	PRDX1	1.89849	0.924854	0.234838	0.629232	312	0.362041	0.441242
[R].YVQKGEYR.[T]	1xBiotin [K4]	17	19	P16070	P16070 [155-162]	P16070 1xBiotin [K158]	CD44 antigen [OS=Homo sapiens]	1	1268.61	31085	28913.8	27789.3	31168.2	31811.9	48112.8	44091.4	44630.8	44034.1	28217.8	26113.7	26244.9	42590.7	31321.4	24580.8	9737.59	12753	13087.4	HasTM	outside	Cell membrane;Cell projection, microvillus;Co-localizes with RDX, EZR and MSN in microvilli;Localizes to cholesterol-rich membrane-bound lipid raft domains	CD44	1.26547	0.33967	0.239604	0.620506	313	0.368209	0.433905
[K].VLGTVKWFNVR.[N]	1xBiotin [K6]	4	4	P16989-1	P16989-1 [91-101]	P16989-1 1xBiotin [K96]	Y-box-binding protein 3 [OS=Homo sapiens]	1	1544.84	2999.02	5179.85	11473.9	3651.89	2457.89	3047.21	2104.9	2573.77	3225.1	3644.41	2670.17	3494.18	1903.17	4045.43	10740.1	2450.78	7408.64	9443.17	NoTM	outside	Cytoplasm;Nucleus	YBX3	0.465939	-1.10179	0.24413	0.612378	314	0.37397	0.427163
[R].HQGVMVGMGQKDSYVGDEAQSK.[R]	1xBiotin [K11]	6	4	P60709	P60709 [40-61]	P60709 1xBiotin [K50]	Actin, cytoplasmic 1 [OS=Homo sapiens]	1	2577.15	3585.97	3684.74	3531.57	3307.75	5177.09	8416.39	2626.05	5856.38	4936.99	2837.67	2031.15	3091.6	1737.78	2644.61	2285.76	2066.55	2663.16	2564.1	NoTM	outside	Cytoplasm, cytoskeleton;Nucleus	ACTB	1.5646	0.645792	0.244943	0.610936	315	0.374023	0.427101
[K].VIATKVLGTVK.[W]	1xBiotin [K5]	4	14	P16989-1	P16989-1 [86-96]	P16989-1 1xBiotin [K90]	Y-box-binding protein 3 [OS=Homo sapiens]	1	1354.81	2997.05	19667.4	22971.2	3535.13	9194.3	6998.84	2538.02	9041.29	9807.68	4301.55	6956.26	4875.11	11415.1	22007	22688.3	3448.59	25532.3	27128	NoTM	outside	Cytoplasm;Nucleus	YBX3	0.4323	-1.20989	0.248369	0.604903	316	0.378055	0.422445
[R].NTQIYKAQAQTDR.[E]	1xBiotin [K6]	8	11	P01889	P01889 [87-99]	P01889 1xBiotin [K92]	HLA class I histocompatibility antigen, B-7 alpha chain [OS=Homo sapiens]	1	1762.85	10986.1	3425.79	1773.78	9527.22	9524.69	8675.31	25374	11595.8	14349.7	20976.7	21173.5	18477.1	15010.4	2352.96	3638.56	9068.64	5486.01	2839.37	HasTM	outside	Cell membrane;Endoplasmic reticulum membrane	HLA-B	1.71308	0.77659	0.248375	0.604892	317	0.376872	0.423806
[R].GELALKDAR.[AN]	1xBiotin [K6]	3	3	P13647	P13647 [421-429]	P13647 1xBiotin [K426]	keratin, type II cytoskeletal 5 [OS=Homo sapiens]	1	1198.62	3004.64	8997	6778.19	7112.11	9920.55	9690.19	7969.2	11842.6	10385.6	2950.71	6383	3767.89	2910.94	1859.31	6572.46	2431.09	2019.05	4140.34	NoTM	outside	NO_DATA	KRT5	1.42296	0.508891	0.249554	0.602836	318	0.37747	0.423118
[R].KDAEEWFFTK.[T]	1xBiotin [K1]	1	2	P02533	P02533 [300-309]	P02533 1xBiotin [K300]	Keratin, type I cytoskeletal 14 [OS=Homo sapiens]	1	1526.7	2318.28	2206.65	3386.67	2364.07	4566.59	4062.78	3724.72	3943.51	3127.29	2781.89	4108.44	3303.95	2616.11	3644.79	3292.66	3292.8	2097.98	3061.98	NoTM	outside	Cytoplasm;Nucleus	KRT14	1.38953	0.474602	0.25051	0.601175	319	0.377728	0.42282
[K].EYFSKQK.[-]	1xBiotin [K5]	1	3	Q06830	Q06830 [193-199]	Q06830 1xBiotin [K197]	peroxiredoxin-1 [OS=Homo sapiens]	1	1155.55	2050.55	7023.92	8435.79	6915.16	8989.29	10331.4	5566.17	9183.17	9620.69	7879.44	9434.78	9798.24	8837.93	10232.5	6036.1	7339.08	7214.78	7525.81	NoTM	outside	Cytoplasm;Melanosome	PRDX1	1.49831	0.58334	0.252402	0.597908	320	0.379391	0.420912
[K].LNILKLAPGGHVGR.[F]	1xBiotin [K5]	1	2	P36578	P36578 [235-248]	P36578 1xBiotin [K239]	60S ribosomal protein L4 [OS=Homo sapiens]	1	1670.95	3831.87	5045.78	1966.08	3747.57	6010.28	5633.48	4026.24	7987.44	3631.56	3320.66	2507.18	3472.06	4840.98	3222.03	5309.84	3970.97	3509.55	2276.16	NoTM	outside	NO_DATA	RPL4	1.41938	0.505256	0.253221	0.5965	321	0.379437	0.42086
[R].IIGLKPEGVPR.[I]	1xBiotin [K5]	2	5	P54709	P54709 [178-188]	P54709 1xBiotin [K182]	sodium/potassium-transporting ATPase subunit beta-3 [OS=Homo sapiens]	0	1404.8	3463.54	6929.79	6903.95	2728.25	3642.07	5421.09	5368.17	6542.55	6384.93	3271	2882.29	1732.22	8429.98	7287.36	7189.23	3892.95	3080.07	2138.05	HasTM	outside	Cell membrane;Melanosome	ATP1B3	0.681692	-0.552809	0.25907	0.586583	322	0.386996	0.412294
[R].SAGKTSLVEEAEK.[H]	1xBiotin [K4]	4	7	Q16787-1	Q16787-1 [523-535]	Q16787-1 1xBiotin [K526]	Isoform 1 of Laminin subunit alpha-3 [OS=Homo sapiens]	1	1574.77	3337.43	7034.56	6844.24	5666.79	8428.31	9625.35	13636	13808.4	13944.1	7761.68	5598.81	1993.22	14572.4	8891.81	10883	3017.97	7751.09	7661.46	NoTM	outside	Secreted, extracellular space, extracellular matrix, basement membrane	LAMA3	1.3778	0.462363	0.266128	0.574909	323	0.396309	0.401966
[K].NIKLGIHEDSQNR.[K]	1xBiotin [K3]	2	5	P07900	P07900 [444-456]	P07900 1xBiotin [K446]	Heat shock protein HSP 90-alpha [OS=Homo sapiens]	1	1749.87	3131.79	3026.8	4949.06	2267.95	8068.86	10909.7	8281.85	8555.47	9064.03	6852.28	7533.18	6958.24	4994.77	4071.5	3413.93	1754.09	2737.95	2816.75	NoTM	outside	Nucleus;Cytoplasm;Melanosome;Cell membrane	HSP90AA1	1.91278	0.935674	0.266353	0.574543	324	0.395419	0.402943
[K].GKEYFAIDNSGR.[I]	1xBiotin [K2]	2	3	P33151	P33151 [196-207]	P33151 1xBiotin [K197]	Cadherin-5 [OS=Homo sapiens]	1	1582.73	3300.74	3547.16	2181.44	2969.9	3974.19	4337.2	3762.72	4928.91	3429.97	2198.95	2868.63	2539.76	3666.18	2287.78	2862.43	3679.9	3786.79	3488.99	HasTM	outside	Cell junction;Cell membrane;KRIT1 and CDH5 reciprocally regulate their localization to endothelial cell-cell junctions	CDH5	1.2494	0.32124	0.269676	0.569157	325	0.399121	0.398895
[K].VAKGQPLCVLSAMKMETVVTSPMEGTVR.[K]	1xBiotin [K14]; 1xCarbamidomethyl [C8]; 3xOxidation [M13; M15; M23]	1	5	P11498	P11498 [1131-1158]	P11498 1xBiotin [K1144]	pyruvate carboxylase, mitochondrial [OS=Homo sapiens]	2	3293.61	4042.14	5085.6	5618.57	20186.8	6218.09	6270.85	3613.1	3173.01	10948.9	2878.39	3982.03	2891.65	11466.7	24927.8	25396.1	38272	10878.1	26720.3	NoTM	outside	Mitochondrion matrix	PC	2.21586	1.14787	0.269856	0.568868	326	0.398162	0.39994
[K].QKDLSGFYR.[H]	1xBiotin [K2]	1	2	Q9H0G5	Q9H0G5 [177-185]	Q9H0G5 1xBiotin [K178]	Nuclear speckle splicing regulatory protein 1 [OS=Homo sapiens]	1	1339.65	2450.43	3628.27	4384.77	3025.81	1988.11	2949.92	3024.29	1857.37	3634.59	2659.7	4111.61	3748.51	2207.01	10928.9	13845.6	2810.61	4207.9	8013.93	NoTM	outside	Nucleus;Nucleus speckle	NSRP1	0.761109	-0.393825	0.271912	0.565571	327	0.399969	0.397974
[K].AKSETVLTCATGR.[A]	1xBiotin [K2]; 1xCarbamidomethyl [C9]	2	7	P26006	P26006 [896-908]	P26006 1xBiotin [K897]	Integrin alpha-3 [OS=Homo sapiens]	1	1619.79	2807.11	8773.51	8124.47	3475.96	5124.34	3659.52	5597	5067.31	5637	2568.98	4084.77	2853.24	13856.7	8985.54	7240.83	3048.67	4045.25	3706.9	HasTM	outside	Cell membrane;Cell membrane;Cell projection, invadopodium membrane;Cell projection, filopodium membrane	ITGA3	0.622165	-0.684631	0.274281	0.561804	328	0.402223	0.395533
[R].TKYETELNLR.[M]	1xBiotin [K2]	1	4	P02533	P02533 [202-211]	P02533 1xBiotin [K203]	Keratin, type I cytoskeletal 14 [OS=Homo sapiens]	1	1492.75	4142.06	2328.51	2691.79	2625.85	4861.13	5806.41	3016.68	4508.85	5254.76	3725.26	3126.25	1951.03	2366.49	4011.63	1906.65	3256.01	2928.73	2580.23	NoTM	outside	Cytoplasm;Nucleus	KRT14	1.45087	0.536917	0.276472	0.558349	329	0.404204	0.3934
[R].NTKHEISEMNR.[M]	1xBiotin [K3]	1	2	P13647	P13647 [381-391]	P13647 1xBiotin [K383]	keratin, type II cytoskeletal 5 [OS=Homo sapiens]	1	1584.73	3683.45	5655.49	8430.16	2575.7	15332.3	21050	2735.99	20067.1	20426.5	2361.42	7115.06	4992.07	2426.83	5474.06	4850.68	2646.96	5507.6	2928.85	NoTM	outside	NO_DATA	KRT5	2.19246	1.13255	0.278063	0.555856	330	0.405298	0.392225
[QK].SAVGFEYQGKTEK.[H]	1xBiotin [K10]	3	4	Q14247-1	Q14247-1 [135-147]; [209-221]	Q14247-1 1xBiotin [K144]; 1xBiotin [K218]	Src substrate cortactin [OS=Homo sapiens]	1	1669.79	3664.2	3932.54	3181.61	2704.41	3563.31	3258.64	3549.7	3233.62	3117.16	3293.93	2904.18	2747.77	6300.72	6322	4763.88	1822.13	7819.77	3553.41	NoTM	outside	Cytoplasm, cytoskeleton;Cell projection, lamellipodium;Cell projection, ruffle;Cell projection, dendrite;Cell projection;Cell membrane;Cell projection, podosome;Cell junction;Cell junction, focal adhesion;Membrane, clathrin-coated pit;Cell projection, dendritic spine;Cytoplasm, cell cortex;Associated with membrane ruffles and lamellipodia;In the presence of CTTNBP2NL, colocalizes with stress fibe…	CTTN	0.883842	-0.178139	0.279453	0.553691	331	0.406093	0.391374
[K].NLGIGKVSSFEEK.[M]	1xBiotin [K6]	2	4	P40926	P40926 [302-314]	P40926 1xBiotin [K307]	Malate dehydrogenase, mitochondrial [OS=Homo sapiens]	1	1633.83	1795.69	5683.18	5292.39	5411.06	5200.75	7498.15	9119.15	6143.39	6113.79	6216.25	4961.28	3272.63	3119.1	4561.3	2525.35	4156.56	4166.69	6596.53	NoTM	outside	Mitochondrion matrix	MDH2	1.41803	0.503883	0.283288	0.547771	332	0.410427	0.386764
[R].IGAEVYHNLKNVIK.[E]	1xBiotin [K10]	2	2	P06733-1	P06733-1 [184-197]	P06733-1 1xBiotin [K193]	alpha-enolase [OS=Homo sapiens]	1	1823.98	3465.77	3272.06	2258.37	3858.31	3041.71	3791.72	1771.92	2191.37	3063.72	1724.83	3184.03	1820.84	4069.82	3866.08	2073.87	2486.3	3796.16	4086.48	NoTM	outside	Cytoplasm;Cell membrane;Cytoplasm, myofibril, sarcomere, M line;ENO1 is localized to the M line;[Isoform MBP-1]: Nucleus;[Isoform MBP-1]: Nucleus	ENO1	1.18847	0.249109	0.283698	0.547143	333	0.409787	0.387442
[K].LKMAPVPLDDSNRPASLTK.[D]	1xBiotin [K2]; 1xOxidation [M3]	4	4	Q9NYF8-1	Q9NYF8-1 [549-567]	Q9NYF8-1 1xBiotin [K550]	Bcl-2-associated transcription factor 1 [OS=Homo sapiens]	1	2295.18	1939.95	10756.1	7210.34	3172.39	3570.01	3648.42	3013.97	1838.4	1921.45	3615.26	3995.32	1800.7	10192.8	6659.23	6688.62	12538.7	8398.97	8996.38	NoTM	outside	Cytoplasm;Nucleus;Nucleus speckle;Nucleus, nucleoplasm	BCLAF1	0.521983	-0.937926	0.28395	0.546757	334	0.408923	0.388359
[K].VFVRPTNSCMKTIGVHDR.[V]	1xBiotin [K11]; 1xCarbamidomethyl [C9]; 1xOxidation [M10]	1	4	P52803	P52803 [156-173]	P52803 1xBiotin [K166]	Ephrin-A5 [OS=Homo sapiens]	1	2359.15	3977.37	4161.3	2848.55	7193.11	4503.83	3524.14	2218.67	4135.75	8558.93	9164.39	3183.99	3230.87	2626.69	4028.57	2567.23	3589.2	1732.09	2694.25	NoTM	outside	Cell membrane;Membrane, caveola	EFNA5	1.38534	0.470245	0.29457	0.530812	335	0.422949	0.373712
[K].LLSKTPELNLDQFHDK.[T]	1xBiotin [K4]	3	4	P27824	P27824 [167-182]	P27824 1xBiotin [K170]	Calnexin [OS=Homo sapiens]	1	2124.08	1738.89	4006.73	6433.14	4431.87	7479.41	6079.03	2721.31	9784.43	6747.76	2823.33	1817.19	2889.44	2695.14	6096.29	6524.78	4013.25	3191.19	3399.59	HasTM	outside	Endoplasmic reticulum membrane;Endoplasmic reticulum;Melanosome;The palmitoylated form preferentially localizes to the perinuclear rough ER (PubMed:22314232)	CANX	1.47719	0.562852	0.296884	0.527413	336	0.425004	0.371607
[R].VDVAVNCAGIAVASKTYNLK.[K]	1xBiotin [K]; 1xCarbamidomethyl [C7]	2	3	Q99714-1	Q99714-1 [85-104]	Q99714-1 1xBiotin [K]	3-hydroxyacyl-CoA dehydrogenase type-2 [OS=Homo sapiens]	1	2319.18	3152.55	3991.07	4483.93	2976.19	3184.54	3812.96	3928.4	3294.52	4501.67	2043.53	2247.82	3310.43	2493.84	3691.98	8203.09	2736.87	4142.34	2665.74	NoTM	outside	Mitochondrion	HSD17B10	0.857764	-0.221347	0.299524	0.523568	337	0.427511	0.369053
[R].KLILDSAR.[A]	1xBiotin [K1]	2	5	P29401	P29401 [543-550]	P29401 1xBiotin [K543]	Transketolase [OS=Homo sapiens]	1	1141.64	25634	20945.6	21338.4	23458.4	23926.5	27753	31640.1	30227	25177.1	31418.3	26194.4	21549.7	30775.6	26932.4	21101.7	16017	18540.1	17076.4	NoTM	outside	NO_DATA	TKT	1.1063	0.145746	0.300618	0.521985	338	0.427803	0.368756
[K].VDSSKMDK.[V]	1xBiotin [K5]	2	3	Q86XP3-1	Q86XP3-1 [904-911]	Q86XP3-1 1xBiotin [K908]	ATP-dependent RNA helicase DDX42 [OS=Homo sapiens]	1	1135.51	3160.94	2624.6	8968.44	3396.16	2097.27	1837.81	2635.78	2436.56	2472.99	3454.65	2631.79	2274.21	2468.76	12264.5	13416.4	2459.49	7762.41	15210.2	NoTM	outside	Cytoplasm;Nucleus speckle;Nucleus, Cajal body	DDX42	0.496899	-1.00898	0.301526	0.520675	339	0.427829	0.36873
[R].TFQKWAAVVVPSGEEQR.[Y]	1xBiotin [K4]	32	6	P01889	P01889 [264-280]	P01889 1xBiotin [K267]	HLA class I histocompatibility antigen, B-7 alpha chain [OS=Homo sapiens]	1	2158.07	3354.95	3295.38	3072.51	1885.85	6544.1	7289.49	2353.6	8584.51	7003.58	13947.3	15224.4	11782.8	3313.94	4006.87	1994.72	3637.91	3873.41	3954.67	HasTM	outside	Cell membrane;Endoplasmic reticulum membrane	HLA-B	1.61675	0.693099	0.303125	0.518378	340	0.428833	0.367712
[K].EAAGKSSGPTSLFAVTVAPPGAR.[Q]	1xBiotin [K5]	2	15	Q00839	Q00839 [182-204]	Q00839 1xBiotin [K186]	Heterogeneous nuclear ribonucleoprotein U [OS=Homo sapiens]	1	2397.22	3905.04	17445.7	21143.5	4950.86	8307.17	9995.67	1798.37	4138.96	7721.58	14095.8	15242.8	13658.9	19350.6	17890.7	16151.8	16431.4	29011.4	30840.7	NoTM	outside	Nucleus;Nucleus matrix;Chromosome;Nucleus speckle;Cytoplasm, cytoskeleton, microtubule organizing center, centrosome;Chromosome, centromere, kinetochore;Cytoplasm, cytoskeleton, spindle;Cytoplasm, cytoskeleton, spindle pole;Midbody;Cytoplasm;Cell surface;Cytoplasmic granule;Localizes in the nucleus during interphase (PubMed:21242313);At metaphase, localizes with mitotic spindle microtubules (MTs)…	HNRNPU	0.547219	-0.869809	0.304174	0.516877	341	0.429055	0.367487
[K].SAVGHEYQSKLSK.[H]	1xBiotin [K10]	3	3	Q14247-1	Q14247-1 [98-110]	Q14247-1 1xBiotin [K107]	Src substrate cortactin [OS=Homo sapiens]	1	1659.82	3697.49	3951.62	3440.92	3043.24	5145.63	8013.5	2771.28	4862.39	4949.4	2261.94	3234.77	3169.96	3226	2086.75	2395.7	2372.92	1810.09	3996.04	NoTM	outside	Cytoplasm, cytoskeleton;Cell projection, lamellipodium;Cell projection, ruffle;Cell projection, dendrite;Cell projection;Cell membrane;Cell projection, podosome;Cell junction;Cell junction, focal adhesion;Membrane, clathrin-coated pit;Cell projection, dendritic spine;Cytoplasm, cell cortex;Associated with membrane ruffles and lamellipodia;In the presence of CTTNBP2NL, colocalizes with stress fibe…	CTTN	1.46098	0.546941	0.304489	0.516428	342	0.428244	0.368309
[K].KHVNPVQALSEFK.[A]	1xBiotin [K1]	3	1	P35221	P35221 [889-901]	P35221 1xBiotin [K889]	Catenin alpha-1 [OS=Homo sapiens]	1	1722.9	10635.7	7423.04	7722.4	6345.61	7131.84	8273.5	2282.93	8764.94	8078.76	6174.88	6893.92	6245.29	7851.1	12753.4	8193.61	2041.63	8855.81	9099.23	NoTM	outside	[Isoform 1]: Cytoplasm, cytoskeleton;Cell junction, adherens junction;Cell membrane;Peripheral membrane protein;Cytoplasmic side;Cell junction;[Isoform 3]: Cell membrane;[Isoform 3]: Cell membrane	CTNNA1	0.843677	-0.245238	0.31399	0.503084	343	0.440319	0.356233
[R].GSSIFGLAPGKAR.[D]	1xBiotin [K11]	2	4	P05187	P05187 [393-405]	P05187 1xBiotin [K403]	alkaline phosphatase, placental type [OS=Homo sapiens]	1	1486.78	3585.67	6887.96	7240.65	5076.94	10106.3	9164.74	8062.49	11813.7	11981.6	3689.06	6080.68	7115.17	3073.92	6111.66	6338.48	3248.91	3855.77	2542.02	NoTM	outside	Cell membrane;Lipid-anchor, GPI-anchor	ALPP	1.37448	0.458887	0.316527	0.49959	344	0.442585	0.354003
[R].KWEAAHEAEQLR.[A]	1xBiotin [K1]	1	7	P04439	P04439 [170-181]	P04439 1xBiotin [K170]	HLA class I histocompatibility antigen, A-3 alpha chain [OS=Homo sapiens]	1	1693.81	794652	273601	432607	188878	136422	513342	462765	265114	179609	520468	198150	458573	459163	292024	350887	495795	240565	281234	HasTM	outside	NO_DATA	HLA-A	0.558774	-0.839663	0.318876	0.496378	345	0.444578	0.352052
[R].YSLKIQPVEK.[M]	1xBiotin [K4]	2	1	Q4G148-1	Q4G148-1 [106-115]	Q4G148-1 1xBiotin [K109]	Glucoside xylosyltransferase 1 [OS=Homo sapiens]	1	1430.77	2110.7	5519.04	4433.86	2696.87	2180.74	3543.2	3423.61	1941.75	3274.17	3087.73	3597.35	1958.3	4134.01	3625.29	5900.27	1744.82	9205.19	7054.41	HasTM	outside	Membrane	GXYLT1	0.698035	-0.518629	0.32414	0.489267	346	0.450611	0.346198
[K].LKEPWPNSDPPFSFK.[N]	1xBiotin [K2]	5	3	P16144-1	P16144-1 [190-204]	P16144-1 1xBiotin [K191]	Integrin beta-4 [OS=Homo sapiens]	1	2014.97	2120.13	3384.65	2238.32	2456.63	5213.87	3166.49	4712.18	7395.58	2702.15	5997.41	14042.3	3271.74	3004.24	3568.46	3956.56	4073.88	2145.75	3918.35	NoTM	outside	Cell membrane;Single-pass type I membrane protein;Cell membrane;Lipid-anchor;Cell junction, hemidesmosome	ITGB4	1.39957	0.484982	0.324906	0.488242	347	0.450374	0.346426
[K].AAFQSQYKSHFVAASLSNQK.[A]	1xBiotin [K8]	2	26	Q86XP3-1	Q86XP3-1 [701-720]	Q86XP3-1 1xBiotin [K708]	ATP-dependent RNA helicase DDX42 [OS=Homo sapiens]	1	2438.19	69879.7	73550.4	91775.5	54301.8	75914.6	73078.1	37047.3	79240.2	72181.5	46367.9	66110.4	55093	88001.9	103505	103511	88668.6	93959.7	118878	NoTM	outside	Cytoplasm;Nucleus speckle;Nucleus, Cajal body	DDX42	0.864327	-0.210351	0.329203	0.482536	348	0.455019	0.341971
[K].GILAADESTGSIAKR.[L]	1xBiotin [K14]	2	6	P04075	P04075 [29-43]	P04075 1xBiotin [K42]	fructose-bisphosphate aldolase A [OS=Homo sapiens]	1	1714.88	3827.19	3341.02	4335.45	3366.79	4834.44	5830	5176.96	6125.24	5907.3	2391.09	3465.76	2396.66	3178.25	7205.3	5636.6	2484.34	3305.45	2983.3	NoTM	outside	Cytoplasm, myofibril, sarcomere, I band;Cytoplasm, myofibril, sarcomere, M line	ALDOA	1.21972	0.286549	0.335819	0.473895	349	0.462834	0.334575
[K].AGLVIGKGGETIK.[Q]	1xBiotin [K7]	3	2	Q96AE4	Q96AE4 [197-209]	Q96AE4 1xBiotin [K203]	Far upstream element-binding protein 1 [OS=Homo sapiens]	1	1468.82	1972.82	7931.37	8538.99	2502.75	2508.98	5722.31	3561.17	3851.89	4258.29	3745.05	1733.85	1815.21	3781.16	14257.5	10416.9	3917.57	8412.69	8105.66	NoTM	outside	Nucleus	FUBP1	0.582006	-0.780893	0.3362	0.473403	350	0.462034	0.335326
[K].VKVGVNGFGR.[I]	1xBiotin [K2]	1	4	P04406-1	P04406-1 [4-13]	P04406-1 1xBiotin [K5]	glyceraldehyde-3-phosphate dehydrogenase [OS=Homo sapiens]	1	1258.67	11373.9	17545.7	14823.9	13233.6	18276.8	23706.6	21785.2	17731	27165.5	11528.1	14434.4	12119.7	16922.6	23970.2	13011.6	9807.78	11509.7	11116	NoTM	outside	Cytoplasm, cytosol;Nucleus;Cytoplasm, perinuclear region;Membrane;Cytoplasm, cytoskeleton;Postnuclear and Perinuclear regions	GAPDH	1.26229	0.33604	0.337369	0.471895	351	0.46232	0.335057
[K].KPKNENPVDYTVQIPPSTTYAITPMK.[R]	1xBiotin [K]; 1xOxidation [M25]	7	21	Q12906-1	Q12906-1 [346-371]	Q12906-1 1xBiotin [K]	Interleukin enhancer-binding factor 3 [OS=Homo sapiens]	1	3174.58	2099.7	21712.3	35978.8	24073.4	34308.8	35145.4	6534.72	36282.2	33173.5	20803.2	32255.8	21474.3	13160.7	26010.6	43991.8	27036	41995.5	44328.3	NoTM	outside	Nucleus, nucleolus;Cytoplasm;Nucleus;The unphosphorylated form is retained in the nucleus by ILF2;Phosphorylation at Thr-188 and Thr-315 causes the dissociation of ILF2 from the ILF2-ILF3 complex resulting in a cytoplasmic sequestration of ILF3;Localized in cytoplasmic mRNP granules containing untranslated mRNAs	ILF3	1.56425	0.645469	0.342269	0.465632	352	0.467703	0.33003
[K].KLSSWDQAETPGHTPSLR.[W]	1xBiotin [K1]	1	5	O75533-1	O75533-1 [214-231]	O75533-1 1xBiotin [K214]	splicing factor 3B subunit 1 [OS=Homo sapiens]	1	2236.08	2129.5	7663.88	12289.4	1802.83	4665.07	5476.14	2313.85	6011.29	4585.9	2772.77	3826.96	3658.76	9711.83	9083.02	7099.59	2392.85	13033.6	13416.5	NoTM	outside	Nucleus;Nucleus speckle	SF3B1	0.540875	-0.886633	0.342523	0.465311	353	0.466724	0.33094
[K].GQPLCVLSAMKMETVVTSPMEGTVR.[K]	1xBiotin [K11]; 1xCarbamidomethyl [C5]; 3xOxidation [M10; M12; M20]	1	464	P11498	P11498 [1134-1158]	P11498 1xBiotin [K1144]	pyruvate carboxylase, mitochondrial [OS=Homo sapiens]	1	2995.41	7.86478e+06	4.18336e+06	3.22501e+06	6.05236e+06	1.67343e+06	682680	5.22463e+06	1.05373e+06	2.17974e+06	5.89407e+06	3.20471e+06	7.25353e+06	1.65899e+06	1.50305e+06	2.11103e+06	5.90706e+06	1.48983e+06	1.44311e+06	NoTM	outside	Mitochondrion matrix	PC	0.55054	-0.861082	0.35172	0.453803	354	0.477902	0.320661
[K].SKITVTSEVPFSK.[R]	1xBiotin [K2]	1	5	P35268	P35268 [68-80]	P35268 1xBiotin [K69]	60S ribosomal protein L22 [OS=Homo sapiens]	1	1648.86	2536.32	2204.42	5650.85	2996.88	6102.77	6012.54	3441.54	3802.39	5168.55	2829.43	3059.16	2862.48	6280.2	6418.54	6735.05	2232.49	3220.5	3923.82	NoTM	outside	NO_DATA	RPL22	1.45427	0.540296	0.353035	0.452182	355	0.478337	0.320266
[R].KGLLPTPDEFPR.[F]	1xBiotin [K1]	1	1	Q9C0J8	Q9C0J8 [1161-1172]	Q9C0J8 1xBiotin [K1161]	pre-mRNA 3' end processing protein WDR33 [OS=Homo sapiens]	1	1595.83	2462.89	1927.35	3581.7	2239.25	1790.83	2345.05	3404.29	2888.16	3338.86	2984.04	4124.68	3131.24	2550.46	3243.89	6037.11	1905.33	2094.36	1868.7	NoTM	outside	Nucleus	WDR33	0.799697	-0.322475	0.360677	0.442881	356	0.487319	0.312186
[K].SFQKIQVR.[L]	1xBiotin [K4]	1	6	P62081	P62081 [71-78]	P62081 1xBiotin [K74]	40S ribosomal protein S7 [OS=Homo sapiens]	1	1231.66	9769.04	6732.6	6020.61	7207.77	5790.14	5667.4	12352.2	7441.64	7137	10149.8	7349.93	7224.07	9040.82	6453.44	6033.88	6815.97	6251.97	5696.97	NoTM	outside	Cytoplasm, cytoskeleton, microtubule organizing center, centrosome	RPS7	0.82875	-0.270992	0.362213	0.441036	357	0.488024	0.311559
[-].MESYHKPDQQKLQALK.[D]	1xAcetyl [N-Term]; 1xBiotin [K11]	2	2	P29401	P29401 [1-16]	P29401 1xAcetyl [N-Term]; 1xBiotin [K11]	Transketolase [OS=Homo sapiens]	1	2212.09	3229.17	2128.47	3110.07	2754.24	3064.56	6373.77	2089.89	7140.03	5004.73	3662.15	3289.24	2524.1	3306.29	5611.75	2478.16	3024.45	2731.86	2232.22	NoTM	outside	NO_DATA	TKT	1.43989	0.52596	0.362693	0.440461	358	0.487305	0.312199
[K].IVLQKYHTINGHNAEVR.[K]	1xBiotin [K5]	2	1	P22626	P22626 [169-185]	P22626 1xBiotin [K173]	heterogeneous nuclear ribonucleoproteins A2/B1 [OS=Homo sapiens]	1	2218.15	4139.84	3902.87	2314.77	3410.66	4842.52	4272.07	3118.72	4464.68	4183.49	2799.43	1950.73	3026.4	3750.42	1729.04	2287.41	2108.6	2126.98	4124.08	NoTM	outside	Nucleus;Nucleus, nucleoplasm;Cytoplasm;Cytoplasmic granule;Secreted, extracellular exosome;Component of ribonucleosomes (PubMed:17289661);Not found in the nucleolus (PubMed:17289661);Found in exosomes following sumoylation (PubMed:24356509);[Isoform A2]: Nucleus;Cytoplasm;[Isoform A2]: Nucleus;Cytoplasm	HNRNPA2B1	1.20929	0.274166	0.36524	0.437421	359	0.489361	0.310371
[K].VAKGQPLCVLSAMKMETVVTSPMEGTVR.[K]	1xBiotin [K]; 1xCarbamidomethyl [C8]	1	7	P11498	P11498 [1131-1158]	P11498 1xBiotin [K]	pyruvate carboxylase, mitochondrial [OS=Homo sapiens]	2	3245.62	3106.92	2756.1	6224.39	2973.75	6034.54	10511.7	3855.65	11066	3024.83	4108.61	1735.42	1777.94	3056.94	11259.7	17004.7	3123.83	19097.8	24110	NoTM	outside	Mitochondrion matrix	PC	1.6149	0.691446	0.369224	0.43271	360	0.493324	0.306867
[R].NVKAQSQTDR.[VA]	1xBiotin [K3]	8	8	P04439	P04439 [90-99]	P04439 1xBiotin [K92]	HLA class I histocompatibility antigen, A-3 alpha chain [OS=Homo sapiens]	1	1372.66	22364.6	21652.6	18388	20603.5	19062.8	18796.2	25352.1	23972.2	24516.5	14704.4	15889.5	13794.4	26703.6	20102	17125.1	11917.7	11391.4	9610.35	HasTM	outside	NO_DATA	HLA-A	0.936822	-0.0941537	0.38467	0.414912	361	0.512538	0.290274
[K].ISDSEGFKANLSLLR.[R]	1xBiotin [K8]	2	4	P23246-1	P23246-1 [272-286]	P23246-1 1xBiotin [K279]	splicing factor, proline- and glutamine-rich [OS=Homo sapiens]	1	1875.96	2658.86	3167.56	2818.75	1937.89	4297.9	5487.96	3758.81	4841.52	3261.6	2996.38	2916.55	3182.77	3993.9	3087.69	11825.3	2532.87	4333.81	2425.8	NoTM	outside	Nucleus speckle;Nucleus matrix;Cytoplasm	SFPQ	1.3561	0.439466	0.385362	0.414131	362	0.512042	0.290695
[K].SKGIAYIEFK.[T]	1xBiotin [K2]	1	1	P19338	P19338 [428-437]	P19338 1xBiotin [K429]	Nucleolin [OS=Homo sapiens]	1	1381.72	2672.72	3078.95	3881.16	3757.73	2947.25	4804.75	3992.93	4101.32	2563.99	3152.88	4023.51	2288.67	3351.93	4904.88	2590.88	1951.26	2509.65	1897.49	NoTM	outside	Nucleus, nucleolus;Cytoplasm	NCL	1.19484	0.256823	0.386521	0.412827	363	0.512167	0.290589
[R].FCKTTNTVEPLR.[G]	1xBiotin [K3]; 1xCarbamidomethyl [C2]	1	5	Q14210	Q14210 [44-55]	Q14210 1xBiotin [K46]	Lymphocyte antigen 6D [OS=Homo sapiens]	1	1691.82	3703.48	5313.09	8767.39	3991.83	5110.2	4415.75	6569.16	4483.94	6052.72	2144.9	2581.76	2831.23	8265.12	8969.44	3965.89	2597.09	2247.29	3766.86	HasTM	inside	Cell membrane;Lipid-anchor, GPI-anchor	LY6D	0.760111	-0.395718	0.404977	0.39257	364	0.535148	0.271526
[K].DISLSDYKGK.[Y]	1xBiotin [K8]	1	5	Q06830	Q06830 [28-37]	Q06830 1xBiotin [K35]	peroxiredoxin-1 [OS=Homo sapiens]	1	1351.66	2567.28	3804.73	3573.98	2670.8	3979.5	7172.41	1967.24	4765.57	4808.17	4113.98	4936.79	2036.36	3886.27	2973.22	4096.1	1787.02	3075.81	3328.64	NoTM	outside	Cytoplasm;Melanosome	PRDX1	1.38978	0.474854	0.405118	0.392419	365	0.533867	0.272567
[R].SLYNLGGSKR.[I]	1xBiotin [K9]	1	6	P13647	P13647 [64-73]	P13647 1xBiotin [K72]	keratin, type II cytoskeletal 5 [OS=Homo sapiens]	1	1320.67	1910.67	8732.33	9641.07	5494.14	11879.7	11961.1	9920.84	12690.2	13153.7	5801.61	7713.11	2581.88	6135.2	2661.18	8462.15	3863.48	1737.91	3457.17	NoTM	outside	NO_DATA	KRT5	1.44621	0.532274	0.405347	0.392173	366	0.53271	0.273509
[K].VQKLLQDFFNGR.[D]	1xBiotin [K3]	2	3	P0DMV8	P0DMV8 [346-357]	P0DMV8 1xBiotin [K348]	heat shock 70 kDa protein 1A [OS=Homo sapiens]	1	1690.87	2785.01	3704.38	3585.77	3999.76	3035.87	4429.92	3228.84	3970.22	3897.74	2348.38	2808.23	3197.77	2861.6	2886.44	2275.92	2620.13	3613.69	3283.43	NoTM	outside	Cytoplasm;Nucleus;Cytoplasm, cytoskeleton, microtubule organizing center, centrosome	HSPA1A	1.138	0.186503	0.409167	0.3881	367	0.536265	0.270621
[R].VNFAMNVGKAR.[G]	1xBiotin [K9]	3	4	P14618	P14618 [490-500]	P14618 1xBiotin [K498]	Pyruvate kinase PKM [OS=Homo sapiens]	1	1432.72	3714.76	2082.56	3479.55	2856.28	3634.49	5036.45	3415.85	4693.41	4281.71	3732.32	3894.72	3437.74	2926.37	2760.28	4098.39	2218.86	2058.67	3580.47	NoTM	outside	Cytoplasm;Nucleus;Nuclear translocation is sufficient to induce cell death that is caspase independent, isoform-specific and independent of its enzymatic activity	PKM	1.24258	0.313334	0.410153	0.387054	368	0.536097	0.270757
[R].LLKASIPFSVVGSNQLIEAK.[G]	1xBiotin [K3]	3	5	Q15019	Q15019 [230-249]	Q15019 1xBiotin [K232]	septin-2 [OS=Homo sapiens]	1	2340.3	3513.44	12647.7	14499.9	2316.51	7423.09	9794.16	3874.95	6937.47	5649.16	3315.07	6696.48	2707.42	3859.32	11645.9	16559.3	2749.75	12116.8	17821.7	NoTM	outside	Cytoplasm;Cytoplasm, cytoskeleton;Cytoplasm, cytoskeleton, spindle;Chromosome, centromere, kinetochore;Cleavage furrow;Midbody;Cytoplasm, cell cortex;Cell projection, cilium membrane;Cell projection, cilium, flagellum;At the metaphase plate, in close apposition to the kinetochores of the congressed chromosomes;In cells undergoing cytokinesis, localized to the midbody, the ingressing cleavage furr…	SEPTIN2	0.637088	-0.650436	0.411531	0.385598	369	0.53644	0.270479
[K].FHYKTDQGIK.[N]	1xBiotin [K4]	1	24	P04040	P04040 [234-243]	P04040 1xBiotin [K237]	catalase [OS=Homo sapiens]	1	1462.71	288365	339531	313906	232151	280734	336768	284062	275138	280457	135460	109998	105403	490803	448596	358887	213212	251586	185859	NoTM	outside	Peroxisome	CAT	0.902156	-0.148551	0.41287	0.384187	370	0.536731	0.270243
[R].GALQNIIPASTGAAKAVGK.[V]	1xBiotin [K15]	2	4	P04406-1	P04406-1 [201-219]	P04406-1 1xBiotin [K215]	glyceraldehyde-3-phosphate dehydrogenase [OS=Homo sapiens]	1	1993.09	2451.08	17656.4	17084.9	11311.5	18219.3	25112.6	8603.24	21724.8	21640.9	5134.12	16772.6	6471.26	15306.4	24623	24840.1	4025.92	15826.3	20405.1	NoTM	outside	Cytoplasm, cytosol;Nucleus;Cytoplasm, perinuclear region;Membrane;Cytoplasm, cytoskeleton;Postnuclear and Perinuclear regions	GAPDH	1.46921	0.555043	0.413095	0.38395	371	0.535576	0.271179
[K].LDSGKELHINLIPNK.[Q]	1xBiotin [K5]	3	4	P07900	P07900 [70-84]	P07900 1xBiotin [K74]	Heat shock protein HSP 90-alpha [OS=Homo sapiens]	1	1917.03	3216.45	3497.5	3943.11	2872.55	5557.7	4427.17	3820.99	5496.4	4633.29	2566.86	5124.86	3135.2	2998.38	4020.77	3615.75	2614.41	3793.73	2988.76	NoTM	outside	Nucleus;Cytoplasm;Melanosome;Cell membrane	HSP90AA1	1.20647	0.270792	0.414614	0.382356	372	0.5361	0.270754
[K].VDSKTVGQYEYYK.[V]	1xBiotin [K4]	1	5	P52799	P52799 [65-77]	P52799 1xBiotin [K68]	Ephrin-B2 [OS=Homo sapiens]	1	1805.84	3234.75	1990.06	2785.98	2271.1	2998.02	6038.25	4816.94	4361.72	2916.42	4063.63	3554.11	2433.47	1886.04	3366.42	1884	2018.74	1829.71	3053.08	HasTM	outside	Cell membrane;Cell junction, adherens junction	EFNB2	1.41152	0.497249	0.415109	0.381838	373	0.535301	0.271402
[K].ITYKYTGK.[G]	1xBiotin [K4]	1	11	Q14126	Q14126 [85-92]	Q14126 1xBiotin [K88]	Desmoglein-2 [OS=Homo sapiens]	1	1199.61	11682.6	20105.8	24998	9185.32	15576.8	18898.6	12777.7	18598.2	21111	2398.53	7507.28	4095.19	16773.1	29029.9	16614.4	2499.44	7219.34	6872.14	HasTM	outside	Cell membrane;Single-pass type I membrane protein;Cell junction, desmosome	DSG2	0.768859	-0.379209	0.415486	0.381444	374	0.534355	0.27217
[KR].VTIAQGGVLPNIQAVLLPKK.[T]	1xBiotin [K19]	10	2	Q16777	Q16777 [101-120]	Q16777 1xBiotin [K119]	Histone H2A type 2-C [OS=Homo sapiens]	1	2285.34	3963.73	2091.51	3759.02	3685.04	3519.62	4364.45	2767.79	4016.9	3334.68	2807.11	3024.96	2688.4	2646.81	3754.63	3836.12	3458.76	2748.13	4100.82	NoTM	outside	Nucleus;Chromosome	HIST2H2AC	1.17881	0.237327	0.416942	0.379924	375	0.534798	0.27181
[K].EITALAPSTMKIK.[I]	1xBiotin [K]	7	12	P60709	P60709 [316-328]	P60709 1xBiotin [K]	Actin, cytoplasmic 1 [OS=Homo sapiens]	1	1628.88	9403.33	20541.5	27160.3	15799.6	27931.7	32977.9	16889.4	32813.4	31427.6	20210	26496.8	17841.4	26387.2	27209.3	23490.6	16810.5	26442.7	19851.2	NoTM	outside	Cytoplasm, cytoskeleton;Nucleus	ACTB	1.3433	0.42578	0.419451	0.377319	376	0.536585	0.270361
[K].VVGAKVVTNAR.[S]	1xBiotin [K5]	5	10	Q15424-1	Q15424-1 [432-442]	Q15424-1 1xBiotin [K436]	Scaffold attachment factor B1 [OS=Homo sapiens]	1	1339.75	2316.46	11448.9	11984.3	9948.74	10833.4	14045.9	12199.5	11051.1	10540.4	12557.4	9094.68	12262.5	9746.49	19716.9	15785.7	10939.2	15171.4	17646.1	NoTM	outside	Nucleus	SAFB	1.35256	0.435693	0.42062	0.37611	377	0.536653	0.270306
[R].MQKEITALAPSTMK.[I]	1xBiotin [K3]	7	1	P60709	P60709 [313-326]	P60709 1xBiotin [K315]	Actin, cytoplasmic 1 [OS=Homo sapiens]	1	1774.89	2046.07	4118.73	4117.93	3293	2959.5	1865.72	3757.71	5000.41	3552.33	2192.77	3833.73	2229.39	3936.91	1857.39	2263.08	1813.39	2289.45	1831.52	NoTM	outside	Cytoplasm, cytoskeleton;Nucleus	ACTB	0.789501	-0.340987	0.425612	0.370987	378	0.541585	0.266333
[R].IGDLQAFQGHGAGNLAGLKGR.[L]	1xBiotin [K19]	4	15	P08195	P08195 [227-247]	P08195 1xBiotin [K245]	4F2 cell-surface antigen heavy chain [OS=Homo sapiens]	1	2306.18	32303.9	20843.4	39304.4	24101	26639.6	27260.4	12703.5	31673.9	18181.1	2161.98	8220.99	7558.04	33909.3	29275.3	30936.1	10136.5	10699.7	17923.5	HasTM	outside	Apical cell membrane;Cell membrane;Cell junction;Lysosome membrane;Melanosome;Localized at the plasma membrane when associated with SLC7A5 or SLC7A8 (PubMed:9751058, PubMed:11311135);Localized to the apical membrane of placental syncytiotrophoblastic cells (PubMed:11742812);Recruited to lysosomes by LAPTM4B (PubMed:25998567);Located selectively at cell- cell adhesion sites (By similarity);Colocal…	SLC3A2	0.843695	-0.245207	0.428023	0.368533	379	0.543217	0.265027
[R].TDKGDLSLR.[C]	1xBiotin [K3]	1	10	P09758	P09758 [136-144]	P09758 1xBiotin [K138]	Tumor-associated calcium signal transducer 2 [OS=Homo sapiens]	1	1230.61	14819.1	10795.5	11887.2	11263.9	14080.3	18588.5	18896	14377.9	12112.6	24451	21826.9	32290	8599.14	10535.2	7235.83	2800.65	5142.5	4435.99	HasTM	outside	Membrane;Single-pass type I membrane protein	TACSTD2	1.17148	0.228337	0.43067	0.365855	380	0.545138	0.263494
[K].IKDPDASKPEDWDER.[A]	1xBiotin [K2]	1	1	P27797	P27797 [208-222]	P27797 1xBiotin [K209]	Calreticulin [OS=Homo sapiens]	1	2026.92	1821.4	4049.42	3739.76	1881.41	5769.73	5831.91	3806.47	6002.72	5099.63	4097.62	3704.29	3880.64	3429.68	4701.84	2698.99	4034.28	3104.56	1990.77	NoTM	outside	Endoplasmic reticulum lumen;Cytoplasm, cytosol;Secreted, extracellular space, extracellular matrix;Cell surface;Sarcoplasmic reticulum lumen;Associated with the lytic granules in the cytolytic T-lymphocytes	CALR	1.40294	0.488451	0.432564	0.36395	381	0.546098	0.26273
[-].MATAEVLNIGKK.[L]	1xBiotin [K]; 1xMet-loss+Acetyl [N-Term]	2	4	P22234	P22234 [1-12]	P22234 1xBiotin [K]; 1xMet-loss+Acetyl [N-Term]	multifunctional protein ADE2 [OS=Homo sapiens]	1	1411.76	3438.2	2476.09	8531.26	1713.63	4052.34	3464.53	3594.39	3889.02	4128.36	2756.58	2451.93	3374.11	4166.73	7571.2	7253.89	4052.79	11499.3	5951.98	NoTM	outside	NO_DATA	PAICS	0.638986	-0.646144	0.434999	0.361512	382	0.547734	0.26143
[K].IKLYWSK.[V]	1xBiotin [K2]	4	6	Q6YHK3-1	Q6YHK3-1 [559-565]	Q6YHK3-1 1xBiotin [K560]	CD109 antigen [OS=Homo sapiens]	1	1163.63	3092.89	10266.1	13009.2	3971.88	6990.15	7284.53	7838.4	7665.46	7006.96	2495.08	1901.56	1925.85	9533.76	10825	10112.2	3258.37	3907.28	2848.28	NoTM	outside	Cell membrane	CD109	0.691992	-0.531173	0.43723	0.35929	383	0.549106	0.260343
[K].GQPLCVLSAMKMETVVTSPMEGTVR.[K]	1xBiotin [K11]; 1xCarbamidomethyl [C5]; 1xOxidation [M]	1	221	P11498	P11498 [1134-1158]	P11498 1xBiotin [K1144]	pyruvate carboxylase, mitochondrial [OS=Homo sapiens]	1	2963.42	416200	1.58184e+06	2.87812e+06	575524	1.11043e+06	1.28026e+06	131016	1.59656e+06	732397	222740	894909	326438	807130	1.4736e+06	2.67297e+06	1.0128e+06	1.82477e+06	2.89167e+06	NoTM	outside	Mitochondrion matrix	PC	0.608312	-0.717118	0.43929	0.357249	384	0.550256	0.259435
[K].KTDPSGLSK.[T]	1xBiotin [K1]	3	9	Q13740-1	Q13740-1 [423-431]	Q13740-1 1xBiotin [K423]	CD166 antigen [OS=Homo sapiens]	1	1158.58	92573	2051.85	3016.88	54737.3	56557.4	61818	87581	103943	71759.7	22519.8	1930.47	3205.98	98475.9	85913	3150.82	45667.3	2919.92	2981.3	HasTM	outside	Cell membrane;Cell projection, axon;Cell projection, dendrite;Colocalizes with CD6 and the TCR/CD3 complex at the immunological synapse (PubMed:15294938);[Isoform 3]: Secreted;[Isoform 3]: Secreted	ALCAM	1.77294	0.826142	0.450145	0.346648	385	0.562389	0.249963
[R].TADGIVSHLKK.[Q]	1xBiotin [K10]	1	1	P30101	P30101 [120-130]	P30101 1xBiotin [K129]	Protein disulfide-isomerase A3 [OS=Homo sapiens]	1	1394.75	1745.62	5510.12	5755.48	3189.15	6441.6	8165.65	6046.25	6545.63	8070.8	2271.25	3243.72	4034.17	3285.98	5492.07	3506.14	4056.26	3971.66	4052.22	NoTM	outside	Endoplasmic reticulum;Endoplasmic reticulum lumen;Melanosome	PDIA3	1.36778	0.451831	0.459846	0.337387	386	0.573021	0.24183
[K].DSYVGDEAQSKR.[G]	1xBiotin [K11]	6	3	P60709	P60709 [51-62]	P60709 1xBiotin [K61]	Actin, cytoplasmic 1 [OS=Homo sapiens]	1	1580.7	2581.36	3717.04	4075.54	2544.97	4793.15	5438.36	2413.09	3881.96	5856.88	2403.33	2719.9	3074.91	1982.77	2062.46	3992.63	2662.58	3544.48	3197.32	NoTM	outside	Cytoplasm, cytoskeleton;Nucleus	ACTB	1.23159	0.300526	0.462163	0.335205	387	0.574419	0.240771
[R].AMKTVFGVEPDLTR.[E]	1xBiotin [K3]	2	2	Q96KP4	Q96KP4 [400-413]	Q96KP4 1xBiotin [K402]	cytosolic non-specific dipeptidase [OS=Homo sapiens]	1	1789.9	4065.87	1904.95	6921.01	2871.64	3880.02	2480.82	3975.31	3881.91	3904.74	1752.22	2446.23	3140.33	1757.44	3905.02	4007.86	2723.42	7388.52	7144.63	NoTM	outside	Cytoplasm	CNDP2	0.71615	-0.481666	0.464845	0.332692	388	0.576264	0.239378
[R].HKMTTLTPAYHAENYSPEDNR.[F]	1xBiotin [K2]	2	9	Q6IA69	Q6IA69 [648-668]	Q6IA69 1xBiotin [K649]	glutamine-dependent NAD(+) synthetase [OS=Homo sapiens]	1	2701.21	3530.08	4622.36	10098	1711.72	4822.82	5999.77	2584.38	7759.84	2922.61	1729.86	4095.73	2615.79	6619.11	14513.7	7431.96	2152.96	8825.77	3662.47	NoTM	outside	NO_DATA	NADSYN1	0.686796	-0.542046	0.471858	0.326188	389	0.583455	0.233993
[R].SSKELLLQPVTISR.[N]	1xBiotin [K3]	3	1	P59998	P59998 [42-55]	P59998 1xBiotin [K44]	Actin-related protein 2/3 complex subunit 4 [OS=Homo sapiens]	1	1796.99	2390.43	4045.33	4037.86	4022.65	2575.3	1909.93	1953.75	3343.21	2451.78	2241	3533.61	2564.47	2295.29	2061.66	1949.21	2578.04	2187.47	2180.41	NoTM	outside	Cytoplasm, cytoskeleton;Cell projection;Nucleus	ARPC4	0.812315	-0.29989	0.474899	0.323399	390	0.585708	0.232319
[truncated: 91 more rows]

## Sheet: P<0.05 all DM
Annotated Sequence	Modifications	# Proteins	# PSMs	Master Protein Accessions	Positions in Master Proteins	Modifications in Master Proteins	Master Protein Descriptions	# Missed Cleavages	Theo. MH+ [Da]	Abundances (Normalized): F5: Sample, 1 A431-AGIA-FabID DMSO n=1	Abundances (Normalized): F15: Sample, 1 A431-AGIA-FabID DMSO n=2	Abundances (Normalized): F21: Sample, 1 A431-AGIA-FabID DMSO n=3	Abundances (Normalized): F8: Sample, 10 A431-EGFR-FabID DMSO n=1	Abundances (Normalized): F18: Sample, 10 A431-EGFR-FabID DMSO n=2	Abundances (Normalized): F24: Sample, 10 A431-EGFR-FabID DMSO n=3	Abundances (Normalized): F9: Sample, 13 A431-EGFR-FabID DMSO EGF n=1	Abundances (Normalized): F19: Sample, 13 A431-EGFR-FabID DMSO EGF n=2	Abundances (Normalized): F25: Sample, 13 A431-EGFR-FabID DMSO EGF n=3	Abundances (Normalized): F10: Sample, 16 A431-EGFR-FabID Gefitinib EGF n=1	Abundances (Normalized): F20: Sample, 16 A431-EGFR-FabID Gefitinib EGF n=2	Abundances (Normalized): F26: Sample, 16 A431-EGFR-FabID Gefitinib EGF n=3	Abundances (Normalized): F6: Sample, 4 A431-AGIA-FabID DMSO EGF n=1	Abundances (Normalized): F16: Sample, 4 A431-AGIA-FabID DMSO EGF n=2	Abundances (Normalized): F22: Sample, 4 A431-AGIA-FabID DMSO EGF n=3	Abundances (Normalized): F7: Sample, 7 A431-AGIA-FabID Gefitinib EGF n=1	Abundances (Normalized): F17: Sample, 7 A431-AGIA-FabID Gefitinib EGF n=2	Abundances (Normalized): F23: Sample, 7 A431-AGIA-FabID Gefitinib EGF n=3	TMHMM (TM helix)	TMHMM (in/out)	UniProt (Location)	Gene symbol	Ratio(EGFR-FabID/AGIA-FabID)	Ratio(Log2)	pValue	− p Value (LOG10)
[truncated: 122 more rows]

[truncated: 7 more sheets: P<0.05 membrane DM, EGFR-DM EGF AGIA-DM-EGF, P<0.05 all DM EGF, P<0.05 membrane DM EGF, EGFR-gef-EGF AGIA-gef-EGF, P<0.05 all Gef EGF, P<0.05 membrane Gef EGF]
